# Supplementary material for: Identification of core genes for early diagnosis and the EMT modulation of ovarian serous cancer by bioinformatics perspective
Source: publisher site journal article supplement (doi:10.18632/aging.202524), 2021-01-25
Supplement: Supplementary file [file aging-v13i2-202524-supplementary-material-SD5.pdf]

## SUPPLEMENTARY TABLES

Supplementary Table 4. Module analysis of co-DEGs using MCODE of Cytoscope.

| MCODE_Cluster    | MCODE_Node_Status | MCODE_Score        | name        | TopologicalCoefficient |
|------------------|-------------------|--------------------|-------------|------------------------|
| Cluster 1        | Clustered         | 21.32307692        | CDK1        | 0.24610988             |
| Cluster 1        | Clustered         | 21.32307692        | CCNB1       | 0.28399209             |
| Cluster 1        | Clustered         | 21.32307692        | CDC20       | 0.29765066             |
| Cluster 1        | Clustered         | 21.32307692        | KIF11       | 0.32624113             |
| Cluster 1        | Clustered         | 21.32307692        | TOP2A       | 0.33646245             |
| Cluster 1        | Clustered         | 21.32307692        | CDCA8       | 0.34704034             |
| Cluster 1        | Clustered         | 21.32307692        | BUB1B       | 0.36419753             |
| <b>Cluster 1</b> | <b>Seed</b>       | <b>21.32307692</b> | <b>ASPM</b> | <b>0.36976744</b>      |
| Cluster 1        | Clustered         | 21.32307692        | DLGAP5      | 0.38181271             |
| Cluster 1        | Clustered         | 21.32307692        | NDC80       | 0.35257453             |
| Cluster 1        | Clustered         | 21.32307692        | KIF2C       | 0.40125                |
| Cluster 1        | Clustered         | 21.32307692        | CENPF       | 0.40493421             |
| Cluster 1        | Clustered         | 21.32307692        | TTK         | 0.40350877             |
| Cluster 1        | Clustered         | 21.32307692        | KIF20A      | 0.40773229             |
| Cluster 1        | Clustered         | 18.8034188         | RRM2        | 0.34723854             |
| Cluster 1        | Clustered         | 21.32307692        | NUSAP1      | 0.41392318             |
| Cluster 1        | Clustered         | 20.51              | NCAPG       | 0.40590278             |
| Cluster 1        | Clustered         | 20.37              | TPX2        | 0.40785714             |
| Cluster 1        | Clustered         | 20.37              | CEP55       | 0.41801471             |
| Cluster 1        | Clustered         | 20.69565217        | UBE2C       | 0.42312009             |
| Cluster 1        | Clustered         | 19.98290598        | PBK         | 0.44112903             |
| Cluster 1        | Clustered         | 18                 | ESPL1       | 0.39016897             |
| Cluster 1        | Clustered         | 20.44              | KIF4A       | 0.45512821             |
| Cluster 1        | Clustered         | 19.60474308        | KIF15       | 0.44137931             |
| Cluster 1        | Clustered         | 19.49275362        | SPAG5       | 0.45767196             |
| Cluster 1        | Clustered         | 20.69565217        | MELK        | 0.46383929             |
| Cluster 1        | Clustered         | 18.90952381        | NUF2        | 0.45238095             |
| Cluster 1        | Clustered         | 19.76284585        | KIF23       | 0.43717728             |
| Cluster 1        | Clustered         | 17.81052632        | PRC1        | 0.41557223             |
| Cluster 1        | Clustered         | 18.81904762        | PTTG1       | 0.46615385             |
| Cluster 1        | Clustered         | 18.90952381        | MKI67       | 0.48839662             |
| Cluster 1        | Clustered         | 17.90526316        | CDCA3       | 0.50185185             |
| Cluster 2        | Clustered         | 14                 | KNTC1       | 0.48070175             |
| Cluster 2        | Clustered         | 14                 | CENPU       | 0.47387387             |
| Cluster 2        | Clustered         | 14                 | ZWINT       | 0.45855856             |
| Cluster 2        | Clustered         | 14                 | RCC2        | 0.48841699             |
| Cluster 2        | Clustered         | 14                 | CDCA5       | 0.48841699             |
| Cluster 3        | Clustered         | 5.727272727        | PCNA        | 0.23539618             |
| Cluster 3        | Clustered         | 5.785714286        | MCM10       | 0.22094361             |
| Cluster 3        | Clustered         | 5.5                | FEN1        | 0.31566265             |
| Cluster 3        | Clustered         | 5                  | DTL         | 0.34993614             |
| Cluster 3        | Clustered         | 5                  | DNA2        | 0.40613027             |
| Cluster 3        | Clustered         | 5                  | TIMELESS    | 0.41666667             |
| Cluster 3        | Clustered         | 5.785714286        | ORC6        | 0.35030864             |
| Cluster 3        | Clustered         | 5                  | RMI2        | 0.44387755             |

|                  |             |                    |                |                   |
|------------------|-------------|--------------------|----------------|-------------------|
| <b>Cluster 3</b> | <b>Seed</b> | <b>6</b>           | <b>CHTF18</b>  | <b>0.53571429</b> |
| Cluster 3        | Clustered   | 5.785714286        | CDC7           | 0.30892857        |
| Cluster 3        | Clustered   | 5                  | RAD51AP1       | 0.52857143        |
| Cluster 4        | Clustered   | 7.418181818        | MCM3           | 0.26919476        |
| Cluster 4        | Clustered   | 8                  | MCM7           | 0.26763285        |
| <b>Cluster 4</b> | <b>Seed</b> | <b>8</b>           | <b>MCM2</b>    | <b>0.25791624</b> |
| Cluster 5        | Clustered   | 3.771428571        | RFC4           | 0.19430761        |
| <b>Cluster 5</b> | <b>Seed</b> | <b>4.581818182</b> | <b>POLE2</b>   | <b>0.2029321</b>  |
| Cluster 5        | Clustered   | 4                  | ISG15          | 0.50641026        |
| Cluster 6        | Clustered   | 2                  | LAMC1          | 0.66666667        |
| <b>Cluster 6</b> | <b>Seed</b> | <b>2</b>           | <b>SPARCL1</b> | <b>0.83333333</b> |
| Cluster 6        | Clustered   | 2                  | STC2           | 0.83333333        |
| <b>Cluster 7</b> | <b>Seed</b> | <b>2</b>           | <b>VIM</b>     | <b>1</b>          |
| Cluster 7        | Clustered   | 2                  | TNNI3          | 1                 |
| Cluster 7        | Clustered   | 2                  | TNNT1          | 1                 |
| <b>Cluster 8</b> | <b>Seed</b> | <b>2</b>           | <b>KAT2B</b>   | <b>0.43333333</b> |
| Cluster 8        | Clustered   | 2                  | E2F3           | 0.53333333        |
| Cluster 8        | Clustered   | 2                  | MEF2C          | 0.75              |
| Cluster 9        | Clustered   | 2                  | GAPDH          | 1                 |
| Cluster 9        | Clustered   | 2                  | TPI1           | 1                 |
| <b>Cluster 9</b> | <b>seed</b> | <b>2</b>           | <b>GPI</b>     | <b>1</b>          |

**Supplementary Table 5. Hub genes evaluated by PPI network analysis Degree>40 or the seed genes in MOCODE analysis of Cytoscape.**

| Entrez ID | Gene symbol | Description                                                          | Alternate names                                       | Chromosome | Map location |
|-----------|-------------|----------------------------------------------------------------------|-------------------------------------------------------|------------|--------------|
| 63922     | CHTF18      | chromosome transmission fidelity factor 18                           | C16orf41 C321D2.2 C321D2.3 C321D2.4 CHL12 Ctf18 RUVBL | 16         | 16p13.3      |
| 4171      | MCM2        | minichromosome maintenance complex component 2                       | BM28 CCNL1 CDCL1 D3S3194 MITOTIN cdc19                | 3          | 3q21         |
| 5427      | POLE2       | polymerase (DNA directed), epsilon 2, accessory subunit              | DPE2                                                  | 14         | 14q21-q22    |
| 8404      | SPARCL1     | SPARC-like 1 (hevin)                                                 | MAST 9 MAST9 PIG33 SC1                                | 4          | 4q22.1       |
| 7431      | VIM         | vimentin                                                             | CTRCT30 HEL113                                        | 10         | 10p13        |
| 8850      | KAT2B       | K(lysine) acetyltransferase 2B                                       | CAF P/CAF PCAF                                        | 3          | 3p24         |
| 983       | CDK1        | cyclin-dependent kinase 1                                            | CDC2 CDC28A P34CDC2                                   | 10         | 10q21.1      |
| 891       | CCNB1       | cyclin B1                                                            | CCNB                                                  | 5          | 5q12         |
| 991       | CDC20       | cell division cycle 20                                               | CDC20A bA276H19.3 p55CDC                              | 1          | 1p34.1       |
| 3832      | KIF11       | kinesin family member 11                                             | EG5 HKSP KNSL1 MCLMR TRIP5                            | 10         | 10q24.1      |
| 7153      | TOP2A       | topoisomerase (DNA) II alpha 170kDa                                  | TOP2 TP2A                                             | 17         | 17q21-q22    |
| 55143     | CDCA8       | cell division cycle associated 8                                     | BOR BOREALIN DasraB MESRGP                            | 1          | 1p34.3       |
| 701       | BUB1B       | BUB1 mitotic checkpoint serine/threonine kinase B                    | BUB1beta BUBR1 Bub1A MAD3L MVA1 SSK1 hBUBR1           | 15         | 15q15        |
| 259266    | ASPM        | asp (abnormal spindle) homolog, microcephaly associated (Drosophila) | ASP Calmbp1 MCPH5                                     | 1          | 1q31         |
| 9787      | DLGAP5      | discs, large (Drosophila) homolog-associated protein 5               | DLG7 HURP                                             | 14         | 14q22.3      |
| 10403     | NDC80       | NDC80 kinetochore complex component                                  | HEC HEC1 HsHec1 KNTC2 TID3 hsNDC80                    | 18         | 18p11.32     |

**Supplementary Table 6. KEGG enrichment of core genes and EMT regulators.**

| Pathway ID | Description                                     | Count in gene set | False Discovery Rate |
|------------|-------------------------------------------------|-------------------|----------------------|
| hsa04520   | Adherens junction                               | 4 of 71           | 1.77E-05             |
| hsa04390   | Hippo signaling pathway                         | 3 of 152          | 0.0059               |
| hsa05216   | Thyroid cancer                                  | 2 of 37           | 0.0067               |
| hsa05205   | Proteoglycans in cancer                         | 3 of 195          | 0.0067               |
| hsa05213   | Endometrial cancer                              | 2 of 58           | 0.008                |
| hsa05130   | Pathogenic Escherichia coli infection           | 2 of 53           | 0.008                |
| hsa05412   | Arrhythmogenic right ventricular cardiomyopathy | 2 of 72           | 0.0103               |
| hsa05100   | bacterial invasion of Epithelial cells          | 2 of 72           | 0.0103               |
| hsa05215   | Prostate cancer                                 | 2 of 97           | 0.0142               |
| hsa04514   | cell adhesion molecules(CAMs)                   | 2 of 139          | 0.0254               |
| hsa05226   | Gastric cancer                                  | 2 of 147          | 0.0257               |
| hsa05206   | MicroRNAs in cancer                             | 2 of 149          | 0.0257               |
| hsa05202   | Transcriptional misregulation in cancer         | 2 of 169          | 0.0284               |
| hsa04015   | Rap1 signaling pathway                          | 2 of 203          | 0.0373               |

**Supplementary Table 7. Primers used for the real-time PCR.**

| <b>Gene</b>    | <b>Primers</b> | <b>Sequences (5'-3')</b> |
|----------------|----------------|--------------------------|
| $\beta$ -actin | Forward        | CCACGAAACTACCTTCAACTCC   |
|                | Reverse        | GTGATCTCCTTCTGCATCCTGT   |
| ELF3           | Forward        | GCAAACACCCTGGACTTGAC     |
|                | Reverse        | CTGTCCTTCATCACGGTGC      |
| TFAP2A         | Forward        | ATATCCGTTACGCCGATCC      |
|                | Reverse        | CCTCGCAGTCCTCGTACTTG     |
| BUB1B          | Forward        | GGGATGGGTCCCTTCTGGAAA    |
|                | Reverse        | GGCATTTCAGAATCCGCACAA    |
| NDC80          | Forward        | CCTGGTGTTTTTGATGACCGC    |
|                | Reverse        | TCCAGTTTCCTGACACGACC     |
