# Supplementary material for: Identification of core genes for early diagnosis and the EMT modulation of ovarian serous cancer by bioinformatics perspective
Source: Aging (Albany NY). 2021 Jan 25;13(2):3112–45. doi: 10.18632/aging.202524 (PMC7880353; doi:10.18632/aging.202524)
Supplement: Supplementary Table 2 [file aging-13-202524-s003.xlsx]

## Sheet: GSE36668-DEG
Genesymbol	logFC	AveExpr	t	P.Value	adj.P.Val	B
PEG3-AS1	-3.3024	6.40347	-22.6739	9.08007e-09	0.000127243	10.2734
HLF	-3.83363	6.67501	-21.819	1.24382e-08	0.000127243	10.0459
SCRIB	1.90116	8.40876	19.7992	2.7506e-08	0.000174236	9.44601
LINC00924	-2.63463	5.49253	-18.7586	4.2703e-08	0.000174236	9.09807
IGFBP1	-2.13817	4.20078	-18.3334	5.14588e-08	0.000174236	8.94737
TSHZ3	-3.06319	7.16813	-18.3231	5.16963e-08	0.000174236	8.94362
TNNT1	3.94698	6.99095	18.0047	5.96117e-08	0.000174236	8.82723
GPRASP1	-3.30029	8.04512	-16.2995	1.33519e-07	0.00029242	8.14914
CNRIP1	-2.62489	8.21921	-16.1638	1.42857e-07	0.00029242	8.09087
AHNAK2	2.24949	5.91585	16.1628	1.42923e-07	0.00029242	8.09047
CCDC69	-2.10579	6.16106	-15.5752	1.92721e-07	0.000343127	7.83027
DPP3	2.23226	7.01105	15.318	2.204e-07	0.000343127	7.71215
OLFML3	-2.2187	9.72314	-15.2687	2.26201e-07	0.000343127	7.6892
MUM1L1	-4.42639	9.49116	-15.1442	2.41613e-07	0.000343127	7.63082
CHD7	1.58653	5.97094	15.0685	2.51559e-07	0.000343127	7.595
NDN	-2.1572	8.86936	-14.7563	2.97685e-07	0.000380665	7.44477
PTH2R	3.33078	5.43064	14.3558	3.71264e-07	0.000396853	7.24589
ARPC1B	2.91817	8.59463	14.2882	3.856e-07	0.000396853	7.21158
PIK3C2B	1.45823	7.6021	14.2855	3.86168e-07	0.000396853	7.21025
SIGLEC16	-3.46527	7.36154	-14.2774	3.87931e-07	0.000396853	7.20612
C1orf210	1.14314	4.63661	14.1332	4.2082e-07	0.000409999	7.13221
FAM49B	1.64699	6.37371	13.9953	4.55191e-07	0.000423327	7.06065
MAGI2-AS3	-1.65316	5.05115	-13.8694	4.89334e-07	0.000430549	6.99452
PTPRN2	-1.86696	6.06859	-13.7508	5.24138e-07	0.000430549	6.93151
PID1	-1.42554	4.46446	-13.6299	5.6248e-07	0.000430549	6.86658
RWDD4	-1.41585	8.38017	-13.6123	5.68297e-07	0.000430549	6.8571
VTCN1	4.52677	6.74599	13.5591	5.86356e-07	0.000430549	6.82826
PRKCD	2.04483	6.79456	13.506	6.05021e-07	0.000430549	6.79933
RNF180	-2.11788	4.31275	-13.4914	6.1026e-07	0.000430549	6.79136
CCDC6	1.32046	8.87328	13.3724	6.54971e-07	0.00044669	6.72594
FLAD1	1.72141	6.50232	13.0954	7.73907e-07	0.000507397	6.57081
TSPAN5	-2.76499	7.70917	-13.0225	8.09111e-07	0.000507397	6.52929
DDX5	-1.05099	7.85595	-13.0039	8.18382e-07	0.000507397	6.51864
STAR	-4.36919	8.53722	-12.8681	8.89666e-07	0.000531669	6.44046
MRPL15	1.50858	8.96725	12.764	9.48995e-07	0.000531669	6.37987
NDNL2	-1.33385	6.16005	-12.7638	9.4913e-07	0.000531669	6.37973
NR2F1-AS1	-1.82513	5.22496	-12.6898	9.94015e-07	0.000531669	6.33627
SLC50A1	1.51875	6.95369	12.6387	1.02633e-06	0.000531669	6.30614
RGN	-2.37012	7.05691	-12.6326	1.0303e-06	0.000531669	6.3025
SIRT1	-1.34292	7.10035	-12.6186	1.03943e-06	0.000531669	6.29418
CHGB	-4.21297	6.94797	-12.5137	1.11059e-06	0.000538724	6.23168
CTNNAL1	-2.33249	9.63684	-12.4865	1.12995e-06	0.000538724	6.21534
NCAPG2	1.41772	5.48996	12.4833	1.13221e-06	0.000538724	6.21345
ZNF385B	-3.87555	5.54199	-12.412	1.18485e-06	0.000539054	6.17044
PPP1R16A	1.87086	7.83615	12.3982	1.19534e-06	0.000539054	6.16209
TAGLN2	1.51683	8.89005	12.3404	1.24041e-06	0.000539054	6.127
LCN2	6.34266	8.35349	12.3225	1.25477e-06	0.000539054	6.11608
AGPAT9	-3.24425	7.03409	-12.3103	1.26464e-06	0.000539054	6.10864
TMPRSS4	2.7894	6.15017	12.2261	1.33532e-06	0.000551246	6.05697
AASS	-2.0153	5.05528	-12.1852	1.37118e-06	0.000551246	6.03175
RPL36AL	-1.33489	11.3025	-12.1162	1.43424e-06	0.000551246	5.98892
RBM12	-1.16167	7.778	-12.1148	1.43554e-06	0.000551246	5.98805
BEND3	1.47528	6.60877	12.0942	1.45502e-06	0.000551246	5.9752
PDZRN3	-1.32875	6.36699	-12.0201	1.52744e-06	0.000551246	5.92883
TTK	3.939	5.2869	11.9668	1.58195e-06	0.000551246	5.89531
CBX7	-1.5431	8.01241	-11.948	1.60175e-06	0.000551246	5.88342
UBE2C	3.36531	6.73018	11.885	1.67008e-06	0.000551246	5.84342
EFHD1	-2.06307	7.56491	-11.8806	1.67493e-06	0.000551246	5.84064
CYC1	1.52242	8.8869	11.8438	1.71643e-06	0.000551246	5.81718
RCC2	1.70309	8.84255	11.8251	1.73797e-06	0.000551246	5.80522
DZIP1	-2.2591	6.76762	-11.8137	1.75131e-06	0.000551246	5.79789
GRHL2	1.97466	6.20743	11.7854	1.7847e-06	0.000551246	5.77975
LRP2BP	-1.50009	5.12942	-11.7852	1.78492e-06	0.000551246	5.77964
ECT2	1.62876	4.64081	11.7792	1.79212e-06	0.000551246	5.77577
C1orf106	4.42102	7.52713	11.7621	1.81275e-06	0.000551246	5.76478
MUC16	6.04159	8.57742	11.747	1.83129e-06	0.000551246	5.755
MATR3	3.57275	6.44447	11.7431	1.83612e-06	0.000551246	5.75247
ATRNL1	-2.67587	5.5924	-11.7194	1.86557e-06	0.000551246	5.73718
BAIAP2L1	2.63266	6.28948	11.7098	1.87764e-06	0.000551246	5.73098
PPP1R35	1.26665	7.31841	11.7005	1.88942e-06	0.000551246	5.72496
PARP12	1.89818	8.08883	11.6668	1.93288e-06	0.000551246	5.70308
FDPS	1.52932	8.99072	11.6455	1.96092e-06	0.000551246	5.68921
DUXAP10	2.50152	5.80572	11.6411	1.96681e-06	0.000551246	5.68632
CDO1	-2.02901	5.62077	-11.6014	2.02039e-06	0.000552385	5.66043
GPM6A	-3.3429	6.40207	-11.5981	2.02487e-06	0.000552385	5.65829
GUCY1B2	1.66876	5.01394	11.5722	2.06089e-06	0.000554814	5.64129
OXLD1	1.23876	7.12374	11.5386	2.10862e-06	0.000556373	5.6192
NAP1L3	-3.8442	6.87929	-11.514	2.14435e-06	0.000556373	5.60299
RACGAP1	2.86742	7.17164	11.4875	2.18351e-06	0.000556373	5.5855
NAP1L5	-2.26055	6.5289	-11.4824	2.19124e-06	0.000556373	5.58209
ECM2	-2.06163	6.63424	-11.4573	2.22914e-06	0.000556373	5.56552
ANG	-2.49333	7.04459	-11.4569	2.22984e-06	0.000556373	5.56521
PCSK5	-2.23938	6.54911	-11.4135	2.2973e-06	0.000566298	5.53639
MCC	-2.68197	7.54976	-11.3761	2.35743e-06	0.000570648	5.51138
UFSP2	-1.53595	8.11216	-11.3629	2.37896e-06	0.000570648	5.50257
GIPC1	2.12901	8.04214	11.351	2.39862e-06	0.000570648	5.4946
TCEAL2	-3.23194	8.49491	-11.3302	2.4335e-06	0.000572292	5.48061
FHL2	-2.0008	10.6019	-11.3093	2.4691e-06	0.000572782	5.46653
NMU	2.68487	5.30178	11.2868	2.50789e-06	0.000572782	5.45141
VEGFA	2.09188	6.95132	11.247	2.57842e-06	0.000572782	5.4245
SIGLEC11	-3.52909	7.36923	-11.2338	2.6024e-06	0.000572782	5.41551
GNG4	-1.54469	5.12277	-11.23	2.60926e-06	0.000572782	5.41295
ARHGAP6	-1.3962	5.5189	-11.2054	2.65453e-06	0.000572782	5.39624
TTC39A	1.01188	4.34758	11.2026	2.65975e-06	0.000572782	5.39433
CPQ	-2.16046	7.7499	-11.1886	2.68602e-06	0.000572782	5.38478
RNASE4	-3.026	8.03437	-11.1763	2.70928e-06	0.000572782	5.3764
FAM83D	3.1897	5.66877	11.173	2.71553e-06	0.000572782	5.37416
C1QTNF7	-2.08971	5.28065	-11.1306	2.79765e-06	0.000579363	5.34518
NUDT1	1.35851	6.52161	11.1165	2.82562e-06	0.000579363	5.3355
IL17D	-2.08702	5.61886	-11.1088	2.84095e-06	0.000579363	5.33023
C12orf57	-1.62743	10.9314	-11.0994	2.86e-06	0.000579363	5.32372
CDK5	1.90434	5.95468	11.0686	2.92297e-06	0.000585721	5.30251
SLC39A4	2.78644	7.38673	11.0562	2.94865e-06	0.000585721	5.29398
SCD5	-1.02704	6.07215	-11.0383	2.98627e-06	0.000586709	5.28162
LOC100310756	1.34581	6.62039	11.0267	3.01097e-06	0.000586709	5.27359
POLR2H	1.37302	9.26955	11	3.06874e-06	0.00058903	5.25505
NT5E	-1.8206	5.72349	-10.9947	3.08046e-06	0.00058903	5.25134
TBC1D4	-2.36879	8.21371	-10.9388	3.20571e-06	0.000607305	5.21242
HMGN5	-1.16613	4.68312	-10.9104	3.2715e-06	0.000614081	5.19257
PALM3	2.28395	5.90474	10.8851	3.33143e-06	0.000614936	5.17483
KIT	-3.84106	7.49324	-10.8712	3.3649e-06	0.000614936	5.16505
CP	5.75328	7.17597	10.8648	3.38056e-06	0.000614936	5.16051
LINC00665	1.41737	5.27781	10.8583	3.39627e-06	0.000614936	5.15597
CPED1	-2.29444	7.40478	-10.8414	3.43803e-06	0.000615706	5.14401
DDX39A	2.88986	8.76724	10.8323	3.46071e-06	0.000615706	5.13758
ASPSCR1	1.29182	6.02529	10.8093	3.51843e-06	0.000617229	5.12138
RNASEH2A	1.82754	7.24959	10.7964	3.5515e-06	0.000617229	5.11222
ZNF692	1.30838	7.88113	10.7932	3.55977e-06	0.000617229	5.10994
LAD1	2.02149	5.70325	10.7389	3.70289e-06	0.000629034	5.0713
ARX	-1.67199	7.37075	-10.7236	3.74416e-06	0.000629034	5.06043
TACC3	2.31579	6.03252	10.7164	3.76385e-06	0.000629034	5.05528
TMEM150C	-2.84942	6.94485	-10.7045	3.79671e-06	0.000629034	5.04676
SRGAP2C	-1.39595	7.39517	-10.6917	3.8324e-06	0.000629034	5.03757
VAV1	1.48833	5.32564	10.6816	3.86073e-06	0.000629034	5.03034
PROM2	1.30659	5.86336	10.6597	3.92298e-06	0.000629034	5.01463
RAB3D	1.19396	5.92841	10.655	3.93645e-06	0.000629034	5.01127
GNG11	-2.94265	6.84657	-10.6443	3.96753e-06	0.000629034	5.00354
CLSTN2	-3.81011	7.23628	-10.6414	3.97601e-06	0.000629034	5.00144
CCDC181	-1.85154	4.52114	-10.6261	4.02058e-06	0.000629034	4.99049
RGS22	-2.07604	6.52766	-10.6238	4.02754e-06	0.000629034	4.98879
ABHD17C	1.77576	5.40423	10.5681	4.19584e-06	0.000633702	4.94853
BUB1B	3.7197	6.10494	10.5339	4.30336e-06	0.000633702	4.92363
FAM114A1	-1.26642	7.83656	-10.533	4.30613e-06	0.000633702	4.923
LAG3	-1.78834	5.39765	-10.5282	4.32139e-06	0.000633702	4.91951
CRABP2	4.23715	8.43209	10.5099	4.38035e-06	0.000633702	4.90617
ALDH3B2	1.63533	4.71784	10.4942	4.43177e-06	0.000633702	4.89467
INPPL1	1.34962	7.33947	10.4927	4.43649e-06	0.000633702	4.89362
TNFRSF21	1.82648	6.44768	10.4924	4.43753e-06	0.000633702	4.89339
ANKRD35	-2.1904	6.45722	-10.4918	4.43955e-06	0.000633702	4.89294
CKS1B	1.66208	8.84342	10.491	4.44221e-06	0.000633702	4.89235
ABHD11	1.12995	5.95892	10.4867	4.45625e-06	0.000633702	4.88924
NBEA	-2.67928	6.31612	-10.4856	4.46007e-06	0.000633702	4.8884
MAN2B2	-1.39506	7.4956	-10.464	4.53206e-06	0.000639489	4.87262
ANGPTL1	-2.94442	5.8003	-10.4367	4.62535e-06	0.000648182	4.85252
PSD4	1.31238	5.16745	10.3977	4.76192e-06	0.000659303	4.82381
LINC00176	2.10425	5.5911	10.3792	4.82831e-06	0.000663002	4.81014
PYCRL	1.35731	5.7103	10.3473	4.94503e-06	0.000669829	4.78655
HES6	1.48438	5.23835	10.3245	5.0305e-06	0.000669829	4.76961
NLRP7	1.90201	4.71356	10.3148	5.06739e-06	0.000669829	4.76239
UBE2T	2.76065	5.61652	10.2929	5.1518e-06	0.000669829	4.74606
GGT6	1.66625	5.35076	10.2926	5.15295e-06	0.000669829	4.74583
HIST1H2AC	2.41956	8.42456	10.2926	5.15308e-06	0.000669829	4.74581
NOTCH3	1.68756	5.91602	10.2923	5.15405e-06	0.000669829	4.74562
GINS1	3.2851	6.14881	10.2803	5.20113e-06	0.000669829	4.73663
DUSP26	-1.88284	6.37859	-10.2792	5.20529e-06	0.000669829	4.73584
C8orf88	-2.07209	5.59607	-10.2792	5.20542e-06	0.000669829	4.73582
WBP5	-1.72731	10.5381	-10.2553	5.30047e-06	0.000677797	4.71791
ACSS3	-1.29749	7.12447	-10.2412	5.35708e-06	0.000678091	4.7074
CDR2L	2.80322	7.11849	10.2383	5.36905e-06	0.000678091	4.70519
B3GALT2	-2.88257	4.33792	-10.2296	5.40437e-06	0.000678364	4.69869
BORA	1.54652	5.02443	10.1882	5.57728e-06	0.000691865	4.6675
CAMK1D	1.44117	5.78998	10.1788	5.61732e-06	0.000691865	4.66041
LGALS3BP	1.23539	10.497	10.1608	5.69504e-06	0.000691865	4.64679
MAP4K1	1.18081	5.37609	10.1589	5.7032e-06	0.000691865	4.64537
SLC52A2	1.8826	6.43742	10.1501	5.74154e-06	0.000691865	4.63873
PPP1CA	1.84084	8.97909	10.1454	5.76229e-06	0.000691865	4.63515
MPDZ	-1.92136	7.75379	-10.1385	5.79258e-06	0.000691865	4.62995
CDH11	-2.51588	8.1404	-10.1365	5.80185e-06	0.000691865	4.62836
PKM	2.16482	8.796	10.1312	5.82535e-06	0.000691865	4.62435
BBS7	-1.20248	5.07778	-10.1256	5.85008e-06	0.000691865	4.62015
DTX3L	1.35363	9.45706	10.0967	5.98131e-06	0.00070332	4.59814
GSTM5	-2.88748	7.26432	-10.0656	6.12587e-06	0.000716202	4.57443
SGPL1	1.29758	6.79178	10.0504	6.19783e-06	0.000718085	4.56283
MREG	2.34246	5.35786	10.0382	6.2566e-06	0.000718085	4.55345
EZH2	2.597	6.21896	10.0324	6.28438e-06	0.000718085	4.54905
PRKAR2B	-2.89014	8.37014	-10.0258	6.31645e-06	0.000718085	4.54399
ECI2	-1.25213	8.90154	-10.0212	6.33911e-06	0.000718085	4.54043
AKAP12	-2.02077	7.61914	-10.0184	6.35256e-06	0.000718085	4.53833
VANGL1	1.37693	6.72584	9.99423	6.47258e-06	0.000727632	4.51972
CDC20	3.98329	6.60289	9.95966	6.64835e-06	0.000739268	4.49307
MEF2BNB	1.45996	6.66781	9.93963	6.75262e-06	0.000739413	4.47758
TIMP2	-1.23108	10.245	-9.93859	6.75807e-06	0.000739413	4.47678
TSPAN12	2.93847	5.56346	9.90047	6.96173e-06	0.000754741	4.44721
YKT6	1.30734	5.89052	9.89164	7.00991e-06	0.000754857	4.44034
C1orf116	1.58445	4.98598	9.87471	7.10326e-06	0.000757548	4.42716
HS3ST3A1	-3.37104	6.52754	-9.86325	7.16718e-06	0.000757548	4.41823
OPLAH	1.7968	6.22918	9.86147	7.17721e-06	0.000757548	4.41684
PSAT1	2.52324	6.65588	9.8567	7.20405e-06	0.000757548	4.41312
CMTM8	2.1811	6.08276	9.84768	7.25516e-06	0.000757548	4.40607
CLDN7	3.35434	7.26883	9.84215	7.28669e-06	0.000757548	4.40175
CXorf57	-1.83633	4.02887	-9.84085	7.29409e-06	0.000757548	4.40074
PARM1	-2.3554	6.17841	-9.81406	7.44917e-06	0.000769351	4.37975
F11R	2.11723	7.08436	9.80577	7.49787e-06	0.000769351	4.37325
PEA15	1.91849	9.13459	9.80194	7.52054e-06	0.000769351	4.37024
PITPNM3	-1.50319	5.66671	-9.76728	7.7288e-06	0.000780778	4.34298
MAGEH1	-1.50468	7.84174	-9.7638	7.75002e-06	0.000780778	4.34024
HS6ST2	-2.18018	5.80577	-9.75817	7.78458e-06	0.000780778	4.3358
TRIM47	1.82815	7.09366	9.75812	7.78489e-06	0.000780778	4.33576
CENPF	1.64058	5.07314	9.7481	7.84676e-06	0.000783145	4.32785
F8	-3.11047	7.7092	-9.73598	7.92237e-06	0.000786853	4.31827
SDC2	-3.02937	7.4712	-9.72076	8.01843e-06	0.000792546	4.30623
RECK	-1.04533	5.34451	-9.68976	8.21817e-06	0.000794651	4.28164
SPINT2	2.05958	9.72585	9.68764	8.23205e-06	0.000794651	4.27996
CHPF2	1.19064	6.97889	9.68447	8.25279e-06	0.000794651	4.27744
KRTCAP3	2.83436	6.11848	9.67734	8.29978e-06	0.000794651	4.27176
NCAPD2	2.26642	6.24915	9.66969	8.35044e-06	0.000794651	4.26568
ZMAT1	-1.04359	4.96556	-9.64207	8.53634e-06	0.000805189	4.24365
HS3ST3B1	-1.66929	4.88223	-9.63872	8.55918e-06	0.000805189	4.24098
CDKN2AIP	-1.45173	6.31134	-9.63097	8.61231e-06	0.000805189	4.23479
ALG3	1.55486	7.40394	9.63006	8.6186e-06	0.000805189	4.23406
BC069782 /// STAMBPL1	-1.08145	4.94027	-9.60637	8.78343e-06	0.00081182	4.21509
IFI27	5.46016	8.62313	9.60279	8.8086e-06	0.00081182	4.21223
PARP1	1.43692	7.8711	9.59192	8.88568e-06	0.000815251	4.2035
NR2F6	1.11697	6.10911	9.57785	8.98656e-06	0.000815948	4.1922
TERF2IP	-1.11975	8.95735	-9.57288	9.02249e-06	0.000815948	4.1882
KLK8	2.92879	6.28815	9.5638	9.08849e-06	0.000815948	4.1809
FOXL2	-3.50191	8.01994	-9.5554	9.15011e-06	0.000815948	4.17413
SCML2	-1.31759	7.33367	-9.55319	9.16635e-06	0.000815948	4.17235
CENPU	1.63973	5.20665	9.54699	9.21225e-06	0.000815948	4.16735
NEK1	-1.46674	5.09474	-9.54584	9.22074e-06	0.000815948	4.16642
ATP8B1	1.599	7.47404	9.53816	9.27793e-06	0.000815948	4.16023
LZTS3	1.53665	8.94422	9.53648	9.29053e-06	0.000815948	4.15887
ZMYND8	1.26241	6.97186	9.53096	9.33195e-06	0.000815948	4.15441
RAD51AP1	2.62431	5.58289	9.51308	9.4675e-06	0.000824277	4.13995
PARP9	1.48638	6.97591	9.49549	9.60298e-06	0.000832529	4.1257
TSPYL2	-1.68043	8.98408	-9.48935	9.6508e-06	0.000833145	4.12072
SORD	1.18163	5.78727	9.47731	9.74533e-06	0.000837771	4.11094
CARKD	-1.17183	9.22624	-9.46027	9.88082e-06	0.000845864	4.09708
PSENEN	1.52013	7.13278	9.45212	9.94642e-06	0.000847932	4.09044
MUC1	4.70526	8.16327	9.44289	1.00212e-05	0.000850766	4.08292
ANTXR2	-1.54499	6.08521	-9.43713	1.00682e-05	0.000851224	4.07822
MARVELD3	1.12708	5.30278	9.43003	1.01266e-05	0.000852631	4.07242
RPN2	1.29136	10.8383	9.39469	1.04223e-05	0.000869278	4.04351
FGF2	-2.31418	5.18336	-9.37874	1.05589e-05	0.000869278	4.03042
GTF3A	1.10048	9.46094	9.37753	1.05693e-05	0.000869278	4.02943
FBLN2	1.4065	5.12116	9.37654	1.05779e-05	0.000869278	4.02861
COL4A1	1.81431	7.73323	9.37433	1.05971e-05	0.000869278	4.0268
OVOL2	2.08793	6.01469	9.37231	1.06146e-05	0.000869278	4.02514
ATP5B	1.15961	10.8081	9.37149	1.06217e-05	0.000869278	4.02446
LEMD1-AS1	-3.72069	6.40782	-9.36497	1.06784e-05	0.000870439	4.01911
MEST	2.43066	8.99797	9.35113	1.08001e-05	0.000870546	4.00772
LRRN4CL	-2.48205	7.38466	-9.34965	1.08132e-05	0.000870546	4.0065
TMEM47	-1.84133	7.70374	-9.34298	1.08725e-05	0.000870546	4.001
TPX2	3.55521	6.07935	9.34018	1.08974e-05	0.000870546	3.99869
CPSF3	1.08869	8.20046	9.33798	1.09171e-05	0.000870546	3.99688
NR2F1	-2.36316	8.46531	-9.33598	1.0935e-05	0.000870546	3.99523
EPB41L4A-AS1	-1.60609	8.32135	-9.31386	1.11354e-05	0.000879859	3.97696
LOC100506834	-1.27779	4.46227	-9.31358	1.1138e-05	0.000879859	3.97673
SIGLEC1	1.68126	5.71604	9.30428	1.12236e-05	0.000883208	3.96903
LOC285812	2.47958	5.36751	9.29816	1.12802e-05	0.000884263	3.96397
AIFM1	1.70448	7.72353	9.28644	1.13896e-05	0.000889433	3.95425
NSA2	-1.20378	10.9907	-9.27474	1.15e-05	0.000894639	3.94454
DCBLD1	1.11099	5.15492	9.26375	1.16048e-05	0.00089937	3.93541
ARHGEF19	1.38554	6.22258	9.24815	1.17553e-05	0.000907598	3.92243
TUBA1C	1.33573	12.0517	9.21393	1.20931e-05	0.000930168	3.89389
ABCG2	-2.08696	5.52131	-9.20165	1.2217e-05	0.000935709	3.88362
STT3B	-1.25701	10.398	-9.19775	1.22566e-05	0.000935709	3.88036
ARMCX1	-2.27619	8.99181	-9.18605	1.23763e-05	0.000939584	3.87056
ZNF217	1.84809	7.9333	9.18383	1.23992e-05	0.000939584	3.8687
CEP55	3.28583	5.05253	9.17466	1.24942e-05	0.000943289	3.861
LOC283070	1.80461	6.51803	9.15616	1.26883e-05	0.00094699	3.84546
SMC4	1.76996	6.2828	9.1561	1.26889e-05	0.00094699	3.84541
KIF20A	2.97863	5.59041	9.15417	1.27093e-05	0.00094699	3.84378
MYH9	1.53218	7.74569	9.15237	1.27284e-05	0.00094699	3.84227
RBM38	1.8002	7.8075	9.09369	1.33687e-05	0.000987446	3.79274
LOC101927650	-3.0695	5.52958	-9.0883	1.34292e-05	0.000988351	3.78818
MLF2	1.39278	8.57963	9.07926	1.35315e-05	0.000988976	3.78052
HELQ	-1.19785	4.93087	-9.0695	1.36429e-05	0.000989471	3.77223
MOGS	1.44023	7.18916	9.06676	1.36743e-05	0.000989471	3.76991
PHF10	-1.28183	8.58553	-9.06275	1.37205e-05	0.000989471	3.76651
PBK	2.92992	4.8284	9.06153	1.37346e-05	0.000989471	3.76547
JAG2	2.30008	6.75552	9.04557	1.39203e-05	0.000991499	3.7519
MACC1	2.31756	4.85992	9.04357	1.39438e-05	0.000991499	3.7502
PGR	-2.39278	6.13434	-9.03153	1.4086e-05	0.000991499	3.73994
NRAS	1.27487	6.94821	9.02771	1.41315e-05	0.000991499	3.73668
EDNRA	-3.06386	6.99827	-9.02351	1.41816e-05	0.000991499	3.7331
L3MBTL3	-1.75607	6.61279	-9.02074	1.42148e-05	0.000991499	3.73074
PRRG4	1.48292	5.89449	9.0202	1.42213e-05	0.000991499	3.73028
PUS7	1.51086	7.30078	9.02013	1.42222e-05	0.000991499	3.73021
GSTM3	-1.82482	7.90041	-9.01907	1.42349e-05	0.000991499	3.72931
C1orf21	-1.10187	5.65702	-9.01803	1.42473e-05	0.000991499	3.72843
C2orf88	3.24952	6.72605	9.01362	1.43005e-05	0.000991828	3.72466
ZWINT	3.32103	6.88415	9.00699	1.43809e-05	0.000994031	3.719
KIF15	2.48568	5.06434	8.99503	1.45271e-05	0.00100075	3.70877
FLRT3	-1.89515	6.66377	-8.98901	1.46013e-05	0.00100232	3.70362
CD82	1.73173	6.88612	8.97604	1.47627e-05	0.00100681	3.6925
NR3C2	-3.3242	7.17178	-8.97199	1.48134e-05	0.00100692	3.68903
LSM2	1.18773	7.57363	8.93798	1.52476e-05	0.00102476	3.65979
KCNMB2	-2.46119	5.82128	-8.93764	1.5252e-05	0.00102476	3.65951
MX2	2.54525	7.27356	8.93603	1.52729e-05	0.00102476	3.65812
PRICKLE2	-1.43609	6.93831	-8.93578	1.52762e-05	0.00102476	3.6579
C8orf82	1.23928	8.02427	8.92474	1.54203e-05	0.00102769	3.64839
FKBP7	-2.40765	5.82057	-8.89999	1.57493e-05	0.00104045	3.62702
AUP1	1.11599	9.06308	8.88717	1.59227e-05	0.00104045	3.61593
SMC5	-1.29338	6.1879	-8.88672	1.59289e-05	0.00104045	3.61554
CDCA3	2.12933	5.87074	8.88481	1.59549e-05	0.00104045	3.61388
JAM3	-1.01726	5.25677	-8.88446	1.59596e-05	0.00104045	3.61358
DNAJC12	-1.85521	5.16623	-8.88386	1.59678e-05	0.00104045	3.61306
HEBP1	-1.11957	9.40862	-8.87244	1.61246e-05	0.00104536	3.60317
EIF3F	-1.05067	6.56697	-8.87037	1.61532e-05	0.00104536	3.60137
SMAD9	-1.69306	5.59126	-8.86724	1.61965e-05	0.00104536	3.59865
SERPINH1	1.23399	8.84351	8.86286	1.62574e-05	0.001046	3.59485
TFAP2A	1.62933	4.76803	8.8509	1.64249e-05	0.00105016	3.58447
TRIM17	1.58987	5.29083	8.83771	1.66119e-05	0.00105881	3.57299
RRM2	4.23741	6.04167	8.83276	1.66827e-05	0.00105897	3.56868
PALLD	-1.07879	6.96577	-8.82719	1.67628e-05	0.00105897	3.56382
TMED9	1.16042	9.31893	8.8235	1.68159e-05	0.00105897	3.56061
TMEM200A	-2.59068	6.9846	-8.82313	1.68213e-05	0.00105897	3.56029
RUVBL1	1.74607	7.48078	8.80653	1.70633e-05	0.00106412	3.54581
HJURP	2.58205	5.02762	8.80504	1.70853e-05	0.00106412	3.5445
PPP1R14B	1.70974	8.15461	8.80404	1.71e-05	0.00106412	3.54363
ST13	-1.73985	10.0945	-8.80218	1.71274e-05	0.00106412	3.542
LAMC1	1.20312	9.29735	8.7989	1.71759e-05	0.00106412	3.53913
PGM5-AS1	-1.80886	5.83615	-8.79624	1.72153e-05	0.00106412	3.53681
ARF5	1.2866	8.49069	8.78647	1.73609e-05	0.00106913	3.52826
NDNF	-3.52923	7.05996	-8.78177	1.74315e-05	0.00106913	3.52415
MMP7	5.08597	7.98629	8.77754	1.74953e-05	0.00106913	3.52044
LRCH2	-2.67818	5.39189	-8.7703	1.76051e-05	0.00107202	3.51409
CAPG	2.60055	7.2698	8.76058	1.77536e-05	0.00107786	3.50557
THEM6	1.80162	5.66944	8.75574	1.78281e-05	0.00107918	3.50132
IGBP1	-1.17202	9.85436	-8.74419	1.80072e-05	0.00108532	3.49117
RNF213	1.16007	6.8694	8.74159	1.80479e-05	0.00108532	3.48888
S100A4	4.43316	9.38046	8.73649	1.81279e-05	0.00108532	3.48439
PPP4C	1.19097	8.33152	8.73561	1.81417e-05	0.00108532	3.48362
BDH2	-1.60323	7.31956	-8.72969	1.82351e-05	0.00108697	3.4784
TCF15	1.48745	5.72116	8.72713	1.82756e-05	0.00108697	3.47615
BID	1.53285	6.26656	8.71988	1.8391e-05	0.00108872	3.46976
CD24	4.93191	8.51372	8.7186	1.84114e-05	0.00108872	3.46863
DARS2	1.44166	5.84518	8.69876	1.87316e-05	0.00110129	3.45112
TCEAL7	-3.45221	6.4692	-8.69135	1.88529e-05	0.00110269	3.44456
PDGFRL	-1.4763	7.50251	-8.68781	1.8911e-05	0.00110269	3.44143
FOXQ1	5.11651	8.41335	8.68182	1.90101e-05	0.00110269	3.43613
KIFC2	1.96461	6.67108	8.68117	1.90207e-05	0.00110269	3.43556
FXYD1	-1.946	7.79732	-8.67661	1.90966e-05	0.00110269	3.43151
KDSR	-1.06336	5.89145	-8.67648	1.90986e-05	0.00110269	3.4314
MGAT4B	1.79042	8.1935	8.67227	1.9169e-05	0.00110269	3.42767
CCDC167	1.41236	6.95271	8.66911	1.92219e-05	0.00110269	3.42487
PTAFR	1.29544	6.21882	8.668	1.92404e-05	0.00110269	3.42389
ASPM	1.65731	4.03299	8.66424	1.93036e-05	0.00110322	3.42055
CCNB2	1.42265	4.97005	8.6489	1.95641e-05	0.00110925	3.40693
OLFML1	-2.00713	8.04935	-8.64845	1.95719e-05	0.00110925	3.40653
CLUH	1.27092	8.24333	8.64384	1.96508e-05	0.00111065	3.40243
LOC100506098	2.58865	5.93103	8.62034	2.00593e-05	0.00113062	3.38151
PLS1	2.39215	5.11718	8.60463	2.03377e-05	0.00114316	3.36749
GPM6B	1.83493	6.00872	8.57966	2.07888e-05	0.00116531	3.34517
TEAD4	2.17346	6.19374	8.57606	2.08548e-05	0.00116582	3.34194
C15orf48	3.57543	5.56798	8.57086	2.09506e-05	0.00116798	3.33728
WARS	1.40531	8.00502	8.55825	2.11847e-05	0.00117783	3.32597
ST6GALNAC1	3.93577	5.87879	8.54136	2.15027e-05	0.00119102	3.3108
MST1R	1.14517	5.3371	8.53862	2.15549e-05	0.00119102	3.30833
WASF3	-2.25833	7.95623	-8.53643	2.15966e-05	0.00119102	3.30636
DNAJC5	1.17919	6.34991	8.52741	2.17695e-05	0.00119411	3.29824
NTN4	-2.18898	8.34921	-8.51507	2.20085e-05	0.00119656	3.28712
HDGF	1.90659	9.42207	8.51309	2.2047e-05	0.00119656	3.28534
SLC9B2	-1.11634	4.76174	-8.50948	2.21177e-05	0.00119656	3.28208
GSTP1	1.53166	10.0018	8.50503	2.22051e-05	0.00119656	3.27806
EMILIN1	-1.15254	7.70569	-8.50384	2.22285e-05	0.00119656	3.27699
MCM4	1.20784	5.16415	8.50247	2.22555e-05	0.00119656	3.27575
BZW2	1.43663	9.64922	8.50112	2.22821e-05	0.00119656	3.27454
LRRC8D	1.53594	8.02145	8.4887	2.2529e-05	0.00120351	3.26331
XPO5	1.2766	6.82845	8.46994	2.29076e-05	0.00121085	3.24632
LRRTM1	2.79314	5.45799	8.46982	2.291e-05	0.00121085	3.24622
SARAF	-1.33475	11.2108	-8.46952	2.29162e-05	0.00121085	3.24594
LOC100506388	-2.93278	6.38684	-8.46755	2.29563e-05	0.00121085	3.24416
FMNL2	-1.0661	5.73328	-8.46726	2.29623e-05	0.00121085	3.24389
PHYH	-1.55897	8.61265	-8.45681	2.31768e-05	0.00121882	3.23441
ST6GAL1	1.1538	5.2372	8.45123	2.32923e-05	0.00121882	3.22935
SIMC1	-1.48146	8.69318	-8.4473	2.3374e-05	0.00121998	3.22578
MCUR1	1.63089	6.74813	8.4435	2.34532e-05	0.001221	3.22233
KIF11	2.53306	4.28667	8.43662	2.35975e-05	0.00122539	3.21607
RGS19	1.66745	6.57487	8.43278	2.36786e-05	0.00122649	3.21257
NCBP2-AS2	1.27984	7.96349	8.41546	2.40477e-05	0.00124246	3.1968
CLDN3	4.36343	7.5581	8.41039	2.4157e-05	0.00124443	3.19217
GAPDH	1.29412	12.5663	8.40501	2.42735e-05	0.00124443	3.18726
CD47	1.78426	8.2667	8.4036	2.43041e-05	0.00124443	3.18598
NFE2L3	1.22264	4.45395	8.40246	2.4329e-05	0.00124443	3.18493
IFI44	1.79607	7.13715	8.39816	2.44227e-05	0.0012461	3.18101
CDK1	2.14027	5.07513	8.3935	2.45248e-05	0.0012482	3.17675
B3GNT3	1.42534	6.21674	8.38032	2.48162e-05	0.00125784	3.1647
C2	1.88289	5.33658	8.37263	2.49882e-05	0.00125784	3.15765
PVRL4	1.4249	5.94462	8.37171	2.50087e-05	0.00125784	3.15681
TXNL1	-1.63867	7.10978	-8.36903	2.5069e-05	0.00125784	3.15436
BNIP3L	-1.53013	9.48054	-8.36719	2.51106e-05	0.00125784	3.15266
ACADL	-3.21843	5.46168	-8.36569	2.51444e-05	0.00125784	3.15129
KLK7	4.19489	7.49707	8.35424	2.54044e-05	0.00125963	3.14079
TCERG1L	-2.92642	5.23037	-8.35336	2.54246e-05	0.00125963	3.13998
HS3ST1	-1.07366	5.3633	-8.34926	2.55184e-05	0.00125963	3.13621
LOC728392	-2.26205	8.33774	-8.34564	2.56017e-05	0.00125963	3.13289
PEG3	-3.64257	9.40495	-8.34442	2.56299e-05	0.00125963	3.13176
PRKCI	1.73523	7.60415	8.34027	2.57257e-05	0.00125963	3.12796
MFAP4	-1.94105	7.15369	-8.33738	2.57927e-05	0.00125963	3.1253
LIX1L	-1.09346	6.29467	-8.33724	2.5796e-05	0.00125963	3.12517
NDC80	2.86131	5.32559	8.30986	2.64409e-05	0.0012873	3.09995
LYN	1.83787	6.88771	8.30269	2.66127e-05	0.0012873	3.09333
WRB	-1.35361	8.68183	-8.30263	2.66142e-05	0.0012873	3.09327
KLHL14	1.77585	4.90035	8.29821	2.67206e-05	0.00128939	3.0892
HOXC6	-2.20337	9.02506	-8.28381	2.70712e-05	0.00129783	3.07588
HMOX1	-2.02723	8.05593	-8.28321	2.70858e-05	0.00129783	3.07532
PRSS2	1.70684	5.02636	8.27923	2.71835e-05	0.00129947	3.07164
FAM150B	-4.14079	7.02152	-8.27478	2.72934e-05	0.00130169	3.06752
RHOBTB1	-1.17002	6.57127	-8.26144	2.76254e-05	0.00131446	3.05516
CSDC2	-1.92792	7.53189	-8.25277	2.78437e-05	0.00132177	3.04711
ASAP2	1.40634	8.33537	8.24926	2.79326e-05	0.00132292	3.04385
PCAT19	-1.46206	5.23881	-8.23802	2.82195e-05	0.00133035	3.0334
CENPK	2.12909	4.12245	8.23226	2.83676e-05	0.00133203	3.02805
CLIC1	1.0407	10.3629	8.22945	2.84404e-05	0.00133203	3.02543
KIAA0101	3.211	5.88396	8.22906	2.84506e-05	0.00133203	3.02506
ELAVL2	-1.20559	3.83597	-8.22314	2.86043e-05	0.00133313	3.01955
DPY19L2	-1.98075	5.63054	-8.21922	2.87064e-05	0.00133485	3.01591
ITPA	1.06495	8.48002	8.21524	2.88109e-05	0.00133504	3.01219
ORMDL2	2.03057	7.57493	8.21409	2.88411e-05	0.00133504	3.01112
INTU	-1.46166	6.49219	-8.20491	2.90834e-05	0.00133733	3.00256
SPARCL1	-1.6237	10.8486	-8.1997	2.92221e-05	0.00134055	2.99769
ANO4	-1.26009	4.40934	-8.18463	2.96272e-05	0.00135609	2.98361
IL4I1	3.01747	5.93291	8.18166	2.97076e-05	0.00135674	2.98083
THBS3	1.09736	8.12481	8.16434	3.01822e-05	0.00136727	2.96461
ARRB2	1.28149	6.28728	8.16434	3.01824e-05	0.00136727	2.9646
ESRP1	4.16342	7.38305	8.1635	3.02056e-05	0.00136727	2.96382
CLMN	1.49052	5.47534	8.15391	3.04723e-05	0.00137288	2.95482
FXYD3	2.7655	6.84695	8.15051	3.05675e-05	0.00137288	2.95162
UNC5B-AS1	1.39758	4.97036	8.14871	3.0618e-05	0.00137288	2.94993
HAGLR	1.30778	4.99926	8.14544	3.07099e-05	0.00137288	2.94686
DLGAP5	3.44033	4.75688	8.14466	3.0732e-05	0.00137288	2.94613
FBXL5	-1.14945	8.45399	-8.13825	3.09133e-05	0.00137797	2.9401
MYRIP	-1.23218	5.05559	-8.12649	3.1249e-05	0.00138758	2.92904
KCNT2	-2.91785	6.88814	-8.12416	3.13162e-05	0.00138758	2.92684
MAPK13	2.26914	5.81402	8.12347	3.13361e-05	0.00138758	2.92619
TRIM11	1.00287	5.77126	8.12125	3.14002e-05	0.00138758	2.9241
NQO1	2.30077	6.68533	8.09823	3.20728e-05	0.00140516	2.90239
TSTA3	1.95986	8.14609	8.07855	3.26607e-05	0.00142267	2.88378
RTKN	1.19492	5.54869	8.07677	3.27143e-05	0.00142267	2.88209
C3orf70	-1.6895	4.98633	-8.07557	3.27507e-05	0.00142267	2.88096
NDUFB9	1.53618	11.1902	8.07112	3.28855e-05	0.00142275	2.87674
RASSF10	2.30682	5.17052	8.07093	3.28915e-05	0.00142275	2.87656
ARHGAP39	1.11998	5.27913	8.06243	3.3151e-05	0.00143061	2.8685
UBXN8	-1.18078	8.23986	-8.06041	3.32131e-05	0.00143061	2.86658
TDRD3	-1.03721	6.62716	-8.05434	3.34e-05	0.00143373	2.86083
HSPB6	-1.38683	5.69293	-8.05352	3.34256e-05	0.00143373	2.86005
RHOBTB3	-2.30261	6.81037	-8.0306	3.41435e-05	0.00146146	2.83826
ALAS1	1.13733	7.0557	8.02293	3.43873e-05	0.00146519	2.83096
TMEM38B	-1.94607	5.7811	-8.02261	3.43977e-05	0.00146519	2.83065
GRHL1	1.37608	4.31712	8.01878	3.45202e-05	0.00146519	2.827
PON3	-2.54285	7.43313	-8.0173	3.45677e-05	0.00146519	2.82559
TES	1.53469	6.0381	8.01664	3.45889e-05	0.00146519	2.82497
CDKN3	2.5375	5.21485	8.00113	3.50916e-05	0.00148337	2.81016
RUNDC3B	-2.94888	5.64487	-7.99895	3.5163e-05	0.00148337	2.80808
MEF2C	-1.63947	6.8902	-7.98866	3.55014e-05	0.00149298	2.79825
RNF43	1.9684	6.22014	7.98759	3.55368e-05	0.00149298	2.79723
XXYLT1	1.61028	6.30847	7.9806	3.57693e-05	0.0014966	2.79054
TUBA1B	1.02944	10.6473	7.96875	3.61671e-05	0.00150617	2.77919
CYP11A1	-2.70182	6.42734	-7.96722	3.62188e-05	0.00150617	2.77772
DCTPP1	1.16271	8.4022	7.95047	3.67902e-05	0.00151845	2.76166
FAM195A	1.66583	7.70486	7.94855	3.68564e-05	0.00151845	2.75981
EPDR1	-1.52669	8.04434	-7.94591	3.69476e-05	0.00151845	2.75727
PAPD5	-1.25133	7.42985	-7.94557	3.69593e-05	0.00151845	2.75695
ABCA8	-1.53273	5.26971	-7.94303	3.70475e-05	0.00151902	2.7545
TFPI	-1.56204	5.02839	-7.93225	3.74233e-05	0.00153136	2.74414
ITGB8	1.77421	6.06216	7.92619	3.76366e-05	0.00153702	2.7383
HEPH	-1.11763	5.53984	-7.91759	3.79414e-05	0.00153869	2.73002
PRSS8	3.63969	6.60112	7.91714	3.79574e-05	0.00153869	2.72958
MOSPD1	-1.20707	6.34728	-7.91643	3.79827e-05	0.00153869	2.7289
NEGR1	-1.37561	3.897	-7.90899	3.82491e-05	0.00154121	2.72172
CCNB1	2.44102	5.81152	7.9085	3.82666e-05	0.00154121	2.72125
TRIP13	2.41338	6.2062	7.90516	3.83871e-05	0.00154303	2.71802
DAG1	1.21535	7.09897	7.90067	3.85495e-05	0.00154652	2.71368
SLC39A11	2.05581	6.74802	7.89561	3.87334e-05	0.00154794	2.7088
BTG3	1.24728	6.42498	7.89446	3.87751e-05	0.00154794	2.70769
LOC100506990	-1.26427	8.13767	-7.89345	3.8812e-05	0.00154794	2.70671
ETV6	1.21849	6.21984	7.88884	3.8981e-05	0.00155165	2.70225
CCDC68	-3.21804	6.14875	-7.88383	3.91652e-05	0.00155295	2.69741
ANKRD12	-1.38648	6.00466	-7.87673	3.9428e-05	0.00155307	2.69053
SYNE4	2.90589	5.78184	7.87366	3.95422e-05	0.00155307	2.68756
DENND5B	-1.61231	5.33211	-7.87217	3.95979e-05	0.00155307	2.68612
CAMSAP3	1.67026	4.92547	7.87053	3.96593e-05	0.00155307	2.68453
HN1	2.05829	7.42316	7.86765	3.9767e-05	0.00155307	2.68174
AOC1	2.52277	5.10808	7.86712	3.97869e-05	0.00155307	2.68122
TWIST2	-1.31285	4.90259	-7.86588	3.98333e-05	0.00155307	2.68003
BSPRY	2.59188	5.19378	7.8654	3.98515e-05	0.00155307	2.67956
CDCA5	2.32541	6.07481	7.85466	4.02576e-05	0.00155931	2.66914
CHN2	-1.43672	5.96958	-7.85282	4.03276e-05	0.00155931	2.66735
DPY19L2P2	-2.76787	5.70163	-7.85213	4.03541e-05	0.00155931	2.66668
HMMR	2.13877	4.54337	7.85111	4.03927e-05	0.00155931	2.66569
MGST1	2.34778	5.71226	7.83914	4.08527e-05	0.0015741	2.65405
PRAME	3.41776	7.144	7.82004	4.15981e-05	0.00159558	2.63546
PPIF	1.70809	7.59558	7.81887	4.16441e-05	0.00159558	2.63432
FOXM1	2.81333	5.95834	7.81232	4.19039e-05	0.00159756	2.62793
ZDHHC8P1	-3.18991	7.33271	-7.81088	4.19611e-05	0.00159756	2.62653
IPO4	1.79407	7.55064	7.80782	4.20828e-05	0.00159756	2.62355
NFIC	-1.00699	7.53336	-7.80062	4.23715e-05	0.00160541	2.61652
GFOD1	1.19491	5.12558	7.79667	4.25308e-05	0.00160847	2.61266
HSPG2	1.17527	6.83884	7.78516	4.2999e-05	0.00162317	2.60139
GNB5	-1.25302	5.88666	-7.77241	4.35237e-05	0.00163995	2.58892
HSPA4L	-1.35971	4.18117	-7.7658	4.37988e-05	0.00164426	2.58243
MAP3K5	-2.32293	8.45102	-7.76238	4.39416e-05	0.00164588	2.57908
PNPT1	1.53087	7.85783	7.75901	4.40832e-05	0.00164588	2.57577
SPNS1	1.40445	6.92918	7.75196	4.43807e-05	0.00165096	2.56885
FAM13B	-1.58367	8.091	-7.74954	4.44834e-05	0.00165175	2.56647
KCNMB4	-1.16392	5.49576	-7.7475	4.45699e-05	0.00165175	2.56447
KCNJ8	-2.0233	6.47965	-7.74576	4.46441e-05	0.00165175	2.56276
LRRC49	-2.21615	6.77862	-7.74132	4.48339e-05	0.00165374	2.55839
TNNI3	1.77228	4.65414	7.7397	4.49032e-05	0.00165374	2.5568
TM9SF4	1.09476	6.95802	7.73291	4.51957e-05	0.00165383	2.55012
ZFPM2	-2.15314	8.66629	-7.73197	4.52364e-05	0.00165383	2.54919
SFMBT1	1.27798	5.2458	7.73162	4.52513e-05	0.00165383	2.54886
PARP14	1.03116	6.02149	7.72006	4.5755e-05	0.00166372	2.53746
SDF2L1	2.0672	7.53562	7.71933	4.57868e-05	0.00166372	2.53674
GADD45G	-2.58222	6.17214	-7.71502	4.5976e-05	0.00166372	2.5325
FGF13	-2.50323	6.39731	-7.71392	4.60247e-05	0.00166372	2.53141
DTL	2.36464	5.03519	7.7109	4.61582e-05	0.0016656	2.52843
PTP4A3	1.85258	6.55435	7.70205	4.65514e-05	0.00167637	2.51969
GGCT	1.44431	9.49895	7.69884	4.66949e-05	0.00167637	2.51652
ARF3	1.33272	8.3147	7.69867	4.67025e-05	0.00167637	2.51635
ARMCX4	-1.36389	4.98342	-7.69484	4.68744e-05	0.0016796	2.51257
SUSD2	1.90118	6.04801	7.68259	4.74293e-05	0.00169651	2.50045
ZNF165	1.7319	5.28877	7.67558	4.77499e-05	0.001705	2.49351
TMEM147	1.26511	9.48782	7.67087	4.79668e-05	0.00170512	2.48884
CCDC178	-1.74743	5.39063	-7.67065	4.79771e-05	0.00170512	2.48862
UBALD2	1.46686	7.12785	7.66971	4.80204e-05	0.00170512	2.48769
RARRES2	-1.67234	9.79583	-7.64588	4.91355e-05	0.00173032	2.46404
IGFBP5	-2.13089	7.28568	-7.6421	4.9315e-05	0.00173365	2.46028
ALS2CL	1.37817	6.52826	7.63977	4.94263e-05	0.00173458	2.45796
CHMP4C	3.72822	6.29484	7.63367	4.97183e-05	0.00174184	2.45189
PTTG1	3.17652	7.63874	7.63037	4.9877e-05	0.00174349	2.4486
FAM213B	2.06863	7.30402	7.62915	4.99358e-05	0.00174349	2.44739
DYNLT3	-1.16556	8.67087	-7.62624	5.00767e-05	0.00174543	2.44448
PRC1	2.89467	6.06321	7.61911	5.0423e-05	0.00175234	2.43738
PLBD2	-1.15117	6.70475	-7.61863	5.04461e-05	0.00175234	2.4369
ANK2	-1.72148	5.85659	-7.61382	5.06818e-05	0.00175754	2.4321
ATAD3C	1.11089	5.44998	7.60906	5.09155e-05	0.00176051	2.42736
DLG2	-1.50856	4.5798	-7.60832	5.0952e-05	0.00176051	2.42662
PLXDC1	-1.33157	6.11785	-7.60683	5.10256e-05	0.00176051	2.42513
WFS1	-1.50457	7.59738	-7.59938	5.13952e-05	0.00176676	2.41769
S100A14	2.91385	6.64978	7.59734	5.14969e-05	0.00176676	2.41565
ADA	1.18335	5.52411	7.59661	5.15336e-05	0.00176676	2.41492
FBXW9	1.50977	6.39021	7.59624	5.1552e-05	0.00176676	2.41455
GABRG1	-1.55167	3.95479	-7.57874	5.24349e-05	0.00179401	2.39704
IGFBP4	-1.39853	10.5795	-7.56602	5.30874e-05	0.00181097	2.38428
PSMB8	1.19396	8.23283	7.56562	5.31077e-05	0.00181097	2.38389
NXN	2.01278	9.45171	7.55767	5.35202e-05	0.001822	2.3759
SYNGR1	-1.59046	7.11045	-7.54522	5.41735e-05	0.00183508	2.36339
TCF21	-2.36085	7.34759	-7.54218	5.43338e-05	0.00183747	2.36034
IDH2	2.09674	6.63933	7.53812	5.45494e-05	0.00184156	2.35625
ERBB3	1.68928	5.49268	7.53652	5.46347e-05	0.00184156	2.35464
BAMBI	-3.62351	8.04553	-7.53004	5.49813e-05	0.00185019	2.34811
AKT3	-1.66477	5.71721	-7.51919	5.55671e-05	0.00186021	2.33718
KGFLP2	-1.99621	5.40906	-7.5178	5.56427e-05	0.00186021	2.33577
NR1H4	-2.26309	4.88001	-7.51405	5.58467e-05	0.00186398	2.332
SAT2	-1.60379	8.9634	-7.50944	5.60992e-05	0.00186936	2.32734
LINC00672	-1.70245	5.71906	-7.50211	5.65029e-05	0.00187262	2.31994
ZNF275	-1.42068	9.38827	-7.50103	5.6563e-05	0.00187262	2.31884
S100A9	2.45496	7.50741	7.49703	5.67846e-05	0.00187669	2.31481
ESRRA	1.00736	6.49052	7.49122	5.71087e-05	0.00187751	2.30893
EHBP1	-1.78817	7.72511	-7.4908	5.71324e-05	0.00187751	2.3085
HTR3A	2.41392	5.4399	7.4885	5.72612e-05	0.00187751	2.30618
CMYA5	-1.61265	5.82143	-7.48607	5.73978e-05	0.00187897	2.30372
RTN3	1.05424	8.94385	7.47773	5.78695e-05	0.0018812	2.29527
RBMS3	-1.59646	5.75402	-7.47674	5.79256e-05	0.0018812	2.29427
KIAA1522	1.30277	8.54951	7.47287	5.81464e-05	0.0018824	2.29034
KRT23	3.69942	5.7718	7.47049	5.82822e-05	0.00188288	2.28793
E2F3	1.70604	7.12675	7.46622	5.85271e-05	0.00188577	2.2836
TGFBR3	-2.36847	9.15837	-7.45392	5.92392e-05	0.00190071	2.27111
UCP2	3.66207	8.02081	7.45341	5.92694e-05	0.00190071	2.27058
PUF60	1.64251	9.49352	7.44858	5.95514e-05	0.00190676	2.26568
RSAD2	1.81985	6.57237	7.44438	5.97982e-05	0.00190761	2.26141
RPS27	-1.13571	10.0434	-7.43956	6.00831e-05	0.00191131	2.2565
TPI1	1.34538	8.17712	7.43667	6.0254e-05	0.00191131	2.25356
PPM1G	1.0901	7.80718	7.42924	6.06974e-05	0.00191942	2.24599
AOX1	-2.54354	7.72049	-7.42708	6.08267e-05	0.00191942	2.24379
LINC00621	1.69979	8.81692	7.42611	6.08848e-05	0.00191942	2.2428
ENG	-1.09094	6.91228	-7.41811	6.13676e-05	0.00193166	2.23464
KCNQ4	1.00183	4.61239	7.41274	6.16936e-05	0.00193894	2.22917
PPAPDC3	-1.35844	5.86517	-7.40584	6.21162e-05	0.00194025	2.22212
UHRF1	2.21071	6.31978	7.4045	6.21986e-05	0.00194025	2.22074
PLCXD3	-2.70258	7.72745	-7.40176	6.23669e-05	0.00194025	2.21795
TMBIM6	1.01104	9.95814	7.40153	6.23813e-05	0.00194025	2.21771
ANLN	2.29265	4.76668	7.40124	6.23991e-05	0.00194025	2.21742
PLCL1	-1.28792	4.33614	-7.39917	6.25269e-05	0.00194128	2.2153
TCF4	-1.8374	8.75637	-7.39576	6.27388e-05	0.00194283	2.21181
ACTN1	1.19865	8.20783	7.3953	6.2767e-05	0.00194283	2.21134
PRR7	1.29187	5.04069	7.38955	6.31252e-05	0.00194803	2.20546
LAMA2	-2.24301	6.53327	-7.37884	6.37989e-05	0.00196463	2.19449
RPS6KA1	1.97688	5.93512	7.37795	6.38554e-05	0.00196463	2.19357
MICU3	-2.76208	5.18311	-7.37407	6.41011e-05	0.00196923	2.1896
HAND2-AS1	-2.35969	5.32608	-7.36836	6.44655e-05	0.00197746	2.18374
GLT8D2	-1.95166	7.90408	-7.36534	6.46593e-05	0.00197826	2.18064
FAM13C	-1.48891	4.75053	-7.36343	6.47816e-05	0.00197826	2.17869
SQLE	1.07031	5.66294	7.33968	6.633e-05	0.00201373	2.15426
METTL7B	2.87735	5.49631	7.33957	6.6337e-05	0.00201373	2.15415
SYTL4	-2.16619	6.67799	-7.33747	6.6476e-05	0.00201496	2.15199
BMPER	-1.62232	4.06353	-7.33001	6.69714e-05	0.00202398	2.14431
VIT	-3.15356	7.21168	-7.32044	6.76134e-05	0.0020351	2.13444
MCM2	2.14542	7.67635	7.3163	6.78936e-05	0.0020351	2.13016
PPP5D1	-1.0339	3.93634	-7.31609	6.79074e-05	0.0020351	2.12995
POLQ	1.62799	4.90897	7.31389	6.80573e-05	0.00203575	2.12767
RTP4	2.7241	7.28626	7.29989	6.90156e-05	0.0020554	2.11321
TMC6	1.92934	5.97786	7.29271	6.95125e-05	0.00206719	2.10578
BLM	1.96608	5.55929	7.29111	6.96241e-05	0.0020675	2.10412
TARBP1	2.3195	8.14465	7.28731	6.98893e-05	0.00207237	2.10019
NAP1L2	-2.74276	5.03335	-7.2855	7.00162e-05	0.00207313	2.09831
LIMCH1	-2.11554	7.30263	-7.28387	7.01303e-05	0.00207351	2.09663
RPL23AP32	-1.66722	8.03513	-7.2732	7.08839e-05	0.00208975	2.08557
PSD3	-2.75985	7.27919	-7.26624	7.13807e-05	0.00209332	2.07834
CORO1B	1.00579	6.64071	7.26504	7.14664e-05	0.00209332	2.0771
LOC101928419	-1.70503	5.97801	-7.26434	7.15165e-05	0.00209332	2.07637
OR7E37P	1.87931	7.37202	7.2624	7.16563e-05	0.00209441	2.07435
LMNB2	1.33702	6.40135	7.26014	7.1819e-05	0.00209617	2.072
SLC44A2	2.08468	7.45026	7.25322	7.23193e-05	0.00210777	2.06481
C1orf112	1.50244	4.73181	7.24954	7.2587e-05	0.00211256	2.06099
HLA-DRB1 /// HLA-DRB1	2.17298	10.962	7.24609	7.28391e-05	0.00211445	2.0574
GNAI1	-2.39369	7.30192	-7.24583	7.28584e-05	0.00211445	2.05713
ATP10D	-1.8795	7.04081	-7.24134	7.31879e-05	0.00211919	2.05246
PRSS21	3.75991	6.20313	7.2395	7.3324e-05	0.00211919	2.05053
BCL11A	2.24872	6.6572	7.23798	7.34362e-05	0.00211919	2.04895
ME1	-1.55421	5.39543	-7.23308	7.37988e-05	0.00212665	2.04385
LPAR3	1.91646	6.43809	7.22488	7.44105e-05	0.00213826	2.0353
LOC102723845	-1.79254	4.69338	-7.22028	7.47562e-05	0.00214371	2.0305
CENPC	-1.06965	5.83992	-7.21957	7.48097e-05	0.00214371	2.02976
FRAT2	1.20069	6.8169	7.21695	7.50076e-05	0.00214637	2.02703
SYNPO2	-1.47219	6.36797	-7.215	7.51557e-05	0.00214672	2.02498
NUP210	1.35397	5.92243	7.21369	7.5255e-05	0.00214672	2.02362
PKD2	-1.50948	8.03304	-7.21213	7.53734e-05	0.00214672	2.02199
CMPK2	1.68395	7.53747	7.21078	7.5476e-05	0.00214672	2.02058
PROX1	-1.70249	5.4838	-7.20794	7.56926e-05	0.00214672	2.01761
ERO1LB	-1.14183	4.5562	-7.20728	7.57432e-05	0.00214672	2.01692
TRIM29	1.76552	5.66981	7.2047	7.5941e-05	0.00214672	2.01422
SMARCD2	1.4866	7.97188	7.20446	7.59593e-05	0.00214672	2.01397
ALKBH6	1.27537	7.11956	7.2033	7.60483e-05	0.00214672	2.01276
ANKMY2	-1.27256	8.35715	-7.20303	7.60692e-05	0.00214672	2.01247
SLC25A5	1.00204	10.4175	7.20091	7.62315e-05	0.00214834	2.01026
VLDLR	-2.86865	8.83079	-7.19766	7.64825e-05	0.00215245	2.00686
ARHGAP10	-1.02251	6.47781	-7.19485	7.67003e-05	0.00215266	2.00391
CFL2	-1.47759	6.94767	-7.18501	7.74665e-05	0.0021707	1.99362
MAP4K2	1.3626	4.76109	7.18388	7.75553e-05	0.0021707	1.99243
MECOM	2.04543	5.20761	7.1791	7.79315e-05	0.00217688	1.98742
LOC100506014	-1.10189	5.94797	-7.17837	7.79888e-05	0.00217688	1.98666
SELM	-1.45142	9.05553	-7.17388	7.83447e-05	0.00218317	1.98194
COL4A6	-1.42023	4.49845	-7.17074	7.85943e-05	0.0021832	1.97864
ADAP2	1.29766	6.71734	7.15989	7.94632e-05	0.00220002	1.96725
DNAJB11	1.66419	8.5113	7.15716	7.96838e-05	0.00220291	1.96438
TRIP6	1.06448	8.9074	7.15427	7.99174e-05	0.00220291	1.96135
STARD7	1.18895	9.84597	7.154	7.99397e-05	0.00220291	1.96106
RAB8A	1.02535	8.63024	7.15196	8.01057e-05	0.00220291	1.95891
KLHDC8B	-1.50457	8.89363	-7.14761	8.04603e-05	0.00220932	1.95433
ORC6	1.11193	7.62475	7.14645	8.05547e-05	0.00220932	1.95311
ANGPTL2	-1.58104	6.39972	-7.14488	8.06835e-05	0.00220988	1.95146
GPSM2	1.03123	4.87538	7.13872	8.11899e-05	0.00221782	1.94498
HNMT	-1.15305	5.81586	-7.13724	8.13124e-05	0.0022182	1.94341
RFX5	1.77593	7.32262	7.13281	8.16791e-05	0.00222228	1.93875
STC2	1.52368	5.1816	7.12768	8.2107e-05	0.00223096	1.93333
LAMP3	3.48694	5.58673	7.11812	8.29102e-05	0.00224384	1.92324
ACTN4	1.45113	9.60067	7.11276	8.3364e-05	0.00225017	1.91758
SMARCE1	-1.04482	7.30086	-7.10855	8.37231e-05	0.00225688	1.91313
INHBB	2.73573	7.20746	7.10612	8.39307e-05	0.0022595	1.91056
SNX21	-1.44253	7.11102	-7.08302	8.59337e-05	0.00230433	1.8861
PLD5	-1.72561	4.00015	-7.06809	8.72573e-05	0.00232459	1.87025
NAV3	-1.88587	5.15107	-7.06552	8.74874e-05	0.0023266	1.86752
S100A11	2.51066	9.29519	7.06455	8.75737e-05	0.0023266	1.8665
TMEM8A	1.24751	6.3132	7.06344	8.76739e-05	0.0023266	1.86531
BEX5	-3.07761	7.31941	-7.05412	8.85158e-05	0.00233584	1.8554
ABCA5	-1.5927	6.05776	-7.05311	8.86071e-05	0.00233584	1.85433
DPYSL2	-1.33611	10.5327	-7.05201	8.8707e-05	0.00233584	1.85316
STON2	1.51501	4.81492	7.0445	8.93938e-05	0.00233935	1.84516
PBX3	-2.265	8.64486	-7.04445	8.93979e-05	0.00233935	1.84511
TSPAN1	2.06103	6.47981	7.0443	8.9412e-05	0.00233935	1.84495
HAGLROS	1.11502	5.21834	7.04117	8.96999e-05	0.00234388	1.84161
ADAMTS3	-1.78825	5.0603	-7.02115	9.15653e-05	0.0023762	1.82026
RNF157-AS1	2.75721	5.48008	7.01522	9.21254e-05	0.0023762	1.81393
HACE1	-1.38839	6.31527	-7.01446	9.21978e-05	0.0023762	1.81311
MIR100HG	-1.86396	8.67737	-7.01303	9.23335e-05	0.0023762	1.81159
CBS	1.68529	7.45043	7.01281	9.2355e-05	0.0023762	1.81135
POC1A	1.0859	5.26296	7.01275	9.23607e-05	0.0023762	1.81128
NBL1	-1.7098	9.47299	-7.01063	9.25625e-05	0.0023762	1.80902
ERO1L	1.76215	6.61629	7.00114	9.34725e-05	0.0023933	1.79886
ZNF467	1.0535	5.49359	6.99761	9.38138e-05	0.0023933	1.79508
IGFBP6	-2.58854	8.47155	-6.9956	9.40077e-05	0.00239527	1.79294
KDF1	1.47461	5.34301	6.98123	9.54143e-05	0.00242241	1.77752
ZC3H6	-1.23567	6.40152	-6.98001	9.5534e-05	0.00242241	1.77622
COL23A1	1.76662	5.4396	6.97988	9.55467e-05	0.00242241	1.77608
SLC5A6	1.36217	7.49339	6.97213	9.63157e-05	0.00243587	1.76776
SMPDL3B	1.42626	5.9663	6.96893	9.66352e-05	0.00244093	1.76432
TMEM205	1.22688	8.99254	6.96735	9.67936e-05	0.00244192	1.76262
WDFY3-AS2	-2.2743	5.0508	-6.96564	9.6965e-05	0.00244323	1.76079
NCAPG	2.14156	4.85592	6.96375	9.71549e-05	0.00244501	1.75875
MRPL14	1.44846	8.74728	6.96226	9.73046e-05	0.00244576	1.75716
WFDC2	3.77838	7.10097	6.95868	9.76669e-05	0.00244885	1.7533
SPP1	2.9233	5.50421	6.9541	9.81309e-05	0.00245639	1.74838
SLC34A2	3.06268	7.32958	6.94059	9.9516e-05	0.002477	1.73382
SYT17	2.59593	6.04071	6.93105	0.000100507	0.00249559	1.72353
COMTD1	1.07693	6.88062	6.92783	0.000100844	0.00250094	1.72005
CCDC64B	1.61449	6.51067	6.92323	0.000101327	0.00250129	1.71509
SEPP1	-1.29611	8.56079	-6.92251	0.000101403	0.00250129	1.71431
CDC123	1.12373	8.5611	6.9225	0.000101404	0.00250129	1.7143
CNTN1	-1.70461	5.16768	-6.91795	0.000101885	0.0025085	1.70939
TMEM159	-1.41245	6.5542	-6.91608	0.000102084	0.00251038	1.70736
LAP3	1.20951	9.06831	6.90771	0.000102978	0.00252629	1.69831
MAGEL2	-1.7841	5.41695	-6.90648	0.00010311	0.0025265	1.69697
TOP2A	2.48458	4.59495	6.90527	0.000103239	0.00252658	1.69567
HMGA1	1.9919	6.68792	6.90192	0.000103601	0.00252944	1.69204
CDCA4	1.29189	7.25193	6.90071	0.000103732	0.00252962	1.69073
KIF18B	2.59005	6.10708	6.89734	0.000104096	0.00253246	1.68709
TK1	2.35843	5.97644	6.89151	0.000104732	0.00253888	1.68076
GKAP1	-1.08916	5.95552	-6.88855	0.000105055	0.00254371	1.67755
CEBPA	1.60379	6.09169	6.88547	0.000105393	0.00254887	1.67422
COX7A1	-2.01626	8.00998	-6.88351	0.00010561	0.00255109	1.67209
C10orf32	-1.25034	7.95576	-6.88234	0.000105739	0.00255121	1.67081
PLOD3	1.0324	8.18773	6.87681	0.000106351	0.00256296	1.66481
RFXANK	1.95951	8.8126	6.87257	0.000106824	0.00257132	1.6602
COL4A2	1.49493	7.99443	6.86277	0.000107925	0.00258565	1.64955
EPT1	1.1783	5.48496	6.85769	0.0001085	0.00259515	1.64402
MIR142	1.19956	5.26678	6.85591	0.000108702	0.00259515	1.64209
SAC3D1	1.7154	7.1814	6.85276	0.000109061	0.0026007	1.63866
SLC38A1	1.411	7.20175	6.84778	0.000109632	0.00260604	1.63324
TCEAL1	-1.66857	8.10907	-6.84774	0.000109637	0.00260604	1.63319
TUSC3	-1.25735	6.5931	-6.84709	0.000109711	0.00260604	1.63249
ATP6V1B1	2.23623	5.82109	6.83172	0.000111496	0.00263869	1.61571
CEP57	-1.11826	7.27811	-6.83164	0.000111505	0.00263869	1.61563
ARMCX3	-1.13368	8.42249	-6.83051	0.000111638	0.00263869	1.61439
SLC16A4	-1.97265	6.11944	-6.83009	0.000111687	0.00263869	1.61394
ABLIM1	-1.40341	8.87537	-6.82478	0.000112311	0.00264734	1.60814
ACKR1	1.70874	5.3471	6.82071	0.000112794	0.00265565	1.60368
UGT8	1.57827	4.33366	6.81719	0.000113211	0.00266156	1.59984
CLEC2B	-2.28472	6.98715	-6.8164	0.000113305	0.00266156	1.59898
DDIAS	1.24397	5.06147	6.79809	0.000115511	0.00270325	1.57894
ALDH1A1	-2.89602	8.70395	-6.79794	0.000115529	0.00270325	1.57877
GALNT6	3.41671	6.66837	6.79729	0.000115608	0.00270325	1.57806
KLHDC1	-1.19434	4.83663	-6.79039	0.000116452	0.00271988	1.57049
C6orf136	1.76747	6.73372	6.78692	0.00011688	0.00272675	1.56668
PCDH9	-1.95471	4.53706	-6.78115	0.000117593	0.00274027	1.56035
C11orf80	1.16085	6.42898	6.77668	0.00011815	0.00274746	1.55544
UBQLN2	-1.28335	7.45609	-6.7753	0.000118322	0.00274746	1.55392
SH2D3A	1.00935	4.96188	6.76493	0.000119627	0.00275964	1.54252
GDAP1	-1.29371	5.17739	-6.76484	0.000119638	0.00275964	1.54242
FEN1	1.81596	6.7282	6.7586	0.000120431	0.00277248	1.53555
TYMP	1.27114	5.33716	6.75767	0.000120549	0.00277248	1.53453
C17orf62	1.11286	7.58803	6.75574	0.000120796	0.00277384	1.5324
TMEM139	3.15724	6.17296	6.75347	0.000121087	0.00277739	1.5299
IRAK1	1.16392	6.87576	6.74774	0.000121824	0.00279118	1.52359
HHIP-AS1	-1.41878	5.28702	-6.74509	0.000122166	0.00279294	1.52067
TNRC6C-AS1	1.2004	5.68543	6.74503	0.000122174	0.00279294	1.5206
LEMD1	3.11363	5.8502	6.73905	0.000122951	0.00280401	1.514
ACP2	1.30992	7.42818	6.73814	0.00012307	0.00280401	1.513
KIF2C	2.14064	5.53951	6.73286	0.000123762	0.00281148	1.50717
RAB25	3.98311	6.98905	6.72575	0.000124699	0.00282542	1.49931
S100A2	4.10526	6.37396	6.71524	0.000126099	0.00284602	1.48769
EPHX2	-1.47937	6.58438	-6.71475	0.000126165	0.00284602	1.48715
MGME1	1.50877	7.96958	6.71252	0.000126465	0.00284965	1.48468
FASTKD1	1.99714	7.60708	6.70691	0.000127222	0.00286039	1.47847
CA11	-1.94369	6.90981	-6.69833	0.000128389	0.00287568	1.46897
SYNGR2	1.24266	5.95873	6.69779	0.000128464	0.00287568	1.46836
ZEB2	-1.38008	4.79665	-6.69438	0.000128931	0.00288024	1.46458
PTPN6	1.53861	6.76605	6.69025	0.0001295	0.00288776	1.46
COL9A1	1.03494	4.29233	6.68976	0.000129568	0.00288776	1.45945
SALL4	2.32871	6.53275	6.68298	0.000130508	0.00290554	1.45193
KPNA2	2.32161	8.7347	6.67823	0.000131171	0.0029108	1.44665
PDIA6	1.11282	9.56866	6.67674	0.00013138	0.00291229	1.44499
PHKA1	-1.05701	6.1588	-6.67201	0.000132046	0.00292072	1.43973
LOC389765	-1.46237	6.3022	-6.66749	0.000132685	0.00292537	1.4347
CETN3	-1.3453	8.92177	-6.66568	0.000132941	0.00292663	1.4327
ARHGEF6	-1.8211	7.5413	-6.66229	0.000133425	0.00293219	1.42892
ULK3	1.44572	7.4122	6.65827	0.000134	0.00294168	1.42444
KLK5	3.45739	5.99755	6.64169	0.0001364	0.00297203	1.40596
SLC44A4	1.26614	4.8632	6.62868	0.000138317	0.00299773	1.39142
SLC2A6	1.20471	5.16008	6.62773	0.000138458	0.00299773	1.39036
AIF1L	2.18394	6.30311	6.62664	0.000138621	0.00299807	1.38914
MAD1L1	1.04463	5.41148	6.62283	0.000139188	0.00300717	1.38488
JAM2	-2.46998	6.14015	-6.61093	0.00014098	0.00303626	1.37156
L1CAM	1.53976	5.05725	6.60803	0.000141419	0.00304252	1.36832
GSS	1.09009	8.02653	6.604	0.000142034	0.0030525	1.3638
POU5F1B	1.52505	7.72223	6.60304	0.000142181	0.0030525	1.36272
FAM49A	-1.31691	5.53604	-6.60134	0.000142441	0.00305488	1.36082
AP1M2	2.98698	6.91925	6.60017	0.000142622	0.00305554	1.3595
FAM228B	-1.1468	7.66982	-6.59615	0.00014324	0.00306288	1.35499
SLC27A6	-1.78169	5.97004	-6.59385	0.000143595	0.00306677	1.35241
SPAG9	-1.2576	6.40788	-6.5918	0.000143914	0.00306788	1.35011
SMIM22	1.2642	6.34806	6.59158	0.000143948	0.00306788	1.34986
MAN1C1	-1.1256	6.71877	-6.56558	0.000148044	0.0031289	1.32063
PSMD2	1.13333	9.57712	6.56468	0.000148187	0.0031289	1.31962
MFSD3	1.46139	5.27281	6.56196	0.000148624	0.00313488	1.31655
SKIV2L	1.08605	7.78804	6.55582	0.000149614	0.00314792	1.30963
LAPTM4B	2.26217	9.90842	6.55527	0.000149703	0.00314792	1.30901
NOP10	1.09693	9.33259	6.54311	0.000151687	0.00317774	1.29529
CPS1	-1.30944	4.73663	-6.54212	0.000151849	0.00317774	1.29418
SERPINA1	1.55738	5.15969	6.53684	0.000152721	0.00318398	1.28821
TRPM2	1.23276	5.86119	6.53634	0.000152803	0.00318398	1.28765
PREX1	1.01469	5.85377	6.53019	0.000153826	0.00320171	1.2807
TLE4	-1.42304	5.31927	-6.52834	0.000154134	0.00320487	1.27861
DDX17	-1.23704	7.55927	-6.51972	0.000155584	0.00322041	1.26885
RUSC1	1.12539	7.84543	6.51958	0.000155607	0.00322041	1.2687
PSMG3	1.30852	8.15218	6.51829	0.000155826	0.00322041	1.26723
C21orf62	-1.79228	5.64047	-6.51577	0.000156253	0.00322596	1.26438
RCAN3	1.0486	4.68157	6.50793	0.00015759	0.00323723	1.2555
NUPR1	-1.30968	9.44445	-6.50601	0.000157919	0.00324074	1.25332
SYNE1	-1.98532	5.18226	-6.49371	0.000160047	0.00325378	1.23937
RBP1	-1.44717	8.63538	-6.49326	0.000160126	0.00325378	1.23886
SSPN	-1.0945	6.77437	-6.49293	0.000160184	0.00325378	1.23848
UQCRC1	1.33507	9.31221	6.49226	0.000160301	0.00325378	1.23772
PSMB5	1.15518	9.13446	6.49202	0.000160343	0.00325378	1.23744
BAX	1.04296	5.02526	6.48261	0.000161995	0.00327214	1.22675
GAS2	-1.53085	4.49194	-6.48254	0.000162008	0.00327214	1.22667
ZDHHC23	2.30621	6.02003	6.48148	0.000162195	0.00327269	1.22547
CTSD	1.30619	7.52674	6.47526	0.000163301	0.00328665	1.21839
EID1	-1.55562	8.47468	-6.46458	0.000165216	0.00331405	1.20622
HCFC2	-1.19061	5.71088	-6.46155	0.000165763	0.0033185	1.20278
FBN1	-2.04809	7.47389	-6.45512	0.000166933	0.00333012	1.19544
ITM2A	-2.75517	8.62199	-6.45478	0.000166994	0.00333012	1.19506
MCM7	1.16114	8.31508	6.44735	0.000168358	0.00335404	1.18658
EPHX4	1.77198	3.9141	6.44363	0.000169045	0.00336223	1.18233
PTPRF	2.17117	8.19721	6.44335	0.000169097	0.00336223	1.18201
STIM2	-1.46285	6.36746	-6.44137	0.000169465	0.00336408	1.17974
MKI67	2.33266	5.38977	6.44019	0.000169684	0.00336408	1.1784
NAPRT	1.32234	7.25646	6.43877	0.000169947	0.00336603	1.17678
ACOX2	-1.16081	6.94872	-6.43419	0.000170803	0.00337644	1.17154
ASS1	2.81004	10.4066	6.43276	0.00017107	0.00337847	1.16991
PAX8	1.84559	6.45403	6.4303	0.000171534	0.00338436	1.16709
FAM84B	1.33432	6.84165	6.41758	0.000173943	0.00341843	1.15254
YDJC	1.36766	6.45075	6.41504	0.00017443	0.00341843	1.14962
KCNH2	1.22303	6.05498	6.40586	0.000176199	0.0034432	1.13909
SLC12A8	2.21725	5.95502	6.40353	0.00017665	0.00344873	1.13642
RPP40	1.09961	6.72014	6.40256	0.00017684	0.00344913	1.13531
DGAT1	1.76019	6.55941	6.40014	0.000177311	0.00345175	1.13253
EIF6	1.1396	8.89572	6.39775	0.000177778	0.00345754	1.12979
TIMELESS	1.42103	5.14391	6.39494	0.000178328	0.00346495	1.12656
FAM198B	-2.32112	7.35454	-6.39177	0.000178953	0.0034705	1.12291
SNCA	-1.53904	6.12042	-6.39087	0.00017913	0.00347064	1.12188
NR2F2	-2.47751	8.12612	-6.38705	0.000179885	0.00347385	1.11749
EDEM2	1.11172	6.48013	6.3866	0.000179974	0.00347385	1.11697
PKP3	1.3296	5.59849	6.38329	0.000180631	0.00347404	1.11317
BACE2	2.48992	6.78105	6.38312	0.000180666	0.00347404	1.11297
SLC16A14	-2.40667	6.96314	-6.38083	0.000181122	0.00347404	1.11034
PEAR1	-1.28719	6.92312	-6.38041	0.000181206	0.00347404	1.10986
SPATA7	-1.41774	6.80774	-6.38028	0.000181232	0.00347404	1.1097
YIF1A	1.10395	7.60868	6.37916	0.000181457	0.00347404	1.10841
MFSD12	1.01282	6.39539	6.37888	0.000181513	0.00347404	1.10809
EXOSC4	1.15046	7.35572	6.37586	0.000182118	0.00348237	1.10462
LGALS9	1.11936	7.45713	6.36853	0.000183598	0.00350086	1.09617
EPPK1	2.45764	6.38421	6.36187	0.000184952	0.00351357	1.0885
MLKL	1.18694	5.30077	6.35951	0.000185436	0.0035195	1.08577
SMOC2	-1.17969	7.02274	-6.35618	0.000186119	0.00352105	1.08194
CLDN4	1.60885	5.61941	6.35591	0.000186174	0.00352105	1.08163
EGFL6	4.0507	6.17046	6.35576	0.000186206	0.00352105	1.08145
ATP6V0B	1.82198	8.92426	6.34013	0.000189454	0.00356927	1.0634
ZBED2	4.05363	6.38264	6.33653	0.000190211	0.00357695	1.05924
CRY2	-1.08377	7.36854	-6.33493	0.000190549	0.00357723	1.05739
SERHL2	-1.10716	5.956	-6.33425	0.000190694	0.00357723	1.05659
PHACTR4	1.38731	8.05827	6.32856	0.0001919	0.00359396	1.05001
UCA1	3.47132	6.5656	6.32812	0.000191994	0.00359396	1.0495
TRAK1	1.32132	6.55074	6.32561	0.000192529	0.00359932	1.04659
PNRC1	-1.27421	10.2906	-6.32512	0.000192632	0.00359932	1.04603
LYSMD3	-1.68159	7.64699	-6.31357	0.000195118	0.00362919	1.03265
PRKACB	-1.03718	5.78487	-6.30752	0.000196434	0.00364874	1.02563
LRG1	1.75236	6.2387	6.3071	0.000196526	0.00364874	1.02514
RAB30	-1.63455	4.92894	-6.30199	0.000197647	0.00366624	1.0192
CFH	-1.82108	9.02454	-6.30033	0.000198013	0.00366637	1.01727
ACLY	1.04573	7.0648	6.29375	0.000199468	0.00368664	1.00963
CCNE1	1.62832	5.58254	6.28835	0.00020067	0.00370283	1.00335
ZNF415	-1.29869	6.44358	-6.2863	0.000201128	0.00370283	1.00098
LRP8	2.41337	5.6783	6.28615	0.000201162	0.00370283	1.0008
MTTP	-2.29901	4.48913	-6.28577	0.000201249	0.00370283	1.00035
DNAJA2	-1.08275	7.95586	-6.28458	0.000201515	0.0037044	0.998967
GTF2IRD1	1.09137	7.78754	6.28237	0.000202011	0.00371018	0.996402
BRD9	1.29991	8.30386	6.28052	0.000202428	0.00371029	0.994248
CRIP2	2.64405	7.67277	6.27878	0.000202823	0.00371029	0.992214
HIC1	-1.27384	4.98961	-6.27776	0.000203052	0.00371029	0.991031
FRRS1L	-1.69627	4.76428	-6.27577	0.000203503	0.00371029	0.988714
DAPK1-IT1 /// DAPK1-IT1	-1.8327	7.04865	-6.27513	0.000203649	0.00371029	0.987968
CGN	2.52673	7.03306	6.26539	0.000205874	0.00374085	0.976617
FAM64A	1.23267	4.66903	6.26336	0.000206341	0.00374378	0.974253
FERMT2	-1.11275	7.55904	-6.26155	0.00020676	0.00374696	0.972132
VCAN	2.84673	6.39964	6.25975	0.000207176	0.00374785	0.970036
TROAP	1.55932	5.75662	6.24729	0.000210083	0.00377706	0.955482
ZSCAN16	1.70167	5.54654	6.24623	0.000210332	0.00377821	0.954246
CLCN5	-1.12748	5.1839	-6.24315	0.000211057	0.00378682	0.950648
JUP	1.77122	8.93411	6.23853	0.000212152	0.00379036	0.945244
APMAP	1.10875	8.81134	6.23581	0.000212799	0.00379257	0.942064
ESPL1	1.97302	6.0512	6.23391	0.000213252	0.00379404	0.939841
PDIA4	1.10995	7.94145	6.22988	0.000214218	0.00379953	0.935124
CTSB	1.32455	9.70604	6.22952	0.000214304	0.00379953	0.934702
DHRS11	1.51047	5.81605	6.22855	0.000214539	0.00380041	0.933556
PROSER1	1.19497	6.17098	6.22266	0.00021596	0.00382227	0.92666
PRR11	1.34855	9.26064	6.22168	0.000216197	0.00382315	0.925516
IGSF11	-2.17021	5.52678	-6.22061	0.000216458	0.00382406	0.924254
DCN	-2.10236	8.6394	-6.21987	0.000216636	0.00382406	0.923395
XYLT1	-1.04108	4.89963	-6.21882	0.000216894	0.00382406	0.922155
XPR1	1.56751	7.09808	6.2184	0.000216996	0.00382406	0.921662
ENPP1	-1.17997	5.19703	-6.21499	0.000217826	0.00383539	0.917673
NCAPD3	1.29695	6.84734	6.2106	0.000218904	0.00384967	0.912517
SIPA1	1.03321	6.33789	6.20939	0.000219202	0.00384967	0.911095
ABCC1	1.17847	6.58395	6.20796	0.000219553	0.00385052	0.909422
ADRM1	1.47716	7.95747	6.20767	0.000219626	0.00385052	0.909074
STAT1	1.4317	7.21994	6.20456	0.000220394	0.00385407	0.905429
SLK	-1.31428	8.4442	-6.20127	0.000221212	0.00386177	0.901558
FBXL19	1.07813	6.13133	6.20004	0.000221518	0.00386382	0.900114
LAMTOR2	1.37977	7.55204	6.19325	0.000223217	0.00388683	0.89213
B4GALT2	1.12218	6.84538	6.19152	0.000223652	0.00389108	0.890098
RPL39L	1.77613	5.77222	6.18945	0.000224174	0.00389685	0.887661
VAMP8	3.18903	8.54694	6.18587	0.000225078	0.00390263	0.883455
RHPN2	2.82911	8.02674	6.17899	0.000226832	0.00391853	0.875343
HSDL2	-1.77311	6.30408	-6.17777	0.000227145	0.00391853	0.873905
ANKRD46	-1.56794	8.01708	-6.17464	0.000227945	0.00392857	0.870228
TP53I3	2.1415	7.11344	6.17121	0.000228829	0.00393488	0.866182
TRPM4	1.46823	5.49592	6.1696	0.000229246	0.00393488	0.864279
CSK	1.22281	7.66224	6.16607	0.000230162	0.00394729	0.860115
MYBL2	1.85253	6.13824	6.16287	0.000230994	0.00395144	0.856344
MGST2	1.23154	8.31544	6.16177	0.000231282	0.00395144	0.855041
RHBDF2	1.6679	6.68772	6.16023	0.000231684	0.00395144	0.853226
SLC22A18	1.4332	7.60852	6.15838	0.000232169	0.00395264	0.851039
NKIRAS1	-1.03414	6.76679	-6.15801	0.000232265	0.00395264	0.850607
STK32C	1.1042	4.96077	6.15748	0.000232406	0.00395264	0.849973
LINC00839	1.72218	5.81807	6.146	0.000235442	0.00400095	0.836408
VIM	-1.47878	9.14708	-6.14134	0.000236687	0.00401211	0.830896
TEAD3	1.36997	6.46088	6.14115	0.000236738	0.00401211	0.830672
CEBPG	2.059	6.44447	6.14061	0.000236883	0.00401211	0.83003
GPX1	1.41502	10.6502	6.13112	0.000239443	0.00404876	0.818797
KIF4A	2.5093	5.13727	6.1256	0.000240946	0.00405727	0.812254
RABGAP1L	-1.16089	6.02434	-6.12549	0.000240975	0.00405727	0.812129
NCBP2	1.02244	8.10983	6.12451	0.000241245	0.00405727	0.810961
THEMIS2	2.68701	5.74283	6.12427	0.000241311	0.00405727	0.810674
XDH	1.51363	5.05526	6.1241	0.000241355	0.00405727	0.810481
LMNB1	1.89638	5.5697	6.12346	0.000241532	0.00405727	0.809714
POLR3GL	-1.14464	7.83383	-6.12098	0.000242211	0.00405866	0.806784
GLG1	-1.15563	8.67856	-6.10978	0.000245312	0.00410056	0.793482
SMC3	-1.15931	5.60507	-6.10896	0.000245541	0.00410103	0.792508
GALNT10	-2.46253	7.16911	-6.10613	0.00024633	0.0041075	0.789154
SH3BP5	-1.23327	9.34613	-6.1046	0.000246758	0.00410776	0.787339
WIPF3	-1.25097	6.53203	-6.09773	0.000248695	0.00412164	0.779161
FAM46A	-1.08662	6.90171	-6.09702	0.000248896	0.00412164	0.778317
MUC20	2.31687	6.59137	6.09668	0.000248991	0.00412164	0.777921
SNAP91	-1.03083	4.37418	-6.0954	0.000249354	0.00412431	0.776399
HOOK2	1.65057	8.15864	6.08242	0.000253066	0.00417453	0.760947
OAS3	1.46887	5.67448	6.07953	0.000253903	0.00417606	0.757494
ABCA9	-1.88824	4.73396	-6.07459	0.000255335	0.00418487	0.751612
LRRC8E	1.23211	4.31697	6.07428	0.000255427	0.00418487	0.751235
PDGFRA	-1.06825	6.11294	-6.07413	0.000255469	0.00418487	0.751064
IFRD2	1.24025	7.60852	6.06977	0.000256744	0.00420238	0.74586
PKN1	1.4015	7.64499	6.06645	0.000257719	0.00421483	0.741895
LOC100507557	-1.91907	4.90125	-6.06578	0.000257917	0.00421483	0.741094
CIRBP	-1.12857	9.01365	-6.06433	0.000258344	0.00421763	0.739362
TMEM185B	1.05632	6.1379	6.06362	0.000258553	0.00421763	0.738515
ING1	-1.12381	6.43523	-6.06229	0.000258944	0.00421763	0.736935
ATP8A1	-1.21221	4.81027	-6.06171	0.000259118	0.00421763	0.736234
ZGPAT	1.49789	7.00936	6.05591	0.00026084	0.00423339	0.729308
GAB1	-1.03921	5.0549	-6.05497	0.000261121	0.00423339	0.728182
NOSTRIN	-2.28958	6.37477	-6.04814	0.000263166	0.00425875	0.720023
WNT7A	1.13028	5.09041	6.04714	0.000263468	0.00425875	0.718825
LINGO1	1.76349	5.18478	6.04697	0.000263518	0.00425875	0.718625
PMM2	1.49773	6.83209	6.04273	0.0002648	0.00427121	0.71355
SMDT1	-1.221	7.62036	-6.04235	0.000264915	0.00427121	0.713094
SNX29P2	-1.78209	4.5186	-6.03388	0.000267499	0.00429932	0.702944
C8orf49	-1.02437	3.8834	-6.02795	0.000269321	0.0043252	0.695845
MROH1	1.09344	5.14655	6.02565	0.000270033	0.00433324	0.693081
ZXDA	-1.22025	6.0485	-6.02337	0.000270738	0.00434115	0.690354
ISG15	3.9069	9.13711	6.01104	0.000274597	0.00439284	0.67555
LY96	-1.90744	7.74432	-6.01101	0.000274606	0.00439284	0.675517
MIEN1	1.23206	8.16562	6.00715	0.000275827	0.00440892	0.670877
GRAMD1B	-1.29448	7.75308	-5.98951	0.000281482	0.00448302	0.649646
LOC101927263	-2.39499	5.62545	-5.98927	0.000281558	0.00448302	0.649362
ZBTB20	-1.91415	8.15798	-5.98841	0.000281837	0.00448397	0.648328
CELSR3	1.39545	5.11528	5.98539	0.000282821	0.00449613	0.644682
KAT2B	-2.09804	7.13769	-5.98355	0.00028342	0.00450215	0.642467
ALOX5	1.41181	4.87288	5.97902	0.000284903	0.0045222	0.637007
EIF4EBP1	1.54687	7.02929	5.97662	0.000285693	0.00453122	0.634112
LOC100506563	-1.07661	4.68978	-5.96673	0.000288971	0.00456368	0.622175
SMARCA2	-1.38625	6.08391	-5.96277	0.000290294	0.00457935	0.617394
FAM181A	1.21157	4.93973	5.95851	0.000291727	0.00459134	0.612242
USP54	1.03259	7.68178	5.95637	0.000292449	0.00459916	0.609656
SLC4A11	2.45864	6.17162	5.95327	0.000293496	0.00461208	0.605918
RHOF	1.07337	5.61197	5.95027	0.000294517	0.00462287	0.602283
BBIP1	-1.20038	7.08175	-5.94993	0.000294634	0.00462287	0.601866
LOC100129098	1.37796	6.70215	5.94525	0.000296232	0.00463372	0.596208
TMEM125	2.48288	7.41854	5.92562	0.000303044	0.00471863	0.572415
BEND5	-1.44796	5.55312	-5.92321	0.000303892	0.00472173	0.569493
CUEDC1	1.6313	6.64911	5.92309	0.000303935	0.00472173	0.569343
CXADR	2.35682	6.43304	5.92003	0.000305014	0.00472716	0.565635
TSPAN14	1.41267	6.97421	5.91948	0.000305209	0.00472716	0.564965
DNER	-1.03291	3.68762	-5.91869	0.000305491	0.00472794	0.564
COX6B1	1.19497	10.8662	5.91326	0.000307421	0.00475012	0.557408
IFI44L	2.41014	8.15851	5.91042	0.000308435	0.0047589	0.553961
FOLR3	1.18372	4.69668	5.90981	0.000308654	0.0047589	0.55322
NAA38	1.40703	8.99019	5.90589	0.000310064	0.00477404	0.54845
TMEM64	-1.22405	6.02082	-5.90568	0.000310139	0.00477404	0.548196
SGCD	-1.11959	5.75472	-5.90513	0.000310336	0.00477404	0.547531
GTSE1	1.3933	5.47318	5.90196	0.000311485	0.00478811	0.543664
VSTM4	-1.09111	5.65227	-5.89631	0.000313537	0.00481603	0.536792
FABP5	2.09016	7.8116	5.89245	0.000314949	0.00482686	0.532088
MPV17L	-1.22797	6.22091	-5.88835	0.000316453	0.00483808	0.527101
DUSP23	1.38272	8.36766	5.88827	0.000316485	0.00483808	0.526996
FLVCR1	1.3472	6.90606	5.88735	0.000316822	0.00483808	0.52588
RAD54B	1.22078	5.97509	5.88635	0.000317191	0.00483808	0.524664
BLACAT1	2.84105	5.90699	5.8857	0.000317433	0.00483808	0.523863
USP18	2.54742	5.78813	5.88532	0.000317573	0.00483808	0.523403
MTMR11	-1.29572	7.5373	-5.87823	0.000320207	0.00487458	0.514757
PLCL2	-1.85333	5.63321	-5.87581	0.000321112	0.00488472	0.511802
CD9	1.75754	7.43064	5.87463	0.000321555	0.00488783	0.510358
LCORL	-1.32478	5.57106	-5.86733	0.000324302	0.00491862	0.501455
KIAA1033	-1.31929	6.99094	-5.8664	0.000324655	0.00492033	0.500315
ZRANB1	-1.29315	7.14516	-5.86302	0.000325939	0.00492801	0.496183
MOCS2	-1.1922	6.13864	-5.86253	0.000326125	0.00492801	0.495585
PLEKHH2	-2.17373	5.99189	-5.85995	0.00032711	0.0049356	0.49243
RFPL1S	-2.15457	5.30301	-5.849	0.000331323	0.00497361	0.479031
NUSAP1	1.20336	5.99403	5.84709	0.000332064	0.00497361	0.476692
DFNA5	-1.89275	7.67122	-5.84696	0.000332116	0.00497361	0.476531
MRPL13	1.22572	7.44171	5.84623	0.000332396	0.00497361	0.475646
CORO2B	-1.70116	5.98136	-5.84473	0.000332981	0.00497361	0.473807
RNF11	-1.4383	9.07597	-5.8446	0.000333033	0.00497361	0.473643
COMP	2.74882	5.068	5.84138	0.000334291	0.00498274	0.469697
SLC35F2	1.5086	6.5088	5.83887	0.000335273	0.0049925	0.466624
NEK2	1.757	4.36802	5.8379	0.000335654	0.00499453	0.465436
AKR1C3	-1.16516	7.79836	-5.83493	0.000336822	0.00500477	0.461798
POU5F1P4	1.67102	5.71927	5.83481	0.000336871	0.00500477	0.461647
GGH	1.80447	5.89684	5.83172	0.000338092	0.00501258	0.457859
FAM122A	-1.23421	5.57136	-5.831	0.000338377	0.00501318	0.456975
HLA-B	1.41946	11.4525	5.82855	0.000339349	0.00502394	0.453973
CBLC	1.03411	4.82308	5.82185	0.000342028	0.00504898	0.44574
TJP3	1.64137	5.99427	5.81661	0.000344137	0.00506662	0.439303
EVPL	1.10036	5.64409	5.81413	0.000345138	0.00507658	0.436262
CD151	1.19118	8.09836	5.80997	0.00034683	0.00508596	0.431142
KLHL13	-3.0196	5.70123	-5.80944	0.000347045	0.00508596	0.430491
MAL	2.51196	6.04654	5.80674	0.000348148	0.00509157	0.427168
C11orf96	-3.4766	9.92894	-5.80399	0.000349274	0.00509542	0.423788
AMHR2	-1.31658	6.557	-5.80384	0.000349336	0.00509542	0.423601
PYCR1	1.36215	6.76617	5.80367	0.000349407	0.00509542	0.423388
ROR1	-1.55186	6.46844	-5.80016	0.00035085	0.00510192	0.419072
LOC100131541	1.36915	7.54012	5.79733	0.00035202	0.00510971	0.415588
SLC25A17	-1.03182	6.55959	-5.79727	0.000352046	0.00510971	0.415511
HAUS1	-1.20472	7.64517	-5.79439	0.000353238	0.00511984	0.411971
FHDC1	1.42144	6.54106	5.79295	0.000353839	0.00511984	0.410191
ROBO1	-2.27436	8.59317	-5.79232	0.000354101	0.00511984	0.409416
DHFR	1.09853	5.93878	5.79231	0.000354104	0.00511984	0.409406
MTCH2	1.05888	8.06843	5.7876	0.000356074	0.00512686	0.403596
S100A1	2.08784	6.33964	5.78594	0.000356768	0.00513325	0.401556
DNAJB4	-1.51847	5.97782	-5.78427	0.000357473	0.00513616	0.399491
RASGEF1A	1.78848	5.12884	5.77871	0.000359821	0.00516266	0.392632
FBXO8	-1.36512	6.44	-5.76606	0.000365231	0.00522196	0.377004
EPB41L2	-1.24347	7.28535	-5.76176	0.000367088	0.0052444	0.371694
CENPM	1.94345	5.63328	5.76104	0.0003674	0.0052444	0.370802
MICB	1.49604	5.2067	5.7606	0.000367594	0.0052444	0.37025
KPNA5	-1.5276	6.37723	-5.75786	0.000368786	0.0052444	0.366859
FRMD6	-1.45954	7.78702	-5.75776	0.00036883	0.0052444	0.366735
NSUN5	1.14845	8.80817	5.75712	0.000369108	0.0052444	0.365947
MGARP	-2.64318	7.67001	-5.75141	0.000371607	0.0052726	0.358878
SLFN13	1.95339	4.70219	5.74853	0.000372874	0.00527958	0.355314
TCEAL4	-1.05132	10.7657	-5.74718	0.000373469	0.00528239	0.353645
SLC2A1	1.34878	5.24044	5.74691	0.000373588	0.00528239	0.353309
COX5A	1.07346	7.24458	5.73501	0.000378889	0.00534496	0.338551
CXXC5	3.29638	8.54567	5.73446	0.000379134	0.00534496	0.337874
OCLN	1.16625	6.21752	5.73347	0.000379581	0.00534496	0.33664
POU5F1P3	1.89557	5.75944	5.73076	0.000380801	0.00535552	0.333278
PRCC	1.0971	6.28802	5.73006	0.000381116	0.00535552	0.332413
LOC102659288	3.16487	5.04578	5.72863	0.000381762	0.00536035	0.330639
PAK6	1.52233	5.64464	5.72696	0.000382517	0.00536048	0.32857
MYB	1.11538	4.32579	5.72417	0.000383785	0.00537457	0.325103
LSM4	1.35472	6.94971	5.71741	0.000386877	0.00540548	0.316697
CCBE1	-2.31083	5.93029	-5.71584	0.000387598	0.00540946	0.314746
EPCAM	4.83035	8.99557	5.71059	0.00039002	0.00543062	0.308222
TRPC1	-1.77104	6.09859	-5.70397	0.000393099	0.00546015	0.299984
GRB7	1.82228	7.40546	5.70285	0.000393621	0.0054637	0.298593
MRPL3	1.0296	10.2067	5.69962	0.00039514	0.00548031	0.294559
DHCR24	3.44305	8.75576	5.69636	0.000396675	0.00548909	0.290497
MELK	2.83423	6.49862	5.69554	0.00039706	0.00548909	0.289481
HSD3B7	1.42298	6.61264	5.69183	0.000398818	0.00550595	0.284852
THSD4	1.65762	5.40594	5.68845	0.000400423	0.00551051	0.280646
MAPK10	-1.23563	4.90715	-5.68814	0.000400574	0.00551051	0.28025
HUNK	1.22422	5.91959	5.68774	0.000400764	0.00551051	0.279752
ILDR1	1.17348	4.88128	5.68557	0.000401798	0.00552037	0.277053
C1orf226	1.35111	5.36772	5.68152	0.000403745	0.0055329	0.27199
NUDT11	-2.61933	6.61332	-5.68066	0.000404158	0.00553303	0.270917
PRNP	-1.02126	8.68521	-5.68037	0.000404295	0.00553303	0.270563
BIRC5 /// EPR-1	1.56216	4.99248	5.67452	0.000407124	0.00555688	0.263257
SULT1C2	1.43141	4.90523	5.66817	0.000410221	0.00558797	0.255317
TM4SF1	1.68518	6.82951	5.66393	0.000412302	0.00560287	0.250015
STK36	1.12985	7.95478	5.66259	0.000412963	0.00560294	0.248337
POLM	1.23056	6.0496	5.65146	0.000418489	0.00566288	0.234411
DDR2	-1.22118	7.85158	-5.64849	0.000419979	0.00566806	0.230685
CTSO	-1.51519	7.00974	-5.64719	0.000420634	0.00567315	0.229053
PRSS35	-3.34502	5.94936	-5.64501	0.000421732	0.0056781	0.226322
IL6ST	-1.01792	6.07171	-5.64481	0.000421834	0.0056781	0.226069
PWAR6	-1.36319	8.00592	-5.64147	0.000423522	0.00569155	0.221884
FGFR1OP2	-1.16597	5.78206	-5.64145	0.000423531	0.00569155	0.22186
PKMYT1	1.04391	5.52068	5.64118	0.000423667	0.00569155	0.221524
DENND4A	-1.35329	5.99492	-5.63779	0.000425389	0.0057001	0.217274
TYMS	1.34465	5.59464	5.63511	0.00042676	0.00571407	0.213903
ST14	1.93863	5.83695	5.6346	0.000427019	0.00571407	0.213267
KNTC1	1.43614	6.12294	5.62701	0.000430918	0.00575495	0.203741
GULP1	-1.5486	6.2936	-5.62462	0.000432159	0.00576024	0.20073
CTPS1	2.29731	6.13346	5.624	0.00043248	0.00576077	0.199951
RTN2	1.05918	5.47311	5.62143	0.000433813	0.005771	0.196727
ZNF540	-1.71792	4.71155	-5.61931	0.000434919	0.00578197	0.194057
NUP85	1.1357	7.80108	5.61516	0.000437092	0.00579578	0.188836
BIK	3.13218	7.10682	5.6143	0.000437541	0.00579798	0.187759
RNF128	-3.03015	4.98007	-5.61195	0.000438779	0.00580687	0.184797
SLC35B1	1.57758	7.59323	5.60813	0.000440793	0.00582457	0.179998
ADRA2A	-2.07027	7.40824	-5.60571	0.00044208	0.00583545	0.176944
DIRAS3	-3.45523	7.32707	-5.59825	0.00044606	0.00588041	0.16755
GRAMD2	2.50021	5.96695	5.59214	0.000449352	0.00590632	0.159846
CENPW	2.27378	7.38082	5.59136	0.000449776	0.00590632	0.158858
MROH6	1.35293	7.67009	5.59053	0.000450224	0.00590632	0.157814
ORAI1	1.36689	6.22866	5.58904	0.000451034	0.00590791	0.15593
FAM169A	-1.96701	5.50716	-5.58639	0.000452472	0.00591322	0.152593
CBR3	-1.27239	7.05877	-5.58616	0.000452596	0.00591322	0.152307
RECQL4	1.00591	6.07254	5.58496	0.000453255	0.00591805	0.150782
ARID4A	-1.06121	6.22072	-5.58405	0.00045375	0.00592074	0.149638
IGDCC4	-2.21275	6.587	-5.58069	0.000455588	0.00594094	0.1454
S100A16	1.02347	9.78005	5.57642	0.000457943	0.00596628	0.139998
HLA-DRA	2.26814	10.0262	5.5761	0.000458115	0.00596628	0.139605
LLGL2	1.58382	5.22958	5.57389	0.00045934	0.00597463	0.136805
MTUS2	-1.96217	4.93542	-5.56941	0.000461827	0.00599936	0.131145
CORO1A	1.65635	6.62329	5.56707	0.000463132	0.00601249	0.128188
DNMT1	1.35724	7.47469	5.56637	0.000463526	0.00601379	0.127297
SGPP2	2.32871	5.51616	5.56189	0.000466041	0.00603407	0.121626
EPB41L3	-1.94392	5.64227	-5.56157	0.000466219	0.00603407	0.121225
HSPB1	1.28613	10.8563	5.55409	0.000470452	0.00607284	0.111752
NCKAP1L	1.05445	5.44635	5.54632	0.000474892	0.00612326	0.101906
E2F8	2.30288	4.33903	5.54273	0.00047696	0.00613748	0.0973517
TNFSF10	1.56322	8.88912	5.53945	0.000478856	0.00615047	0.0931922
GPI	1.68472	9.55175	5.53865	0.000479318	0.00615235	0.0921821
LSP1	1.1041	5.7987	5.53309	0.00048256	0.00618342	0.085116
PGP	1.05208	5.87209	5.53044	0.000484113	0.00618572	0.0817476
MAMDC2	-2.93769	6.25524	-5.53	0.000484367	0.00618572	0.081199
CDCA8	1.54868	6.0766	5.52904	0.000484934	0.00618572	0.0799731
SENP6	-1.14932	6.7002	-5.52903	0.000484941	0.00618572	0.0799574
CCND2	-1.18261	5.63935	-5.52805	0.000485513	0.00618916	0.0787215
KRT14	3.07052	5.26796	5.52587	0.000486798	0.00619987	0.0759513
NUF2	2.06542	4.68239	5.52506	0.000487277	0.00619987	0.0749205
PCDHB16	-2.46453	5.97926	-5.52457	0.000487566	0.00619987	0.0742991
MIR205HG	1.14356	3.85936	5.52154	0.000489361	0.00621112	0.0704457
MCF2	-2.13664	4.46616	-5.51857	0.00049113	0.0062297	0.0666647
GRN	1.29527	8.71743	5.51688	0.00049214	0.00622997	0.0645106
PDE7B	-1.6558	6.0898	-5.51562	0.00049289	0.00622997	0.0629132
OAS2	1.39998	4.98562	5.51548	0.000492977	0.00622997	0.0627287
LOC613266	3.45224	5.27349	5.51511	0.000493198	0.00622997	0.06226
CYBA	1.15146	7.32486	5.51497	0.000493282	0.00622997	0.0620812
CAMLG	-1.25829	10.2666	-5.51276	0.000494607	0.00623314	0.0592695
ASXL3	-1.64391	5.58889	-5.51252	0.000494751	0.00623314	0.058963
KBTBD11	-1.55246	5.33263	-5.50935	0.00049666	0.00624975	0.0549265
CCT5	1.13377	7.7271	5.50926	0.000496715	0.00624975	0.0548115
NCK1-AS1	1.96364	5.67403	5.5088	0.000496987	0.00624975	0.0542376
KLF2	-1.8634	7.1787	-5.50743	0.000497815	0.00625633	0.0524908
ENO1	1.09585	7.271	5.50572	0.00049885	0.00626549	0.0503135
ECEL1	-1.93673	6.65602	-5.50507	0.00049925	0.00626666	0.0494749
TMEM55A	-1.9077	5.26305	-5.49838	0.000503324	0.00631006	0.0409541
CMTM7	1.97797	7.90004	5.49196	0.00050727	0.00634786	0.0327678
LOC286367	-1.19709	5.48807	-5.49134	0.000507651	0.00634862	0.0319817
SLC25A39	1.30445	7.70617	5.48998	0.000508493	0.00634911	0.0302435
GATA4	-1.23818	5.79583	-5.46803	0.00052228	0.00646844	0.00219672
MFAP5	1.47032	4.14175	5.45961	0.000527677	0.00651188	-0.00858153
HTR1E	-2.28813	6.10454	-5.45958	0.000527697	0.00651188	-0.00862124
CNKSR1	1.26138	6.60438	5.45741	0.000529097	0.00652128	-0.0113977
VPS37A	-1.11833	6.03645	-5.45669	0.000529566	0.00652313	-0.0123263
HCLS1	1.434	6.70703	5.45591	0.000530066	0.0065232	-0.0133163
RHPN1	1.15292	6.53219	5.45215	0.000532513	0.00654367	-0.0181449
NUDT5	1.19633	7.27798	5.45053	0.000533565	0.00654873	-0.0202139
ATP1A1	1.00141	9.77715	5.44768	0.000535429	0.00656373	-0.0238702
TECR	1.08682	6.65217	5.44451	0.000537512	0.00657089	-0.0279414
LOC100288570	1.15395	6.04926	5.44434	0.000537618	0.00657089	-0.0281491
CXCR4	2.9356	7.4261	5.4433	0.000538303	0.00657533	-0.0294834
FIBP	1.03199	8.6463	5.44006	0.000540443	0.00659753	-0.0336433
RAB15	1.03052	6.24445	5.43799	0.000541819	0.00661038	-0.0363091
NOP2	1.49099	7.77875	5.43687	0.00054256	0.00661154	-0.0377415
RPS27L	-1.07226	7.21948	-5.43626	0.000542964	0.00661253	-0.0385231
APOBEC3B	2.30048	5.16071	5.43485	0.000543904	0.00661689	-0.0403361
DHTKD1	1.07819	7.11588	5.43475	0.000543969	0.00661689	-0.0404622
ZNF516	-1.66121	7.08915	-5.43294	0.000545179	0.00662766	-0.0427906
ZNF521	-2.33214	6.37675	-5.43238	0.000545553	0.00662827	-0.0435096
ZNF615	-1.32463	6.47386	-5.42663	0.000549407	0.00665534	-0.0508915
RNF183	1.91183	5.70462	5.42409	0.000551123	0.00666823	-0.0541607
FAXDC2	-1.02365	7.81881	-5.42327	0.000551678	0.006671	-0.0552158
FOLR1	5.00171	8.50927	5.41906	0.000554537	0.00670161	-0.0606349
DEFB1	4.45774	7.70581	5.41714	0.000555844	0.00671344	-0.0631034
BBX	-1.06073	8.13178	-5.4094	0.000561151	0.00676442	-0.0730679
GPR39	1.00429	4.66966	5.40858	0.000561718	0.00676442	-0.0741264
PECAM1	1.14202	5.58522	5.40422	0.000564733	0.00678509	-0.079739
PLXNB1	1.08799	6.61632	5.40007	0.000567624	0.00680489	-0.0850942
XKR4	2.29803	4.62577	5.39952	0.000568007	0.00680489	-0.0858006
TMC5	1.12545	4.30205	5.39674	0.000569953	0.00681944	-0.089387
TPD52	2.00565	5.51437	5.39601	0.000570462	0.00682153	-0.0903223
ITGB2-AS1	1.12758	5.29148	5.39395	0.000571912	0.00683488	-0.0929849
ZNF423	-1.59812	7.38081	-5.39223	0.000573125	0.00684539	-0.0952073
ARHGAP26	1.23342	4.84794	5.38901	0.000575398	0.0068561	-0.0993562
PDE8B	-1.92921	4.73856	-5.38854	0.000575732	0.0068561	-0.0999653
TESK2	-1.11821	6.51204	-5.38854	0.000575732	0.0068561	-0.099966
CLMP	-1.47861	5.75199	-5.38685	0.000576933	0.0068561	-0.102151
SGCE	-1.47956	8.89742	-5.38294	0.000579716	0.00686175	-0.107196
SLCO2A1	1.45436	5.34084	5.382	0.000580392	0.00686175	-0.108419
FAM175A	-1.8753	5.91609	-5.38184	0.000580503	0.00686175	-0.108619
ALG8	1.04133	8.10198	5.38032	0.000581592	0.00686238	-0.110584
HMBS	1.27238	7.61057	5.37827	0.000583063	0.00686985	-0.113233
E2F5	1.20535	6.13923	5.37222	0.000587428	0.00690734	-0.121054
TUBG1	1.82166	6.31838	5.36228	0.000594678	0.00696059	-0.133917
DPF3	-1.63633	5.9148	-5.35923	0.000596922	0.00697887	-0.137866
FAM189A2	-2.30975	7.05894	-5.35657	0.000598886	0.00698985	-0.141311
RUNX3	1.70927	5.92749	5.35439	0.000600505	0.00700264	-0.144143
IRF9	1.43945	8.4871	5.35417	0.000600666	0.00700264	-0.144423
SMG5	1.0148	7.44199	5.35327	0.000601337	0.00700445	-0.145593
MRPL12	1.14301	7.18731	5.35281	0.000601677	0.00700445	-0.146186
NXPH2	-1.10628	4.25028	-5.35248	0.000601922	0.00700445	-0.146613
SHMT2	1.06702	7.70363	5.34798	0.000605281	0.00702044	-0.152449
MX1	2.07989	9.32084	5.34496	0.000607547	0.00704273	-0.156368
KLHDC8A	-2.5149	8.867	-5.34404	0.000608238	0.00704674	-0.15756
ADPRM	-1.08332	6.35908	-5.34143	0.000610208	0.00706157	-0.160951
DPYD	-1.0546	4.80775	-5.33886	0.000612149	0.00707603	-0.164282
TCEAL8	-1.08492	7.46982	-5.33812	0.000612714	0.00707856	-0.165248
GREB1L	-1.24109	5.10649	-5.32693	0.00062127	0.00714674	-0.179791
FAAH	1.19449	5.86215	5.32572	0.000622203	0.00714782	-0.181364
KDELC2	-1.15652	7.12035	-5.32298	0.000624321	0.00716411	-0.184928
TGFB1	1.01797	5.15945	5.31782	0.000628328	0.00720201	-0.191637
STK33	-1.39147	5.86017	-5.30754	0.000636398	0.00727007	-0.205021
RASGRF2	-2.02688	7.04498	-5.30428	0.000638985	0.00728743	-0.209276
PXDN	1.27903	8.60207	5.29835	0.000643717	0.00732505	-0.217013
PSRC1	1.98492	5.58159	5.29621	0.000645426	0.00734042	-0.219794
BBS2	-1.20239	7.89268	-5.29553	0.000645978	0.00734179	-0.22069
FAM83H	1.67696	5.40695	5.29517	0.000646264	0.00734179	-0.221155
PSMD14	1.0494	9.14521	5.29422	0.000647028	0.00734639	-0.222394
IGF2BP3	1.26208	4.18657	5.29328	0.000647783	0.00735089	-0.223617
YPEL4	-1.97249	5.38433	-5.29164	0.000649109	0.00736051	-0.225761
FAM161A	-1.02814	5.09606	-5.2837	0.000655562	0.00740673	-0.236137
NDUFA13	1.20498	10.6403	5.28344	0.000655776	0.00740673	-0.236477
LOC80154	1.39742	6.81083	5.28321	0.000655963	0.00740673	-0.236777
PIK3R1	-1.7659	7.38976	-5.28186	0.00065706	0.00741503	-0.23853
FAT4	-1.95749	5.50852	-5.28082	0.000657915	0.00742058	-0.239893
TRIAP1	1.02385	8.35667	5.27884	0.000659542	0.00742353	-0.242484
IRF6	1.15099	5.25512	5.27692	0.000661127	0.00742814	-0.245
ETNK2	-1.04389	5.95392	-5.27069	0.000666282	0.00746897	-0.253146
RPS10P7	1.29788	4.51187	5.26665	0.000669645	0.00748484	-0.258428
ASF1B	2.3529	6.36513	5.26573	0.000670417	0.00748484	-0.259635
RBM43	-1.94403	5.35569	-5.26463	0.000671334	0.00748937	-0.261069
TMEM192	-1.24005	7.54736	-5.26268	0.000672978	0.00749952	-0.263634
PRRX2	1.10257	7.07803	5.2587	0.00067633	0.00752406	-0.268845
FDXR	-1.78875	6.76025	-5.25867	0.000676352	0.00752406	-0.268879
SEMA3F	1.63078	5.93902	5.25769	0.000677181	0.00752586	-0.270163
MAL2	4.92604	8.28515	5.24986	0.000683844	0.00756924	-0.280433
IRS2	-1.03726	9.45414	-5.24963	0.000684043	0.00756924	-0.280738
TACSTD2	1.50324	5.49056	5.24856	0.00068496	0.00757305	-0.282142
SLPI	4.36271	10.4729	5.24836	0.000685127	0.00757305	-0.282399
DNMT3B	1.51457	6.37322	5.24746	0.000685898	0.00757339	-0.283579
C19orf54	1.42327	6.67457	5.24639	0.000686821	0.00757949	-0.284989
DIP2C	-1.07786	7.45761	-5.24563	0.000687471	0.00758124	-0.28598
PJA2	-1.42706	8.91286	-5.24242	0.000690234	0.00759519	-0.290188
CLDN9	1.0353	5.15545	5.24172	0.000690843	0.00759519	-0.291112
CHTF18	1.16146	6.36024	5.23894	0.00069325	0.00761075	-0.294761
LINC00909	-1.08751	7.29264	-5.23878	0.000693391	0.00761075	-0.294974
ANKS1B	-1.11438	4.58663	-5.23597	0.000695834	0.00762956	-0.298662
SSBP2	-1.39218	5.51729	-5.2325	0.000698866	0.00764087	-0.303222
EXPH5	1.03042	5.15133	5.23174	0.000699529	0.00764087	-0.304217
LOC643733	-1.24284	4.66678	-5.23121	0.000699993	0.00764087	-0.304912
TLCD1	1.7078	5.27091	5.23052	0.0007006	0.00764087	-0.305821
KREMEN2	1.13751	5.92513	5.22788	0.000702923	0.00765961	-0.309293
TOM1L1	1.02978	6.66892	5.22289	0.000707335	0.00767539	-0.315855
SESN2	-1.3157	7.34807	-5.22232	0.000707841	0.00767539	-0.316606
CYP4B1	2.67955	6.02532	5.2223	0.000707861	0.00767539	-0.316635
RGMB	-1.27091	5.87015	-5.22227	0.000707884	0.00767539	-0.31667
SLMO2	1.08239	6.58392	5.22226	0.000707891	0.00767539	-0.31668
LRRC17	-2.04998	5.79541	-5.21898	0.000710813	0.00769302	-0.321
CA12	1.23955	5.83505	5.21115	0.000717836	0.00773811	-0.331313
NID1	-1.01824	6.17263	-5.21072	0.000718222	0.00773819	-0.331875
SESN1	-1.49087	7.75376	-5.20803	0.000720654	0.00775037	-0.335422
MRGPRF	-1.03075	6.92633	-5.20803	0.000720657	0.00775037	-0.335426
ADAMTS9-AS2	-2.30458	5.27666	-5.2078	0.000720867	0.00775037	-0.335732
MITF	-1.25423	6.11566	-5.20711	0.000721487	0.00775296	-0.336633
RUFY3	-1.47023	6.8525	-5.20404	0.000724281	0.0077778	-0.340687
LPAR2	1.00923	6.37242	5.19937	0.000728548	0.00779607	-0.346847
PTPN14	1.04433	6.94285	5.19732	0.000730429	0.00780396	-0.349552
PFN1	1.53351	9.86805	5.19564	0.000731975	0.00781013	-0.351769
NUDT2	-1.01363	6.96152	-5.19421	0.000733292	0.00781479	-0.353656
GNA14	-1.61629	5.11734	-5.18998	0.000737204	0.00784358	-0.359236
NUDT19	1.07191	7.78636	5.18835	0.000738722	0.00785564	-0.361393
DUS1L	1.23611	8.25609	5.18697	0.00074	0.00786515	-0.363206
MANF	1.12924	8.44605	5.18497	0.00074187	0.00787684	-0.365853
MTX1	1.13188	8.49482	5.18452	0.000742294	0.00787725	-0.366452
SNX10	1.9895	5.6005	5.18255	0.000744139	0.0078875	-0.369056
LRRN1	-1.08298	4.17564	-5.1824	0.000744274	0.0078875	-0.369246
TMEM102	1.06571	4.62759	5.18225	0.000744417	0.0078875	-0.369448
SPATA17	1.39124	4.40401	5.1791	0.000747375	0.00791475	-0.373608
PNKD	1.09481	6.73305	5.17758	0.000748809	0.00792584	-0.375618
STIL	1.41402	6.51663	5.1744	0.000751816	0.00794386	-0.379821
C12orf75	2.1912	5.55651	5.17208	0.00075402	0.00795219	-0.382892
PLA2G4A	-1.74593	5.52316	-5.1676	0.000758295	0.00798043	-0.388822
NRK	-2.46236	6.4451	-5.16723	0.000758648	0.00798043	-0.38931
WNT4	-1.8757	6.07207	-5.16586	0.000759967	0.0079872	-0.391132
RBM47	1.12562	5.63249	5.16442	0.000761343	0.0079912	-0.393029
RAD54L	1.53353	5.26769	5.16413	0.000761625	0.0079912	-0.393417
CEP120	-1.18415	5.89152	-5.16285	0.000762855	0.00800001	-0.39511
SAMD12	1.5496	5.07182	5.1611	0.000764549	0.00801366	-0.397436
FAM132A	1.15959	4.65804	5.16056	0.00076507	0.00801384	-0.39815
PLEC	1.06007	6.90861	5.15638	0.00076912	0.00803688	-0.403689
HIST1H2BD	1.47981	8.12631	5.15496	0.000770498	0.00804716	-0.405565
FXYD6	-1.95317	8.89066	-5.1502	0.000775152	0.00808751	-0.411882
TTC8	-1.72294	8.50694	-5.1447	0.000780559	0.00812102	-0.419173
MAGEE1	-1.0619	6.20641	-5.14165	0.000783578	0.00814634	-0.423221
AURKB	1.43611	4.62773	5.14015	0.000785072	0.00815773	-0.42522
STYXL1	1.14054	7.17386	5.13828	0.000786932	0.00817291	-0.427702
TMEM98	-1.62429	9.41851	-5.13774	0.000787473	0.00817437	-0.428422
FOXO1	-1.21528	6.75701	-5.13528	0.000789928	0.00819155	-0.431688
IKZF5	-1.11953	6.16462	-5.13369	0.000791523	0.00819978	-0.433803
NME1	1.6584	9.12979	5.1305	0.000794729	0.00822882	-0.438042
WDR47	-1.15901	6.91884	-5.12842	0.000796825	0.00824218	-0.440806
RAD9A	1.0756	7.44284	5.12796	0.00079729	0.00824218	-0.441417
FBXL7	-1.37098	8.16956	-5.12762	0.000797631	0.00824218	-0.441865
TMPRSS3	2.80573	6.66925	5.12687	0.000798387	0.0082458	-0.44286
PPAP2C	2.0349	5.53563	5.12563	0.000799649	0.00824789	-0.444516
TBC1D24	1.22429	5.65936	5.12437	0.000800925	0.00824789	-0.446188
DNA2	1.45282	6.22591	5.1235	0.000801811	0.00824789	-0.447348
RAB11FIP4	1.30814	5.48076	5.121	0.000804358	0.00826506	-0.450675
BRI3BP	1.73869	7.60007	5.12067	0.000804692	0.00826506	-0.45111
LOC100507311	-2.93035	8.7086	-5.11836	0.000807056	0.00828103	-0.454187
HLA-DMA	2.45671	8.04442	5.1155	0.000809992	0.0083004	-0.457995
SLAMF8	1.4944	5.08086	5.10734	0.000818428	0.00835334	-0.468863
TFAP2C	1.29262	5.42659	5.10679	0.000819003	0.00835334	-0.469599
HCK	1.87383	5.57797	5.10549	0.000820363	0.00836304	-0.47134
ETV4	1.61816	6.39938	5.09692	0.000829342	0.00842874	-0.482757
BYSL	1.06622	7.16511	5.09659	0.000829691	0.00842874	-0.483199
GNA15	1.14317	4.67335	5.0898	0.000836898	0.00847813	-0.49227
PARP3	1.05181	5.70073	5.08967	0.000837039	0.00847813	-0.492447
SETBP1	-1.32637	7.11733	-5.08802	0.0008388	0.0084853	-0.494651
EPSTI1	2.07762	5.96391	5.0863	0.000840638	0.00849356	-0.496947
DNAJB14	-1.90168	7.47762	-5.08493	0.000842099	0.00850412	-0.498768
PELI1	1.25972	6.79769	5.08389	0.000843214	0.00851118	-0.500156
PLK1	1.05352	4.86327	5.08293	0.000844254	0.00851328	-0.501449
CYP11B2	1.06609	5.66106	5.08009	0.000847309	0.00853567	-0.505237
ZFAND5	-1.1051	6.54289	-5.07913	0.00084835	0.00853986	-0.506525
CDK2AP1	1.5095	10.1153	5.07894	0.00084856	0.00853986	-0.506785
HMGB3	1.25239	6.62014	5.07665	0.000851033	0.00855151	-0.509837
PLBD1	1.71819	7.32249	5.07565	0.000852118	0.00855463	-0.511173
MICALL1	1.28761	6.24518	5.07378	0.000854152	0.00856216	-0.513674
LSR	2.8006	7.33026	5.07343	0.000854542	0.00856216	-0.514152
LRFN5	-1.81515	4.64519	-5.07253	0.000855522	0.00856778	-0.515354
AKT1	1.14899	7.79064	5.07192	0.000856191	0.00857029	-0.516175
CHI3L1	3.31849	6.77675	5.07076	0.000857454	0.00857873	-0.517721
UPK1B	2.45752	5.72632	5.06947	0.000858871	0.00858771	-0.519453
ENOX1	-1.3283	6.02532	-5.06734	0.000861201	0.0085962	-0.522294
LRRC1	1.19598	5.97498	5.0608	0.000868423	0.00865884	-0.531053
GPT2	1.53046	5.56364	5.05969	0.000869658	0.00866692	-0.532543
MBOAT1	1.30289	7.85327	5.05846	0.000871025	0.00867633	-0.534191
GOLT1A	1.05289	5.14889	5.05773	0.000871838	0.0086802	-0.535169
FAM172A	-1.00056	6.20416	-5.05346	0.000876606	0.00871494	-0.540889
PLAU	1.91326	5.9644	5.05218	0.000878049	0.00871956	-0.542615
SFN	2.62912	7.01945	5.04556	0.000885516	0.00877794	-0.551497
MAFB	1.45511	8.51382	5.04282	0.000888624	0.00879596	-0.555171
PAPSS2	-1.31518	7.61632	-5.03801	0.000894109	0.0088289	-0.561626
KRT8	3.26048	9.45118	5.03152	0.000901574	0.00887691	-0.570346
CCDC50	-1.03881	7.21181	-5.03055	0.000902694	0.00888326	-0.571648
TNFRSF12A	1.76168	7.20845	5.03021	0.000903088	0.00888326	-0.572106
CCL28	2.33605	5.80316	5.02901	0.000904479	0.00889267	-0.57372
PDZK1IP1	3.32739	7.20841	5.02838	0.00090521	0.00889558	-0.574567
CD74	1.24367	7.34543	5.02593	0.000908057	0.00890644	-0.577861
AGRN	1.25756	6.75871	5.02478	0.000909403	0.00891537	-0.579414
PTGES	1.07738	5.98972	5.02227	0.000912337	0.0089313	-0.582793
HLA-C	1.08583	10.8407	5.02084	0.000914003	0.00894333	-0.584706
GSTK1	1.12995	9.01449	5.01371	0.00092241	0.00900406	-0.594309
SNAI2	-2.63158	8.01489	-5.01098	0.000925651	0.00902062	-0.597987
EHF	2.43669	6.03652	5.00907	0.000927927	0.00903206	-0.600563
PGM2L1	1.43131	5.65703	5.00645	0.00093105	0.00904711	-0.604088
C15orf52	1.7798	6.49263	5.00342	0.000934684	0.00906763	-0.608173
HOXD1	1.49878	4.83356	5.00175	0.000936691	0.00908279	-0.610422
LOC101927752	-1.21892	6.43034	-4.99838	0.000940758	0.00910255	-0.614967
TOPORS	-1.35555	7.49837	-4.99786	0.000941398	0.00910255	-0.615679
ARHGAP21	-1.318	7.45695	-4.99519	0.000944634	0.00912953	-0.619279
ADRB3	-1.20958	5.48585	-4.99468	0.000945247	0.00913071	-0.61996
HSD11B1	-2.50966	7.0628	-4.99399	0.000946095	0.00913071	-0.6209
ARRDC3	-1.93546	8.65362	-4.99233	0.000948118	0.00913575	-0.62314
VGLL3	-1.87969	5.35346	-4.99173	0.00094885	0.00913575	-0.623949
FAAH2	1.63688	6.29532	4.99108	0.000949647	0.00913913	-0.62483
C12orf56	2.17541	4.89771	4.98999	0.000950977	0.00914762	-0.626298
MAP7D1	1.01729	7.29434	4.98151	0.000961419	0.00921773	-0.637751
ACTR3C	1.09823	4.78514	4.97879	0.0009648	0.00924148	-0.641433
MMEL1	1.43111	6.85628	4.97754	0.000966357	0.00925207	-0.643124
RCC1	1.02963	6.76399	4.97497	0.000969556	0.00927031	-0.64659
MUT	-1.13542	8.11093	-4.97284	0.000972232	0.00929092	-0.64948
FGF18	1.59525	5.35782	4.97046	0.000975215	0.00930683	-0.652693
EXO1	1.22839	4.65168	4.97024	0.000975489	0.00930683	-0.652988
MGLL	1.93558	7.2736	4.9622	0.000985674	0.00937123	-0.663882
PDGFD	-1.92815	6.92916	-4.95817	0.000990817	0.00940701	-0.669339
HLA-DMB	2.14688	8.07426	4.95496	0.00099493	0.00944168	-0.673684
TYK2	1.01596	8.57071	4.95068	0.00100046	0.00947929	-0.679498
PITPNM1	1.21513	6.44589	4.9414	0.00101254	0.00956123	-0.69208
GHR	-2.35606	5.96331	-4.93963	0.00101487	0.00957495	-0.69449
PHLDA2	1.09766	4.38156	4.93781	0.00101726	0.00958438	-0.696963
ABCB4	-1.01789	4.23026	-4.9372	0.00101806	0.00958563	-0.697789
LOC100506119	2.59296	7.17403	4.93443	0.00102172	0.00960684	-0.701553
ZBTB42	2.28064	5.79086	4.93124	0.00102595	0.009633	-0.705885
MCAM	1.82429	6.61781	4.92263	0.00103748	0.0097129	-0.717599
LRRK2	-2.22494	5.32965	-4.92229	0.00103793	0.0097129	-0.718057
EPS8	-1.45711	8.66725	-4.92184	0.00103854	0.0097129	-0.718668
STEAP1	1.58272	6.33825	4.92144	0.00103907	0.0097129	-0.719205
PRRX1	-2.1835	6.00883	-4.92136	0.00103918	0.0097129	-0.719315
APOA1BP	1.23636	9.13168	4.91548	0.00104714	0.00976218	-0.727323
VNN1	1.10213	3.9859	4.91202	0.00105186	0.00979565	-0.732037
SCN7A	-2.30105	5.79629	-4.90568	0.00106056	0.00986319	-0.740673
RASSF3	-1.12876	6.74032	-4.90334	0.00106379	0.00988118	-0.743863
GNE	-1.25889	6.87494	-4.89972	0.00106881	0.00991742	-0.748804
SH3BP5L	1.02886	6.14378	4.89535	0.0010749	0.00995131	-0.754756
SPINT1	2.28416	6.72345	4.89371	0.00107719	0.00996805	-0.756994
EYA2	2.97613	6.78156	4.89328	0.0010778	0.00996917	-0.757586
HYOU1	1.44821	8.39822	4.88627	0.00108767	0.0100417	-0.767149
FCHO1	1.34612	6.49416	4.88532	0.00108902	0.0100457	-0.768448
LINC01215	1.15555	3.844	4.88414	0.0010907	0.0100567	-0.770064
EGLN3	1.37113	4.80342	4.87558	0.00110295	0.010147	-0.781769
ZNF300P1	-2.73372	5.69471	-4.87383	0.00110545	0.0101576	-0.784151
IFI6	2.27873	7.69628	4.87261	0.00110721	0.0101585	-0.785818
NCAPH	1.27824	4.48188	4.87013	0.0011108	0.0101823	-0.78921
LOC101928076	1.26805	4.3897	4.86751	0.0011146	0.0102081	-0.792795
SCNN1A	1.58224	7.04545	4.86531	0.00111781	0.010219	-0.795811
C4orf32	-1.21593	4.46396	-4.865	0.00111827	0.010219	-0.796241
TMEM184B	1.05451	7.03585	4.86488	0.00111844	0.010219	-0.796401
CPNE2	1.61956	7.48447	4.86425	0.00111937	0.010219	-0.797266
MAN2B1	1.61922	7.39692	4.86399	0.00111975	0.010219	-0.797621
IRAK1BP1	-1.09566	5.01684	-4.86271	0.00112162	0.01023	-0.799376
RMI2	1.68103	7.03998	4.85924	0.00112671	0.0102547	-0.804122
ETFDH	-1.01359	6.05934	-4.85539	0.0011324	0.0102972	-0.8094
CDC7	2.14242	5.59791	4.85136	0.00113837	0.0103424	-0.814919
RPP38	1.36101	7.21119	4.85003	0.00114035	0.0103558	-0.816743
MORC4	-1.1994	7.30806	-4.84908	0.00114177	0.0103641	-0.818044
PKIA	-1.49287	4.77429	-4.84339	0.0011503	0.0104138	-0.825853
TSPAN8	-2.50891	9.42425	-4.84292	0.00115102	0.0104157	-0.826505
CELF6	-1.32077	5.69651	-4.83969	0.0011559	0.0104506	-0.83094
TMEM255A	-2.90168	6.09825	-4.8376	0.00115906	0.0104653	-0.833806
ANXA2	1.05878	9.45056	4.83617	0.00116124	0.0104803	-0.83577
SORT1	1.82077	6.08759	4.83178	0.00116793	0.0105175	-0.841795
MPZL2	1.65485	5.26025	4.83022	0.00117032	0.0105308	-0.84394
LY6E	1.97822	9.39157	4.83014	0.00117044	0.0105308	-0.844045
ACSM3	-1.92534	6.5242	-4.82826	0.00117333	0.0105429	-0.846632
RNASEL	-1.18702	6.05088	-4.82606	0.00117672	0.0105642	-0.849661
PDZRN3-AS1	-1.25739	5.16985	-4.82429	0.00117945	0.010584	-0.852088
ATL1	-1.27183	6.49311	-4.82046	0.00118539	0.0106175	-0.857352
COL9A2	1.49485	5.61206	4.82022	0.00118577	0.0106175	-0.857694
ZNF25	-1.00756	6.83255	-4.81544	0.00119324	0.0106656	-0.864273
ARL4C	2.38813	6.75688	4.81453	0.00119466	0.010669	-0.865522
PENK	-1.44557	5.0479	-4.81356	0.00119617	0.0106779	-0.866851
KIF14	1.79046	4.9036	4.81154	0.00119935	0.0107016	-0.869634
CCNO	1.30992	5.57672	4.80949	0.00120259	0.0107212	-0.872463
CAMK2N1	-1.52856	5.80653	-4.80828	0.0012045	0.0107335	-0.874127
TGFBI	2.1717	8.70522	4.80752	0.00120571	0.0107396	-0.875177
MPP7	1.02026	4.7111	4.8065	0.00120732	0.0107493	-0.876578
DHRS3	1.34685	8.50331	4.80522	0.00120936	0.010758	-0.878344
CORO2A	1.74138	5.42843	4.80358	0.00121196	0.010768	-0.8806
NDC1	1.60418	6.65444	4.8018	0.0012148	0.0107751	-0.883047
FAM129B	1.27276	7.17105	4.79566	0.00122465	0.0108422	-0.891515
PCK2	1.80896	6.57198	4.79475	0.00122612	0.0108446	-0.892778
NCEH1	1.56772	4.26012	4.78851	0.00123623	0.0109066	-0.901382
CACNB2	-1.54112	5.35977	-4.78821	0.00123672	0.0109066	-0.9018
SOWAHC	-1.1465	7.74206	-4.7862	0.00123999	0.0109213	-0.904572
PUS1	1.40998	6.70559	4.78492	0.00124208	0.0109303	-0.906335
LOC101926907	2.05404	5.32496	4.78349	0.00124443	0.0109422	-0.908312
LINC00478	-1.41394	5.92843	-4.78079	0.00124887	0.0109527	-0.912052
MFN1	1.09757	7.02307	4.77358	0.0012608	0.0110286	-0.922014
KIAA1804	2.20064	6.72729	4.76694	0.00127189	0.0110739	-0.931199
CDKN2A	2.1686	6.00603	4.76626	0.00127303	0.0110741	-0.93214
PPIC	1.11637	7.34755	4.7629	0.00127869	0.0111186	-0.936789
ARHGAP4	1.09238	5.93043	4.76093	0.00128201	0.0111333	-0.939508
SECISBP2	-1.07244	7.62224	-4.7596	0.00128428	0.0111399	-0.941357
SYT6	-2.21674	5.68883	-4.75598	0.00129043	0.0111779	-0.946367
BEX2	-1.13733	9.46371	-4.75449	0.00129297	0.0111905	-0.948432
ZNF711	-1.24786	5.62156	-4.75345	0.00129475	0.0111942	-0.949867
PPM1K	-1.54278	5.62659	-4.75264	0.00129614	0.0111942	-0.950996
ITGA7	1.4372	5.96685	4.75042	0.00129995	0.0112176	-0.954075
OSBPL3	1.55239	6.26249	4.74703	0.00130578	0.0112585	-0.958766
CENPE	1.61448	4.39495	4.74381	0.00131137	0.0112934	-0.963241
ZNF274	-1.17731	7.56222	-4.74373	0.00131149	0.0112934	-0.963341
CELF2	-1.29568	6.42359	-4.74086	0.00131649	0.0113269	-0.967324
LAMA5	2.54861	8.4228	4.74044	0.00131723	0.0113285	-0.967915
TMEM45B	1.81313	5.43224	4.73901	0.00131973	0.0113357	-0.969899
LPCAT1	1.45522	8.38791	4.73532	0.00132618	0.0113663	-0.97501
B4GALT5	1.41562	8.66449	4.73444	0.00132773	0.0113663	-0.976239
HRASLS	1.52722	4.66994	4.73444	0.00132774	0.0113663	-0.976244
PLEKHG4B	1.88417	5.77288	4.73386	0.00132876	0.0113703	-0.97705
TMEM128	-1.06338	7.5529	-4.73057	0.00133455	0.0114055	-0.981605
WFDC21P	1.17821	5.82189	4.7245	0.00134533	0.0114714	-0.990043
NPR1	1.66879	7.99372	4.72401	0.00134621	0.0114717	-0.990729
CDK16	1.14122	7.05111	4.72282	0.00134835	0.0114803	-0.992387
OSR2	-2.58578	6.76287	-4.71867	0.00135579	0.0115288	-0.998157
HP	3.67449	8.17689	4.71776	0.00135742	0.0115288	-0.99942
DSP	3.19606	8.95651	4.71495	0.00136249	0.0115587	-1.00333
PLVAP	1.01306	5.64793	4.71455	0.00136321	0.0115587	-1.00388
RIPK2	1.02173	6.18133	4.71176	0.00136827	0.011592	-1.00776
C1QA	2.12689	7.41773	4.70759	0.00137587	0.0116468	-1.01357
GSPT2	-1.52743	6.75466	-4.70579	0.00137917	0.0116699	-1.01608
PRR15L	2.16001	6.27491	4.70378	0.00138286	0.0116934	-1.01888
NMI	1.07233	8.87686	4.70139	0.00138725	0.0117207	-1.0222
PDK4	-2.57418	6.49757	-4.70128	0.00138746	0.0117207	-1.02236
MLLT3	-1.28857	5.76741	-4.7003	0.00138926	0.011731	-1.02372
CAPS2	-1.32394	4.24614	-4.69919	0.00139131	0.0117435	-1.02526
ARHGDIB	1.11107	7.37481	4.69814	0.00139326	0.011746	-1.02674
STXBP5L	-1.32707	4.14049	-4.6981	0.00139333	0.011746	-1.02679
GPR160	3.03729	5.67633	4.69761	0.00139424	0.0117488	-1.02747
CX3CL1	1.10699	5.53083	4.69276	0.00140326	0.0118085	-1.03423
TMEM200B	-1.74127	6.88797	-4.69257	0.00140362	0.0118085	-1.0345
VAT1	-1.03407	9.2098	-4.6914	0.00140582	0.011822	-1.03614
CLDN10	3.13164	6.75134	4.68915	0.00141003	0.0118477	-1.03927
ZSWIM5	-1.86145	5.91835	-4.68872	0.00141083	0.0118495	-1.03986
ELF3	3.60845	7.34579	4.68841	0.00141142	0.0118496	-1.0403
LINC00260	1.33639	6.32412	4.68342	0.00142082	0.0119139	-1.04726
DAPL1	3.91289	7.63034	4.68187	0.00142377	0.0119289	-1.04943
ENO2	1.96142	6.98958	4.67779	0.00143153	0.0119743	-1.05513
DNAJC18	-1.19841	5.37381	-4.67567	0.00143558	0.0120033	-1.05809
MSH2	1.28654	6.6563	4.66887	0.00144866	0.0120727	-1.0676
PIK3R3	1.30929	5.84465	4.66859	0.00144919	0.0120727	-1.06798
SBF2	-1.30827	6.14585	-4.66454	0.00145704	0.0121075	-1.07364
RASAL3	1.19374	6.38959	4.6643	0.00145751	0.0121075	-1.07398
MGC24103	-1.92093	9.27206	-4.66364	0.0014588	0.0121084	-1.0749
LOC202025	-1.17476	5.32336	-4.65555	0.00147464	0.0122036	-1.08623
IGFBP2	1.18803	10.1148	4.65534	0.00147505	0.0122036	-1.08652
IRF7	1.74827	6.76995	4.65469	0.00147634	0.0122044	-1.08743
KLK6	3.87276	7.28386	4.65103	0.00148358	0.012243	-1.09256
C1QB	2.43765	7.43625	4.64824	0.00148913	0.0122754	-1.09647
MEOX1	1.48106	4.47578	4.64152	0.00150257	0.0123713	-1.10589
PROS1	-1.05042	8.56405	-4.6367	0.00151229	0.0124463	-1.11264
SLC19A2	-2.45175	6.56752	-4.63289	0.00152002	0.0124898	-1.11799
DRAP1	1.05015	7.4569	4.62562	0.0015349	0.0125677	-1.12819
LINC00883	-1.94593	5.95656	-4.62526	0.00153565	0.0125677	-1.1287
ZNF367	1.5918	5.08982	4.62418	0.00153788	0.0125677	-1.13023
LEPREL4	1.15899	6.93689	4.62364	0.001539	0.0125677	-1.13098
ELOVL6	1.04453	4.8993	4.62015	0.00154622	0.0126017	-1.13589
WFIKKN2	-2.03446	5.7606	-4.61991	0.00154671	0.0126017	-1.13622
MOB3B	-1.81723	7.20975	-4.61747	0.00155177	0.012629	-1.13964
EFS	-1.19405	6.82406	-4.61071	0.00156592	0.0127037	-1.14916
CNFN	1.24939	4.86669	4.60973	0.00156798	0.0127154	-1.15053
SLC7A7	1.33023	7.00726	4.60917	0.00156917	0.01272	-1.15133
SMAD5	-1.47048	7.1243	-4.60853	0.00157051	0.0127258	-1.15222
CRYL1	-1.02571	6.80926	-4.59812	0.00159263	0.0128288	-1.16687
POSTN	1.21874	4.25666	4.59068	0.00160865	0.0129272	-1.17736
CTSS	1.49055	5.97552	4.58982	0.00161052	0.0129272	-1.17858
CXCL17	3.42247	6.3698	4.58774	0.00161503	0.0129272	-1.18151
LAMTOR3	-1.20543	7.75371	-4.58662	0.00161747	0.0129322	-1.18309
TOR1AIP1	-1.09765	5.74672	-4.58613	0.00161854	0.0129357	-1.18378
FUT2	1.03019	5.76163	4.58074	0.00163033	0.0130096	-1.19138
HNRNPAB	1.09176	9.95168	4.57797	0.00163642	0.0130277	-1.19529
PCSK2	-2.16594	4.80997	-4.57598	0.00164081	0.0130373	-1.19809
PCNA	1.06043	8.83598	4.57553	0.00164181	0.0130373	-1.19873
CXCL16	2.21112	7.20873	4.57105	0.00165176	0.0130988	-1.20506
NABP2	1.02658	6.24149	4.5691	0.0016561	0.0131274	-1.20781
XK	1.40609	3.7966	4.56708	0.00166063	0.0131426	-1.21067
ABCA6	-2.88658	5.27835	-4.56697	0.00166087	0.0131426	-1.21083
LAPTM5	2.07157	8.13188	4.56523	0.00166477	0.0131612	-1.21328
DNAJB13	1.68898	5.47878	4.5619	0.00167227	0.0132089	-1.21799
ZNF542P	-1.09396	5.69601	-4.56169	0.00167274	0.0132089	-1.21828
MAD2L1	1.0513	4.66823	4.55525	0.00168736	0.0132799	-1.2274
SASH3	1.16493	5.3401	4.55158	0.00169574	0.0133288	-1.23259
SCML1	-1.40969	6.91983	-4.55006	0.00169923	0.013346	-1.23474
HCP5	1.38445	5.62352	4.54944	0.00170066	0.0133519	-1.23562
RYR2	-1.14072	4.85864	-4.54622	0.00170808	0.0133847	-1.24018
C6orf132	1.71652	5.33512	4.53998	0.00172255	0.013462	-1.24902
RPN1	1.24892	8.99729	4.53814	0.00172685	0.0134853	-1.25163
LRRC55	1.16531	4.13921	4.53716	0.00172913	0.0134979	-1.25301
ALYREF	1.22392	6.48622	4.53613	0.00173155	0.0135065	-1.25448
RBL2	-1.10523	7.75418	-4.53338	0.001738	0.0135516	-1.25837
SOX17	3.74007	6.91607	4.53307	0.00173875	0.0135523	-1.25882
CHST7	-2.71441	5.95229	-4.53087	0.00174393	0.0135823	-1.26194
SPOCK3	-2.12222	4.15427	-4.52667	0.00175389	0.0136391	-1.2679
THY1	2.26204	7.36445	4.52566	0.00175627	0.0136525	-1.26932
BLOC1S6	-1.08349	8.07094	-4.5159	0.00177968	0.0137871	-1.28319
OLFML2B	2.01169	5.50273	4.51535	0.00178101	0.0137871	-1.28397
CPT1C	1.23873	5.38103	4.51219	0.00178866	0.0138307	-1.28846
ADORA3	1.03602	4.5624	4.5107	0.00179227	0.0138481	-1.29057
AHR	1.39168	8.46217	4.50778	0.0017994	0.0138875	-1.29472
TIMMDC1	1.09977	9.17368	4.49831	0.00182271	0.0140356	-1.3082
CDH6	1.98942	5.28955	4.49036	0.00184251	0.0141349	-1.31951
RANBP2	-1.19312	8.11444	-4.48992	0.00184362	0.0141377	-1.32014
SDPR	-1.86515	5.5952	-4.48652	0.00185216	0.0141733	-1.32499
CCDC137	1.29555	7.0526	4.48626	0.00185282	0.0141733	-1.32536
DKFZP434L187	-1.11072	4.70128	-4.48297	0.00186113	0.0142297	-1.33004
SYK	1.98659	6.16622	4.48234	0.00186274	0.0142314	-1.33095
CYP39A1	-1.50942	5.36328	-4.48036	0.00186775	0.014259	-1.33376
DNAJC27	-1.53097	5.55215	-4.47592	0.00187909	0.0143209	-1.3401
WISP2	-2.47973	7.14373	-4.47581	0.00187935	0.0143209	-1.34025
PIP5K1A	1.02061	5.9913	4.47239	0.00188813	0.0143717	-1.34513
BC048103 /// CSGALNACT1	-2.74164	6.39065	-4.46999	0.00189432	0.0144009	-1.34855
AMIGO2	-1.86371	8.49485	-4.46982	0.00189478	0.0144009	-1.3488
CLIC2	-2.08151	5.59997	-4.46643	0.00190354	0.0144398	-1.35363
SYTL1	2.38694	6.30096	4.46641	0.00190361	0.0144398	-1.35367
MYO1F	1.36754	6.05274	4.4638	0.00191039	0.014473	-1.35739
TWIST1	-1.82094	6.43107	-4.46344	0.00191134	0.014473	-1.35791
TDRP	-1.00478	5.96195	-4.45771	0.00192634	0.0145611	-1.3661
BNC2	-1.66282	7.45587	-4.45587	0.00193117	0.0145908	-1.36872
SPON1	1.63358	8.13882	4.44962	0.00194773	0.0146954	-1.37766
MTUS1	-1.70276	7.41385	-4.44843	0.00195092	0.0147021	-1.37937
KIF23	1.4816	4.52091	4.44842	0.00195094	0.0147021	-1.37938
TMEM254	1.01512	6.28241	4.44695	0.00195487	0.0147209	-1.38148
CITED2	-1.29138	6.85658	-4.44593	0.00195757	0.0147287	-1.38293
DNAJB9	-2.0065	6.91377	-4.4451	0.0019598	0.0147328	-1.38412
IRS1	-1.47642	7.18092	-4.44501	0.00196006	0.0147328	-1.38426
ID2	-1.30533	8.49072	-4.43927	0.0019755	0.0148109	-1.39248
C11orf83	1.01131	7.42349	4.4379	0.00197921	0.0148332	-1.39444
ZDBF2	-1.29066	4.96803	-4.4341	0.00198952	0.0148886	-1.39988
DHRS2	-1.80236	8.14841	-4.43219	0.00199472	0.0149115	-1.40261
RHOJ	-1.50285	4.98716	-4.4294	0.00200234	0.0149627	-1.4066
ATP5G1	1.17452	8.96773	4.42468	0.00201535	0.0150106	-1.41338
DOCK10	-1.59254	4.97944	-4.42185	0.00202316	0.0150528	-1.41743
MMD	1.16728	5.78399	4.42183	0.00202322	0.0150528	-1.41746
RSL24D1	-1.21094	9.51605	-4.41884	0.00203154	0.0150982	-1.42175
FN1	1.462	7.89986	4.41533	0.00204134	0.0151325	-1.42679
EPS8L1	1.79011	7.12696	4.41329	0.00204706	0.0151695	-1.42972
CPE	-1.41125	7.98934	-4.41203	0.0020506	0.0151817	-1.43152
RAB17	1.19016	6.50575	4.40996	0.00205642	0.0152058	-1.43449
SERPINI1	-1.20817	5.44877	-4.40357	0.00207455	0.0153121	-1.44367
TPM4	1.26274	6.72102	4.40164	0.00208006	0.0153252	-1.44645
RFC4	1.19448	8.19414	4.39978	0.00208539	0.0153503	-1.44913
TRPS1	1.04687	7.07501	4.39765	0.00209148	0.0153813	-1.45218
DKFZP761C1711	-1.02214	3.75916	-4.39616	0.00209577	0.015391	-1.45433
TBC1D2	1.37324	5.78888	4.39425	0.00210128	0.015419	-1.45707
ZNF783	1.00336	7.2438	4.3934	0.00210372	0.0154273	-1.45829
CDH1	1.53075	6.55517	4.38436	0.00213006	0.0155424	-1.47131
IDO1	2.5511	6.3596	4.37711	0.00215141	0.0156703	-1.48174
PPP1R14A	-1.78246	6.95587	-4.37628	0.00215387	0.0156826	-1.48293
PRTG	-1.17913	5.19082	-4.37563	0.0021558	0.0156911	-1.48387
ADRA2C	1.36155	6.25613	4.37482	0.00215822	0.0156975	-1.48505
GLIPR2	1.02068	6.04888	4.37125	0.00216886	0.0157637	-1.49019
ZNF101	1.09324	5.15887	4.37042	0.00217133	0.0157704	-1.49138
SEC61A1	1.00791	7.7264	4.36961	0.00217375	0.0157705	-1.49255
C1QTNF4	-2.10837	6.03119	-4.36864	0.00217666	0.0157812	-1.49395
ATG4C	-1.18459	6.29855	-4.36346	0.00219227	0.0158607	-1.50143
ZAK	-1.64422	7.45496	-4.3622	0.00219609	0.0158812	-1.50325
SH3BGRL3	1.34553	7.94736	4.35579	0.00221557	0.0159855	-1.51249
HOXD8	-1.11981	7.55582	-4.35019	0.00223277	0.0160638	-1.52057
HOMER2	1.54701	4.95261	4.34984	0.00223386	0.0160638	-1.52108
AGPAT2	1.00532	6.7637	4.34964	0.00223449	0.0160638	-1.52138
SLC16A9	-1.58114	8.62046	-4.34838	0.00223837	0.0160719	-1.52319
ATHL1	3.23189	7.14851	4.34826	0.00223875	0.0160719	-1.52337
CDKN1C	-1.26702	7.7919	-4.34506	0.00224867	0.0160971	-1.528
PCDHB15	-1.79791	3.99461	-4.34052	0.00226282	0.0161539	-1.53456
ATP5C1	1.05058	10.0312	4.33932	0.00226656	0.0161694	-1.53628
PDRG1	1.18807	7.69907	4.33842	0.0022694	0.016184	-1.5376
DPAGT1	1.10299	7.46052	4.33418	0.00228274	0.0162565	-1.54372
PPA1	1.31822	10.8503	4.32915	0.00229868	0.0163529	-1.551
KIAA0895	-1.69063	5.37373	-4.32845	0.00230089	0.016363	-1.55201
MTHFD2	1.61147	5.98902	4.32748	0.00230401	0.0163648	-1.55342
SKAP1	1.60228	6.09289	4.32442	0.00231378	0.0163977	-1.55785
ABCA11P	-1.40867	5.88187	-4.31812	0.00233408	0.0164844	-1.56698
H2BFS	1.54108	7.91306	4.31625	0.0023401	0.0165212	-1.56968
ZNF512B	1.03727	7.248	4.31574	0.00234177	0.0165273	-1.57043
B3GNT2	1.0093	5.16414	4.31502	0.00234411	0.0165381	-1.57147
RGS2	-2.90711	9.34421	-4.31176	0.00235474	0.0165845	-1.5762
TYROBP	1.85736	7.99829	4.31143	0.0023558	0.0165863	-1.57667
SPHKAP	-2.84774	5.66084	-4.30427	0.00237933	0.0166773	-1.58706
HOXB7	1.79664	5.89993	4.30083	0.00239071	0.0167341	-1.59205
BACH2	-1.64704	5.61477	-4.29036	0.00242572	0.0169271	-1.60725
TLR1	-1.52832	5.11502	-4.28986	0.00242742	0.0169332	-1.60799
LOC101928554	2.70167	4.8503	4.28726	0.00243621	0.0169632	-1.61176
BCAT1	2.72006	7.62665	4.28687	0.00243753	0.0169632	-1.61233
KRT80	1.02483	6.05652	4.28545	0.00244234	0.0169794	-1.61439
OAS1	1.74333	6.5063	4.27758	0.00246921	0.0171013	-1.62583
OMD	-1.73453	4.24245	-4.27669	0.00247229	0.017112	-1.62714
PCP4	2.33607	6.67236	4.2742	0.00248087	0.017154	-1.63076
PDCD2L	1.1677	7.20552	4.27338	0.0024837	0.0171678	-1.63195
ZBTB21	-1.77693	7.90099	-4.27286	0.0024855	0.0171744	-1.63271
VPS72	1.09141	8.16455	4.27248	0.00248681	0.0171776	-1.63326
HIST1H2BE	1.21271	6.31475	4.27156	0.00249	0.0171938	-1.6346
SLC27A3	1.15019	7.04821	4.27034	0.00249424	0.0171999	-1.63638
CAP1	1.07342	10.1875	4.26158	0.00252488	0.0173761	-1.64914
TOPBP1	1.12401	7.79212	4.25487	0.00254862	0.0174982	-1.65892
MYOF	1.39634	7.88743	4.2533	0.00255421	0.0175145	-1.66121
PRKX	2.34805	6.40475	4.25324	0.00255441	0.0175145	-1.66129
PCYOX1	-1.37596	7.5627	-4.2511	0.00256205	0.0175606	-1.66441
CFB	2.72469	7.29624	4.24126	0.0025975	0.0177445	-1.67878
ARPC5L	1.05938	7.36746	4.23903	0.00260559	0.0177879	-1.68203
DYNLRB2	-2.05387	5.07792	-4.23596	0.0026168	0.0178391	-1.68651
FAM200B	-1.03078	6.90084	-4.23578	0.00261744	0.0178391	-1.68677
AQP5	1.29075	5.54186	4.23405	0.00262378	0.0178663	-1.6893
CCNA2	1.22986	5.15081	4.23398	0.00262406	0.0178663	-1.68941
PNOC	2.93119	6.613	4.23259	0.00262916	0.0178864	-1.69144
SLC6A8	1.69527	6.45278	4.23109	0.00263468	0.0179029	-1.69363
UBE2Q2L	-1.13414	4.04487	-4.22953	0.00264044	0.0179301	-1.69591
PMS2P5	1.48515	7.28789	4.22638	0.00265211	0.0179775	-1.70052
TCIRG1	1.0452	7.80529	4.22553	0.00265526	0.0179889	-1.70176
CAMK1G	-1.67023	5.14588	-4.22397	0.00266106	0.0180104	-1.70404
PAIP2B	-1.20985	7.2581	-4.22092	0.00267243	0.0180575	-1.7085
PLAT	1.31477	8.0057	4.21995	0.00267607	0.0180672	-1.70992
RAP2C	-1.04228	6.85777	-4.21985	0.00267642	0.0180672	-1.71005
NDUFS6	1.20768	10.463	4.21717	0.00268648	0.0181093	-1.71397
CABLES1	1.24278	6.6574	4.21699	0.00268718	0.0181093	-1.71425
COPS2	-1.05952	8.01373	-4.21078	0.00271065	0.0182194	-1.72333
EHHADH	1.03724	5.29426	4.20736	0.00272367	0.0182829	-1.72834
NSUN5P1	1.07388	8.64295	4.20602	0.00272881	0.018305	-1.73031
USP47	-1.07592	7.49185	-4.20533	0.00273144	0.018305	-1.73131
PPP1R16B	1.05716	5.32017	4.19964	0.00275334	0.0183975	-1.73966
RAB8B	-1.08537	5.51869	-4.19838	0.00275821	0.0184241	-1.7415
ALDH6A1	-1.03089	6.87293	-4.19765	0.00276102	0.0184368	-1.74257
BCAM	1.77585	7.2725	4.19359	0.0027768	0.018506	-1.74852
ASL	1.11937	7.00564	4.18913	0.00279426	0.0186031	-1.75507
KIAA1462	-1.85035	5.89273	-4.18778	0.00279955	0.0186091	-1.75704
ZDHHC12	1.00222	6.83305	4.18631	0.00280535	0.0186416	-1.7592
AIM1	1.61713	6.71393	4.18533	0.0028092	0.0186602	-1.76064
TRIM23	-1.4586	4.80112	-4.17596	0.00284648	0.018855	-1.77441
KLF5	1.7273	7.01366	4.17567	0.00284761	0.018855	-1.77482
ANGPT1	-1.4933	4.77172	-4.17286	0.00285891	0.0189115	-1.77896
JAKMIP3	-1.12021	4.83166	-4.16976	0.00287141	0.0189819	-1.78351
APOC1	1.19218	7.87323	4.16594	0.00288688	0.0190716	-1.78913
LINC01140	-1.06961	5.5811	-4.16504	0.00289052	0.0190774	-1.79044
BBOX1	1.80657	4.82604	4.16	0.00291114	0.0191847	-1.79786
NUS1	1.05314	7.53359	4.15925	0.00291421	0.0191847	-1.79897
CHCHD10	1.25761	8.79119	4.15714	0.00292289	0.0192216	-1.80207
CEP170B	1.07648	7.36025	4.15535	0.00293028	0.0192467	-1.80471
LOC283588	-1.09152	4.5519	-4.14986	0.00295303	0.0193528	-1.81278
MEIS1	1.20396	8.77612	4.14906	0.00295638	0.0193601	-1.81397
FOXP2	-1.11768	4.15471	-4.14431	0.00297624	0.0194277	-1.82096
FZD7	-1.71176	8.34229	-4.14339	0.00298013	0.0194421	-1.82232
PFKP	1.22862	6.19103	4.14319	0.00298094	0.0194421	-1.82261
MFAP2	1.53107	7.94372	4.14234	0.00298453	0.0194532	-1.82386
KANSL1L	-1.34677	5.72116	-4.13973	0.00299556	0.019494	-1.82771
TMEM38A	1.25781	5.6227	4.13804	0.00300268	0.0195341	-1.83019
C7orf31	-1.44186	5.34036	-4.13297	0.00302429	0.0196622	-1.83768
MAP7	1.15994	6.07597	4.12858	0.00304309	0.0197343	-1.84415
IGIP	-1.33806	7.12141	-4.12758	0.0030474	0.019756	-1.84563
PITPNA-AS1	-1.20056	6.94429	-4.1263	0.00305294	0.0197793	-1.84752
HLA-F	1.00574	8.40758	4.1221	0.00307113	0.0198627	-1.85372
FAM161B	-1.14162	7.53004	-4.11603	0.0030976	0.0199502	-1.86268
SLC4A3	-1.19748	6.73595	-4.11516	0.0031014	0.0199606	-1.86396
CYS1	-2.21123	6.49629	-4.11209	0.00311491	0.0200098	-1.8685
TMA16	-1.05423	4.17613	-4.10933	0.00312712	0.0200325	-1.87258
TENM4	-1.05289	8.2378	-4.1093	0.00312725	0.0200325	-1.87263
TMEM246	-1.56207	7.00606	-4.10901	0.00312853	0.0200344	-1.87305
SLC6A16	-1.20055	5.43154	-4.10706	0.00313718	0.0200772	-1.87593
GANAB	1.82525	8.95231	4.10134	0.00316272	0.0202027	-1.8844
FERMT3	1.44935	6.33944	4.10074	0.0031654	0.0202072	-1.88528
DCDC2	1.83685	5.19	4.09642	0.00318483	0.0203059	-1.89167
GNL2	1.15339	7.63382	4.09454	0.00319336	0.0203349	-1.89446
EPHX1	-1.01088	9.73904	-4.08632	0.0032308	0.0205095	-1.90662
PHACTR3	-1.32052	4.98382	-4.08389	0.00324199	0.0205362	-1.91023
SULF2	-1.54042	8.34953	-4.08388	0.00324203	0.0205362	-1.91024
KYNU	1.38466	4.61056	4.08094	0.00325558	0.0206093	-1.91459
SPAG5	1.39118	6.3575	4.07965	0.00326154	0.0206406	-1.9165
DET1	-1.16225	6.82212	-4.07827	0.00326796	0.0206658	-1.91855
CALD1	-1.03216	7.33844	-4.07814	0.00326855	0.0206658	-1.91874
FXYD5	1.55785	7.6025	4.07419	0.00328694	0.0207441	-1.9246
KLHL4	-1.39728	4.31157	-4.07336	0.00329083	0.0207491	-1.92583
HIST1H1C	1.06561	7.36132	4.06162	0.00334626	0.0209628	-1.94325
LOC100505938	1.63377	5.08357	4.06127	0.00334793	0.0209668	-1.94378
CSTA	-1.79029	8.94972	-4.06085	0.00334991	0.0209704	-1.94439
PAQR4	1.0508	6.43877	4.05866	0.00336037	0.0209977	-1.94765
PAQR8	-1.35423	7.42174	-4.05405	0.0033825	0.0210826	-1.95449
GALNT12	1.85421	5.82811	4.04706	0.00341637	0.0212136	-1.96488
LOC441179	1.24693	4.23123	4.04515	0.00342564	0.0212532	-1.96771
FLJ22184	1.00381	5.54815	4.0439	0.00343177	0.0212615	-1.96957
DSC2	1.96535	5.72155	4.04148	0.00344362	0.0213101	-1.97317
BICC1	-1.48372	6.05747	-4.04076	0.00344716	0.0213143	-1.97424
SLC43A1	-1.01133	6.94829	-4.04002	0.00345083	0.0213241	-1.97535
CPNE1	1.01083	8.2106	4.03057	0.00349766	0.0215354	-1.98941
COL16A1	-1.41632	9.45612	-4.02855	0.00350777	0.0215911	-1.99242
CCR1	1.55519	5.48985	4.02514	0.00352487	0.0216651	-1.99749
PCED1B	-1.45719	6.48458	-4.02028	0.00354947	0.0217757	-2.00474
PCDH7	1.05734	4.72114	4.01959	0.00355292	0.0217904	-2.00575
VGLL1	1.12946	4.36043	4.0191	0.00355542	0.0217992	-2.00649
LGR6	2.88232	6.85408	4.00923	0.00360595	0.0220298	-2.0212
MEG3	-1.31382	5.9587	-4.00627	0.00362129	0.0220905	-2.02562
PLD1	-1.25584	4.92401	-4.0041	0.00363252	0.0221514	-2.02885
NPTX2	2.12597	5.5998	4.00158	0.00364564	0.0222132	-2.03261
CDK2AP2	1.47716	7.31661	4.0015	0.00364606	0.0222132	-2.03273
SLC24A3	-1.31054	7.04505	-4.00069	0.00365034	0.0222213	-2.03395
LOC100507642	1.54435	5.78877	4.00018	0.00365299	0.0222309	-2.03471
LDHA	1.6173	11.2151	3.99776	0.00366567	0.0222815	-2.03832
PTGER2	-1.74218	6.54982	-3.99567	0.00367663	0.0223283	-2.04143
LPAR4	-1.49443	5.38477	-3.99496	0.00368041	0.0223379	-2.0425
LOC100505915	-1.27971	6.93479	-3.99156	0.00369837	0.0224204	-2.04758
KIAA1377	-1.34057	5.91927	-3.98909	0.00371147	0.0224665	-2.05126
UBE2QL1	-2.11098	5.17807	-3.98381	0.00373967	0.0226037	-2.05915
CREBRF	-1.3481	7.20456	-3.98167	0.00375117	0.0226531	-2.06235
ARRDC2	1.14365	6.77292	3.97463	0.00378929	0.0228228	-2.07289
PEX12	-1.30904	6.67595	-3.97297	0.0037983	0.0228546	-2.07536
FOXJ1	1.41225	6.02121	3.96296	0.00385334	0.0230623	-2.09035
HIST1H2BK	1.37459	9.42871	3.96266	0.00385499	0.0230623	-2.0908
CTSK	-1.21904	8.48353	-3.96187	0.00385938	0.023081	-2.09199
AQP11	-1.28104	5.76019	-3.96091	0.00386471	0.0230867	-2.09342
C19orf33	3.63244	9.26812	3.9584	0.0038787	0.0231163	-2.09719
DSG2	1.94371	7.65531	3.95501	0.00389762	0.0232088	-2.10226
ASRGL1	3.22733	8.15859	3.95353	0.00390594	0.0232377	-2.10448
SFRP4	-2.19536	8.2387	-3.95327	0.00390738	0.0232377	-2.10486
MIB1	-1.34714	6.70357	-3.95316	0.00390801	0.0232377	-2.10503
EFNA1	1.99068	8.09178	3.95313	0.00390816	0.0232377	-2.10507
GNPDA2	-1.53191	6.05079	-3.95181	0.00391561	0.0232617	-2.10705
STARD9	-1.5074	5.79185	-3.95023	0.00392455	0.023294	-2.10943
RUNX1T1	-1.21233	4.84814	-3.94993	0.00392622	0.023294	-2.10987
PSMB3	1.02032	9.37068	3.94536	0.00395212	0.0233903	-2.11672
SNCAIP	-1.87557	5.90355	-3.94295	0.00396586	0.0234428	-2.12034
FBP1	1.29888	5.72705	3.94292	0.00396605	0.0234428	-2.12039
FAS	-1.34048	6.37348	-3.9428	0.00396671	0.0234428	-2.12056
CLDN6	1.6027	5.99117	3.93745	0.00399743	0.023563	-2.12859
UBQLNL	-1.27078	5.15435	-3.93711	0.0039994	0.0235679	-2.12911
TMC4	2.7587	7.40599	3.93534	0.00400961	0.0236106	-2.13176
SLC28A3	1.73496	5.04795	3.93523	0.00401022	0.0236106	-2.13192
OCIAD2	1.03773	8.69986	3.93366	0.00401928	0.0236339	-2.13427
GLIPR1	-1.26617	6.29524	-3.93295	0.0040234	0.0236345	-2.13534
SBK1	1.49501	5.79228	3.92898	0.00404654	0.023723	-2.14131
BTNL9	1.06481	6.18263	3.92863	0.00404857	0.023723	-2.14183
ZNF571	-1.51309	4.7452	-3.92397	0.00407586	0.0238331	-2.14883
SLC45A4	1.7753	6.92829	3.92103	0.00409321	0.0239209	-2.15325
MAMLD1	-1.12897	6.70409	-3.92053	0.00409617	0.0239314	-2.15401
GSTA1	-1.73517	6.21623	-3.92011	0.00409865	0.023939	-2.15464
POLE2	1.01488	5.07881	3.91695	0.00411738	0.02398	-2.15938
FADS3	1.34727	6.7457	3.91334	0.0041389	0.024089	-2.16481
PTGS1	2.97373	7.48358	3.90816	0.00416996	0.0241903	-2.17259
TUBB4B	1.10875	9.89713	3.90405	0.00419483	0.0242673	-2.17879
MCM3	1.35317	8.50665	3.90289	0.00420188	0.0242923	-2.18053
EML5	-1.09952	3.75802	-3.90075	0.00421487	0.0243468	-2.18375
NLRC5	1.20806	6.62718	3.89924	0.00422408	0.0243931	-2.18602
ANO9	1.52736	6.46434	3.89605	0.00424361	0.0244713	-2.19082
USP51	-1.38269	6.05907	-3.8938	0.00425749	0.0245375	-2.19422
LRP11	-1.2316	8.06717	-3.88877	0.00428857	0.0246699	-2.20179
FYN	-1.21803	7.22914	-3.88833	0.0042913	0.0246699	-2.20245
NR2F2-AS1	-3.04159	7.36026	-3.88796	0.00429359	0.0246699	-2.20301
FAM162B	-2.06575	6.01562	-3.88732	0.00429758	0.0246852	-2.20398
FLJ38379	-1.18279	3.87411	-3.88682	0.0043007	0.0246892	-2.20473
GFPT2	-2.00469	6.70183	-3.8837	0.00432016	0.024787	-2.20943
CCNA1	2.08076	5.28921	3.8797	0.00434527	0.0248822	-2.21546
LOC692247	1.13621	5.64757	3.8744	0.00437882	0.0250114	-2.22347
SEMA6A	-1.12451	5.42535	-3.87373	0.00438309	0.0250194	-2.22448
KAT6B	-1.08011	6.57811	-3.87248	0.00439099	0.0250459	-2.22635
NEDD4	-1.12122	5.24737	-3.86756	0.00442245	0.0251762	-2.23378
MLLT4-AS1	1.18995	5.73368	3.86729	0.00442416	0.0251789	-2.23418
OXTR	2.03215	6.24055	3.86524	0.00443738	0.0252092	-2.23729
CTCFL	3.41857	5.65907	3.86079	0.00446613	0.025321	-2.24401
C14orf28	-1.24822	5.82275	-3.85798	0.00448439	0.0253942	-2.24825
TNFAIP8L3	-2.43615	6.01075	-3.85619	0.00449603	0.0254194	-2.25095
CSRNP3	-1.00361	5.14053	-3.85615	0.00449628	0.0254194	-2.25101
PRDM1	-1.00388	6.00428	-3.85328	0.0045151	0.0254721	-2.25535
CHAF1B	1.16212	5.7326	3.85149	0.00452688	0.0254798	-2.25806
DZIP3	-1.01534	6.7768	-3.85019	0.0045354	0.0254999	-2.26002
HIST1H2BH	1.0802	5.5397	3.84844	0.00454696	0.0255369	-2.26267
PRRT2	-1.59924	7.18606	-3.84442	0.00457364	0.0255959	-2.26875
TRIM59	1.60976	4.75374	3.84355	0.0045794	0.0256206	-2.27006
MAGEA11	1.71846	3.88646	3.83219	0.00465571	0.0259482	-2.28725
CMAHP	-1.03777	4.75676	-3.82987	0.00467148	0.0260077	-2.29076
MASTL	1.3864	5.35186	3.822	0.00472533	0.026229	-2.30268
RIPK4	1.24343	5.66635	3.82122	0.00473071	0.02625	-2.30387
MOCOS	-1.0752	6.15666	-3.82108	0.00473167	0.02625	-2.30408
LOC102724362	1.38353	5.80163	3.81914	0.00474506	0.0262887	-2.30702
MCM10	1.12498	3.94337	3.81865	0.00474846	0.0262932	-2.30776
KRT5	1.00459	5.03876	3.81765	0.00475539	0.0263103	-2.30928
LRRC2	-1.77547	5.05434	-3.8157	0.00476893	0.0263488	-2.31223
KIAA1958	-1.01166	6.54322	-3.81558	0.00476974	0.0263488	-2.31241
FANCI	1.11201	5.34715	3.81365	0.00478317	0.0263997	-2.31533
KRT19	1.30582	7.08799	3.81175	0.0047965	0.0264523	-2.31822
FCGR2B	2.24574	4.85415	3.81173	0.00479658	0.0264523	-2.31824
TXLNB	-2.03701	4.51434	-3.80761	0.00482551	0.0265689	-2.32449
TMEM44	1.30932	5.99098	3.80553	0.00484021	0.0266283	-2.32766
PPAP2B	-1.08005	9.09747	-3.80104	0.00487204	0.0267607	-2.33447
TMEM30B	1.22578	5.44232	3.79283	0.00493077	0.0269958	-2.34692
ITGB2	1.3874	5.97473	3.78752	0.00496921	0.027141	-2.35499
NEFH	-1.75636	7.83995	-3.7872	0.00497151	0.0271456	-2.35547
TAP1	1.70542	7.99246	3.78701	0.00497295	0.0271456	-2.35577
MIF	1.37535	11.189	3.78548	0.00498406	0.0271815	-2.35809
PRKAG1	1.06211	7.86011	3.78504	0.00498726	0.0271815	-2.35876
FUT8	1.13055	5.82093	3.7843	0.00499268	0.0272	-2.35989
FAM19A5	-1.02	5.42766	-3.78139	0.00501395	0.0272833	-2.36431
CLDN16	1.2345	5.36445	3.78101	0.00501673	0.0272912	-2.36488
P2RX7	-1.01122	5.53714	-3.77976	0.00502592	0.0273252	-2.36678
SGK1	-1.62783	10.3477	-3.77949	0.00502791	0.0273252	-2.3672
GPR56	1.66857	6.72594	3.77943	0.00502832	0.0273252	-2.36728
SAPCD2	1.0057	6.61435	3.77697	0.00504651	0.0273937	-2.37103
TUBBP5	1.32656	4.57769	3.77682	0.00504762	0.0273937	-2.37126
C5orf34	1.04609	5.09215	3.76594	0.00512865	0.0276766	-2.38781
COL13A1	1.42585	6.02062	3.76526	0.00513373	0.0276825	-2.38883
PLEK	1.01743	5.94637	3.76219	0.00515689	0.0277585	-2.39351
MTFP1	1.96058	6.54186	3.76195	0.00515872	0.0277599	-2.39388
LOC101928963	-1.37946	4.18787	-3.7618	0.00515986	0.0277599	-2.39411
POLI	-1.26694	5.68842	-3.758	0.00518864	0.0278853	-2.39988
ELMO3	1.73915	6.38229	3.75724	0.00519447	0.0278947	-2.40105
SEMA3C	-1.65224	6.98719	-3.75564	0.00520669	0.0279339	-2.40349
RYR1	1.7972	5.05781	3.74647	0.00527713	0.0281661	-2.41745
GLDC	2.25027	7.26298	3.74551	0.00528464	0.0281661	-2.41892
DNM3OS	-1.13771	6.57853	-3.74199	0.00531199	0.0282735	-2.42428
FNDC4	-1.06982	7.27184	-3.74145	0.0053162	0.0282886	-2.42511
BGN	1.39638	6.98788	3.73969	0.00532994	0.0283395	-2.42779
C1QC	1.94319	7.47754	3.73634	0.00535627	0.0284426	-2.4329
ZNF23	-1.08097	6.18183	-3.73522	0.00536507	0.0284819	-2.43461
SMKR1	1.44163	4.33803	3.72806	0.00542178	0.0286862	-2.44553
UQCRFS1	1.04895	10.46	3.72138	0.00547534	0.0288984	-2.45573
OGN	-2.65209	7.61532	-3.7124	0.00554817	0.0291814	-2.46945
FZD2	1.09754	6.69673	3.71026	0.0055657	0.0292361	-2.47272
VWDE	1.03102	3.75956	3.71008	0.00556714	0.0292361	-2.47299
EPHX3	1.31728	4.76872	3.7098	0.00556945	0.0292407	-2.47342
PSORS1C3	1.43647	4.12737	3.70765	0.00558715	0.029281	-2.47671
DDX11	1.35411	6.56518	3.70486	0.00561014	0.0293864	-2.48097
KIAA1586	-1.28758	4.71392	-3.7003	0.00564793	0.0295269	-2.48794
PNPLA8	-1.08825	7.73919	-3.70023	0.00564851	0.0295269	-2.48804
PLA2G1B	-2.38058	4.69235	-3.69715	0.0056742	0.0296007	-2.49275
BEX1	-2.70451	8.16869	-3.6929	0.00570995	0.0296772	-2.49927
ASTN1	-1.95734	5.03093	-3.68794	0.00575183	0.0298383	-2.50685
DACT1	-1.97771	6.63834	-3.68344	0.00579017	0.0299953	-2.51374
CD97	1.35794	7.16781	3.68311	0.00579296	0.0299985	-2.51424
FADD	1.12368	7.53884	3.67219	0.00588716	0.030348	-2.53097
TSTD1	1.0678	8.7816	3.67023	0.00590429	0.0303828	-2.53399
PRTFDC1	-1.39069	7.37081	-3.66944	0.00591113	0.0304026	-2.53519
OGDHL	1.38171	6.2993	3.65488	0.00603986	0.0308861	-2.55752
LY75	2.469	6.00836	3.65225	0.00606342	0.0309679	-2.56156
SFXN1	-1.01992	6.18569	-3.64915	0.00609129	0.0310648	-2.56631
TSPYL4	-1.05019	8.62786	-3.64913	0.0060915	0.0310648	-2.56635
MPPED2	1.93304	5.25591	3.64728	0.00610814	0.0311264	-2.56918
ZNRF3	-1.01385	7.9391	-3.64319	0.00614528	0.0312456	-2.57546
C9orf142	1.09795	6.90969	3.64025	0.00617211	0.0313198	-2.57998
RIOK2	-1.00456	6.25378	-3.6393	0.00618085	0.0313335	-2.58144
CPEB1	-1.07365	4.97242	-3.63927	0.00618113	0.0313335	-2.58149
ABHD12	1.10007	7.44798	3.63779	0.00619468	0.0313798	-2.58376
KCNS3	1.55593	4.65179	3.63358	0.00623341	0.0315188	-2.59022
KRT18	3.11113	10.795	3.63327	0.00623633	0.0315206	-2.5907
SCGB2A1	4.59892	7.947	3.6324	0.00624436	0.0315534	-2.59204
MUC5B	1.12504	5.12127	3.6319	0.00624902	0.0315613	-2.59281
TNFSF13	1.04803	7.71206	3.62943	0.0062719	0.0316301	-2.5966
EFEMP1	-1.53685	7.01869	-3.62809	0.00628439	0.0316647	-2.59866
KLK10	1.53417	6.21782	3.62803	0.00628497	0.0316647	-2.59876
HK1	1.16855	8.76225	3.62306	0.00633149	0.0318051	-2.6064
GSTM4	-1.24111	6.09522	-3.61051	0.00645064	0.0321981	-2.62571
CTHRC1	2.43113	8.73251	3.60623	0.00649179	0.0323089	-2.6323
KCNMB3	1.34547	5.35035	3.60546	0.0064992	0.0323379	-2.63348
ERN1	-1.13325	5.58888	-3.60154	0.00653718	0.0325111	-2.63951
LRRN3	-2.08211	5.7518	-3.60064	0.00654592	0.0325467	-2.6409
VSIG4	2.2759	6.72131	3.59998	0.00655237	0.0325629	-2.64192
ICAM3	1.25521	6.9241	3.59723	0.00657923	0.0326567	-2.64615
IGSF9	1.95992	6.3703	3.5954	0.00659718	0.032701	-2.64898
TSPAN15	1.61699	5.95023	3.59352	0.0066157	0.0327504	-2.65188
ARHGAP25	-1.0114	5.82013	-3.59292	0.00662153	0.0327634	-2.65279
PLS3	-1.20664	10.0493	-3.59254	0.00662535	0.0327743	-2.65339
CHD1	-1.48773	7.83051	-3.59202	0.00663046	0.0327838	-2.65419
SLC16A2	-1.16448	5.8899	-3.57913	0.00675896	0.0331673	-2.67406
USP37	-1.02985	5.8098	-3.57318	0.00681914	0.0333221	-2.68323
CTSV	1.67991	6.74867	3.57	0.00685156	0.0334326	-2.68814
CD163	1.90022	6.03459	3.56798	0.00687221	0.0335174	-2.69126
RPRM	-1.06796	7.02295	-3.56779	0.00687418	0.033519	-2.69155
SORL1	1.14453	8.85869	3.56413	0.00691183	0.0336444	-2.69721
FAM178A	-1.03845	6.59641	-3.56404	0.0069127	0.0336444	-2.69734
AR	-1.29991	7.21914	-3.56245	0.00692918	0.0336903	-2.6998
ERV3-2	1.43964	6.06418	3.55317	0.00702582	0.0340394	-2.71413
PABPC5	-1.20859	3.45821	-3.5513	0.00704548	0.0340908	-2.71702
COPG2IT1	1.15901	6.04801	3.54945	0.00706494	0.0341577	-2.71988
HLA-DPA1	1.59648	8.70652	3.54486	0.00711358	0.0343183	-2.72698
MLPH	1.59268	8.25464	3.54211	0.00714287	0.0344271	-2.73123
SEMA4B	1.1572	7.68316	3.53608	0.0072076	0.0346005	-2.74056
SARS2	1.09127	6.19135	3.53289	0.00724202	0.0347169	-2.74548
APOD	-2.11758	7.13321	-3.53199	0.00725179	0.0347231	-2.74688
SCARA3	2.15769	6.72682	3.52934	0.00728061	0.0348447	-2.75098
STGC3	-1.26323	5.25918	-3.51779	0.00740758	0.0352839	-2.76886
DDIT4	-1.29811	9.98079	-3.51772	0.00740843	0.0352839	-2.76897
GLIS3	-1.41888	6.4666	-3.51559	0.00743211	0.0353384	-2.77227
THBD	-1.19785	5.22719	-3.51476	0.00744138	0.0353496	-2.77356
HLA-DQB1	1.25463	6.4264	3.50794	0.00751775	0.0355719	-2.78412
C7	-1.29081	8.50703	-3.50742	0.00752366	0.0355917	-2.78493
PAEP	2.58908	5.21475	3.50554	0.00754485	0.0356672	-2.78784
CABLES2	1.10187	7.31282	3.5042	0.00756011	0.0357228	-2.78992
LCP1	1.22014	6.47189	3.50195	0.00758558	0.0358083	-2.7934
TNFAIP2	1.91637	7.03019	3.50168	0.00758869	0.0358083	-2.79382
FIGN	-1.32312	6.11886	-3.50025	0.00760497	0.0358603	-2.79604
HTRA3	-1.05972	6.50628	-3.49823	0.00762809	0.035932	-2.79918
ZNF204P	-1.37811	6.42672	-3.49761	0.00763519	0.035953	-2.80014
IMPA2	1.22787	6.62285	3.497	0.00764218	0.0359657	-2.80108
FPGT	-1.02283	6.53568	-3.49546	0.00765988	0.0360362	-2.80347
GTSF1	1.75426	4.78354	3.494	0.00767667	0.0360902	-2.80573
DENND2D	1.04749	5.93131	3.48837	0.00774176	0.0362962	-2.81446
DKK2	-1.32528	3.79725	-3.4845	0.007787	0.0364248	-2.82048
SQRDL	1.40691	8.4866	3.48354	0.00779823	0.036444	-2.82197
VMP1	1.64272	7.0343	3.48017	0.0078378	0.0365454	-2.82719
PGAP1	-1.2912	5.25426	-3.47946	0.00784618	0.0365623	-2.8283
KCTD9	-1.22482	6.2836	-3.4742	0.00790846	0.0367982	-2.83647
SH3GL2	-1.40354	3.6519	-3.47109	0.00794545	0.0369128	-2.84128
SOX9	3.32777	6.86809	3.46792	0.00798347	0.0370054	-2.84621
CLIC5	1.35766	5.83615	3.46713	0.00799293	0.0370325	-2.84744
SALL1	-1.85712	4.00644	-3.46093	0.00806788	0.0372364	-2.85707
PLSCR4	-1.27918	8.58025	-3.45977	0.00808202	0.0372764	-2.85888
CTH	-1.90738	5.13732	-3.45696	0.00811625	0.0373753	-2.86325
AVPI1	-1.95347	7.70802	-3.45613	0.00812642	0.0374053	-2.86454
TRIM22	-1.01904	8.391	-3.4554	0.00813537	0.0374381	-2.86567
MYCL	2.07404	5.588	3.45481	0.00814258	0.0374628	-2.86659
PRIMA1	1.42136	7.32153	3.44962	0.00820648	0.0376552	-2.87466
ING2	-1.44732	5.98691	-3.4435	0.00828257	0.0379023	-2.88418
FOXP4	1.06077	6.07593	3.44297	0.00828917	0.0379156	-2.88501
TMEM35	-2.04736	5.2456	-3.44227	0.00829785	0.037929	-2.88609
KB-431C1.4	1.03164	4.8203	3.44118	0.00831155	0.0379755	-2.88779
ZNF239	1.0979	6.93251	3.43604	0.00837616	0.0381751	-2.89578
PCDH18	-1.31572	6.12149	-3.43373	0.00840547	0.0382509	-2.89938
PLEKHF1	1.12712	6.928	3.43309	0.00841349	0.0382789	-2.90037
GREB1	-1.44103	5.72642	-3.43188	0.0084289	0.0383234	-2.90226
FAM210B	-1.17228	9.38297	-3.42817	0.0084763	0.0384449	-2.90804
SHPRH	-1.44907	6.84515	-3.42607	0.00850313	0.0385324	-2.9113
MAVS	1.11221	7.46835	3.42257	0.00854823	0.0386968	-2.91676
ENDOG	1.17446	6.62423	3.42252	0.00854886	0.0386968	-2.91683
DEPDC1	1.10811	4.05473	3.41936	0.00858969	0.0388559	-2.92175
SMIM3	-1.49494	7.02066	-3.41492	0.00864758	0.0390491	-2.92868
CIB1	1.00908	8.4438	3.41404	0.008659	0.0390555	-2.93004
OR7E14P	1.04046	4.00127	3.4069	0.00875299	0.0394289	-2.94117
PRKCQ	1.15176	5.86955	3.40115	0.00882944	0.0397208	-2.95014
HOOK1	1.80179	5.70139	3.39937	0.0088532	0.0397903	-2.95291
SLC12A7	1.33497	8.05819	3.39896	0.00885881	0.0397917	-2.95356
SYT4	-1.19848	4.8539	-3.39688	0.00888673	0.0398768	-2.9568
MARVELD2	1.68588	5.58214	3.39667	0.00888945	0.0398768	-2.95712
ZNF331	-2.50202	8.04899	-3.39084	0.00896822	0.0400633	-2.96621
MALAT1	-1.04994	8.51817	-3.38747	0.00901413	0.0401894	-2.97148
F2RL1	1.44233	5.48566	3.38687	0.00902233	0.0402084	-2.97241
TRHDE	-1.45549	3.80333	-3.38588	0.00903588	0.0402513	-2.97396
CASP12	-1.00108	3.90948	-3.38356	0.00906771	0.0403454	-2.97758
WDR34	1.44659	7.80072	3.38199	0.00908922	0.0404097	-2.98002
EGFLAM	-1.14838	7.17796	-3.38	0.00911672	0.0405056	-2.98314
ECHDC2	-1.00039	9.47791	-3.37897	0.00913091	0.0405422	-2.98474
FAM3B	2.13741	6.03493	3.37861	0.00913591	0.0405556	-2.9853
ERRFI1	-1.67143	8.97593	-3.37517	0.00918364	0.0407233	-2.99067
ST6GALNAC2	2.26581	6.4098	3.36605	0.00931161	0.041103	-3.00493
PPL	1.61705	8.68749	3.36435	0.0093357	0.0411697	-3.00759
MSLN	3.68198	8.72918	3.36428	0.00933663	0.0411697	-3.00769
LOC100996740	1.31028	9.24738	3.36174	0.00937271	0.0412843	-3.01167
LOC100507073	-1.72266	6.53	-3.36145	0.00937681	0.0412935	-3.01212
DOK5	1.7333	6.97421	3.35542	0.00946298	0.0415743	-3.02154
SRD5A3	1.96247	4.94596	3.35514	0.00946698	0.0415743	-3.02197
TRIT1	1.02652	7.78694	3.35177	0.00951563	0.0417396	-3.02725
SPIN1	-1.04377	8.57295	-3.33058	0.00982707	0.0428065	-3.0604
[truncated: 59 more rows]

## Sheet: GSE54388-DEG
Genesymbol	logFC	AveExpr	t	P.Value	adj.P.Val	B
ARX	-2.63101	5.22534	-19.8779	9.0245e-16	1.08045e-11	25.4481
LINC01105	-4.22094	4.72173	-19.7319	1.05616e-15	1.08045e-11	25.3114
WNT2B	-3.74392	5.89874	-19.2554	1.77776e-15	1.21243e-11	24.8567
ITLN1	-8.29186	6.37197	-17.7334	1.01648e-14	5.19931e-11	23.3107
GPRASP1	-3.94449	6.25511	-17.4601	1.40953e-14	5.76779e-11	23.017
ABCA8	-2.56441	4.62667	-16.8506	2.9698e-14	1.0127e-10	22.3435
MGARP	-4.91192	6.67523	-16.2117	6.65268e-14	1.94448e-10	21.6082
CALB2	-3.95438	7.43954	-15.8262	1.09674e-13	2.80491e-10	21.1494
TCF21	-2.79322	6.26493	-15.6926	1.30728e-13	2.83112e-10	20.9877
PEX5L	-2.20441	4.43391	-15.6495	1.38374e-13	2.83112e-10	20.9353
DIRAS3	-4.72781	6.65823	-15.2677	2.30448e-13	4.28633e-10	20.4637
ADH1C	-3.01316	5.18981	-14.8111	4.30175e-13	7.33448e-10	19.8837
CHGB	-3.91059	5.30711	-14.2816	9.05056e-13	1.41414e-09	19.1882
LHX2	-2.93106	4.82031	-14.2348	9.67642e-13	1.41414e-09	19.1255
NDNF	-2.91078	6.39033	-13.9947	1.36709e-12	1.86472e-09	18.8008
PDE8B	-3.02691	4.7583	-13.8401	1.71233e-12	2.18964e-09	18.5887
RYR2	-1.8119	4.68894	-13.6665	2.20999e-12	2.65978e-09	18.348
HAND2-AS1	-3.45177	4.63121	-13.4913	2.86658e-12	3.25835e-09	18.102
BCO2	-2.84354	6.04871	-13.2139	4.35123e-12	4.68559e-09	17.7065
TCEAL7	-3.8721	4.85853	-13.0856	5.28982e-12	5.3451e-09	17.5209
PRG4	-5.13026	4.88928	-13.0618	5.48617e-12	5.3451e-09	17.4863
NUF2	4.43563	7.32709	12.7366	9.06873e-12	8.43392e-09	17.0076
NPY1R	-5.25966	5.28868	-12.5814	1.15687e-11	9.56296e-09	16.7751
NEK2	2.21245	6.09001	12.5813	1.15689e-11	9.56296e-09	16.7751
LHX9	-1.69233	4.24014	-12.575	1.16849e-11	9.56296e-09	16.7656
SLC4A4	-1.36148	5.03254	-12.4634	1.39399e-11	1.05694e-08	16.5968
GABRG1	-1.61599	3.68325	-12.4631	1.39479e-11	1.05694e-08	16.5963
AOX1	-3.84155	6.86748	-12.414	1.50799e-11	1.10191e-08	16.5216
CCDC68	-2.792	6.07411	-12.2504	1.95882e-11	1.3812e-08	16.271
REEP1	-4.24183	6.73609	-12.2284	2.0295e-11	1.3812e-08	16.237
KLF2	-1.58687	7.02344	-12.2094	2.09273e-11	1.3812e-08	16.2076
CD24	5.3932	9.78438	12.0878	2.5475e-11	1.62881e-08	16.0189
CRABP2	3.7579	9.27136	11.9965	2.95561e-11	1.83248e-08	15.8761
MCM2	2.94866	9.46302	11.9372	3.25683e-11	1.95985e-08	15.7828
LRRN4	-3.17156	6.08315	-11.8889	3.52565e-11	2.05474e-08	15.7066
LOC100996760	-5.22146	5.3714	-11.8736	3.61538e-11	2.05474e-08	15.6824
STIL	2.39521	8.16276	11.8316	3.87415e-11	2.1423e-08	15.6158
CLDN15	-2.85674	7.95396	-11.6621	5.13244e-11	2.76341e-08	15.3449
ZWINT	3.11121	9.8082	11.6278	5.43407e-11	2.8508e-08	15.2898
MMP28	-1.24243	5.85053	-11.4975	6.76264e-11	3.45909e-08	15.0787
MCM4	1.41154	6.40969	11.4623	7.17604e-11	3.58102e-08	15.0214
TVP23A	-2.25625	4.28287	-11.4166	7.75257e-11	3.77661e-08	14.9468
SPRR2B	-1.68154	6.64701	-11.294	9.54875e-11	4.49043e-08	14.7453
CEP55	4.16506	8.22451	11.2874	9.65683e-11	4.49043e-08	14.7344
GADL1	-3.77973	4.45455	-11.244	1.04001e-10	4.7286e-08	14.6626
PDE7B	-1.3921	5.39049	-11.2015	1.11861e-10	4.97537e-08	14.5921
CACNB2	-1.00845	4.19713	-11.1714	1.178e-10	5.06555e-08	14.542
PCDP1	-1.34714	5.29976	-11.1663	1.1884e-10	5.06555e-08	14.5335
IFFO1	-1.84911	7.53944	-11.1322	1.26025e-10	5.26217e-08	14.4766
C21orf62	-2.70684	6.49162	-11.1175	1.29243e-10	5.28862e-08	14.4522
TCEAL2	-5.51663	6.47705	-10.9076	1.86122e-10	7.46676e-08	14.0985
HLF	-2.31072	4.99798	-10.8643	2.0077e-10	7.89951e-08	14.025
GPM6A	-3.04767	5.33155	-10.6963	2.69959e-10	1.03645e-07	13.7373
CXorf57	-1.43622	4.14935	-10.6788	2.78471e-10	1.03645e-07	13.7071
PTGIS	-2.13868	5.91092	-10.6778	2.78981e-10	1.03645e-07	13.7053
CHMP4C	4.04915	8.67305	10.6684	2.83682e-10	1.03645e-07	13.689
TSPAN5	-2.40493	6.73521	-10.6176	3.10511e-10	1.11457e-07	13.6011
SYT4	-3.63266	5.24028	-10.5983	3.21368e-10	1.13365e-07	13.5677
PRSS35	-4.68952	4.56976	-10.5768	3.33944e-10	1.15361e-07	13.5303
SNCA	-1.84437	6.11656	-10.5695	3.38303e-10	1.15361e-07	13.5177
CNRIP1	-2.91694	7.65187	-10.5212	3.68871e-10	1.23723e-07	13.4335
OGN	-4.96871	4.89628	-10.47	4.04373e-10	1.33443e-07	13.344
LRRC8D	1.74756	10.2052	10.3849	4.71479e-10	1.51231e-07	13.1944
PPM1K	-1.76836	5.67475	-10.383	4.73058e-10	1.51231e-07	13.1911
RUNX1T1	-1.51043	5.29274	-10.3681	4.86057e-10	1.52605e-07	13.1647
FAM83D	3.24892	7.9135	10.3611	4.92273e-10	1.52605e-07	13.1523
KIF11	3.42416	7.7646	10.1399	7.36895e-10	2.24319e-07	12.7587
PABPC5	-1.68245	3.25836	-10.1336	7.45536e-10	2.24319e-07	12.7473
BUB1B	3.59603	8.37171	10.0643	8.47009e-10	2.51156e-07	12.6226
PANK1	2.4839	8.10088	10.0343	8.95319e-10	2.58439e-07	12.5684
CLEC4M	-4.36285	6.30658	-10.0334	8.9683e-10	2.58439e-07	12.5668
DLGAP5	3.65672	7.48323	9.97385	1.00144e-09	2.84577e-07	12.4589
DAPK1-IT1 /// DAPK1-IT1	-2.41585	5.26955	-9.94268	1.06119e-09	2.97424e-07	12.4022
MELK	3.42879	8.57673	9.90481	1.13875e-09	3.1485e-07	12.3332
HSD17B2	-3.23014	5.33009	-9.88544	1.18071e-09	3.21659e-07	12.2978
TRIP13	3.79907	8.47342	9.87907	1.19482e-09	3.21659e-07	12.2862
C1orf106	3.22558	8.11524	9.85831	1.24213e-09	3.30053e-07	12.2482
GFPT2	-2.8337	6.92344	-9.77503	1.45222e-09	3.80928e-07	12.0953
CENPU	1.83511	6.14876	9.66979	1.7714e-09	4.5877e-07	11.9006
MUM1L1	-5.56443	6.5195	-9.6364	1.8872e-09	4.74148e-07	11.8386
SEL1L2	-3.01947	5.3187	-9.63276	1.9003e-09	4.74148e-07	11.8318
SHISA3	-4.13487	4.4369	-9.61903	1.95049e-09	4.80808e-07	11.8062
AURKA	2.02941	7.23853	9.58282	2.08964e-09	5.08977e-07	11.7387
CXXC5	3.24664	10.1941	9.56648	2.15574e-09	5.189e-07	11.7082
EPCAM	3.91777	12.0648	9.52039	2.35413e-09	5.60065e-07	11.6218
CCND2	-1.60326	6.10822	-9.51033	2.39991e-09	5.64393e-07	11.6029
FOXM1	2.4783	7.23403	9.48107	2.5383e-09	5.85446e-07	11.5479
NUSAP1	2.4076	8.41839	9.47935	2.54666e-09	5.85446e-07	11.5447
DFNA5	-3.76713	8.11487	-9.41038	2.90773e-09	6.56709e-07	11.4146
PARM1	-1.69105	6.06706	-9.40689	2.92737e-09	6.56709e-07	11.408
TMEM37	-1.18617	6.68426	-9.40237	2.95294e-09	6.56709e-07	11.3994
CPED1	-1.7606	6.15675	-9.37493	3.11355e-09	6.77198e-07	11.3474
C1orf168	-2.89764	6.06191	-9.37245	3.12849e-09	6.77198e-07	11.3427
MECOM	2.52751	6.04233	9.36913	3.14862e-09	6.77198e-07	11.3364
SPOCK1	-4.20017	7.22723	-9.34792	3.28037e-09	6.86422e-07	11.2962
GALNT9	-1.2778	5.8057	-9.34675	3.28785e-09	6.86422e-07	11.294
NUMB	-1.74618	4.61346	-9.32991	3.39677e-09	7.02e-07	11.2619
PSAT1	3.32665	8.20792	9.31319	3.50863e-09	7.17865e-07	11.2301
KDR	-4.04457	8.01942	-9.29649	3.62416e-09	7.27809e-07	11.1983
WFDC2	1.6367	7.06506	9.29589	3.62837e-09	7.27809e-07	11.1972
TMEM139	2.89891	7.68928	9.27189	3.80159e-09	7.55151e-07	11.1513
SFRP1	-2.99527	5.86195	-9.2489	3.9755e-09	7.79678e-07	11.1074
AK311120 /// LSAMP	-1.24757	5.52107	-9.24558	4.00128e-09	7.79678e-07	11.101
BDKRB1	-1.3074	5.2105	-9.23115	4.11539e-09	7.94348e-07	11.0734
ARHGAP6	-1.59511	5.20394	-9.19747	4.39499e-09	8.40388e-07	11.0088
SMPD3	-1.65432	5.39053	-9.15929	4.73579e-09	8.89481e-07	10.9354
MGC24103	-3.78278	6.56348	-9.15897	4.73868e-09	8.89481e-07	10.9348
SMTNL2	-1.58851	6.29597	-9.11751	5.14016e-09	9.56071e-07	10.8548
PTGDR	-1.23744	4.0072	-9.10881	5.22874e-09	9.63784e-07	10.838
CCNB1	3.26777	8.72344	9.07366	5.60308e-09	1.02356e-06	10.77
MNDA	-4.60811	7.10425	-9.04544	5.92366e-09	1.07255e-06	10.7153
ELF3	2.75324	7.70895	9.0316	6.08774e-09	1.09259e-06	10.6884
CENPK	3.54571	7.03206	9.0244	6.17495e-09	1.09392e-06	10.6744
PAPSS2	-2.33893	6.84934	-9.02218	6.20206e-09	1.09392e-06	10.6701
CORO2B	-1.52417	5.6887	-9.0111	6.33941e-09	1.10858e-06	10.6486
CKS2	3.2541	9.98274	8.99306	6.56977e-09	1.13913e-06	10.6134
DOK6	-1.06374	3.96622	-8.98397	6.68916e-09	1.14438e-06	10.5957
CELF2	-1.91271	6.14736	-8.98226	6.71189e-09	1.14438e-06	10.5924
RAD51AP1	3.67436	8.77573	8.93738	7.33697e-09	1.22584e-06	10.5047
LGALS2	-2.96023	5.65116	-8.93194	7.41676e-09	1.22584e-06	10.4941
PRDM5	-1.06654	4.48248	-8.93175	7.41956e-09	1.22584e-06	10.4937
HOMER2	2.10206	6.75133	8.93109	7.42932e-09	1.22584e-06	10.4924
PTPRH	-1.221	5.74471	-8.92324	7.54617e-09	1.23172e-06	10.477
ADH1B	-3.19416	4.73377	-8.92063	7.58538e-09	1.23172e-06	10.4719
DAPK1	-1.55445	7.01766	-8.90668	7.79902e-09	1.25644e-06	10.4446
ECT2	1.55564	6.02214	8.89648	7.95913e-09	1.27222e-06	10.4246
THBD	-2.43261	5.55057	-8.88945	8.07142e-09	1.28016e-06	10.4108
KIF14	2.48616	6.46452	8.85648	8.62022e-09	1.35669e-06	10.346
TOP2A	2.6542	6.66422	8.77299	1.01893e-08	1.5914e-06	10.1813
IGFBP6	-3.23685	7.79772	-8.74636	1.07498e-08	1.66622e-06	10.1285
TTK	3.59931	7.5337	8.73316	1.10391e-08	1.6982e-06	10.1023
HBB	-4.05969	7.77024	-8.70172	1.17615e-08	1.78252e-06	10.0399
BAMBI	-2.79733	6.72999	-8.66375	1.26991e-08	1.88587e-06	9.96424
CDCA8	1.93746	8.35107	8.65987	1.27991e-08	1.88587e-06	9.95651
PRO2852	-1.83961	5.57379	-8.65834	1.28388e-08	1.88587e-06	9.95346
DNA2	2.10927	6.7872	8.65553	1.29122e-08	1.88587e-06	9.94784
LOC100506834	-2.23702	5.26707	-8.65328	1.29711e-08	1.88587e-06	9.94335
NKX3-1	-1.24887	7.36565	-8.65231	1.29965e-08	1.88587e-06	9.94143
SCN3B	-1.60785	5.50444	-8.63781	1.33837e-08	1.92839e-06	9.91247
AADACL2	-3.54943	4.23764	-8.62956	1.36094e-08	1.93318e-06	9.89598
KIF20A	2.94269	7.65256	8.62628	1.37004e-08	1.93318e-06	9.88941
SRPK1	1.09613	8.38861	8.6151	1.40147e-08	1.96397e-06	9.86705
ARHGAP18	-3.31193	7.22239	-8.57834	1.51013e-08	2.10185e-06	9.7934
SOX9	2.76633	6.46534	8.5724	1.5285e-08	2.11304e-06	9.78148
FEN1	1.78414	8.63217	8.56307	1.55779e-08	2.13909e-06	9.76275
DSCAML1	-1.01307	4.90223	-8.54113	1.62901e-08	2.22197e-06	9.71865
E2F8	2.6928	7.85708	8.52807	1.67298e-08	2.26684e-06	9.69237
HSPB3	-1.22968	5.48296	-8.5214	1.6959e-08	2.28277e-06	9.67895
RNF128	-3.94765	5.37672	-8.50538	1.75233e-08	2.34332e-06	9.64665
LOC646762	-1.53315	6.33826	-8.49577	1.78709e-08	2.37428e-06	9.62727
UHRF1	2.60946	7.09849	8.47715	1.85649e-08	2.45057e-06	9.58968
PHLPP2	-1.23305	6.667	-8.4687	1.8889e-08	2.47737e-06	9.5726
PEG3-AS1	-3.09376	5.85619	-8.45337	1.94917e-08	2.54013e-06	9.5416
CENPL	1.33117	6.4766	8.43456	2.02588e-08	2.60826e-06	9.5035
CARNS1	-1.60509	6.68403	-8.4343	2.02695e-08	2.60826e-06	9.50298
KLHL14	2.06342	6.37049	8.42769	2.05465e-08	2.62739e-06	9.48958
PROCR	-3.79099	6.20987	-8.41275	2.11872e-08	2.69249e-06	9.45927
KIF4A	2.72952	6.8951	8.39518	2.19668e-08	2.7634e-06	9.4236
BNC1	-3.87091	6.31868	-8.39394	2.20232e-08	2.7634e-06	9.42106
ARF1	-1.00477	6.77279	-8.39114	2.21504e-08	2.7634e-06	9.41538
KIAA0101	1.82515	8.5193	8.36907	2.31807e-08	2.8744e-06	9.37049
HMGB3	1.7606	8.22754	8.35652	2.37886e-08	2.93202e-06	9.34493
STK31	-3.61652	7.35242	-8.34291	2.44663e-08	2.99749e-06	9.31719
DTL	2.57652	6.84998	8.33474	2.48827e-08	3.03035e-06	9.30053
NELL2	-3.50801	8.79554	-8.29461	2.70367e-08	3.2692e-06	9.21853
CCNE2	1.59277	5.4647	8.29236	2.71634e-08	3.2692e-06	9.21392
RCC2	1.87602	10.4	8.25569	2.931e-08	3.50691e-06	9.13879
MAGI2-AS3	-2.00429	5.4258	-8.22236	3.1413e-08	3.73668e-06	9.07033
ESRP1	2.68307	8.73202	8.21431	3.19438e-08	3.77786e-06	9.05377
PCDH9	-2.58032	4.73854	-8.20928	3.22798e-08	3.79566e-06	9.04343
MEDAG	-1.7728	6.4704	-8.19989	3.29178e-08	3.84856e-06	9.0241
PRC1	3.14006	8.52129	8.18526	3.39378e-08	3.94526e-06	8.99394
ZNF367	2.65524	7.03713	8.16347	3.55168e-08	4.08244e-06	8.949
RTN1	-2.64559	5.82533	-8.15442	3.6195e-08	4.13715e-06	8.93031
CDON	-1.23808	5.27563	-8.14819	3.66695e-08	4.16809e-06	8.91743
HOXC6	-3.62751	8.47327	-8.13524	3.76768e-08	4.24298e-06	8.89065
NPTN-IT1	-2.23524	6.83001	-8.1344	3.7743e-08	4.24298e-06	8.88891
SOX17	4.42727	8.37243	8.12252	3.86931e-08	4.32602e-06	8.86434
HAS1	-3.1388	5.86925	-8.11971	3.89218e-08	4.32794e-06	8.85852
VANGL1	1.40276	7.64714	8.07137	4.30761e-08	4.76398e-06	8.75826
SPRY4-IT1	-1.6036	6.21988	-8.06859	4.33285e-08	4.76614e-06	8.75248
PEG3	-3.84655	6.08862	-8.05633	4.44596e-08	4.86441e-06	8.72701
MTHFD2	2.13174	7.63158	8.04936	4.51169e-08	4.91006e-06	8.7125
RPL36A	-1.54656	4.6627	-7.97246	5.30618e-08	5.684e-06	8.55209
GINS1	3.28656	8.27538	7.95944	5.4544e-08	5.80416e-06	8.52484
NDUFB9	2.22026	11.8297	7.95531	5.50231e-08	5.80416e-06	8.51619
KIF15	2.81501	6.98578	7.95417	5.51551e-08	5.80416e-06	8.51382
ANO5	-1.77669	4.80929	-7.95278	5.53183e-08	5.80416e-06	8.5109
CENPF	2.05404	6.42145	7.93923	5.69293e-08	5.94272e-06	8.48251
LAMA2	-1.65197	4.83489	-7.93633	5.72792e-08	5.94889e-06	8.47645
FLJ35700	-1.48067	4.71201	-7.93238	5.77617e-08	5.9687e-06	8.46815
PPAP2A	-2.30634	8.71423	-7.90892	6.07094e-08	6.24178e-06	8.41891
DEPDC1	2.06721	5.61059	7.9018	6.16337e-08	6.30513e-06	8.40396
CALCRL	-1.37948	5.1075	-7.86144	6.71571e-08	6.8254e-06	8.31904
CKS1B	2.41287	10.0503	7.85984	6.73867e-08	6.8254e-06	8.31567
SCRIB	2.17451	9.21955	7.8328	7.13845e-08	7.19471e-06	8.25864
SERTM1	-4.82265	6.21834	-7.80334	7.60195e-08	7.59802e-06	8.19638
FAM13A-AS1	-1.1703	5.94216	-7.80266	7.61288e-08	7.59802e-06	8.19496
MNS1	2.77037	6.42203	7.79427	7.75075e-08	7.66965e-06	8.17719
LRRC8B	1.17752	6.05163	7.79373	7.75961e-08	7.66965e-06	8.17606
TCERG1L	-1.56383	4.83414	-7.78955	7.82929e-08	7.70131e-06	8.16721
AIF1L	1.7153	7.06363	7.785	7.90584e-08	7.73941e-06	8.15758
CCNA2	1.91386	6.45375	7.77876	8.01217e-08	7.80614e-06	8.14436
CDC7	2.73881	7.09213	7.77059	8.15355e-08	7.90623e-06	8.12705
C1QTNF7	-1.40679	4.66064	-7.7549	8.43237e-08	8.08275e-06	8.09377
CLDN4	1.39532	7.85845	7.7537	8.45409e-08	8.08275e-06	8.09122
CRYM	-1.25868	6.93752	-7.71969	9.0941e-08	8.6542e-06	8.01898
BC048103 /// CSGALNACT1	-1.88426	5.79013	-7.6807	9.88977e-08	9.36781e-06	7.93594
SLC52A2	1.91835	7.79783	7.65292	1.05e-07	9.86818e-06	7.87666
DYRK2	1.56538	8.02898	7.65228	1.05145e-07	9.86818e-06	7.87529
WDR17	-1.35228	3.49714	-7.63344	1.09509e-07	1.02308e-05	7.83502
NEIL3	1.80031	5.79069	7.62096	1.12502e-07	1.04599e-05	7.80832
WDHD1	1.35366	4.99509	7.61899	1.12983e-07	1.04599e-05	7.80409
CLMP	-1.68838	5.17247	-7.61168	1.14781e-07	1.05323e-05	7.78845
PDGFRA	-1.02291	5.11124	-7.61163	1.14795e-07	1.05323e-05	7.78833
AGTR1	-1.54824	5.02249	-7.60673	1.16019e-07	1.055e-05	7.77783
CCDC64	-1.43361	6.45887	-7.59601	1.18742e-07	1.07498e-05	7.75486
RCN2	2.20952	9.89674	7.57765	1.2356e-07	1.11367e-05	7.71547
PDPN	-1.16299	5.47412	-7.55484	1.29823e-07	1.16499e-05	7.66649
MRPL14	1.83628	9.58381	7.54555	1.32469e-07	1.18355e-05	7.6465
PTTG1	2.53109	10.0131	7.54042	1.33954e-07	1.19161e-05	7.63546
RACGAP1	2.60961	8.66664	7.52636	1.3811e-07	1.22326e-05	7.6052
FOXQ1	3.89128	9.26678	7.49799	1.46905e-07	1.28999e-05	7.54404
MEGF6	-1.37761	6.71828	-7.4945	1.48026e-07	1.29428e-05	7.53651
DEPDC1B	3.61366	6.63486	7.49054	1.49308e-07	1.29605e-05	7.52797
ECM2	-2.05565	6.32359	-7.48997	1.49495e-07	1.29605e-05	7.52673
CDCA3	1.84906	7.55638	7.48509	1.51091e-07	1.30436e-05	7.5162
BICC1	-1.84526	6.10341	-7.48022	1.52705e-07	1.31275e-05	7.50568
KCNA4	-1.0772	4.46882	-7.4759	1.54149e-07	1.31962e-05	7.49636
PEX13	1.27009	6.27547	7.47098	1.55814e-07	1.32832e-05	7.48571
ABHD17C	2.26308	7.52493	7.46331	1.58442e-07	1.33314e-05	7.46914
NDC1	1.66279	8.18372	7.46301	1.58548e-07	1.33314e-05	7.46848
RRM2	3.06744	9.08617	7.46174	1.58986e-07	1.33314e-05	7.46574
GATA5	-1.45002	4.74837	-7.44865	1.63597e-07	1.3662e-05	7.43742
APOLD1	1.80971	6.78901	7.4378	1.67521e-07	1.39329e-05	7.41393
SAPCD2	1.20012	7.45191	7.42837	1.7101e-07	1.41655e-05	7.39351
ALDH1A1	-4.08248	6.54054	-7.42336	1.72895e-07	1.42638e-05	7.38265
ANTXR2	-1.21334	5.05521	-7.40032	1.81842e-07	1.49417e-05	7.33265
RAB7B	-1.19078	6.07293	-7.37743	1.91202e-07	1.5648e-05	7.28291
TFPI	-1.74694	4.5027	-7.37175	1.93596e-07	1.57808e-05	7.27058
MTUS1	-1.60839	6.67635	-7.36931	1.94638e-07	1.58027e-05	7.26526
PPM1E	-1.1756	4.54769	-7.3646	1.96661e-07	1.58413e-05	7.25502
ANKRD29	-2.74247	4.41348	-7.35998	1.98666e-07	1.59027e-05	7.24496
CMAHP	-1.23703	4.75122	-7.35926	1.98978e-07	1.59027e-05	7.2434
CLDN7	1.81776	7.80084	7.35476	2.00958e-07	1.59984e-05	7.2336
DSCC1	1.33579	6.08977	7.34974	2.03188e-07	1.60638e-05	7.22266
SNCAIP	-1.68058	5.62672	-7.34938	2.03349e-07	1.60638e-05	7.22187
TNFAIP8L1	1.4613	6.93957	7.34513	2.05254e-07	1.6094e-05	7.21263
FLNC	-1.6907	6.83153	-7.34502	2.05305e-07	1.6094e-05	7.21239
ORC6	1.85168	8.52324	7.34315	2.06152e-07	1.60987e-05	7.20831
MCOLN3	-1.37125	7.00547	-7.34118	2.07047e-07	1.61072e-05	7.20401
EZH2	2.48006	7.39522	7.32474	2.14671e-07	1.6637e-05	7.16817
MAD2L1	1.8157	6.68346	7.31411	2.19752e-07	1.69665e-05	7.14498
MAL2	2.3949	11.2488	7.30239	2.25502e-07	1.7345e-05	7.11938
TMEM150C	-1.88852	5.68203	-7.27248	2.40881e-07	1.84586e-05	7.05399
CTPS1	1.83483	8.23642	7.26595	2.4438e-07	1.86568e-05	7.0397
BMP2	-1.95713	5.56327	-7.2639	2.45489e-07	1.86608e-05	7.03521
TPX2	2.64689	8.51798	7.26249	2.46257e-07	1.86608e-05	7.03211
OLFML1	-3.4423	7.2184	-7.25584	2.499e-07	1.8867e-05	7.01755
AKT3	-1.28521	5.12009	-7.22655	2.6663e-07	2.00093e-05	6.95332
CNTN1	-1.40852	4.62285	-7.22594	2.66986e-07	2.00093e-05	6.95199
IDH2	2.48695	7.87739	7.2227	2.68908e-07	2.00797e-05	6.94488
NCAPH	1.89415	7.32279	7.20933	2.76995e-07	2.06084e-05	6.91551
GYPC	-1.04063	7.22889	-7.19997	2.82802e-07	2.09171e-05	6.89494
HJURP	1.79993	7.00282	7.19935	2.83189e-07	2.09171e-05	6.89358
CCNB2	1.00317	6.09585	7.16604	3.04918e-07	2.24411e-05	6.82029
CBX7	-1.91299	7.69294	-7.1624	3.07399e-07	2.25426e-05	6.81225
SYNPO2	-1.53015	5.20321	-7.15751	3.1076e-07	2.27076e-05	6.80147
EPT1	1.25016	6.80482	7.15454	3.12817e-07	2.27727e-05	6.79493
CLDN3	3.75431	8.38604	7.15143	3.14989e-07	2.27727e-05	6.78807
SORT1	1.32798	7.13927	7.14611	3.18733e-07	2.29068e-05	6.77635
FAT4	-1.40874	5.95932	-7.14562	3.19083e-07	2.29068e-05	6.77526
TES	1.07966	7.59586	7.13403	3.2742e-07	2.34231e-05	6.74969
SRD5A1	1.72754	7.7152	7.13218	3.28768e-07	2.34376e-05	6.74562
AQP1	-2.02134	6.8462	-7.12582	3.3346e-07	2.36895e-05	6.73157
NDC80	3.15304	7.7626	7.11839	3.39025e-07	2.40016e-05	6.71516
RNASE4	-3.35829	6.48202	-7.11352	3.42727e-07	2.40918e-05	6.70439
SMC4	1.75332	7.15968	7.11266	3.43379e-07	2.40918e-05	6.7025
OMD	-2.61141	4.90234	-7.11054	3.4501e-07	2.40918e-05	6.6978
OIP5	2.02094	6.13278	7.10226	3.51434e-07	2.44569e-05	6.67951
RAB11FIP3	-1.12371	6.41836	-7.09559	3.56704e-07	2.47395e-05	6.66475
BRIX1	1.28322	8.16057	7.0823	3.67441e-07	2.52276e-05	6.63534
NPTX1	-1.17961	5.58191	-7.07714	3.71706e-07	2.54351e-05	6.6239
SLC25A33	2.26287	8.51158	7.0717	3.76246e-07	2.566e-05	6.61186
MAP3K8	-2.14991	6.36084	-7.0644	3.82437e-07	2.59955e-05	6.59568
GPSM2	1.39597	6.26607	7.06077	3.85553e-07	2.60035e-05	6.58763
KLK6	3.96187	8.12742	7.06055	3.85746e-07	2.60035e-05	6.58713
CMTM7	1.31465	7.89751	7.05983	3.86366e-07	2.60035e-05	6.58554
STAR	-2.59945	5.34022	-7.0568	3.88985e-07	2.60939e-05	6.57884
CBS	1.77092	7.52257	7.05396	3.91467e-07	2.61745e-05	6.57253
C3orf70	-1.36033	4.28788	-7.04989	3.95051e-07	2.63282e-05	6.56349
NAA50	1.40288	8.02772	7.04167	4.02384e-07	2.67298e-05	6.54526
SKA3	1.10341	6.68977	7.03569	4.07802e-07	2.7002e-05	6.53199
LAMA4	-1.1271	5.44622	-7.02937	4.13618e-07	2.72988e-05	6.51795
PFKP	1.40759	7.58217	6.99847	4.43287e-07	2.90694e-05	6.44925
KIF23	1.7348	5.36872	6.98559	4.56282e-07	2.96446e-05	6.42059
MAMDC4	-1.8794	6.1468	-6.98547	4.56405e-07	2.96446e-05	6.42032
MRPL3	1.82095	11.8074	6.97056	4.71951e-07	3.04998e-05	6.3871
ATRNL1	-1.00775	4.53124	-6.97	4.72553e-07	3.04998e-05	6.38584
MPZL2	2.1526	7.75046	6.96722	4.75516e-07	3.05945e-05	6.37964
KBTBD11	-2.11965	5.39205	-6.96277	4.80295e-07	3.08051e-05	6.36972
KCNK6	-1.20049	5.12055	-6.92365	5.24496e-07	3.32235e-05	6.2824
CDCA7	1.66046	5.89165	6.90729	5.44206e-07	3.41548e-05	6.24581
ZNF644	1.09105	6.63208	6.90334	5.49073e-07	3.43548e-05	6.23698
GHR	-3.87519	4.98316	-6.89824	5.55432e-07	3.46468e-05	6.22556
RBMS3	-1.16802	4.98182	-6.88101	5.7747e-07	3.57397e-05	6.18696
PCDH17	-3.43218	6.90823	-6.88045	5.78193e-07	3.57397e-05	6.18572
RMI1	1.71435	8.00666	6.87467	5.85795e-07	3.61005e-05	6.17276
RPL39L	2.0053	6.68945	6.86026	6.0519e-07	3.69618e-05	6.14045
ZBTB16	-1.70029	5.77629	-6.85768	6.08737e-07	3.70677e-05	6.13466
CHN2	-1.02521	5.26363	-6.85552	6.11721e-07	3.71389e-05	6.1298
POLR2D	1.08365	6.57152	6.84773	6.226e-07	3.76876e-05	6.11232
MGC70870	1.30501	8.35687	6.83953	6.34257e-07	3.828e-05	6.09392
HMGA1	1.23436	6.57704	6.8374	6.37332e-07	3.83524e-05	6.08912
NOP58	1.78195	10.7557	6.82795	6.51125e-07	3.89533e-05	6.06788
MCM6	1.01025	6.95565	6.80595	6.84415e-07	4.08255e-05	6.01842
HSD11B1	-2.09509	6.4218	-6.8036	6.88076e-07	4.09245e-05	6.01312
ATP10D	-2.34167	7.1746	-6.79918	6.95009e-07	4.12171e-05	6.00318
PDGFD	-2.35954	7.11611	-6.77284	7.37854e-07	4.35057e-05	5.94384
S100A13	1.10201	7.44124	6.77087	7.41167e-07	4.35755e-05	5.93939
IL18	-2.88652	6.07055	-6.76729	7.4722e-07	4.38055e-05	5.93132
PLEKHH2	-1.86915	5.06096	-6.75846	7.62375e-07	4.44862e-05	5.9114
TRMT12	1.66481	8.26078	6.75735	7.64299e-07	4.44862e-05	5.9089
BMS1	1.07252	8.46659	6.75675	7.65354e-07	4.44862e-05	5.90753
TBC1D31	1.20873	5.75328	6.75305	7.71824e-07	4.47352e-05	5.89918
GPT2	2.01809	8.16388	6.75131	7.74886e-07	4.47858e-05	5.89526
SLC30A4	-1.17032	5.08486	-6.74468	7.86658e-07	4.52107e-05	5.8803
GNG11	-2.5874	5.87491	-6.72792	8.17272e-07	4.67078e-05	5.84242
CHRDL1	-3.9993	7.50337	-6.71859	8.34825e-07	4.7578e-05	5.82134
TPI1	1.32905	8.8011	6.71185	8.47757e-07	4.81145e-05	5.80609
TRAPPC10	-1.24167	5.64293	-6.71124	8.48941e-07	4.81145e-05	5.8047
KIF2C	1.65619	7.29884	6.7016	8.6782e-07	4.90486e-05	5.78288
NAP1L3	-3.70197	6.53031	-6.68668	8.97876e-07	5.03303e-05	5.74911
RMI2	1.64542	7.99554	6.68163	9.08293e-07	5.07751e-05	5.73766
C7	-2.9079	5.80865	-6.67786	9.16145e-07	5.10745e-05	5.72912
RUVBL1	1.72611	7.81651	6.67653	9.18936e-07	5.10908e-05	5.7261
SPON1	2.22672	9.14045	6.64936	9.77851e-07	5.39268e-05	5.66445
MYZAP	-1.61274	6.18352	-6.6477	9.81565e-07	5.39861e-05	5.66069
LOC401220	-1.34574	3.72345	-6.63728	1.00525e-06	5.50632e-05	5.63703
RNASEL	-1.30411	5.85853	-6.63673	1.00653e-06	5.50632e-05	5.63577
SGCG	-2.15539	6.48837	-6.63029	1.02147e-06	5.56088e-05	5.62115
AMDHD1	-1.35975	4.20768	-6.63009	1.02194e-06	5.56088e-05	5.6207
TMEM68	1.31546	7.42751	6.62636	1.03071e-06	5.59375e-05	5.61222
UNG	1.7727	9.23403	6.61633	1.05469e-06	5.70871e-05	5.58941
HILPDA	1.05922	7.7233	6.61427	1.05968e-06	5.72058e-05	5.58472
LOC202181	-1.05486	6.10209	-6.60065	1.09332e-06	5.88665e-05	5.55372
RNF157-AS1	1.98983	6.60076	6.59299	1.1127e-06	5.9753e-05	5.53628
LYPD6B	2.81207	8.96978	6.59036	1.11943e-06	5.99571e-05	5.5303
DOCK5	-1.35253	5.46339	-6.57265	1.16591e-06	6.21947e-05	5.48993
SCN7A	-1.0207	3.793	-6.57213	1.16729e-06	6.21947e-05	5.48876
PUF60	1.97164	9.48497	6.56304	1.19195e-06	6.3264e-05	5.46802
GIPC2	-2.55383	4.86915	-6.56246	1.19354e-06	6.3264e-05	5.4667
B3GALT2	-1.59535	3.36815	-6.55424	1.2163e-06	6.41677e-05	5.44796
CDH11	-2.13185	6.29153	-6.55404	1.21687e-06	6.41677e-05	5.4475
C8orf88	-1.78128	5.30521	-6.55115	1.22499e-06	6.42998e-05	5.44089
RECQL4	1.06856	7.31607	6.55091	1.22566e-06	6.42998e-05	5.44036
KPNA2	1.87965	10.5632	6.54829	1.23307e-06	6.45232e-05	5.43437
TMEM200A	-2.83087	6.63306	-6.53804	1.26252e-06	6.58956e-05	5.41096
GPR133	-3.46021	5.62605	-6.5278	1.29264e-06	6.69554e-05	5.38756
GNL2	1.64111	9.33913	6.51111	1.34332e-06	6.923e-05	5.34941
SHC2	-1.31578	6.51321	-6.50747	1.35462e-06	6.96349e-05	5.3411
PLEKHF2	1.79658	7.31902	6.49769	1.38552e-06	7.08696e-05	5.31872
TACC3	2.48075	6.76022	6.49219	1.40323e-06	7.14181e-05	5.30612
KIF18A	2.04552	6.01472	6.48839	1.41558e-06	7.18678e-05	5.29742
MCC	-1.78118	6.97809	-6.48249	1.43501e-06	7.26738e-05	5.2839
NR3C2	-2.1649	6.01535	-6.48003	1.44317e-06	7.27448e-05	5.27827
SIGLEC11	-1.76498	4.6312	-6.47993	1.44352e-06	7.27448e-05	5.27803
HMMR	2.27815	7.68152	6.47489	1.46041e-06	7.34151e-05	5.26649
HNRNPAB	1.72191	10.9414	6.46393	1.49786e-06	7.47474e-05	5.24137
LMNB1	2.3712	6.91663	6.46288	1.50152e-06	7.47474e-05	5.23895
PAX8	1.07243	6.77956	6.4613	1.50702e-06	7.48388e-05	5.23532
MMP7	4.59097	8.75053	6.45797	1.51865e-06	7.5234e-05	5.22769
GPR56	1.45425	7.32249	6.45065	1.54456e-06	7.63327e-05	5.21091
ARHGAP44	-1.90967	6.09396	-6.44519	1.56419e-06	7.71164e-05	5.19838
PARPBP	1.42227	5.6114	6.41486	1.67798e-06	8.2386e-05	5.12871
DCAF13	1.06897	6.59102	6.414	1.68134e-06	8.2386e-05	5.12673
ARPC5L	1.47062	8.32177	6.41273	1.68628e-06	8.2386e-05	5.12381
TSPAN8	-4.00649	6.2134	-6.41147	1.69121e-06	8.2386e-05	5.12092
S100A10	-2.13374	8.18013	-6.40375	1.72178e-06	8.36758e-05	5.10315
PUS7	2.15645	8.53316	6.39935	1.7394e-06	8.41328e-05	5.09304
LINC00842	-1.05865	4.73571	-6.39752	1.7468e-06	8.42913e-05	5.08883
RAD21	1.26071	9.56941	6.39401	1.76111e-06	8.47818e-05	5.08074
MST1	-1.88328	8.71188	-6.39126	1.77235e-06	8.51228e-05	5.07442
DDX21	1.40806	10.1354	6.38876	1.78267e-06	8.52183e-05	5.06866
LOC100996412	-1.59513	6.29907	-6.38461	1.79993e-06	8.5843e-05	5.0591
CP	4.22705	8.55289	6.36806	1.87044e-06	8.86093e-05	5.02098
ZHX1-C8orf76	1.05748	6.53357	6.36304	1.89237e-06	8.94178e-05	5.00942
LRFN5	-1.26116	5.34101	-6.35712	1.91858e-06	9.04475e-05	4.99577
OVOL2	1.14254	6.52875	6.35529	1.92677e-06	9.06246e-05	4.99154
ABCA6	-1.194	4.41384	-6.35251	1.93924e-06	9.07935e-05	4.98514
PAICS	1.01172	7.38726	6.34994	1.95089e-06	9.11304e-05	4.9792
STIM2	-1.03447	5.98075	-6.34633	1.9673e-06	9.16879e-05	4.97089
ANP32E	1.19596	9.55849	6.34068	1.99336e-06	9.26913e-05	4.95783
HBD	-1.60014	5.84589	-6.33416	2.02379e-06	9.3893e-05	4.9428
MUC1	2.47149	8.98846	6.32432	2.0707e-06	9.56354e-05	4.92007
KIF18B	1.97099	7.47562	6.32058	2.0888e-06	9.60378e-05	4.91144
SLC50A1	1.06334	6.51289	6.31799	2.10144e-06	9.61961e-05	4.90545
DPP10	-3.45967	4.72173	-6.31795	2.10165e-06	9.61961e-05	4.90535
TACC1	-1.38134	5.68117	-6.3059	2.16146e-06	9.83814e-05	4.87751
SSB	1.59126	8.91027	6.30543	2.16381e-06	9.83814e-05	4.87643
RAD54B	2.19795	6.40374	6.30168	2.1828e-06	9.88057e-05	4.86777
GRHL2	1.15207	7.51277	6.29964	2.19321e-06	9.90577e-05	4.86305
CDCA5	1.73899	7.42386	6.2911	2.2373e-06	0.000100605	4.8433
CDK1	2.26707	7.21096	6.28238	2.28329e-06	0.000102447	4.82312
EPB42	-1.30601	6.20993	-6.2811	2.2901e-06	0.000102528	4.82016
NR2F1-AS1	-1.79848	5.52938	-6.27984	2.29684e-06	0.000102605	4.81725
E2F7	1.55408	6.65299	6.26832	2.35943e-06	0.000104943	4.79058
NCAPG2	1.41314	6.76779	6.26478	2.379e-06	0.000105495	4.78238
PSRC1	1.82869	6.98295	6.26422	2.38213e-06	0.000105495	4.78107
ACTL6A	1.79343	9.82873	6.26048	2.40305e-06	0.000106191	4.7724
RCAN3	1.19269	5.97565	6.25743	2.42021e-06	0.000106719	4.76534
GALNT6	1.67841	6.50433	6.2504	2.46027e-06	0.000108252	4.74906
PBK	2.91782	7.37507	6.24397	2.49752e-06	0.000109186	4.73415
MREG	1.92236	7.3113	6.23811	2.53201e-06	0.000110279	4.72054
TSPAN15	1.65598	7.54725	6.23789	2.53328e-06	0.000110279	4.72005
BCHE	-5.5825	5.63167	-6.23495	2.55076e-06	0.000110804	4.71323
SLC31A2	-1.65895	7.4116	-6.22213	2.62841e-06	0.000113694	4.68348
MAF	-1.54825	4.94056	-6.21084	2.69879e-06	0.00011623	4.65726
CDC20	2.67185	8.14036	6.20094	2.76212e-06	0.000118476	4.63426
RFPL1S	-1.44639	3.893	-6.19975	2.76983e-06	0.000118558	4.63149
LINC00473	-1.57812	4.57684	-6.18627	2.8587e-06	0.000121599	4.60016
NRAS	1.35495	9.07125	6.17888	2.90865e-06	0.000123467	4.58298
CFH	-3.5105	7.46529	-6.1764	2.92562e-06	0.00012393	4.57721
ADRA2A	-2.03568	6.23985	-6.15272	3.09278e-06	0.000130017	4.5221
ACN9	1.80921	7.26391	6.1509	3.10601e-06	0.000130223	4.51786
PRRX1	-1.73685	5.84099	-6.1485	3.12355e-06	0.000130691	4.51228
GAPDH	1.31708	12.5402	6.14591	3.1426e-06	0.00013122	4.50624
FAM171A1	1.94779	9.12417	6.14317	3.1629e-06	0.000131798	4.49986
FABP4	-1.42188	4.53828	-6.13514	3.22314e-06	0.000133241	4.48114
GPR160	3.29065	7.58265	6.13508	3.22358e-06	0.000133241	4.48101
IRAK3	-1.04986	4.96585	-6.12837	3.27485e-06	0.000134879	4.46536
UBE2T	2.23418	7.22697	6.11236	3.40046e-06	0.000139417	4.42802
PRKX	2.63948	7.61782	6.11111	3.41051e-06	0.000139417	4.4251
CSE1L	1.48991	9.3301	6.11069	3.41388e-06	0.000139417	4.42412
MCM10	1.51244	6.31584	6.089	3.59273e-06	0.000145415	4.37347
DSN1	1.21365	5.96431	6.08858	3.59628e-06	0.000145415	4.37249
FGF13	-3.0598	7.09147	-6.08516	3.62537e-06	0.000146302	4.3645
HDGF	1.59569	11.7126	6.08422	3.63342e-06	0.000146338	4.3623
ASPM	1.79531	6.35785	6.08176	3.65452e-06	0.000146614	4.35656
VRK1	1.88791	8.02908	6.08092	3.66177e-06	0.000146614	4.35459
ASTN1	-1.91983	4.21855	-6.07897	3.67855e-06	0.000146839	4.35006
KIF20B	1.36638	7.11787	6.07861	3.68175e-06	0.000146839	4.3492
MIS18A	1.4851	6.82154	6.07413	3.72077e-06	0.000148107	4.33874
POLE2	1.56007	7.06732	6.0717	3.74217e-06	0.000148278	4.33305
HPDL	1.37051	5.351	6.07051	3.75271e-06	0.000148278	4.33026
KLF3-AS1	-1.23955	4.9621	-6.06835	3.77184e-06	0.000148693	4.32522
ZNF211	-1.10812	7.54187	-6.0581	3.86411e-06	0.000152038	4.30125
UPK3B	-3.1636	6.87539	-6.04165	4.01698e-06	0.000157146	4.26277
PPM1G	1.37268	8.61854	6.03822	4.04967e-06	0.000157372	4.25473
IRF6	1.00307	6.23958	6.03802	4.05158e-06	0.000157372	4.25427
DOCK11	-2.15191	5.87048	-6.0305	4.12419e-06	0.00015951	4.23665
HN1	1.42585	8.03643	6.02839	4.14472e-06	0.000159782	4.23173
RGS22	-1.18945	6.06351	-6.02778	4.15072e-06	0.000159782	4.23029
MASTL	1.47692	7.21475	6.02738	4.15465e-06	0.000159782	4.22936
FAM64A	1.47929	6.97367	6.02512	4.17688e-06	0.000160336	4.22406
PLCL2	-1.03806	5.29542	-6.02406	4.18737e-06	0.000160437	4.22158
DDR2	-1.32494	6.92439	-6.01575	4.27044e-06	0.0001627	4.20209
DMD	-1.02588	4.82385	-6.01497	4.27823e-06	0.0001627	4.20029
TUBA1B	1.14521	11.18	6.01054	4.32332e-06	0.000163806	4.18989
MCUR1	2.19286	8.15912	6.00572	4.37281e-06	0.000165069	4.1786
LIX1L	-1.16821	6.66575	-5.99733	4.46051e-06	0.000167664	4.15891
PGR	-2.25981	5.85974	-5.9968	4.46612e-06	0.000167664	4.15767
BNC2	-2.13968	6.8041	-5.99021	4.53624e-06	0.000169984	4.14222
SEC24C	1.21301	8.71812	5.98813	4.55865e-06	0.000170512	4.13733
GSTM3	-1.68213	7.3654	-5.98523	4.59003e-06	0.000171254	4.13053
RGS4	-2.08316	6.66044	-5.98301	4.61422e-06	0.000171254	4.12532
DCDC2	1.74287	5.23618	5.98268	4.61779e-06	0.000171254	4.12455
LRP2	-2.13857	7.1751	-5.98245	4.62033e-06	0.000171254	4.124
SPC25	2.46224	5.73788	5.97857	4.66298e-06	0.000172522	4.11489
PCNA	1.78523	10.0802	5.97733	4.67664e-06	0.000172715	4.11199
BCL11A	2.14404	7.53851	5.97478	4.70492e-06	0.000173446	4.10601
ATAD2	1.90275	7.48171	5.97317	4.72295e-06	0.000173798	4.10222
TSHZ3	-1.43249	6.6991	-5.9707	4.75059e-06	0.000174501	4.09643
GPD2	1.06048	6.54281	5.96575	4.80663e-06	0.000175492	4.08481
ASAP2	1.70108	9.36516	5.96138	4.85666e-06	0.00017681	4.07454
BMP4	-1.75542	7.18273	-5.95747	4.90189e-06	0.000177535	4.06535
PRIMA1	2.01397	8.54832	5.95741	4.90261e-06	0.000177535	4.0652
CCDC69	-1.29914	4.0458	-5.9543	4.93878e-06	0.000178529	4.05791
RFC2	1.17325	7.17994	5.95333	4.95018e-06	0.000178625	4.05563
CIRBP	-1.29275	8.52763	-5.94907	5.0004e-06	0.00018012	4.04562
NUDT15	1.67479	7.85111	5.93949	5.11525e-06	0.000183611	4.0231
SORD	1.35454	7.10474	5.93502	5.16986e-06	0.000185246	4.01257
MKI67	1.21604	6.6716	5.93197	5.20736e-06	0.000186263	4.00541
PLS1	2.04412	8.24698	5.92499	5.29435e-06	0.000189044	3.98898
CDKN3	2.05468	6.35625	5.92396	5.30721e-06	0.000189174	3.98657
YEATS4	1.85423	6.71262	5.92054	5.35053e-06	0.000190386	3.97851
MOB1A	1.19988	8.77819	5.9195	5.36379e-06	0.000190494	3.97606
FAM60A	1.91901	9.14252	5.91884	5.3722e-06	0.000190494	3.97451
SLC35F2	1.61699	8.78285	5.91283	5.44934e-06	0.000191899	3.96037
TBC1D4	-1.51503	7.49097	-5.91111	5.47158e-06	0.000192132	3.95633
DNAJC9	1.02774	7.0567	5.91087	5.47472e-06	0.000192132	3.95577
FRY	-1.57123	5.32947	-5.90834	5.50773e-06	0.000192365	3.94981
MRPS18A	1.3987	8.23108	5.90498	5.55183e-06	0.000193181	3.9419
LMNB2	1.63978	7.34911	5.89028	5.74917e-06	0.000198361	3.90727
KLHDC1	-1.24274	4.15731	-5.88069	5.8818e-06	0.000201778	3.88466
ILDR2	-2.28245	5.23997	-5.88061	5.88288e-06	0.000201778	3.88448
CCDC113	2.3389	6.39682	5.87996	5.89203e-06	0.000201778	3.88294
FDPS	1.44202	9.53793	5.87957	5.89751e-06	0.000201778	3.88201
EHF	1.66388	5.81611	5.87845	5.91313e-06	0.000201974	3.87939
ST3GAL5	-1.46921	8.76521	-5.87389	5.9777e-06	0.0002035	3.86863
FAM155A	-1.52884	4.3475	-5.8707	6.02312e-06	0.000204611	3.86112
CMYA5	-1.14594	6.20874	-5.8702	6.03033e-06	0.000204611	3.85994
INTU	-1.64337	5.87056	-5.86829	6.05785e-06	0.000205205	3.85542
MCTP2	-1.21635	5.72551	-5.86638	6.0854e-06	0.000205797	3.85092
SLC5A6	1.21841	7.88577	5.86373	6.12383e-06	0.000206648	3.84468
TYMS	1.2507	7.24092	5.86216	6.14676e-06	0.000206648	3.84098
KIF2A	1.2786	7.56465	5.86188	6.15094e-06	0.000206648	3.8403
TATDN1	1.69677	9.9845	5.85691	6.22407e-06	0.00020821	3.82859
TUBA1C	1.45397	12.529	5.85665	6.22798e-06	0.00020821	3.82797
FANCI	1.34365	7.06404	5.84755	6.36433e-06	0.000211519	3.8065
ST14	1.31584	6.81633	5.84729	6.36832e-06	0.000211519	3.80588
BBS12	-1.5289	6.72981	-5.83972	6.48408e-06	0.000214667	3.78802
DPY30	1.67181	9.6796	5.83698	6.52657e-06	0.000215725	3.78154
CMTM6	1.14561	7.1915	5.8343	6.56832e-06	0.000216405	3.77522
UBE2C	2.27367	8.54055	5.82865	6.65741e-06	0.000218988	3.76187
ZNF641	-1.10946	6.78655	-5.81418	6.89098e-06	0.000226307	3.72769
ABCF1	1.24134	9.21982	5.81276	6.91433e-06	0.00022671	3.72434
TPM4	1.178	8.2391	5.81142	6.93651e-06	0.000227074	3.72116
SLC46A3	-2.02903	8.07559	-5.80877	6.98046e-06	0.000228147	3.7149
SIX4	1.09072	5.88957	5.80206	7.0932e-06	0.000231462	3.69902
NCAPG	2.45013	5.91138	5.79313	7.24599e-06	0.000235698	3.6779
RFC4	2.01539	9.11897	5.79312	7.24604e-06	0.000235698	3.67789
PAIP1	1.48163	9.51737	5.77407	7.58332e-06	0.000245887	3.6328
CCT5	1.39362	8.07981	5.77281	7.60614e-06	0.000246237	3.62982
CEP72	1.11154	6.06681	5.76575	7.7355e-06	0.000249242	3.61311
FBXL7	-1.87121	6.656	-5.76372	7.77308e-06	0.000250059	3.60831
LPAR3	2.61326	6.86599	5.75472	7.94213e-06	0.000254696	3.58699
ERCC6L	1.3249	5.71519	5.7488	8.05528e-06	0.000257846	3.57297
FOLR1	4.26933	9.0905	5.74827	8.06555e-06	0.000257846	3.5717
BACH2	-1.25073	5.86167	-5.74598	8.10992e-06	0.00025886	3.56627
POLR2H	1.59819	10.402	5.7393	8.24049e-06	0.000262209	3.55044
TIMELESS	1.05318	6.75008	5.73558	8.31408e-06	0.00026373	3.54163
PKD2	-2.37218	7.18551	-5.72434	8.54071e-06	0.000268835	3.51498
TPP1	-1.0546	7.44773	-5.71902	8.65015e-06	0.000271445	3.50236
FLAD1	1.12685	7.01246	5.7132	8.77167e-06	0.000274541	3.48854
ASH1L-AS1	1.4371	8.26502	5.71301	8.77564e-06	0.000274541	3.48809
LYPLA1	1.3066	9.65488	5.71079	8.82245e-06	0.000275584	3.48282
TCEAL3	-1.39554	9.96724	-5.70257	8.99789e-06	0.000280208	3.46331
FAM174B	1.41432	7.75655	5.69908	9.07328e-06	0.000282127	3.45504
LINC00294	-1.04189	7.0347	-5.69705	9.11766e-06	0.000283076	3.45021
KIAA0226L	-1.67417	6.36247	-5.68583	9.36601e-06	0.000289033	3.42358
LINC01279	-3.41955	6.30907	-5.68417	9.4034e-06	0.000289548	3.41963
FKBPL	1.03569	7.37997	5.68098	9.47576e-06	0.000291102	3.41204
BEX1	-2.75279	8.01715	-5.67973	9.50406e-06	0.000291534	3.40908
TMEM255A	-3.91717	5.29693	-5.67727	9.56035e-06	0.000292822	3.40323
PDE9A	1.05497	5.11864	5.67321	9.65382e-06	0.000295242	3.39359
ATG101	1.53626	8.69751	5.67246	9.6713e-06	0.000295335	3.3918
YES1	1.14576	7.51907	5.66916	9.74807e-06	0.000297124	3.38397
RPIA	1.20186	9.19932	5.66807	9.77373e-06	0.000297124	3.38136
HSPE1	1.56734	10.4088	5.66749	9.78725e-06	0.000297124	3.37999
UCP2	1.68667	8.88042	5.66743	9.78854e-06	0.000297124	3.37986
AMHR2	-1.13849	6.32858	-5.66684	9.80247e-06	0.000297124	3.37846
EEF1E1	1.04736	6.67044	5.66415	9.86587e-06	0.000298603	3.37207
KCNB1	-1.05019	5.42686	-5.65925	9.98262e-06	0.000301665	3.36041
LOC100134445	-1.98522	7.85915	-5.65867	9.99652e-06	0.000301665	3.35903
PHACTR3	-1.09225	4.4567	-5.64469	1.03377e-05	0.000310585	3.32579
BRIP1	1.22238	5.0736	5.63498	1.05817e-05	0.00031745	3.30268
FAM117B	1.00656	6.65267	5.63427	1.05998e-05	0.000317528	3.30099
TDRD10	-1.07849	5.0063	-5.63231	1.06496e-05	0.000318555	3.29634
EIF6	1.73388	9.21224	5.63036	1.06998e-05	0.000319249	3.29168
CTXN3	-1.05668	4.17785	-5.62563	1.0822e-05	0.000321829	3.28043
NBEA	-1.62218	5.40111	-5.62389	1.08674e-05	0.000322709	3.27629
BZW2	1.87406	10.4132	5.62322	1.08848e-05	0.000322758	3.2747
YPEL4	-1.0652	4.43766	-5.61829	1.10147e-05	0.000325667	3.26295
DPP10-AS1	-1.45364	5.29846	-5.61353	1.11413e-05	0.000328131	3.25163
RPL8	1.2842	13.0305	5.6122	1.11772e-05	0.00032857	3.24845
TTC32	1.80812	7.5432	5.61111	1.12064e-05	0.000328956	3.24586
LINC01139	1.8191	7.70117	5.6087	1.12715e-05	0.000330394	3.24012
ZWILCH	1.28765	7.09163	5.59451	1.1663e-05	0.000340405	3.20631
LCLAT1	1.52894	9.63068	5.58997	1.1791e-05	0.000343323	3.1955
MGP	-2.15336	5.17188	-5.58969	1.17991e-05	0.000343323	3.19482
LOC729680	1.87991	7.98552	5.58919	1.18133e-05	0.000343323	3.19363
ZNF385B	-1.04229	4.09769	-5.58627	1.18966e-05	0.000345253	3.18667
SERPINB9	-1.00423	6.54621	-5.58148	1.20343e-05	0.000348238	3.17527
PITPNC1	-1.06099	6.2345	-5.57872	1.21147e-05	0.000349204	3.16867
RAD54L	1.23022	6.90538	5.57658	1.21772e-05	0.000350416	3.16358
ME1	-1.67278	6.12003	-5.57306	1.22808e-05	0.000352406	3.15519
XPR1	1.54388	7.9596	5.56974	1.23795e-05	0.00035474	3.14726
TMEM125	1.39093	8.69317	5.56692	1.24639e-05	0.000356192	3.14053
C21orf91	1.09884	8.90009	5.56688	1.2465e-05	0.000356192	3.14044
ATP6V0E2	1.66833	8.99098	5.56545	1.25079e-05	0.000356529	3.13704
IGSF11	-1.63876	4.84058	-5.56533	1.25116e-05	0.000356529	3.13675
KCNJ8	-1.61924	6.38633	-5.56249	1.25976e-05	0.000358008	3.12997
KLK7	2.98234	8.94697	5.56246	1.25985e-05	0.000358008	3.12989
ZNF165	2.48406	6.34736	5.56176	1.26198e-05	0.000358115	3.12822
PIP5K1B	-1.12054	5.44307	-5.56018	1.26676e-05	0.000358975	3.12447
HHIP-AS1	-1.19392	5.51714	-5.55946	1.26899e-05	0.000359107	3.12274
RPL23AP32	-1.17973	6.74462	-5.54627	1.30997e-05	0.000369684	3.09126
WSB1	-1.21539	6.56659	-5.54274	1.32114e-05	0.000372322	3.08285
MLF2	1.55273	9.40336	5.5396	1.3312e-05	0.000374259	3.07534
MRPS16	1.25445	8.13997	5.53802	1.33626e-05	0.000375032	3.07159
TK1	1.95507	7.62792	5.52951	1.36399e-05	0.000381768	3.05125
PCCB	1.10791	6.59792	5.52792	1.36921e-05	0.000382705	3.04747
CADPS2	-2.524	8.0386	-5.52223	1.38814e-05	0.000387467	3.03387
COLEC12	-2.57901	6.57946	-5.51812	1.40198e-05	0.000390266	3.02405
NR0B1	-1.2436	4.53855	-5.51321	1.41867e-05	0.000393307	3.01233
PRR11	1.31611	9.67208	5.50572	1.44456e-05	0.000399941	2.99443
LRRN4CL	-1.68076	5.98732	-5.50403	1.45046e-05	0.000401033	2.99039
WDR43	1.61135	7.76088	5.50267	1.45523e-05	0.000401809	2.98714
CACNA2D1	-1.59147	5.72024	-5.50211	1.45722e-05	0.000401816	2.98579
TIGD1	1.67156	6.66635	5.50061	1.46251e-05	0.000402689	2.9822
GGCT	1.55374	11.3204	5.50009	1.46432e-05	0.000402689	2.98097
PCED1B	-1.17822	7.0706	-5.49445	1.48442e-05	0.000407668	2.96748
EPHX4	3.20339	6.18539	5.49248	1.49149e-05	0.00040906	2.96277
KLHDC8A	-1.5705	7.17968	-5.48716	1.51077e-05	0.000413793	2.95006
MAGEF1	1.57357	7.90135	5.48648	1.51325e-05	0.000413918	2.94844
ANG	-1.74875	5.87922	-5.48426	1.52142e-05	0.000415597	2.94311
CRLS1	-1.0956	6.56091	-5.48207	1.52946e-05	0.000416198	2.93789
IRX5	-1.29138	4.54706	-5.482	1.52972e-05	0.000416198	2.93772
MSH2	1.61026	7.76964	5.47974	1.53811e-05	0.000417925	2.9323
RNF139	1.53183	9.93508	5.4781	1.54421e-05	0.000419026	2.92838
PIGW	1.70478	6.7644	5.47297	1.56348e-05	0.000423693	2.91611
TTC30A	2.3731	6.38872	5.47221	1.56635e-05	0.000423909	2.91429
TRIM6	-1.64637	6.87456	-5.47073	1.57198e-05	0.000424871	2.91074
RAB33A	-1.13379	5.29648	-5.46462	1.59534e-05	0.000430048	2.89614
SMARCC1	1.04575	8.13329	5.46404	1.5976e-05	0.000430092	2.89474
DPP3	1.18555	8.18277	5.4618	1.60625e-05	0.000431852	2.88939
NDUFS6	1.56378	11.9537	5.44778	1.66166e-05	0.000443833	2.85582
HYMAI	-1.42571	5.0992	-5.44522	1.67198e-05	0.000446007	2.8497
ASRGL1	2.61245	9.15959	5.44109	1.68877e-05	0.000449899	2.83981
JADE3	1.4307	8.05747	5.43698	1.70567e-05	0.00045322	2.82995
ITM2A	-1.50778	7.55298	-5.43505	1.71363e-05	0.000454745	2.82534
HHIP	-1.77442	4.40635	-5.43246	1.72439e-05	0.000456418	2.81915
PLCE1	-1.14766	4.64097	-5.42534	1.75441e-05	0.000463163	2.80207
CTHRC1	3.05124	10.0779	5.42302	1.76429e-05	0.000465172	2.79651
EZR	-1.30116	7.2635	-5.42004	1.77706e-05	0.000467937	2.78937
C8orf76	1.68442	8.04658	5.41809	1.78545e-05	0.000469465	2.78471
MEOX2	-1.52697	3.45671	-5.41763	1.78745e-05	0.000469465	2.7836
MYO6	1.33034	7.65005	5.41258	1.80942e-05	0.000474017	2.77151
PPAT	1.28932	7.87476	5.41089	1.81685e-05	0.000475356	2.76746
ZNF516	-1.25927	6.74788	-5.40389	1.84793e-05	0.000482253	2.75067
C12orf73	1.46376	7.91747	5.3963	1.88224e-05	0.000490582	2.73247
PLA2G2A	-2.01524	6.34231	-5.38638	1.92803e-05	0.000501238	2.70869
TBCC	1.2674	8.37512	5.37344	1.98949e-05	0.000515906	2.67764
ARHGEF19	1.00707	6.12943	5.37243	1.99437e-05	0.000516516	2.67521
SASS6	1.4838	6.95147	5.37017	2.00534e-05	0.000518701	2.66979
KNSTRN	1.41419	7.40754	5.36885	2.01176e-05	0.000519164	2.66663
TNNT1	2.58504	7.94841	5.36774	2.01717e-05	0.000519789	2.66397
MYB	1.15716	4.80017	5.36196	2.04565e-05	0.000524963	2.6501
LZTS3	1.09275	8.26656	5.36159	2.04751e-05	0.000524963	2.6492
SCGB2A1	4.5723	8.45476	5.35912	2.05981e-05	0.000527455	2.64327
TLCD1	1.89444	6.90328	5.35221	2.09462e-05	0.000535073	2.62669
SAC3D1	1.92898	8.97319	5.35218	2.09479e-05	0.000535073	2.62661
RPRM	-1.47107	6.46008	-5.34562	2.12839e-05	0.000541627	2.61087
PRICKLE2	-1.53603	6.34218	-5.33978	2.15882e-05	0.000548008	2.59683
CENPE	1.51379	6.75564	5.33309	2.19417e-05	0.000555616	2.58076
NLGN4X	-1.69159	5.4248	-5.3312	2.20424e-05	0.000557463	2.57623
PTPRZ1	-2.4213	4.01214	-5.32736	2.22487e-05	0.000560602	2.56701
TOPBP1	1.3921	8.91788	5.32148	2.25688e-05	0.000567968	2.55289
PRR9	-2.22431	5.54659	-5.31693	2.28201e-05	0.000572966	2.54193
INMT	-1.75899	4.89537	-5.31305	2.30361e-05	0.00057622	2.53262
COX5A	1.44764	8.94556	5.31294	2.30422e-05	0.00057622	2.53235
RHNO1	1.31812	7.1802	5.31266	2.30581e-05	0.00057622	2.53167
DERL1	1.10713	8.29937	5.31226	2.30805e-05	0.00057622	2.53071
B4GALT5	1.53174	9.99991	5.31202	2.30939e-05	0.00057622	2.53014
SLC5A3	1.39237	7.09661	5.30491	2.34962e-05	0.000584833	2.51306
GRTP1	1.08532	5.42473	5.3009	2.37263e-05	0.000589841	2.50342
ADCYAP1	-1.23852	5.04036	-5.29977	2.37915e-05	0.000590388	2.5007
CBLN2	-1.43131	6.01446	-5.29952	2.38059e-05	0.000590388	2.5001
COL4A2	1.28132	7.49456	5.29876	2.385e-05	0.000590765	2.49827
NEFH	-2.65298	5.99928	-5.29726	2.39371e-05	0.000592204	2.49467
CABLES2	1.06435	8.02094	5.28892	2.44275e-05	0.000602153	2.47461
ASF1B	1.47889	7.05542	5.28757	2.45081e-05	0.000603412	2.47136
SMC6	1.10733	7.24611	5.28374	2.47371e-05	0.000607588	2.46216
GPM6B	2.0952	6.93105	5.28321	2.47695e-05	0.000607654	2.46087
GSTP1	1.50625	9.26045	5.28043	2.49376e-05	0.000611047	2.45417
CDC6	1.75068	4.80956	5.27082	2.55272e-05	0.000624743	2.43107
VGLL3	-2.83616	5.50779	-5.26837	2.56796e-05	0.000626975	2.42518
DPH2	1.08488	7.66321	5.26272	2.60353e-05	0.000634146	2.41158
GALNT3	1.15888	7.90672	5.25798	2.63377e-05	0.000640749	2.40016
E2F3	1.16651	8.41936	5.25664	2.64238e-05	0.000641305	2.39694
CENPH	1.48482	6.3748	5.25639	2.64397e-05	0.000641305	2.39634
LOC439911	1.66325	7.85125	5.25616	2.64546e-05	0.000641305	2.39578
EHHADH	1.90334	7.1314	5.24849	2.6953e-05	0.000651072	2.37733
KLK8	1.60603	6.3375	5.24536	2.71592e-05	0.00065408	2.3698
RBM38	1.76412	7.11397	5.23982	2.75284e-05	0.000660295	2.35644
CCDC34	1.01057	6.56275	5.23736	2.76934e-05	0.000663474	2.35054
FJX1	2.28791	7.50773	5.23471	2.78732e-05	0.00066645	2.34414
XPOT	1.3223	9.69668	5.23385	2.79314e-05	0.00066645	2.34208
DCN	-1.75998	6.99716	-5.23361	2.79479e-05	0.00066645	2.34149
DHTKD1	1.37116	7.86682	5.23307	2.79848e-05	0.000666552	2.34019
LGR6	2.54094	7.0599	5.23249	2.80243e-05	0.000666719	2.33879
DUXAP10	2.92587	6.23066	5.23121	2.81115e-05	0.000668015	2.33572
SPAG1	1.80175	5.73587	5.2293	2.82429e-05	0.000670358	2.33112
KCNT2	-2.76431	5.21975	-5.22292	2.86853e-05	0.000678743	2.31575
GEN1	1.02904	4.63981	5.22215	2.87392e-05	0.00067899	2.31389
IGFBP4	-1.61539	7.03263	-5.20833	2.97233e-05	0.000698049	2.28061
SPINT2	1.79724	11.5931	5.20758	2.97776e-05	0.000698049	2.27881
BDH2	-1.77296	6.88573	-5.20639	2.98647e-05	0.000698665	2.27592
TMEM65	1.32795	6.96843	5.20142	3.02286e-05	0.000706025	2.26395
AS3MT	-1.28862	5.80023	-5.19642	3.05996e-05	0.000712249	2.25189
RAB10	1.23584	10.4699	5.18549	3.14256e-05	0.000729816	2.22557
NUP155	1.28626	7.63797	5.17914	3.19166e-05	0.00073954	2.21025
NSUN2	1.13316	9.60999	5.17122	3.25392e-05	0.000751413	2.19116
METRNL	1.37635	7.41739	5.16503	3.30343e-05	0.000761129	2.17623
MUM1	-1.08955	7.36943	-5.16389	3.31267e-05	0.000762399	2.17347
PFDN2	1.27226	9.04453	5.16339	3.3167e-05	0.000762469	2.17227
CHKB	-1.34735	8.05208	-5.16002	3.34414e-05	0.000767913	2.16413
SBSPON	-3.18771	7.06197	-5.15941	3.34912e-05	0.000768195	2.16266
PAK6	1.04854	7.0066	5.15881	3.35404e-05	0.000768461	2.16121
TMTC1	2.14216	6.63097	5.15678	3.37068e-05	0.00077141	2.15632
MBNL3	-1.49188	6.9521	-5.14999	3.42702e-05	0.000782833	2.13994
PYCRL	1.67794	6.23858	5.14963	3.43002e-05	0.000782833	2.13907
BARD1	1.3942	6.81143	5.14939	3.43207e-05	0.000782833	2.13849
MRPL13	2.09865	8.29872	5.14524	3.46697e-05	0.000789034	2.12849
PTGER3	-1.09725	4.69229	-5.14317	3.48454e-05	0.000791273	2.12349
PDIA4	1.36979	8.54357	5.13543	3.5511e-05	0.000803712	2.1048
PPIF	1.34896	7.99873	5.13093	3.59029e-05	0.000811684	2.09396
RPP40	1.69077	8.67015	5.12874	3.60957e-05	0.000814067	2.08867
ZNF280C	1.26928	5.91854	5.11955	3.69156e-05	0.000829994	2.06648
THEM6	1.6817	7.43968	5.11765	3.70871e-05	0.000832019	2.0619
LSM4	1.14791	7.86883	5.11701	3.71453e-05	0.000832412	2.06035
MRPL15	1.77284	9.5032	5.10961	3.78229e-05	0.00084278	2.04249
HIST1H2BD	1.58661	8.33644	5.10515	3.82379e-05	0.000849383	2.03171
SRGAP2	-1.47121	6.26613	-5.10474	3.82762e-05	0.000849383	2.03073
ZDHHC8P1	-1.79081	5.12406	-5.10197	3.85362e-05	0.000854225	2.02404
SLC39A4	2.22685	8.60305	5.09634	3.90702e-05	0.000864191	2.01045
SYT1	-1.01248	4.85006	-5.09366	3.93279e-05	0.000866661	2.00395
BIRC5 /// EPR-1	1.33858	6.80043	5.09341	3.93513e-05	0.000866661	2.00336
C5orf34	1.84503	6.08668	5.09128	3.95571e-05	0.000869954	1.99821
PRKCD	1.5664	6.66495	5.08499	4.01701e-05	0.000879957	1.98303
DAB2	-1.42479	6.24489	-5.07478	4.11866e-05	0.000898377	1.95835
ESPL1	1.35652	7.82975	5.07101	4.15678e-05	0.000904763	1.94925
PPP4C	1.15131	9.07862	5.06973	4.16981e-05	0.000906635	1.94616
HIST1H1C	2.38524	7.76571	5.06474	4.22103e-05	0.000915824	1.9341
PODN	-1.02224	6.09261	-5.06372	4.23159e-05	0.000917143	1.93164
CHEK1	1.14	6.05726	5.05851	4.28594e-05	0.000926958	1.91904
MCM3	1.30704	7.99206	5.05477	4.32533e-05	0.00093252	1.91
OR7E37P	1.62521	8.87323	5.05001	4.37609e-05	0.00094148	1.89848
GRHL1	1.26408	5.89843	5.04879	4.3891e-05	0.000942406	1.89555
SIGLEC16	-1.40479	5.17814	-5.04875	4.3896e-05	0.000942406	1.89544
DNAJB11	1.23808	9.26692	5.04154	4.46775e-05	0.000957174	1.87802
LYPD1	3.78979	9.13975	5.03743	4.51294e-05	0.000965844	1.86808
RTKN	1.12007	5.48363	5.03648	4.52339e-05	0.00096707	1.8658
RBPMS2	-1.16758	6.86615	-5.03385	4.55269e-05	0.000971304	1.85942
JAG2	1.15912	7.76193	5.03215	4.57165e-05	0.000974307	1.85532
GAS2L3	1.52098	6.22068	5.02775	4.62124e-05	0.000981834	1.84467
ZSCAN16	1.42332	7.84593	5.027	4.62972e-05	0.000982614	1.84286
BTG3	1.25872	7.20705	5.02196	4.68718e-05	0.000993283	1.83068
PSD3	-1.95763	6.99001	-5.01828	4.72968e-05	0.000999683	1.82177
HIST1H2AE	1.66017	4.99672	5.00954	4.8321e-05	0.00101817	1.80063
CMTM8	1.90529	7.71953	5.00661	4.86692e-05	0.00102193	1.79354
CCDC80	-2.27354	6.5372	-5.00635	4.86992e-05	0.00102193	1.79293
MFSD3	1.85749	6.61181	5.00098	4.93452e-05	0.00103443	1.77992
RBM6	-1.2127	6.29901	-4.99412	5.01822e-05	0.0010509	1.76332
OXR1	1.08474	7.03113	4.98843	5.08862e-05	0.00106149	1.74958
DNTTIP2	1.23449	9.65703	4.98431	5.14026e-05	0.00106863	1.73961
WNT4	-1.07243	5.84561	-4.98257	5.16234e-05	0.00107016	1.73538
NEURL1B	1.82727	8.60447	4.98028	5.19132e-05	0.00107504	1.72986
LSM5	1.41616	8.0188	4.9766	5.2384e-05	0.0010826	1.72095
ALG10	1.01041	5.42804	4.96786	5.352e-05	0.00109942	1.69978
YARS2	1.10481	7.84558	4.96586	5.37831e-05	0.00110371	1.69494
ZBTB42	1.67125	7.2108	4.96123	5.43974e-05	0.00111516	1.68374
NEU1	1.20407	7.84442	4.96052	5.44919e-05	0.00111516	1.68202
MAOA	-1.78749	6.31643	-4.95969	5.46032e-05	0.00111516	1.68001
CLSTN2	-1.16306	5.43594	-4.9509	5.57928e-05	0.00113165	1.65875
PDZD2	-1.418	5.75903	-4.95079	5.58083e-05	0.00113165	1.65847
EIF4G1	1.22461	7.80842	4.94459	5.66633e-05	0.00114785	1.64347
LGALS8	-1.91705	7.32578	-4.93736	5.76777e-05	0.00116379	1.62597
ARHGEF10	-1.14507	5.70281	-4.93381	5.81835e-05	0.00117169	1.61736
PTH2R	3.74347	7.31163	4.93241	5.83834e-05	0.00117456	1.61397
XK	2.31533	5.08948	4.92303	5.97429e-05	0.00119837	1.59127
RASGEF1A	1.37681	5.15862	4.91892	6.03497e-05	0.00120849	1.5813
PAK1IP1	1.81139	7.62563	4.91881	6.03656e-05	0.00120849	1.58104
PTX3	3.43406	6.74805	4.91414	6.1062e-05	0.00121767	1.56973
BAK1	1.0801	6.87985	4.91327	6.1192e-05	0.00121907	1.56763
NOTCH3	1.07231	6.3316	4.9121	6.13688e-05	0.00122141	1.56479
KCNS3	1.96698	6.54862	4.91149	6.1461e-05	0.00122205	1.5633
KIAA1804	1.66529	8.79865	4.91025	6.16485e-05	0.00122459	1.5603
ZMYND19	1.23243	7.85873	4.90971	6.17297e-05	0.00122501	1.559
NRXN3	-1.47832	6.31868	-4.90927	6.17959e-05	0.00122514	1.55795
ESM1	1.76616	5.156	4.90617	6.22683e-05	0.00123331	1.55044
SMC2	1.4796	7.36157	4.90576	6.23313e-05	0.00123336	1.54944
NCAPD2	1.21609	7.14886	4.90414	6.25809e-05	0.00123711	1.5455
BSPRY	1.18378	6.67665	4.90194	6.29197e-05	0.0012426	1.54017
SLC2A1	1.23124	6.67646	4.89418	6.41304e-05	0.00126286	1.52138
WT1-AS	-1.01877	7.36429	-4.89284	6.43416e-05	0.0012658	1.51814
ALYREF	1.52685	6.77829	4.88717	6.52436e-05	0.00128231	1.50441
RFXANK	1.54739	8.10133	4.88664	6.53291e-05	0.00128276	1.50312
CACYBP	1.06028	8.81616	4.88509	6.5579e-05	0.0012852	1.49935
PRORSD1P	1.57967	6.35139	4.87366	6.74458e-05	0.00131548	1.47168
EIF5B	1.00531	7.22587	4.86974	6.80995e-05	0.00132504	1.46217
PTDSS1	1.35887	10.7208	4.86917	6.81951e-05	0.00132504	1.46079
TIMM8B	1.1293	8.83568	4.86723	6.85218e-05	0.00132887	1.45608
C8orf4	4.2014	6.24755	4.86314	6.92139e-05	0.00133975	1.44617
PIK3R3	1.03508	6.69067	4.86275	6.92797e-05	0.00133976	1.44523
PEA15	1.51477	9.05583	4.86176	6.9449e-05	0.00134176	1.44283
PCOLCE2	-2.66063	5.53032	-4.85664	7.03285e-05	0.00135619	1.43042
SESN1	-1.07379	7.66124	-4.85104	7.13031e-05	0.00137202	1.41685
YRDC	1.16623	7.91716	4.83413	7.43298e-05	0.00141865	1.37588
HYOU1	1.00231	9.21106	4.83227	7.4671e-05	0.00142383	1.37137
HK2	1.22434	5.91197	4.82763	7.55282e-05	0.00143749	1.36012
ZNF300P1	-1.89378	5.83642	-4.82576	7.58766e-05	0.00144278	1.35558
TMEM69	1.11135	10.1656	4.8201	7.69409e-05	0.0014576	1.34186
UGP2	-1.06656	8.68057	-4.81911	7.71288e-05	0.00145981	1.33945
GLT8D2	-1.90325	6.79898	-4.8137	7.81626e-05	0.00147528	1.32633
RNASEH2A	1.79271	7.91289	4.81186	7.85171e-05	0.00148061	1.32187
CCDC167	1.0471	7.97625	4.81019	7.88404e-05	0.00148534	1.31782
MTX2	1.59365	9.10862	4.80759	7.9345e-05	0.00149209	1.31154
LOC100507311	-1.14891	4.60033	-4.80669	7.95205e-05	0.00149402	1.30936
PACSIN3	1.1824	5.89764	4.80454	7.99435e-05	0.00150059	1.30413
MICALL1	1.12935	7.62795	4.803	8.02468e-05	0.0015049	1.3004
CKAP2L	1.0397	7.21254	4.79779	8.12831e-05	0.00152155	1.28776
F11R	1.0165	8.59253	4.79523	8.17968e-05	0.00152976	1.28156
FZD10	3.32677	6.97669	4.79432	8.19795e-05	0.00153178	1.27936
CALD1	-1.21631	6.4637	-4.79283	8.22802e-05	0.001536	1.27575
PPP1R35	1.4975	7.74139	4.79065	8.27232e-05	0.00154219	1.27046
PPP1R16A	1.66249	7.33318	4.78573	8.37311e-05	0.00155457	1.25853
LINC01133	-1.3689	4.84737	-4.78312	8.42701e-05	0.00156033	1.25221
CDC45	1.39497	6.17667	4.77973	8.49767e-05	0.00157054	1.24398
YPEL2	-1.00546	6.79151	-4.77937	8.50517e-05	0.00157054	1.24312
TSPAN4	-1.11077	6.53226	-4.77716	8.55155e-05	0.00157642	1.23776
TSPAN12	1.8178	7.50483	4.77367	8.62548e-05	0.00158703	1.22928
PLAG1	2.41166	7.23207	4.77038	8.69566e-05	0.00159707	1.2213
TMC4	2.02942	9.15064	4.76981	8.7078e-05	0.00159786	1.21992
S100A2	2.51895	7.12405	4.76939	8.7168e-05	0.00159808	1.21891
TLE2	-1.04817	7.38919	-4.76746	8.75824e-05	0.00160424	1.21424
HIST3H2A	1.0185	7.16746	4.76604	8.78888e-05	0.00160569	1.2108
PRIM2	1.18897	5.65791	4.76601	8.78968e-05	0.00160569	1.21071
DLAT	1.39059	7.15912	4.76553	8.79995e-05	0.00160613	1.20956
CASP4	-1.18912	6.01734	-4.75577	9.01411e-05	0.00163501	1.18588
LRP8	1.50773	6.32165	4.75486	9.03428e-05	0.00163576	1.18368
SFN	1.74091	9.2367	4.75226	9.09223e-05	0.00164216	1.17738
SLC25A10	1.38634	6.35899	4.75207	9.09655e-05	0.00164216	1.17691
MCM7	1.61701	8.45846	4.75128	9.11421e-05	0.00164216	1.175
CYC1	1.99233	10.1003	4.74912	9.16283e-05	0.00164738	1.16976
DBF4	1.68412	7.6352	4.74845	9.17806e-05	0.00164867	1.16813
GAS1	-1.26952	7.17001	-4.74767	9.19571e-05	0.00165039	1.16624
TBCCD1	1.27555	7.20939	4.74636	9.2254e-05	0.00165242	1.16306
ZNF492	1.97259	5.06334	4.7461	9.23126e-05	0.00165242	1.16244
PSMD14	1.4865	10.6174	4.74528	9.25001e-05	0.00165428	1.16044
SNRPG	1.2884	11.775	4.74351	9.29049e-05	0.00165867	1.15614
ZSWIM5	-1.08987	5.94221	-4.74218	9.32088e-05	0.00166264	1.15292
CDK2AP1	1.42481	11.6119	4.74143	9.33818e-05	0.00166283	1.1511
CCT2	1.2642	9.55528	4.73891	9.39639e-05	0.00166934	1.14498
SNRPB	1.48184	10.5397	4.73511	9.48465e-05	0.00168305	1.13577
BIK	1.03221	6.93773	4.7342	9.50599e-05	0.00168416	1.13356
HAGLROS	1.08522	6.75714	4.73414	9.50738e-05	0.00168416	1.13342
ASS1	2.26581	11.1313	4.73358	9.52043e-05	0.00168456	1.13206
DUS1L	1.20169	8.58945	4.73334	9.52606e-05	0.00168456	1.13148
SPDL1	1.32074	7.64444	4.7323	9.55043e-05	0.00168658	1.12897
LYAR	1.32536	7.15878	4.73215	9.554e-05	0.00168658	1.1286
TRIM24	1.22493	6.92344	4.72776	9.6579e-05	0.00170345	1.11795
FLRT3	-2.72299	7.54943	-4.72647	9.68867e-05	0.00170594	1.11482
HMGB1	1.098	10.9594	4.72433	9.73988e-05	0.00171348	1.10963
DDIAS	1.16244	6.73152	4.72276	9.77772e-05	0.00171719	1.10581
NRK	-1.38347	4.5846	-4.72163	9.80484e-05	0.001719	1.10309
DDX26B	-1.42969	6.49564	-4.72008	9.84249e-05	0.00172412	1.09931
MTF2	1.0629	7.53672	4.71898	9.86906e-05	0.0017273	1.09666
CPE	-2.51513	8.17928	-4.71689	9.91998e-05	0.00173324	1.09159
USP18	1.99089	7.41561	4.71524	9.96054e-05	0.00173884	1.08758
GTPBP4	1.20259	8.27991	4.71391	9.99323e-05	0.00174307	1.08435
GMNN	1.55668	9.58078	4.70848	0.000101279	0.00175906	1.07117
PPP1CB	1.02173	10.4538	4.70784	0.000101439	0.00176033	1.06962
PNP	1.76322	7.76225	4.70622	0.000101845	0.00176387	1.06569
PROS1	-2.67225	8.64078	-4.70599	0.000101901	0.00176387	1.06515
FRAT2	1.16169	8.18297	4.70532	0.000102071	0.00176532	1.06351
SPATC1L	1.56655	5.25686	4.70293	0.000102672	0.00177129	1.05773
POC1A	1.10521	6.07356	4.70292	0.000102676	0.00177129	1.05769
EMB	-1.18617	5.47383	-4.70135	0.000103074	0.00177666	1.05388
MRGBP	1.08345	7.2944	4.70069	0.00010324	0.00177802	1.0523
LOC101928554	2.71744	6.65482	4.69676	0.000104247	0.00179234	1.04275
COL4A1	1.50898	8.28757	4.69566	0.000104529	0.00179569	1.04009
FCN1	-1.76646	5.11263	-4.69275	0.000105281	0.00180558	1.03303
EFEMP1	-3.06369	6.96472	-4.68747	0.00010666	0.00182463	1.02023
CFD	-1.66367	6.78271	-4.68625	0.000106981	0.0018286	1.01727
NRARP	1.09055	7.81423	4.68587	0.000107081	0.00182873	1.01634
DEPTOR	1.0929	6.90226	4.68395	0.000107591	0.00183442	1.01168
POLR2K	1.3975	9.05766	4.68333	0.000107756	0.0018357	1.01017
PFN1	1.36608	7.52063	4.68146	0.000108254	0.00184265	1.00563
RASSF8-AS1	-1.18678	5.09876	-4.68008	0.000108622	0.00184585	1.00229
L3MBTL3	-1.51734	6.24674	-4.67952	0.000108773	0.00184688	1.00092
CPSF3	1.35754	9.1987	4.67582	0.000109768	0.00185762	0.991958
NUDT11	-1.04356	6.52419	-4.67478	0.00011005	0.00186031	0.989436
PAXIP1-AS1	1.8736	7.54364	4.67376	0.000110327	0.00186245	0.986966
RALA	1.70738	9.86343	4.67196	0.000110817	0.00186764	0.982603
SMARCD2	1.13726	8.84634	4.67003	0.000111347	0.00187206	0.977904
PNPT1	1.4851	9.09566	4.66967	0.000111445	0.00187206	0.977041
RALY	1.38759	8.52006	4.66902	0.000111624	0.00187353	0.975459
METTL21A	1.03355	6.81613	4.66388	0.000113047	0.0018943	0.962999
ZMAT1	-1.50451	5.1348	-4.66152	0.000113707	0.00190225	0.95727
ADPRHL2	1.43048	10.2845	4.65911	0.000114385	0.00191047	0.951421
BICD1	1.78935	7.80364	4.65804	0.000114687	0.00191394	0.94883
PRKAR2B	-2.67489	7.64909	-4.65532	0.00011546	0.00192371	0.942222
ZDHHC23	1.10074	6.86218	4.65422	0.000115772	0.00192733	0.93957
SLC25A27	-1.09455	5.06955	-4.65043	0.000116861	0.0019423	0.930361
AIFM1	1.60038	8.93454	4.63225	0.000122218	0.0020166	0.886272
DNAAF2	1.48593	5.65682	4.63157	0.000122422	0.00201834	0.884628
SFMBT1	1.0502	7.11697	4.63013	0.00012286	0.00202393	0.881117
WDR45B	1.34697	11.5177	4.62826	0.000123427	0.00203	0.876589
LAPTM4B	1.60444	10.4204	4.62777	0.000123576	0.00203082	0.875404
MEF2C	-1.19428	6.65177	-4.62619	0.000124058	0.00203502	0.871575
SPRYD4	1.05794	7.38008	4.62596	0.00012413	0.00203502	0.871004
PAPLN	-1.12451	5.4946	-4.6208	0.000125719	0.00205941	0.858498
UGT2B28	1.67976	7.37897	4.62033	0.000125865	0.00206015	0.857359
VLDLR	-1.92343	7.38197	-4.6118	0.000128541	0.00209225	0.836665
RRP9	1.02239	6.75784	4.61147	0.000128645	0.00209227	0.835872
RNASEH1-AS1	1.43566	6.23346	4.61056	0.000128935	0.00209439	0.833656
CYP3A5	-1.19377	5.15643	-4.60931	0.000129335	0.00209682	0.830617
TMEM98	-2.12453	8.70392	-4.60706	0.000130053	0.00210513	0.825171
PBX3	-1.8434	7.60664	-4.60417	0.000130984	0.00211184	0.818158
GRPEL1	1.23144	8.57846	4.60259	0.000131497	0.00211845	0.814314
N4BP2L2	-1.02605	6.83576	-4.60224	0.000131609	0.00211858	0.813478
C1S	-1.94554	7.30752	-4.60111	0.000131977	0.00212117	0.810732
LRRC8E	1.06101	5.62498	4.59733	0.000133215	0.0021377	0.801556
GTF2IRD1	1.43984	8.07534	4.59605	0.000133635	0.00214182	0.79846
NDUFA9	1.20612	9.8152	4.59591	0.000133681	0.00214182	0.798123
GOLT1B	1.08961	8.8004	4.59534	0.000133869	0.00214191	0.796741
CAV1	-2.8922	8.51997	-4.59493	0.000134005	0.00214198	0.795743
OTUD6B	1.31037	8.56791	4.59331	0.000134543	0.00214555	0.791804
MTFR2	1.07951	5.26998	4.59189	0.000135015	0.00214974	0.788355
DNMT1	1.67215	8.39567	4.59111	0.000135276	0.00215221	0.786462
PRSS21	2.08134	7.11481	4.59056	0.000135457	0.00215341	0.785149
TRMT10C	1.2393	9.58061	4.58751	0.000136483	0.00216636	0.777731
ZNF623	1.11121	8.62177	4.58446	0.000137511	0.00218099	0.770353
PTRF	-1.1024	7.10776	-4.58269	0.000138115	0.00218719	0.766041
DPYS	-1.51772	4.55126	-4.57864	0.000139503	0.00220404	0.756217
DKFZP586I1420	-1.1668	7.74231	-4.57822	0.000139647	0.00220461	0.755205
SNRPF	1.05221	8.58513	4.57654	0.000140227	0.00221205	0.751131
PKHD1L1	-3.19847	6.13917	-4.57602	0.000140406	0.00221317	0.749877
BAIAP2L1	1.26182	7.96247	4.56972	0.000142605	0.00224094	0.734598
CWC22	1.11593	7.76842	4.56763	0.000143343	0.00225034	0.729525
MAN1C1	-1.16751	6.77312	-4.55638	0.000147381	0.00230361	0.702226
HSP90AA1	1.25393	12.2645	4.55344	0.000148453	0.00231682	0.695106
SLMO2	1.0687	8.38103	4.55173	0.000149082	0.00231781	0.690951
NR2F1	-3.26194	6.64009	-4.54638	0.000151064	0.00234326	0.677978
MND1	1.7004	4.97562	4.54281	0.000152399	0.00236218	0.669332
ALDH1A3	-1.2684	6.09105	-4.54162	0.000152848	0.00236501	0.666444
TUBA4A	2.06065	8.8271	4.54145	0.000152913	0.00236501	0.666025
P2RX7	-1.10956	5.84871	-4.54097	0.000153092	0.00236501	0.664876
CDYL	1.00302	7.71346	4.54084	0.000153141	0.00236501	0.664558
MPLKIP	1.2631	8.18846	4.53989	0.000153501	0.00236672	0.662251
TPD52	1.43517	7.8329	4.53845	0.000154048	0.00237248	0.658761
TRA2A	-1.0444	6.25628	-4.53611	0.000154943	0.00238355	0.65307
PDP1	1.49256	8.11995	4.53276	0.000156226	0.00239292	0.644967
MOGS	1.30875	7.22973	4.52729	0.000158353	0.00241462	0.631681
RUFY3	-1.02635	6.22673	-4.52037	0.000161081	0.00244308	0.614906
TUBB3	1.32202	9.33047	4.51492	0.000163263	0.00247068	0.601693
ZBTB20	-1.34105	6.75514	-4.51382	0.000163707	0.00247557	0.599024
ILF2	1.28838	9.68065	4.51272	0.000164153	0.00248047	0.596355
RB1CC1	1.32675	8.79099	4.51141	0.000164681	0.00248663	0.593196
MRPS17	1.44509	8.45605	4.51018	0.000165185	0.00248873	0.590195
SNAI2	-2.29768	6.84143	-4.50949	0.000165467	0.0024893	0.588523
CFI	-2.24208	8.46057	-4.50559	0.000167067	0.00250968	0.579074
HIST2H2BE	1.68011	7.49212	4.50367	0.00016786	0.00251974	0.574423
HK1	1.30277	9.72742	4.50277	0.000168236	0.00252294	0.572227
SEMA3C	-1.65199	6.773	-4.49562	0.000171231	0.00255722	0.554898
SHCBP1	1.94809	5.20622	4.49296	0.000172357	0.00257172	0.548462
HAUS8	1.04975	6.31152	4.49274	0.000172454	0.00257172	0.547912
RASSF10	3.32373	6.69904	4.49006	0.000173595	0.0025831	0.541433
POR	1.75859	7.0197	4.48862	0.000174214	0.00259042	0.53794
ANLN	1.63021	7.39681	4.48743	0.000174729	0.00259619	0.535043
EMP3	-2.08044	6.86214	-4.48256	0.000176842	0.00262378	0.52324
C11orf83	1.78694	8.1324	4.48141	0.000177343	0.0026293	0.520465
LPCAT1	1.13232	7.99824	4.48033	0.000177819	0.00263446	0.517831
VOPP1	1.23174	9.79878	4.47602	0.00017972	0.00265684	0.507395
LOC101060264	1.35163	4.53009	4.47561	0.000179904	0.00265764	0.50639
IPO4	1.17323	8.16182	4.47212	0.000181459	0.00267675	0.497941
TRAPPC3	1.02857	8.87604	4.47156	0.00018171	0.00267852	0.496586
GNPNAT1	1.56459	8.64128	4.47006	0.000182387	0.00268299	0.492932
WASF3	-1.94393	7.43134	-4.46933	0.000182714	0.00268322	0.491175
JUP	1.7199	8.94165	4.46911	0.000182816	0.00268322	0.490629
AGO2	1.4863	6.33061	4.46609	0.000184185	0.00269944	0.483307
AGPAT2	1.14808	7.07151	4.46359	0.000185322	0.00271028	0.477265
LXN	-2.73854	8.2449	-4.46322	0.000185492	0.00271055	0.476365
C1orf109	1.2598	7.54895	4.46046	0.000186762	0.00272162	0.469669
NAP1L2	-2.07763	6.46178	-4.45952	0.000187193	0.00272596	0.467405
CENPQ	1.24478	6.68211	4.45764	0.000188068	0.00273674	0.462831
SELL	-1.50764	6.00103	-4.44943	0.000191917	0.00278648	0.442949
PRAME	2.84452	7.73951	4.44237	0.000195294	0.00282583	0.42583
MYCL	1.67957	7.04452	4.44054	0.00019618	0.00283264	0.42139
FAM150B	-2.72185	5.86149	-4.43777	0.000197524	0.00285002	0.414693
SMIM22	1.16907	6.88336	4.43344	0.000199651	0.00287059	0.404184
FAM198B	-1.0777	5.81919	-4.43256	0.000200081	0.00287476	0.402073
TSTA3	1.63487	8.63726	4.43067	0.000201018	0.00288417	0.397488
FIBP	1.13649	8.83572	4.42919	0.000201753	0.00289118	0.393907
PON3	-1.34066	5.00536	-4.4266	0.000203051	0.00289827	0.387616
SMOC2	-1.35553	6.72828	-4.41969	0.000206545	0.00293671	0.370879
SPAG5	1.29073	6.90612	4.41573	0.000208576	0.00296352	0.361281
OXLD1	1.31805	8.13449	4.41076	0.000211152	0.00298561	0.349241
PUS1	1.42977	7.49377	4.40691	0.000213167	0.00300785	0.33993
MRPS35	1.36971	9.66425	4.39868	0.000217546	0.00306542	0.319986
AHCY	1.81387	9.7631	4.39784	0.000217996	0.00306965	0.31796
GLDC	2.25707	7.34251	4.39426	0.000219936	0.00309157	0.309275
HES6	1.28788	7.51941	4.39413	0.000220006	0.00309157	0.308959
TPBG	-1.90594	7.42869	-4.38934	0.00022262	0.00311759	0.297381
RARRES1	-3.33976	7.18452	-4.38801	0.000223352	0.00312571	0.294159
SLC35A3	1.0339	7.14753	4.3864	0.000224245	0.00313391	0.290249
S100A14	1.83864	8.10242	4.38207	0.000226655	0.00315466	0.279769
AZIN1	1.37939	9.87069	4.37965	0.000228015	0.00316928	0.273904
DPM1	1.15025	11.3437	4.37649	0.000229802	0.00319196	0.266248
BEND3	1.01603	7.76004	4.37433	0.000231032	0.00320474	0.261016
DEFB1	3.1715	7.36879	4.37432	0.000231036	0.00320474	0.260999
ANKRD65	1.41458	6.53922	4.37179	0.000232484	0.00321851	0.254875
HTRA1	-2.37458	10.0623	-4.37005	0.000233487	0.00322998	0.250655
PRCC	1.17666	6.00052	4.36736	0.000235041	0.00324929	0.244151
NCBP2-AS2	1.40558	8.65797	4.36582	0.000235937	0.00325622	0.240423
NME1	1.53837	10.2823	4.36568	0.00023602	0.00325622	0.240077
SLC25A32	1.55274	8.0402	4.36379	0.000237125	0.00326557	0.2355
TNNI3	1.0252	5.52029	4.3637	0.000237177	0.00326557	0.235286
NXN	1.58471	10.3808	4.36308	0.00023754	0.00326617	0.233787
GFPT1	1.08238	7.79832	4.36067	0.000238955	0.00328122	0.227965
MTCH1	1.08612	11.8369	4.3595	0.000239652	0.0032832	0.225113
SPP1	1.44052	7.0724	4.35835	0.00024033	0.00328686	0.222344
GOT1	1.03681	7.76847	4.35687	0.000241211	0.00329671	0.218757
IL4I1	2.05817	6.90436	4.35222	0.000243996	0.00332811	0.207505
BBS4	-1.1353	7.01499	-4.34951	0.000245635	0.003346	0.200945
STARD7	1.19268	11.1031	4.34904	0.000245919	0.00334764	0.199814
USMG5	1.20495	12.4797	4.34509	0.000248331	0.00337599	0.190247
MARVELD2	1.32316	7.28158	4.33806	0.000252678	0.00342595	0.173245
PSMD2	1.46586	10.8066	4.333	0.000255861	0.0034603	0.160981
AQP9	-2.67678	8.02846	-4.33242	0.000256225	0.0034603	0.159589
COX6C	1.24496	11.6357	4.33161	0.000256738	0.00346088	0.157627
ATP6V1B1	1.05504	5.41148	4.33155	0.000256775	0.00346088	0.157486
PCSK5	-1.54334	5.59433	-4.33114	0.000257038	0.00346139	0.156484
KLF4	-1.33568	6.56919	-4.33078	0.000257265	0.00346139	0.155618
GOLPH3	1.38856	10.3923	4.33069	0.00025732	0.00346139	0.155408
ALKBH2	1.29177	7.45531	4.33	0.000257759	0.00346501	0.153739
TOMM5	1.21459	9.84199	4.32824	0.000258886	0.00347788	0.149465
YWHAZ	1.07969	10.0389	4.32354	0.000261903	0.00350983	0.138115
SPATA17	1.32433	5.28446	4.32086	0.000263647	0.00352563	0.131614
NPHS2	-1.01501	6.37658	-4.31806	0.000265476	0.00354315	0.124842
TRIAP1	1.19961	9.69309	4.31293	0.000268862	0.003579	0.112429
HIF1A	1.06696	12.026	4.31236	0.000269237	0.00358166	0.111063
C5orf30	1.54139	7.2931	4.31138	0.000269889	0.003588	0.108694
CCDC84	-1.30725	8.48415	-4.31008	0.000270759	0.00359722	0.105545
CXCR4	2.20539	9.17957	4.30978	0.00027096	0.00359756	0.104816
CDH6	1.70013	6.76033	4.30898	0.000271495	0.00360232	0.102886
TNFSF13B	-2.26152	7.64279	-4.30677	0.00027298	0.00361734	0.097541
SEMA5A	-1.64489	6.93312	-4.3057	0.0002737	0.00362453	0.0949624
CBLN4	-1.22361	5.23289	-4.30463	0.000274427	0.0036317	0.0923653
RPAP3	1.09204	5.42888	4.30341	0.000275254	0.0036357	0.0894172
ZBTB10	1.22142	6.67832	4.29782	0.000279079	0.00367783	0.0759059
SPIN4	1.61519	8.7667	4.29744	0.000279342	0.00367783	0.0749804
LOC100190986	-1.06262	5.348	-4.29678	0.000279802	0.00368151	0.0733716
POP7	1.64191	8.52708	4.29636	0.000280092	0.00368296	0.0723559
TSC1	-1.08147	7.66587	-4.29522	0.000280879	0.00368856	0.0696096
MGME1	1.60847	8.97758	4.29339	0.000282154	0.00369582	0.0651756
SS18L1	1.15098	8.32272	4.29199	0.00028313	0.00370156	0.0617939
VIM	-1.29046	7.58117	-4.28896	0.000285257	0.00372454	0.0544657
KRTCAP3	1.82942	8.16226	4.28831	0.000285712	0.0037281	0.0529057
MEIS2	-2.92649	8.10836	-4.28739	0.000286362	0.0037342	0.0506813
AKAP11	-1.23498	6.77741	-4.27737	0.000293539	0.00381079	0.0264483
RAB31	-1.71224	8.1655	-4.27423	0.000295821	0.00383798	0.0188675
LOC101926907	1.16181	5.93501	4.27276	0.000296897	0.00384372	0.0153119
FAM69A	-1.03075	5.80923	-4.2726	0.000297011	0.00384372	0.0149376
GUCY1B3	1.44959	6.7914	4.2726	0.000297015	0.00384372	0.0149239
WNT5A	-2.39924	8.17076	-4.27108	0.00029813	0.00385571	0.011257
NPM3	1.00504	7.1744	4.26936	0.000299401	0.0038685	0.00709147
TTC30B	1.4328	6.28762	4.26846	0.000300064	0.00387094	0.00492862
PPID	1.04023	7.88266	4.26645	0.000301559	0.00388778	6.29426e-05
PDCD10	1.45861	10.9361	4.2646	0.000302938	0.00389986	-0.0044025
DHFR	1.30123	7.45941	4.26443	0.000303068	0.00389986	-0.00482286
NCK1-AS1	1.24588	6.98139	4.26171	0.000305111	0.00391383	-0.0113955
HIST1H2AC	1.70095	9.59247	4.26044	0.000306067	0.00392364	-0.0144587
PHACTR2	-1.20315	6.50961	-4.25973	0.000306606	0.00392563	-0.0161802
TDRD6	-1.58251	5.14753	-4.25734	0.00030842	0.00394145	-0.021952
TPD52L2	1.34428	9.28485	4.25549	0.000309832	0.00395456	-0.026422
NT5E	-1.57815	5.71527	-4.24903	0.00031481	0.00400063	-0.0420207
PCBD1	1.17712	8.06355	4.24609	0.000317103	0.00402228	-0.0491211
METTL25	-1.21862	8.31169	-4.24554	0.000317537	0.00402529	-0.0504593
SLC25A11	1.0332	7.78637	4.24254	0.000319899	0.00405271	-0.0577082
DISP1	-1.51944	6.3225	-4.24194	0.00032037	0.00405617	-0.0591483
NDN	-2.25448	8.44751	-4.24056	0.000321462	0.00406748	-0.062478
AHSA2	-1.00997	6.70908	-4.2402	0.000321746	0.00406856	-0.0633427
PDRG1	1.02319	8.7808	4.23982	0.000322053	0.00406993	-0.0642763
UGT8	1.58326	5.45311	4.23793	0.000323557	0.00408152	-0.0688345
ASUN	1.39358	10.0986	4.23614	0.00032499	0.0040959	-0.0731576
SLC39A7	1.20424	6.96466	4.23163	0.00032863	0.00412755	-0.084052
PPA1	1.21571	12.1053	4.22692	0.000332472	0.00417323	-0.0954197
FAM32A	1.06849	9.61953	4.22503	0.000334028	0.00418763	-0.0999887
SMAD9	-1.07426	5.85069	-4.22167	0.00033681	0.0042086	-0.108099
NTNG1	-1.13943	5.37364	-4.21503	0.000342375	0.00425577	-0.124128
UBR5	1.05347	8.81942	4.20906	0.000347458	0.00431633	-0.138538
GATA6-AS1	-1.97829	7.31551	-4.20723	0.000349026	0.00433055	-0.142941
POU2F3	1.27056	4.38829	4.20284	0.00035283	0.00436451	-0.15354
NAA38	1.65332	8.96342	4.20091	0.000354513	0.00438003	-0.158192
SLC4A11	1.53123	6.55446	4.19695	0.000357998	0.00441776	-0.167757
CLMN	1.14001	6.4972	4.19428	0.000360368	0.0044404	-0.174208
NPY	-1.00834	5.84495	-4.18773	0.000366236	0.00449354	-0.189996
INPPL1	1.03358	8.02939	4.18659	0.000367272	0.00450233	-0.192759
MRPL36	1.37321	9.27957	4.18258	0.000370919	0.00453888	-0.202417
ARL4C	1.2523	8.05225	4.18217	0.000371298	0.0045408	-0.203415
LOC100272216	-1.69386	7.08744	-4.18025	0.000373063	0.00455881	-0.208049
MANSC1	1.23858	8.79348	4.18008	0.000373216	0.00455881	-0.208451
LACTB2	1.62123	7.92143	4.17836	0.000374806	0.00457214	-0.212606
DEK	1.18908	11.5664	4.17817	0.000374978	0.00457214	-0.213053
DGAT1	1.57479	7.21182	4.17732	0.00037577	0.00457907	-0.215116
SYT11	1.16455	5.98304	4.17666	0.000376377	0.00458373	-0.216692
MEA1	1.36756	9.97783	4.17579	0.000377188	0.00459088	-0.218797
OCIAD2	1.52316	9.89591	4.17486	0.000378056	0.00459686	-0.221043
SPARCL1	-2.09872	9.34501	-4.17157	0.000381139	0.00462795	-0.22898
HSPA4	1.05787	7.52709	4.16921	0.000383356	0.00464936	-0.234649
PALM3	1.49111	6.35099	4.16728	0.000385191	0.00466884	-0.239314
SRP19	1.19105	9.46913	4.16649	0.000385947	0.00467523	-0.241229
ENDOG	1.65416	7.14786	4.16445	0.00038789	0.004696	-0.246138
CEP76	1.46846	6.99462	4.16369	0.000388618	0.00470203	-0.24797
LURAP1L	-1.13669	6.0218	-4.16274	0.000389528	0.00471025	-0.250254
PARP1	1.15317	8.43093	4.1559	0.00039616	0.00477915	-0.26675
SLC39A11	1.05668	7.90261	4.15436	0.000397665	0.00479165	-0.270454
TUBB4B	1.39966	10.3954	4.15412	0.000397899	0.00479165	-0.271028
C2orf47	1.16977	9.10784	4.15314	0.000398862	0.0047976	-0.273391
PLCXD3	-1.22225	4.90906	-4.15282	0.000399176	0.00479855	-0.274158
CHAC2	1.48414	5.86043	4.15206	0.000399929	0.00480286	-0.275999
CASP1	-1.39716	6.5352	-4.15198	0.000400004	0.00480286	-0.276183
SKAP1	1.12328	6.52675	4.14686	0.000405089	0.00484362	-0.288523
CEBPG	1.73481	7.36768	4.1453	0.000406649	0.0048485	-0.292277
AP1M2	1.25783	8.16973	4.13913	0.000412887	0.00490859	-0.307148
CXCL6	-2.28255	5.17833	-4.13729	0.000414769	0.00491952	-0.311588
BORA	1.11963	6.50882	4.13613	0.000415959	0.00493078	-0.314387
C14orf2	1.18794	10.5063	4.13452	0.000417613	0.0049418	-0.318264
PXDN	1.80983	9.49985	4.13056	0.00042171	0.00498163	-0.327796
EFCAB4A	1.00615	5.68683	4.12541	0.000427097	0.00503069	-0.340193
RASSF3	-1.08169	6.61067	-4.12492	0.000427615	0.00503105	-0.341375
EXOSC4	1.2861	8.16012	4.12347	0.000429151	0.00504043	-0.344877
MYBL2	1.04366	6.96568	4.11091	0.000442651	0.00517818	-0.375115
USP1	1.13569	9.25107	4.10869	0.000445073	0.00519463	-0.380442
LINC01116	-2.82273	7.28337	-4.10757	0.000446306	0.00519717	-0.383143
LYVE1	-1.69146	4.52713	-4.1041	0.000450145	0.00523184	-0.391504
VNN2	-1.07627	5.83614	-4.10397	0.000450289	0.00523184	-0.391816
SYNC	-1.37407	5.01506	-4.10395	0.000450306	0.00523184	-0.391854
KCNJ2	-1.64324	7.47191	-4.10303	0.000451324	0.00524068	-0.394056
ZCCHC24	-1.56502	7.52781	-4.10133	0.000453222	0.00525213	-0.398154
GPR19	1.01174	6.06547	4.10106	0.000453523	0.00525213	-0.398802
MTERF3	1.24672	8.98722	4.10042	0.000454239	0.00525664	-0.400341
ABCA5	-1.02299	4.69847	-4.09786	0.000457114	0.00528094	-0.406499
NAP1L5	-1.71665	6.03837	-4.09569	0.000459568	0.00529143	-0.411724
SATB1	-1.04689	5.29391	-4.09569	0.000459573	0.00529143	-0.411735
FGF1	-1.08229	5.51287	-4.09221	0.000463526	0.00533094	-0.420093
COX5B	1.12022	9.67074	4.08714	0.000469361	0.00539198	-0.432301
FNBP1L	1.39336	10.6185	4.08429	0.000472671	0.00542696	-0.439158
CD82	1.01544	6.96341	4.08125	0.000476216	0.0054646	-0.446448
SRD5A3	1.44064	6.21003	4.08037	0.00047726	0.00547351	-0.448586
ST6GALNAC2	1.81367	7.129	4.07929	0.00047853	0.00548193	-0.451178
SAT2	-1.44303	8.65293	-4.07856	0.000479386	0.00548559	-0.452922
CERK	-1.38563	9.30228	-4.07588	0.000482571	0.00551279	-0.459382
ARMCX1	-1.93029	9.12626	-4.07519	0.000483391	0.00551599	-0.461038
C10orf54	-1.21842	6.50785	-4.07392	0.000484903	0.00552709	-0.464086
SLC34A2	2.20475	9.25396	4.06987	0.000489768	0.00557013	-0.473825
BRCC3	1.12807	6.1977	4.06733	0.000492843	0.00558956	-0.479929
TMEM200B	-1.11203	5.87772	-4.06459	0.000496182	0.00561808	-0.486515
SDHA	1.06159	10.0846	4.06287	0.000498287	0.0056388	-0.490644
C10orf2	1.01596	7.54011	4.0599	0.000501952	0.00566773	-0.497792
ACPP	-1.2719	5.49406	-4.05602	0.000506766	0.00571263	-0.507101
C1QBP	1.36808	10.008	4.05563	0.00050726	0.00571506	-0.508052
MRPL51	1.02403	10.3705	4.05328	0.0005102	0.00573555	-0.513689
PPP1R14C	1.84003	7.61542	4.05128	0.000512716	0.00575527	-0.518484
LSM2	1.49252	7.82227	4.05122	0.000512799	0.00575527	-0.518642
LOC728061	-1.89234	6.77811	-4.04937	0.000515136	0.00577414	-0.523077
CENPM	1.26491	6.7425	4.04898	0.000515629	0.00577437	-0.52401
CPVL	-1.82884	8.86954	-4.04794	0.000516949	0.00578598	-0.526502
LOC728392	-1.73794	7.39461	-4.04731	0.000517754	0.00579182	-0.528019
STON2	1.31051	6.01299	4.04402	0.000521965	0.00583082	-0.535918
SKA2	1.17139	8.31402	4.0415	0.000525216	0.00585608	-0.541972
KNTC1	1.18449	6.16184	4.04074	0.000526203	0.00585751	-0.543802
NHP2	1.25232	11.2415	4.03977	0.000527459	0.00586512	-0.546127
AASS	-1.31249	4.5378	-4.03331	0.000535924	0.00593666	-0.561649
MCM5	1.20575	7.38195	4.03283	0.000536555	0.00594043	-0.562796
NCR3LG1 /// RP1-239B22.5	-1.22499	5.17163	-4.03145	0.000538386	0.00595279	-0.566117
GPR39	1.0183	5.38196	4.03133	0.000538544	0.00595279	-0.566403
SNRPD1	1.27677	8.20192	4.02229	0.000550661	0.00604752	-0.58809
ECHDC2	-1.18723	8.03605	-4.02041	0.000553219	0.00606584	-0.592607
FGF9	-2.60068	5.80968	-4.01825	0.000556175	0.00609173	-0.597801
C17orf96	1.22147	6.74098	4.01473	0.000561016	0.00613817	-0.606246
C3orf67	1.39014	5.52857	4.01257	0.000563999	0.00616751	-0.611413
UFSP2	-1.36335	8.18679	-4.00384	0.000576245	0.00626793	-0.632344
GRAMD2	1.29483	7.6106	3.99609	0.000587344	0.00637171	-0.650929
DSP	1.50932	11.7451	3.99464	0.000589444	0.00638801	-0.654407
TPRKB	1.27315	9.04992	3.9946	0.000589504	0.00638801	-0.654505
STRA13	1.07375	8.71097	3.99377	0.000590713	0.00639132	-0.656501
COA6	1.33053	8.90438	3.99252	0.000592528	0.00640418	-0.659489
NTHL1	1.54125	6.53784	3.98666	0.000601135	0.00648693	-0.673536
SLFN13	1.05544	4.84601	3.98413	0.000604885	0.00652052	-0.679593
MST4	-1.47223	6.72659	-3.98207	0.000607967	0.00655029	-0.684542
PSENEN	1.19446	8.22878	3.97905	0.000612503	0.00658569	-0.691782
CRIM1	-1.61654	9.69501	-3.97683	0.000615854	0.00661437	-0.697095
EBAG9	1.17048	9.50589	3.97563	0.000617672	0.00663042	-0.699965
IMP4	1.06444	8.30443	3.97435	0.000619627	0.00664443	-0.703042
TCTEX1D2	1.16202	8.8997	3.97238	0.000622625	0.00666959	-0.707742
MRPL1	1.12193	8.40407	3.96884	0.000628069	0.00671735	-0.716218
HEG1	-1.72668	8.84756	-3.96585	0.000632709	0.00675638	-0.723384
POLD1	1.09794	6.54206	3.96406	0.000635496	0.00677553	-0.727663
NELFCD	1.16568	8.98119	3.96323	0.000636807	0.00678244	-0.729669
ABCB1	-1.23821	4.5645	-3.95836	0.000644474	0.00683948	-0.74132
CHTF18	1.22578	6.11427	3.95803	0.000644994	0.00683948	-0.742105
H2AFZ	1.03942	11.3023	3.95311	0.000652842	0.00691006	-0.753877
PABPC3	1.05406	12.3906	3.95267	0.000653549	0.00691396	-0.75493
NUDT19	1.5812	8.5885	3.95037	0.000657262	0.00694607	-0.760444
POLR1C	1.10093	8.42423	3.94983	0.000658131	0.00694807	-0.76173
C4orf46	1.11792	6.88857	3.94887	0.000659695	0.00695741	-0.764041
NXT1	1.21036	9.03891	3.94503	0.000665946	0.00700167	-0.773218
KLF5	1.16905	9.0939	3.93994	0.000674338	0.00707173	-0.785404
FILIP1L	-1.02211	6.25605	-3.93936	0.00067529	0.00707809	-0.786777
TRPC1	-1.48638	6.14997	-3.93824	0.000677151	0.00709033	-0.789455
SYTL1	1.48646	6.9689	3.9372	0.000678896	0.00710496	-0.791959
DHRS11	1.27781	6.94268	3.93468	0.00068311	0.00713839	-0.79798
TXNIP	-1.72161	9.74918	-3.9323	0.000687122	0.00716175	-0.803678
RIOK1	1.25529	8.051	3.93089	0.000689494	0.00718281	-0.80703
RGS1	1.78475	5.90865	3.92988	0.000691217	0.00719344	-0.809459
KDF1	1.0121	6.35421	3.92958	0.000691719	0.007195	-0.810165
JUN	1.13786	8.59265	3.9291	0.000692535	0.00719983	-0.811311
CCT6A	1.19336	10.1898	3.92628	0.000697357	0.0072255	-0.818061
ELOVL6	1.43741	6.66554	3.92624	0.000697431	0.0072255	-0.818165
SPATA7	-1.0155	6.23595	-3.92586	0.00069807	0.007228	-0.819056
LOC728819	1.38733	6.16213	3.92474	0.000700006	0.00724438	-0.82175
PCDH7	1.42242	5.70297	3.91905	0.000709861	0.0073131	-0.835348
PPP1R14B	1.41063	7.91387	3.91904	0.000709864	0.0073131	-0.835352
ZNF639	1.09211	7.93964	3.91708	0.000713292	0.00734472	-0.840038
ETS2	-1.00367	6.12017	-3.91635	0.000714571	0.00735176	-0.841781
COX7A2	1.13311	12.1919	3.91611	0.000714991	0.00735176	-0.842352
ARL5B	1.05145	7.2096	3.91403	0.000718654	0.00738507	-0.847322
CPQ	-1.05482	6.92471	-3.91323	0.000720084	0.00739424	-0.849255
DHCR24	1.75867	10.4737	3.91292	0.000720631	0.00739424	-0.849994
TSSC1	1.11505	7.58877	3.91116	0.000723753	0.00741565	-0.854198
PAPD4	-1.24635	6.33432	-3.91081	0.000724373	0.00741565	-0.855031
NFKBIZ	-1.73727	8.70685	-3.91072	0.00072453	0.00741565	-0.855241
DPYD	-1.15957	5.57135	-3.9083	0.000728858	0.00744877	-0.861033
TMEM220	-1.01476	6.50813	-3.90671	0.000731705	0.0074704	-0.864823
DPM3	1.38333	9.14299	3.90265	0.000739026	0.00753011	-0.874504
EPHB6	-1.21214	6.71174	-3.90233	0.000739608	0.0075323	-0.87527
MIRLET7D	-1.06257	7.07461	-3.89346	0.000755909	0.00766244	-0.896464
HOXB7	1.46153	7.85395	3.89268	0.000757355	0.00767103	-0.898322
MAL	3.39625	8.46867	3.88922	0.00076381	0.00771828	-0.906573
YWHAQ	1.03632	11.9373	3.88917	0.000763906	0.00771828	-0.906695
ZNF217	1.30259	10.072	3.88794	0.000766218	0.00773782	-0.909632
GGH	1.8452	8.70513	3.88592	0.000770031	0.00776309	-0.914457
ZGPAT	1.08554	7.18189	3.88561	0.000770618	0.00776309	-0.915197
NEK5	-1.22628	5.32404	-3.88529	0.000771225	0.00776523	-0.915962
TMA7	1.1665	12.7304	3.88496	0.000771833	0.00776523	-0.916728
GLIPR1	-1.10662	5.90276	-3.88301	0.000775539	0.00778583	-0.921384
CHCHD7	1.10052	8.64232	3.88226	0.000776974	0.00779259	-0.92318
ABI3BP	-1.60426	4.59193	-3.8787	0.000783796	0.0078361	-0.931676
PLSCR4	-2.22133	9.38531	-3.87647	0.000788099	0.00786397	-0.936998
MALAT1	-1.55939	8.514	-3.87639	0.000788252	0.00786397	-0.937185
FBXO45	1.14214	7.03511	3.87635	0.000788319	0.00786397	-0.937268
BST1	-1.00781	6.46355	-3.87586	0.000789275	0.00786584	-0.938446
H2BFS	1.46952	7.30769	3.87417	0.000792555	0.007887	-0.942476
FAM107A	1.01015	7.29592	3.87334	0.000794166	0.00789535	-0.944449
FARSA	1.14519	7.45211	3.87144	0.000797878	0.0079284	-0.94898
LAMC1	1.29916	10.2383	3.87029	0.000800143	0.00794367	-0.951734
SPSB2	1.23103	6.59922	3.86812	0.0008044	0.00797385	-0.956891
SYNE4	1.28249	7.65855	3.86347	0.000813646	0.00803441	-0.967994
FZD5	1.31182	7.27058	3.86224	0.000816094	0.00805076	-0.970912
CCDC58	1.07081	6.02423	3.86143	0.000817715	0.00805898	-0.97284
LINC00888	1.31922	6.25012	3.85867	0.000823277	0.00810599	-0.979425
BYSL	1.40579	7.67468	3.85833	0.00082396	0.0081064	-0.98023
PKN1	1.35973	7.07144	3.8533	0.000834197	0.0081938	-0.992225
LINGO1	1.21993	5.6787	3.85019	0.000840572	0.00824059	-0.999618
IL1RAP	1.53344	7.35203	3.84981	0.000841364	0.0082444	-1.00053
GNAI1	-2.31743	7.19134	-3.84836	0.000844369	0.00826989	-1.004
EPB41L3	-1.60238	5.36853	-3.84607	0.000849124	0.00830657	-1.00945
ABCE1	1.05397	8.78974	3.84434	0.000852737	0.0083319	-1.01357
NDUFAB1	1.14513	11.2234	3.84289	0.000855755	0.00835639	-1.017
NCBP2	1.32337	8.66523	3.84275	0.000856061	0.00835639	-1.01735
KLHDC9	1.23001	9.25192	3.84241	0.000856781	0.00835944	-1.01817
MAMDC2	-1.763	4.92269	-3.84093	0.000859885	0.00838172	-1.02168
RCN1	1.22231	10.0601	3.84012	0.000861604	0.0083865	-1.02362
F13A1	-1.24681	6.92849	-3.83987	0.00086212	0.00838668	-1.0242
SBK1	1.05436	7.23142	3.83972	0.000862442	0.00838668	-1.02456
ARRDC4	-2.38911	7.48533	-3.8392	0.000863537	0.00839051	-1.02579
ACOT8	1.07307	6.88503	3.83562	0.000871161	0.00845253	-1.03433
ERO1L	1.10208	8.13831	3.83556	0.00087128	0.00845253	-1.03446
CMSS1	1.31344	8.40546	3.83402	0.000874578	0.00847898	-1.03813
CYP39A1	-1.54492	5.96358	-3.8339	0.000874836	0.00847898	-1.03841
ORC4	1.04954	7.37426	3.82712	0.000889494	0.00859221	-1.05455
C8orf82	1.73341	7.82572	3.82123	0.000902418	0.00869636	-1.06855
CLEC10A	-1.02145	5.1118	-3.81791	0.000909789	0.00875142	-1.07644
SNHG17	1.23209	8.48613	3.8109	0.000925561	0.00887809	-1.09312
FLJ41455	1.71658	4.21568	3.8105	0.000926473	0.00887852	-1.09408
LBR	1.05877	9.7053	3.80776	0.000932695	0.0089256	-1.10057
PSMA4	1.11946	11.0979	3.80288	0.000943932	0.00901206	-1.11219
NDUFA12	1.12087	11.5567	3.80251	0.000944778	0.00901593	-1.11306
ALAS1	1.06868	8.58915	3.80136	0.000947451	0.0090204	-1.1158
WDR34	1.09838	8.84425	3.79836	0.000954423	0.00908255	-1.12291
AHNAK2	1.27318	6.59792	3.79531	0.000961583	0.00913281	-1.13017
SLFN11	-1.21805	7.09497	-3.79392	0.000964862	0.00915101	-1.13347
FAM13C	-1.35741	4.6097	-3.79378	0.000965194	0.00915101	-1.1338
GCNT1	-1.09491	6.63853	-3.79334	0.000966236	0.00915664	-1.13485
ID3	-1.70755	6.36728	-3.79102	0.000971743	0.00919956	-1.14036
AKT1	1.04958	7.88769	3.7902	0.000973683	0.00920923	-1.14229
MGST2	1.10516	9.8311	3.79005	0.000974036	0.00920923	-1.14265
GSTM5	-1.15691	8.22276	-3.78847	0.000977826	0.00923653	-1.14641
BACE2	1.83322	8.01857	3.78044	0.000997226	0.00939809	-1.16546
KCTD1	1.01123	6.4807	3.77859	0.00100176	0.00942779	-1.16986
SDPR	-1.87483	4.55339	-3.77778	0.00100375	0.00943348	-1.17179
RABGEF1	1.12658	6.33449	3.77579	0.00100864	0.00946325	-1.1765
LOC441666	1.09527	4.06956	3.77314	0.00101521	0.00951936	-1.1828
BAG5	1.00018	7.28163	3.77223	0.00101748	0.00953625	-1.18496
EFHC1	-1.18653	7.47647	-3.7675	0.0010293	0.00963823	-1.19616
DPY19L2P2	-1.69578	6.03291	-3.76688	0.00103087	0.00964411	-1.19764
PGP	1.01246	6.81524	3.76332	0.00103988	0.00970706	-1.20607
SDC2	-1.55428	7.26654	-3.76313	0.00104038	0.00970706	-1.20653
MFHAS1	1.31619	8.03911	3.75486	0.00106162	0.00985965	-1.22613
CHSY1	1.03625	10.1046	3.75419	0.00106336	0.00987128	-1.22771
CTSO	-1.1445	8.20138	-3.75329	0.00106571	0.00988867	-1.22985
DDX39A	1.7092	9.33611	3.75043	0.00107319	0.00994903	-1.23663
PRKCDBP	-1.24472	8.56134	-3.74826	0.00107889	0.00997922	-1.24176
ZMYM1	1.1201	7.01242	3.74767	0.00108046	0.00998474	-1.24317
FTX	-1.41304	5.7531	-3.74666	0.00108312	0.00999574	-1.24555
OSR1	-1.11465	4.06933	-3.74395	0.00109031	0.0100486	-1.25197
ARL6IP1	1.03438	11.4628	3.74175	0.00109621	0.0100802	-1.2572
TMPRSS4	1.90143	7.31522	3.73933	0.00110272	0.0101173	-1.26293
ZNF267	1.02163	8.21286	3.73845	0.00110509	0.0101307	-1.265
CKAP5	1.08094	8.31514	3.73731	0.00110818	0.0101446	-1.26771
DDX17	-1.17612	8.42394	-3.73281	0.00112041	0.0102087	-1.27835
SEPHS1	1.12296	8.3086	3.73254	0.00112115	0.0102087	-1.27898
TUBB	1.20561	11.2164	3.73247	0.00112136	0.0102087	-1.27917
BLACAT1	1.20728	7.16055	3.73236	0.00112166	0.0102087	-1.27943
EPS8	-1.79828	8.11717	-3.73163	0.00112364	0.0102222	-1.28113
SFTPD	-1.11404	7.38662	-3.72899	0.00113093	0.0102794	-1.2874
FGF18	1.02245	6.15554	3.72701	0.0011364	0.0103149	-1.29207
UBE2V2	1.07589	7.07165	3.7229	0.00114788	0.0104011	-1.3018
RHOBTB1	-1.30796	7.11847	-3.72265	0.00114858	0.0104028	-1.30239
NFE2L3	1.43527	5.77998	3.72069	0.00115409	0.0104342	-1.30703
LRIF1	1.36892	6.39712	3.71476	0.00117093	0.0105492	-1.32105
CLK1	-1.47602	8.63706	-3.71356	0.00117435	0.0105753	-1.32387
ELTD1	1.31717	4.27602	3.71169	0.00117972	0.0106102	-1.3283
EMG1	1.0639	9.27961	3.70466	0.00120016	0.0107557	-1.34492
QPRT	1.64682	8.08552	3.70378	0.00120274	0.0107741	-1.347
SPAST	1.03441	6.97633	3.6981	0.00121951	0.0108767	-1.3604
CTCFL	2.87768	6.12749	3.69736	0.00122172	0.0108917	-1.36215
ADAMTS3	-2.23777	5.79064	-3.6968	0.00122339	0.0109018	-1.36348
DDX25	-1.06628	5.31979	-3.69288	0.00123516	0.0109876	-1.37274
PP7080	1.15707	5.62373	3.6873	0.00125209	0.0110996	-1.38591
DCXR	1.04851	8.06262	3.68499	0.00125915	0.0111433	-1.39135
VTCN1	2.56368	8.45523	3.68489	0.00125945	0.0111433	-1.39159
DYNLRB2	-1.2763	5.35935	-3.68461	0.00126033	0.0111433	-1.39226
EXOSC5	1.21751	7.82124	3.68455	0.00126051	0.0111433	-1.3924
ATL1	-1.20422	6.86609	-3.68226	0.00126759	0.0111981	-1.39781
PRKCI	1.42738	7.79441	3.67025	0.00130524	0.0114517	-1.42613
CAPS	1.01875	6.23311	3.66952	0.00130758	0.0114574	-1.42786
MUC20	1.13189	5.86575	3.66662	0.00131684	0.0115241	-1.43468
ST6GALNAC1	2.64831	6.9484	3.66661	0.00131688	0.0115241	-1.43471
PTPN13	-1.62131	4.9696	-3.66027	0.00133739	0.0116587	-1.44966
ATP5I	1.22875	10.2641	3.65879	0.00134222	0.0116859	-1.45314
TOP1	1.0942	9.50302	3.65838	0.00134354	0.0116874	-1.45409
KEAP1	1.11679	8.60379	3.65343	0.00135984	0.0117748	-1.46575
ASPSCR1	1.0581	5.93319	3.65253	0.00136282	0.0117922	-1.46787
TM7SF2	1.4094	7.51201	3.65246	0.00136308	0.0117922	-1.46805
ZNF485	1.11159	4.9098	3.65046	0.00136972	0.0118342	-1.47275
ABCG2	-1.35001	5.90213	-3.64992	0.00137153	0.0118376	-1.47402
STRADB	-1.13997	8.10196	-3.64961	0.00137257	0.0118376	-1.47475
ERV3-2	1.72126	6.86261	3.64409	0.00139113	0.011959	-1.48774
ALDH3B2	1.20529	5.16525	3.63972	0.00140602	0.0120668	-1.49803
OXTR	2.71307	6.34983	3.63813	0.00141147	0.0120882	-1.50177
IER2	1.10338	10.7226	3.63575	0.00141966	0.0121228	-1.50736
CCT7	1.04205	10.6578	3.63138	0.00143486	0.012222	-1.51765
SLC7A5	1.33873	7.27532	3.63052	0.00143786	0.0122387	-1.51966
PEBP1	1.21791	10.8096	3.62846	0.00144508	0.0122784	-1.52451
SEPHS2	1.06116	10.1275	3.62816	0.00144613	0.0122822	-1.5252
NET1	1.27791	9.71876	3.62165	0.00146923	0.0124165	-1.54051
HIST1H2BK	1.61096	9.83487	3.61643	0.00148802	0.0125546	-1.55278
OR7E14P	1.43814	6.4016	3.61623	0.00148872	0.0125553	-1.55324
ZNF468	1.12619	8.12778	3.61585	0.0014901	0.0125618	-1.55413
MARCO	-2.31998	6.98517	-3.61548	0.00149147	0.0125645	-1.55502
COL21A1	-1.445	4.48572	-3.6113	0.00150668	0.0126382	-1.56482
GSDMD	1.30372	8.2859	3.61118	0.00150714	0.0126382	-1.56512
MAF1	1.25869	9.04051	3.61109	0.00150748	0.0126382	-1.56533
MPDZ	-1.55237	7.71269	-3.611	0.00150781	0.0126382	-1.56555
HPSE	-1.41406	6.62893	-3.60806	0.00151861	0.0127174	-1.57243
C7orf55	1.28117	8.07545	3.60792	0.00151912	0.0127174	-1.57276
ANXA1	-1.56242	8.38019	-3.6065	0.00152439	0.0127406	-1.5761
MEOX1	2.1822	6.27422	3.60576	0.00152713	0.0127531	-1.57784
TLCD2	-1.26317	5.8592	-3.60265	0.00153872	0.0128133	-1.58514
SLBP	1.27379	9.15413	3.60226	0.00154019	0.0128203	-1.58606
LSG1	1.00745	8.10746	3.60135	0.00154359	0.0128382	-1.58819
RERG	-2.44702	7.43132	-3.60112	0.00154447	0.0128402	-1.58873
PRSS8	1.35669	7.75664	3.60043	0.00154703	0.0128511	-1.59034
STK32B	-1.148	6.99291	-3.59826	0.00155522	0.0128882	-1.59543
STC2	1.00299	6.6142	3.59825	0.00155527	0.0128882	-1.59546
VPS37B	1.195	7.25043	3.59753	0.00155798	0.0129054	-1.59714
AB074162 /// MIR181A2HG	-1.12212	6.49868	-3.58833	0.00159322	0.0131018	-1.61873
COL8A1	-1.20295	5.01689	-3.58769	0.00159569	0.0131126	-1.62023
SLIT2	-1.65256	8.16366	-3.58362	0.00161155	0.0132153	-1.62977
LONRF2	-2.11365	7.20407	-3.5808	0.0016226	0.0133006	-1.63636
LAMP3	2.18194	7.235	3.57204	0.00165749	0.0135299	-1.65688
GJB1	1.16926	7.4204	3.57042	0.00166402	0.0135695	-1.66068
NOX4	1.29758	5.24981	3.56502	0.00168596	0.0137101	-1.67331
BAZ1A	1.11168	7.74064	3.55761	0.00171657	0.0138983	-1.69066
ATP6V0B	1.02782	9.42851	3.5571	0.00171869	0.0139045	-1.69185
PRELID1	1.05788	9.19076	3.55564	0.00172478	0.0139366	-1.69526
HIST1H2BE	1.05355	6.77785	3.55406	0.00173141	0.0139642	-1.69896
CYSTM1	-1.68551	9.32285	-3.55403	0.00173153	0.0139642	-1.69903
CAPG	1.53731	7.96139	3.55143	0.00174247	0.0140196	-1.7051
PDIA6	1.11854	11.2247	3.54812	0.00175652	0.0141156	-1.71284
NCEH1	2.08519	6.3467	3.54583	0.0017663	0.014172	-1.71819
TMEM2	-1.13307	6.73266	-3.54319	0.00177765	0.0142408	-1.72437
C12orf56	1.72753	5.83731	3.54303	0.00177833	0.0142408	-1.72473
FAS	-1.04308	6.10796	-3.54254	0.00178047	0.0142521	-1.72589
CTPS2	1.06088	7.84087	3.54226	0.00178165	0.014256	-1.72653
SYNCRIP	1.01425	8.7458	3.53819	0.00179933	0.0143637	-1.73605
DSC3	-2.22487	5.69728	-3.53623	0.0018079	0.0144209	-1.74063
BRI3BP	1.18948	9.5441	3.52818	0.00184349	0.0146136	-1.75941
PRSS2	1.65702	6.22984	3.52565	0.00185482	0.0146921	-1.76531
VDAC2	1.0304	10.9082	3.52476	0.00185883	0.0147182	-1.7674
ESF1	1.32983	7.58916	3.52232	0.00186983	0.0147938	-1.77308
SEH1L	1.01568	8.39131	3.52173	0.00187252	0.0148008	-1.77446
JTB	1.00546	11.7119	3.52122	0.00187483	0.0148008	-1.77565
HOXA1	-1.12189	5.62384	-3.51704	0.00189389	0.0149253	-1.78539
POLI	-1.35963	5.94633	-3.51691	0.00189448	0.0149253	-1.78569
KAT2B	-1.67919	8.54142	-3.51259	0.00191443	0.0150478	-1.79578
CCDC6	1.60767	10.1604	3.51069	0.00192324	0.0150938	-1.8002
SDC1	1.3395	6.61265	3.50959	0.00192835	0.0151165	-1.80275
TMEM176B	-1.04519	5.91278	-3.50899	0.00193118	0.0151205	-1.80417
FOXL2	-1.7226	4.47695	-3.50872	0.00193243	0.0151205	-1.80479
TMEM38A	1.05202	6.4255	3.50659	0.00194243	0.0151713	-1.80976
BABAM1	1.26504	8.96912	3.50245	0.00196199	0.0152981	-1.81941
PLCB4	1.38991	5.17875	3.49735	0.00198634	0.0154409	-1.83128
FDXR	-1.16615	6.29321	-3.49695	0.00198825	0.0154487	-1.8322
CORO2A	1.24551	6.20689	3.49558	0.00199486	0.0154836	-1.8354
FBXO6	1.67987	6.70124	3.49525	0.00199644	0.01549	-1.83616
SLC16A1	-1.21686	7.07292	-3.49125	0.00201585	0.0156169	-1.84547
MRPS6	1.2906	9.52211	3.48985	0.00202266	0.0156578	-1.84872
CNTN4	-1.17301	5.05029	-3.48706	0.00203634	0.0157399	-1.85521
TUBG1	1.60175	7.56405	3.47846	0.00207916	0.0160406	-1.87522
ATP5B	1.07423	11.7648	3.47391	0.00210213	0.0161994	-1.88579
PDGFC	-1.09403	7.80218	-3.47254	0.00210907	0.0162285	-1.88896
NOV	1.62694	7.30388	3.4692	0.00212619	0.0163479	-1.89674
ASL	1.20495	7.07992	3.46563	0.00214456	0.0164582	-1.90501
FBLN2	1.0311	6.51913	3.46387	0.00215371	0.0165037	-1.90911
KRT8	1.3741	10.3689	3.45645	0.00219261	0.0167479	-1.92631
CCND1	1.6547	7.68674	3.45191	0.00221681	0.0168735	-1.93687
LOC100129098	1.34201	8.52658	3.44936	0.00223048	0.0169649	-1.94278
FAM133A	-1.39378	4.6813	-3.44782	0.00223874	0.0170025	-1.94633
WDR72	1.12981	5.36196	3.44708	0.00224273	0.0170265	-1.94804
FAM221A	-1.4532	7.69434	-3.44298	0.00226504	0.0171704	-1.95756
HMOX1	-1.05137	7.35677	-3.43877	0.00228814	0.0173326	-1.9673
CCDC137	1.04186	6.70877	3.4354	0.00230683	0.0174483	-1.97512
PRDX6	1.03471	11.6405	3.43492	0.00230947	0.0174554	-1.97622
MUC16	2.06724	8.33047	3.43452	0.00231171	0.0174594	-1.97715
CCDC77	1.09605	6.71529	3.43146	0.00232884	0.0175564	-1.98424
GPR137C	1.23047	4.71252	3.42928	0.0023411	0.017611	-1.98929
HSD17B6	-1.89186	5.09466	-3.42743	0.00235156	0.0176561	-1.99357
JAM2	-1.01876	5.68545	-3.42695	0.00235426	0.0176634	-1.99467
GLO1	1.03661	11.1355	3.42319	0.00237569	0.0177656	-2.00337
MCAM	1.30326	7.67903	3.42246	0.00237989	0.017784	-2.00507
GGT6	1.4065	6.98445	3.41393	0.00242928	0.0180542	-2.02479
METTL7B	1.77363	7.54936	3.41256	0.00243732	0.0180876	-2.02796
LAGE3	1.01334	8.35381	3.41151	0.00244347	0.0181201	-2.03038
NRTN	1.60233	4.72493	3.41082	0.00244751	0.0181435	-2.03197
OLFML3	-1.43813	8.24424	-3.40326	0.00249245	0.0184186	-2.04943
FAIM	1.47942	8.18952	3.40268	0.00249591	0.0184355	-2.05077
HEY2	1.35053	6.78944	3.40249	0.00249706	0.0184374	-2.05121
SCARNA15	1.1808	6.90242	3.39901	0.00251809	0.0185458	-2.05926
GSTA4	-1.1816	7.56666	-3.39707	0.00252983	0.0186132	-2.06372
PTS	1.12996	9.45766	3.39705	0.00252997	0.0186132	-2.06377
FZD2	1.16754	6.41114	3.39671	0.00253203	0.018615	-2.06456
RAB38	-1.55044	8.12624	-3.39411	0.00254791	0.0187048	-2.07055
PRR15	-1.40745	6.5424	-3.3933	0.0025529	0.0187213	-2.07243
TIMD4	-1.02736	5.03901	-3.39179	0.0025622	0.0187693	-2.07592
KB-431C1.4	1.51487	7.16471	3.38369	0.00261256	0.0190631	-2.09459
LCN2	2.63844	8.2868	3.38215	0.00262224	0.0191207	-2.09814
FBXO34	1.09962	9.00134	3.3815	0.00262635	0.0191433	-2.09964
LOC102659288	2.90294	6.14305	3.38025	0.00263423	0.0191802	-2.10251
UBE2S	1.33885	6.38294	3.3785	0.00264533	0.0192336	-2.10654
ATP5G1	1.07397	9.73081	3.37679	0.0026562	0.019299	-2.11048
SERPING1	-1.64073	9.96789	-3.3759	0.00266189	0.0193334	-2.11253
UBE2E1	1.00388	11.1363	3.36598	0.00272607	0.0196947	-2.13537
TTI1	1.01931	7.77679	3.36493	0.00273296	0.0197236	-2.13779
TJP3	1.11793	5.73733	3.36423	0.00273754	0.0197427	-2.13939
CRNDE	-2.41821	7.35097	-3.36291	0.00274626	0.0197847	-2.14245
UQCRQ	1.15237	9.84756	3.35989	0.00276621	0.0198864	-2.14938
ATP5G3	1.04243	9.21934	3.35906	0.00277176	0.0198983	-2.1513
RAB25	1.90157	7.26853	3.35798	0.0027789	0.0199403	-2.15377
TNFRSF12A	1.2115	7.76518	3.35617	0.00279104	0.0200005	-2.15794
FRMD6	-1.42405	7.31268	-3.3561	0.00279151	0.0200005	-2.15811
HLTF	1.60217	8.98665	3.35583	0.0027933	0.0200038	-2.15872
VSIG10	1.02826	7.12972	3.35547	0.00279575	0.0200143	-2.15956
CLDN10	2.32395	7.14758	3.35443	0.0028027	0.0200553	-2.16194
CYS1	-1.95591	5.51107	-3.35146	0.00282277	0.0201655	-2.16878
RUNDC3B	-1.13731	4.68633	-3.35081	0.00282715	0.0201756	-2.17026
GCLM	1.15087	6.67774	3.34499	0.00286684	0.0203736	-2.18362
CLIP4	-1.13922	7.45532	-3.34298	0.00288069	0.0204507	-2.18824
RGS18	-1.10131	4.27244	-3.34266	0.00288292	0.0204524	-2.18898
RNA45S5	1.85991	7.78657	3.33791	0.00291594	0.0206222	-2.19988
CCL28	1.1175	5.78913	3.33608	0.00292872	0.020684	-2.20407
LOC100129455	-1.04376	6.29222	-3.33428	0.00294142	0.0207522	-2.20822
EFNA5	-1.14883	6.83688	-3.33182	0.0029588	0.0208461	-2.21386
RHBDF2	1.00389	6.97518	3.32668	0.00299543	0.021039	-2.22564
BPGM	1.264	7.55829	3.31705	0.00306527	0.0214334	-2.2477
ISG15	2.21185	8.80215	3.30783	0.00313365	0.0218374	-2.26881
C12orf5	1.10481	7.14789	3.29984	0.00319413	0.0221833	-2.28709
GPR137B	-1.5595	7.84241	-3.29864	0.0032033	0.0222243	-2.28984
PSMB5	1.25394	10.8084	3.29308	0.00324613	0.0224682	-2.30254
STAU1	1.025	10.4195	3.28997	0.00327035	0.0225732	-2.30964
IFI16	-1.93301	9.29844	-3.28991	0.00327076	0.0225732	-2.30977
STK38L	1.18658	8.68866	3.28985	0.00327124	0.0225732	-2.30991
ZNF22	1.0106	8.37771	3.2868	0.00329518	0.0226925	-2.31688
POLD2	1.21215	7.60758	3.28568	0.00330401	0.022738	-2.31944
IFI27	2.42412	9.31614	3.28514	0.00330829	0.0227598	-2.32067
INHBB	1.72303	7.35914	3.2739	0.00339827	0.0232771	-2.34632
LINC00893	-1.14404	4.06124	-3.27355	0.00340105	0.0232883	-2.3471
LOC100507073	-1.09185	5.68077	-3.27117	0.00342045	0.0233868	-2.35254
GPX7	1.17355	6.63041	3.26863	0.00344123	0.0234848	-2.35832
SORL1	1.28028	8.84001	3.26812	0.00344542	0.0235043	-2.35949
MTIF2	1.09476	9.82264	3.26615	0.00346161	0.0235846	-2.36397
SYNM	1.25217	6.96407	3.26471	0.00347358	0.023637	-2.36726
FCGR3B	-1.44076	7.46866	-3.26467	0.00347392	0.023637	-2.36736
SHMT2	1.14798	8.28655	3.2645	0.00347529	0.0236384	-2.36773
RYR1	1.24015	5.10143	3.26395	0.00347984	0.0236492	-2.36898
GLDN	1.04018	6.76818	3.26389	0.00348034	0.0236492	-2.36912
HAUS3	1.03936	7.61208	3.26236	0.00349304	0.0237119	-2.3726
BST2	1.32875	10.2509	3.25947	0.00351717	0.0238599	-2.37918
ANKRD36B	-1.62726	5.67856	-3.24934	0.00360313	0.024282	-2.40223
TDG	1.14681	10.483	3.24651	0.00362754	0.024418	-2.40868
LTBP1	1.37174	7.70927	3.24596	0.00363226	0.024418	-2.40992
MRGPRF	-1.38278	6.00552	-3.24534	0.00363765	0.0244371	-2.41134
EFNB2	1.53319	8.86706	3.24156	0.00367055	0.024602	-2.41993
SMKR1	1.30305	6.6565	3.23161	0.00375849	0.0250131	-2.44252
ZFPM2	-2.46021	8.12558	-3.22836	0.00378766	0.0251364	-2.4499
MANEAL	1.01648	5.56107	3.22407	0.00382643	0.0253362	-2.45961
ROR1	-1.09563	6.82563	-3.22258	0.00384007	0.0253823	-2.46301
TRIM68	-1.17286	6.93807	-3.22236	0.00384208	0.0253823	-2.46351
ZNF738	1.13115	7.03817	3.22006	0.0038631	0.0255096	-2.46871
MATR3	1.11842	5.41495	3.21867	0.00387594	0.0255565	-2.47187
BCAP31	1.29426	10.5387	3.21391	0.00391997	0.0257886	-2.48264
TRMT61B	1.02799	8.34061	3.21367	0.00392219	0.0257949	-2.48318
SGK1	-1.41982	9.55685	-3.20814	0.00397413	0.0260878	-2.49573
ADRA2C	1.41314	7.0715	3.20596	0.0039947	0.0262044	-2.50065
C2orf69	1.05331	8.38984	3.20255	0.00402716	0.0263498	-2.50836
SULF2	-1.15552	7.05182	-3.20022	0.00404953	0.0264707	-2.51364
FAM65B	-1.15864	5.76187	-3.19688	0.00408171	0.0266301	-2.52118
GLRX2	1.06405	8.1218	3.19255	0.00412388	0.0268538	-2.53098
SLC41A2	-1.21818	6.71009	-3.18949	0.00415393	0.0270236	-2.53789
FBN1	-1.18555	6.45759	-3.18871	0.00416165	0.0270567	-2.53966
PNISR	-1.00641	7.89877	-3.18454	0.00420292	0.0272816	-2.54906
GIMAP2	-1.76823	6.627	-3.17404	0.00430879	0.0278364	-2.57275
CCDC28A	-1.11731	7.91212	-3.17033	0.00434686	0.027994	-2.58112
CYBRD1	-1.59802	8.15387	-3.17033	0.00434688	0.027994	-2.58113
EOGT	-1.20884	4.91562	-3.16749	0.00437617	0.0281207	-2.58752
LINC00176	1.2874	6.02323	3.16603	0.00439136	0.0281857	-2.59082
GATA6	-1.58631	7.03525	-3.16599	0.00439178	0.0281857	-2.59091
CUTA	1.01835	11.6223	3.16252	0.00442802	0.0283559	-2.59873
EYA2	1.99222	8.2231	3.16083	0.00444573	0.0284427	-2.60253
RARRES2	-1.73269	9.18933	-3.15671	0.0044892	0.0286581	-2.61179
RBBP8	1.41261	9.74789	3.1477	0.00458587	0.0290643	-2.63205
GPR158	1.21867	6.51459	3.14738	0.00458941	0.0290643	-2.63278
EP300-AS1	1.32719	4.38268	3.14708	0.00459268	0.0290643	-2.63346
TIMP1	-1.91763	9.98216	-3.14702	0.00459324	0.0290643	-2.63358
NDUFB11	1.16672	10.409	3.14118	0.00465711	0.0293658	-2.64671
LOC100130232	-1.72522	4.56881	-3.1396	0.00467456	0.0294363	-2.65027
FXYD3	1.03682	7.93183	3.13398	0.00473703	0.0296935	-2.66289
TMPRSS3	1.34752	8.13888	3.1328	0.00475018	0.0297486	-2.66552
GUCY1A3	1.12287	5.38276	3.13249	0.00475369	0.0297524	-2.66622
APOA1	1.74889	8.26174	3.12941	0.00478841	0.0298965	-2.67314
CHCHD10	1.24983	7.39595	3.12712	0.00481424	0.030012	-2.67825
DARS	1.02053	9.27921	3.12408	0.00484893	0.0301915	-2.68507
CLEC2B	-1.03651	6.29189	-3.1211	0.0048831	0.0303396	-2.69175
KRT23	2.30751	6.76575	3.11541	0.00494916	0.0306863	-2.70451
BID	1.0518	7.26371	3.11296	0.00497779	0.0308343	-2.70999
NMU	1.70264	7.78456	3.10677	0.00505091	0.0311364	-2.72384
LIPA	-1.44172	9.2012	-3.10512	0.00507062	0.0311921	-2.72753
C6orf132	1.14108	6.24687	3.10324	0.00509311	0.0312858	-2.73173
CAV2	-1.58844	6.76201	-3.10222	0.00510535	0.0313285	-2.73401
RAB39B	1.10996	3.9785	3.10122	0.00511733	0.0313744	-2.73624
SYNDIG1	1.18501	6.72541	3.09974	0.00513523	0.0314383	-2.73955
MAP7D2	1.49553	6.0045	3.09942	0.00513907	0.031443	-2.74026
MT1F	1.2344	10.1906	3.09024	0.00525129	0.0319861	-2.76076
ROMO1	1.44013	9.15236	3.08906	0.00526593	0.0320467	-2.7634
HAT1	1.05764	9.30702	3.08576	0.00530689	0.0322384	-2.77075
KLHL13	-1.37268	6.03224	-3.08365	0.00533338	0.0323639	-2.77548
KLHL24	1.21879	7.58502	3.08336	0.00533697	0.0323639	-2.77612
RGL1	-1.37387	9.55825	-3.07976	0.0053823	0.0325612	-2.78414
NETO2	1.56214	5.99671	3.07308	0.00546745	0.0329788	-2.79902
PIGU	1.06506	8.01167	3.06734	0.00554164	0.0332894	-2.8118
HENMT1	1.02424	7.9337	3.06383	0.00558753	0.0335154	-2.81962
EDNRA	-1.08648	5.96046	-3.06353	0.00559142	0.033519	-2.82028
MTCH2	1.11145	8.98578	3.06219	0.00560908	0.0336052	-2.82326
ANXA5	-1.11173	11.1371	-3.06188	0.00561312	0.0336123	-2.82395
COL16A1	-1.1986	6.54716	-3.05696	0.00567822	0.03393	-2.83487
HSPA2	-1.88366	7.84457	-3.05241	0.00573913	0.0341742	-2.84498
MAN1A1	-1.36337	5.91303	-3.0469	0.00581371	0.0345179	-2.85721
GORASP2	1.03082	9.94685	3.04142	0.00588895	0.0348735	-2.86939
FAM213B	1.01246	7.86751	3.03433	0.0059874	0.0353032	-2.88508
SLC25A5	1.01212	11.3672	3.0259	0.00610677	0.0358521	-2.90376
PVRL3	1.70321	8.09203	3.02521	0.00611656	0.0358741	-2.90528
GPI	1.3302	9.94119	3.01744	0.00622872	0.0363905	-2.92247
DONSON	1.02925	6.06911	3.01324	0.00629011	0.0366863	-2.93175
HOXA5	-1.74409	6.39844	-3.01186	0.00631051	0.0367948	-2.93481
NMI	1.20323	9.76429	3.00675	0.00638613	0.0371405	-2.94607
RND3	1.11711	9.86433	3.00388	0.00642919	0.0373534	-2.95242
ZNF512B	1.00549	6.61168	3.00093	0.0064736	0.0375744	-2.95893
MCCC1	1.14789	8.55698	2.99427	0.00657489	0.0379899	-2.9736
PTGER2	-1.34242	5.56501	-2.99148	0.00661779	0.0381872	-2.97974
LEMD1	2.01846	8.11855	2.98963	0.00664635	0.0383054	-2.98381
SLC25A38	1.02185	9.39372	2.98553	0.00671015	0.038597	-2.99284
LY96	-1.6316	6.18216	-2.9774	0.00683844	0.0392027	-3.01072
SLC44A2	1.0663	8.29758	2.97333	0.00690352	0.0394873	-3.01966
CHODL	1.6013	7.22769	2.97306	0.00690792	0.0395014	-3.02026
ZNF593	1.18843	7.48688	2.96591	0.00702371	0.0400181	-3.03595
SLC16A4	-1.51086	4.56546	-2.96518	0.0070357	0.040053	-3.03756
SLIRP	1.09774	9.84159	2.96491	0.00704015	0.0400672	-3.03816
NDUFA13	1.00213	10.5192	2.96299	0.00707164	0.0402016	-3.04237
ICAM3	1.01964	7.14887	2.96255	0.0070789	0.0402206	-3.04334
SCGB1D2	1.884	7.03975	2.96082	0.00710741	0.0403377	-3.04713
DPYSL2	-1.85674	9.10391	-2.95601	0.0071872	0.0406665	-3.05766
TRIM59	1.73008	6.81358	2.94181	0.00742814	0.0417527	-3.08875
PSMG3	1.08315	8.60385	2.94028	0.00745449	0.0418204	-3.09209
ATP8B1	1.09281	8.9992	2.93267	0.00758729	0.0423448	-3.10873
ITGB8	1.12605	6.61813	2.93099	0.00761679	0.0424515	-3.11238
RPN2	1.05483	10.9083	2.92345	0.0077511	0.0430446	-3.12884
TMEM147	1.18928	9.80445	2.92197	0.0077776	0.0431455	-3.13206
C12orf75	1.3092	8.27695	2.9208	0.00779873	0.0432309	-3.13461
HIST1H2BC	1.42868	6.14383	2.91926	0.00782658	0.0432829	-3.13797
CTNNAL1	-1.23193	8.39383	-2.91809	0.00784786	0.0433614	-3.14053
ID2	-1.06597	7.81113	-2.90983	0.00799926	0.0439959	-3.15851
PCDHB16	-1.78145	5.9425	-2.89952	0.00819217	0.044828	-3.18093
ECI1	1.0726	8.50794	2.89575	0.00826384	0.0451477	-3.18912
PABPC4L	1.25179	7.01955	2.89406	0.00829608	0.0452739	-3.19279
BIRC3	-1.29811	6.57901	-2.89138	0.0083476	0.0454838	-3.19861
ID1	-1.93656	6.60767	-2.89071	0.0083605	0.0455178	-3.20006
SST	2.73899	7.34215	2.8895	0.00838393	0.0455968	-3.20269
WNT7A	1.00756	6.45731	2.8888	0.00839739	0.045638	-3.2042
HMCN1	-1.91656	6.42246	-2.88863	0.00840062	0.045638	-3.20456
MFSD10	1.09388	7.00694	2.88765	0.00841969	0.0456945	-3.20669
MORC4	-1.08392	6.97337	-2.88714	0.00842964	0.0457222	-3.2078
TMEM45B	1.25927	5.63351	2.88608	0.00845031	0.0457871	-3.2101
COL23A1	1.12496	6.43076	2.88597	0.00845249	0.0457871	-3.21035
NDUFV2	1.13046	8.34736	2.88138	0.00854242	0.0461643	-3.22029
MICU3	-2.06741	6.32675	-2.87947	0.00858013	0.0462825	-3.22443
LOC613266	2.30095	5.95372	2.87818	0.00860567	0.0463591	-3.22723
SCG5	-2.17284	8.28474	-2.87707	0.00862765	0.0464531	-3.22962
PPBP	-1.07789	4.02275	-2.86953	0.00877887	0.0470805	-3.24594
C19orf52	1.04839	7.51775	2.86889	0.0087918	0.047089	-3.24733
CEBPZ	1.1316	7.99174	2.8619	0.00893431	0.0476528	-3.26242
C7orf57	1.35917	3.89501	2.8609	0.00895496	0.047738	-3.26459
GPX1	1.11916	11.5547	2.85492	0.00907877	0.0482096	-3.27748
CD97	1.31354	7.42043	2.854	0.00909812	0.0482748	-3.27948
CSTA	-1.82237	7.70438	-2.85205	0.00913886	0.0484533	-3.28367
TRIM28	1.34413	8.96229	2.85145	0.00915151	0.0485077	-3.28497
WASIR1 /// WASIR1 /// WASIR2 /// WASIR2	1.42848	5.39894	2.84971	0.00918815	0.0486767	-3.28872
E2F5	1.16524	7.59708	2.84518	0.00928433	0.04911	-3.29849
ADK	1.054	7.92753	2.84335	0.00932353	0.0492664	-3.30244
GSAP	-1.31159	7.41893	-2.8432	0.00932654	0.0492695	-3.30274
TGFB1I1	-1.22274	7.26058	-2.84106	0.0093725	0.049474	-3.30735
LIPG	1.2493	4.44164	2.83971	0.00940163	0.0495639	-3.31026
ABCB10	1.06548	7.69017	2.83917	0.00941339	0.0496131	-3.31143

## Sheet: GSE69428-DEG
Supplementary Table 2. The details of significant DEGs from GSE36668, GSE54388 and GSE69428 datasets.
Genesymbol	logFC	AveExpr	t	P.Value	adj.P.Val	B
CRISP3	-8.8	5.8151	-27.9766	1.02105e-17	2.08906e-13	27.468
CRISP2	-6.85055	5.25588	-15.9341	5.83153e-13	5.96566e-09	19.1636
CRABP2	2.18276	4.97471	15.0434	1.72202e-12	1.17442e-08	18.2256
NUF2	3.54418	3.49599	14.1991	5.05764e-12	2.57359e-08	17.2765
GINS1	3.03948	5.04278	14.0332	6.28933e-12	2.57359e-08	17.0827
AURKA	2.546	3.47511	13.6296	1.07844e-11	3.67749e-08	16.6006
FANCI	1.53167	3.53065	12.2386	7.67414e-11	2.14231e-07	14.8183
C6	-5.36022	4.78246	-12.1792	8.37658e-11	2.14231e-07	14.7378
CENPF	2.0725	3.66745	11.6801	1.7724e-10	3.67428e-07	14.0458
CDCA3	2.08181	3.43085	11.6715	1.79583e-10	3.67428e-07	14.0336
FAM65B	-2.44444	3.44585	-11.4385	2.57008e-10	4.39054e-07	13.7007
EZH2	3.42441	5.21035	11.4372	2.57509e-10	4.39054e-07	13.6989
TTK	2.80217	3.02258	10.9643	5.42171e-10	8.53294e-07	13.0038
DTL	1.88224	2.75662	10.8949	6.05885e-10	8.85457e-07	12.8997
STMN1	1.4552	3.43067	10.6947	8.3751e-10	1.09992e-06	12.5957
C9orf24	-4.56854	4.93805	-10.6783	8.60149e-10	1.09992e-06	12.5706
SBK1	2.26215	4.08608	10.3686	1.43237e-09	1.7239e-06	12.0899
UBE2C	2.9294	5.07893	10.3003	1.60511e-09	1.82447e-06	11.9823
ZBBX	-4.93362	4.84056	-10.1385	2.10685e-09	2.18175e-06	11.7249
KIF18B	2.21552	3.99658	10.1201	2.17355e-09	2.18175e-06	11.6953
ESPL1	2.50935	5.01201	10.0734	2.35238e-09	2.18175e-06	11.6204
SLC7A2	-1.47013	3.08416	-10.066	2.38194e-09	2.18175e-06	11.6085
EFNA4	1.96396	3.55196	10.0488	2.45261e-09	2.18175e-06	11.5808
PIGR	-1.77051	3.41925	-9.78044	3.88698e-09	3.08487e-06	11.1433
C20orf85	-5.44705	5.64103	-9.77	3.95793e-09	3.08487e-06	11.1261
CD69	-3.74145	4.33393	-9.76432	3.99711e-09	3.08487e-06	11.1167
KIF20A	2.92473	4.39223	9.75376	4.07094e-09	3.08487e-06	11.0993
ALDH1A1	-2.90821	3.65819	-9.70613	4.42212e-09	3.2313e-06	11.0205
PTGS2	-2.41442	2.46541	-9.66549	4.74672e-09	3.34889e-06	10.953
PRC1	3.44805	4.2844	9.60403	5.28529e-09	3.54549e-06	10.8505
DNAH10	-1.32664	2.76255	-9.59475	5.37196e-09	3.54549e-06	10.835
ASPM	2.20562	2.51781	9.5326	5.99195e-09	3.8311e-06	10.7308
NUSAP1	2.97017	4.19015	9.49778	6.37129e-09	3.9502e-06	10.6722
FABP6	-1.72961	2.84818	-9.40659	7.4879e-09	4.4099e-06	10.5179
AUNIP	1.28477	2.69822	9.4024	7.54382e-09	4.4099e-06	10.5108
TTC25	-4.18501	5.78755	-9.34759	8.3169e-09	4.71695e-06	10.4175
PLCH1	-1.30232	2.58033	-9.33341	8.53016e-09	4.71695e-06	10.3932
DLC1	-1.31908	2.71604	-9.28263	9.341e-09	5.02939e-06	10.3063
SAT1	-1.6907	9.67574	-9.26733	9.60068e-09	5.03667e-06	10.2801
NBEA	-2.93302	4.28275	-9.17771	1.12804e-08	5.76994e-06	10.1256
DNAAF1	-2.05355	4.05472	-9.1103	1.2743e-08	6.17561e-06	10.0087
ORC6	1.59068	6.37668	9.10018	1.29791e-08	6.17561e-06	9.99109
WDR16	-3.52671	4.43725	-9.06065	1.39453e-08	6.31843e-06	9.92218
VNN2	-1.73396	3.37782	-9.05178	1.41722e-08	6.31843e-06	9.90669
CDHR3	-3.98525	4.69761	-9.05049	1.42057e-08	6.31843e-06	9.90443
NXF3	-2.43076	3.16305	-8.91172	1.83103e-08	7.97082e-06	9.66061
OGDHL	2.03363	3.7282	8.87711	1.95143e-08	8.16729e-06	9.59938
CXCL2	-2.34185	2.93286	-8.87584	1.956e-08	8.16729e-06	9.59713
POLQ	1.8247	3.1343	8.81535	2.18712e-08	8.73167e-06	9.48969
ZWINT	3.5961	5.31256	8.81165	2.20214e-08	8.73167e-06	9.4831
PTTG1	2.25459	4.77274	8.80748	2.21919e-08	8.73167e-06	9.47568
TOP2A	2.53576	3.03746	8.79151	2.2858e-08	8.82406e-06	9.44722
FGF14	-1.12235	2.38953	-8.75033	2.46734e-08	9.34848e-06	9.37364
DNAH12	-2.92068	3.32689	-8.71494	2.63531e-08	9.67504e-06	9.31021
KIAA1377	-2.8899	4.12453	-8.71234	2.6481e-08	9.67504e-06	9.30554
TACC1	-1.58002	3.84432	-8.67666	2.83035e-08	1.01595e-05	9.24142
GAS2L3	1.95914	2.93208	8.60979	3.20784e-08	1.11401e-05	9.12073
MEST	2.90745	5.49282	8.60902	3.21246e-08	1.11401e-05	9.11934
POLE2	1.28864	3.94773	8.52178	3.78571e-08	1.27381e-05	8.96093
LCA5L	-2.72874	4.1932	-8.5201	3.79777e-08	1.27381e-05	8.95786
WDR38	-1.69479	2.8474	-8.50352	3.91863e-08	1.29315e-05	8.92762
IL6ST	-1.1355	3.41127	-8.49216	4.00366e-08	1.30024e-05	8.9069
ZHX1-C8orf76	1.42852	3.23348	8.4594	4.25999e-08	1.36187e-05	8.84697
HSPB8	-2.22635	4.40708	-8.42149	4.57785e-08	1.44097e-05	8.77746
SERPINB1	-2.187	6.07162	-8.40509	4.7229e-08	1.44504e-05	8.74732
DBN1	1.65033	4.28128	8.40407	4.73205e-08	1.44504e-05	8.74545
SCN1A	-3.81714	3.38985	-8.38371	4.91913e-08	1.48008e-05	8.70798
SYNE1	-1.63045	2.78101	-8.36348	5.11263e-08	1.51601e-05	8.67069
RMI2	1.08621	2.66071	8.33831	5.36449e-08	1.56796e-05	8.62421
LRRC46	-4.1216	4.64535	-8.32779	5.47355e-08	1.57731e-05	8.60475
LOC101927391	-2.57132	3.77668	-8.318	5.57698e-08	1.58479e-05	8.58664
MEX3A	1.37969	4.07238	8.27765	6.02551e-08	1.65716e-05	8.51182
DNMT3B	1.22323	3.50444	8.26158	6.21451e-08	1.65716e-05	8.48194
CCDC81	-2.82615	4.44726	-8.25578	6.28411e-08	1.65716e-05	8.47117
LAMA2	-1.32717	3.35955	-8.25302	6.31763e-08	1.65716e-05	8.46602
ADGB	-4.90168	4.05193	-8.17768	7.30522e-08	1.89196e-05	8.32543
LOC100507073	-3.31346	5.19495	-8.16212	7.52845e-08	1.9254e-05	8.29628
CES4A	-1.89573	5.33946	-8.14798	7.73736e-08	1.9544e-05	8.26977
DNAH9	-3.25325	3.75552	-8.13181	7.9836e-08	1.99201e-05	8.23942
MEGF11	-1.53127	2.84955	-8.06497	9.09117e-08	2.18824e-05	8.11354
AGBL2	-4.87205	6.14712	-8.05898	9.19786e-08	2.18824e-05	8.10223
ANKFN1	-1.33175	2.67566	-7.99943	1.03321e-07	2.42172e-05	7.98949
RUSC1	1.53245	5.46474	7.99529	1.0416e-07	2.42172e-05	7.98164
CATSPERD	-3.24146	2.80393	-7.97192	1.09039e-07	2.50666e-05	7.93724
AGR3	-5.12206	4.8122	-7.9587	1.11904e-07	2.53284e-05	7.91208
FAM154B	-5.1035	4.58964	-7.9553	1.12653e-07	2.53284e-05	7.90561
CCDC17	-3.92457	5.24543	-7.94746	1.14399e-07	2.54414e-05	7.89068
PRR29	-2.45193	5.36776	-7.93689	1.168e-07	2.5696e-05	7.87053
CFI	-2.375	5.87075	-7.92296	1.20042e-07	2.60686e-05	7.84396
COL21A1	-4.18079	4.17096	-7.91874	1.21042e-07	2.60686e-05	7.83591
NFKBIZ	-2.86458	8.05579	-7.89639	1.26487e-07	2.69358e-05	7.7932
FAS	-1.35838	3.05113	-7.89154	1.27702e-07	2.69358e-05	7.78393
C9orf117	-2.31668	4.58793	-7.87412	1.32166e-07	2.7593e-05	7.75057
RACGAP1	2.6925	4.55052	7.86689	1.34065e-07	2.77068e-05	7.73672
KLHL6	-1.58391	2.75777	-7.84863	1.38991e-07	2.84376e-05	7.70168
KIF2C	1.95395	3.44183	7.80868	1.50427e-07	3.0239e-05	7.62489
KCNRG	-3.31795	3.70377	-7.8076	1.50751e-07	3.0239e-05	7.6228
TTC29	-3.92096	3.60695	-7.79171	1.55577e-07	3.08643e-05	7.59219
REEP1	-3.12201	4.59534	-7.78749	1.56886e-07	3.08643e-05	7.58405
ACSL5	-2.19998	4.7573	-7.7823	1.5851e-07	3.08868e-05	7.57405
AGR2	-3.38833	4.55282	-7.76533	1.63945e-07	3.13203e-05	7.54129
DLGAP5	3.05989	3.16651	7.76471	1.64148e-07	3.13203e-05	7.54009
MAP6	-1.38083	3.2414	-7.76111	1.65327e-07	3.13203e-05	7.53313
C1orf168	-3.51511	4.81665	-7.75624	1.66934e-07	3.13346e-05	7.52373
DDX39A	1.69228	6.3415	7.73955	1.72572e-07	3.19502e-05	7.49145
LRRC71	-2.41299	3.53515	-7.73733	1.73337e-07	3.19502e-05	7.48716
TMED6	-3.90271	3.89115	-7.72122	1.78992e-07	3.26358e-05	7.45595
SPATA18	-2.8358	4.3368	-7.71772	1.80246e-07	3.26358e-05	7.44916
RRAD	-2.72258	3.54682	-7.7055	1.84694e-07	3.31477e-05	7.42547
LRRC48	-1.76967	4.15858	-7.68381	1.92874e-07	3.40568e-05	7.38333
CSTF1	1.18561	3.32417	7.68325	1.93088e-07	3.40568e-05	7.38225
KLK6	2.46151	4.60993	7.67362	1.96842e-07	3.4422e-05	7.36353
ATAD2	1.92251	3.52807	7.65614	2.03851e-07	3.4923e-05	7.32951
FAM179A	-3.78304	5.60066	-7.64873	2.06899e-07	3.4923e-05	7.31508
VNN1	-2.16215	2.98203	-7.63956	2.10738e-07	3.4923e-05	7.29719
FABP5	2.66303	5.89168	7.63745	2.11631e-07	3.4923e-05	7.29308
RSPH9	-2.73116	3.68924	-7.62963	2.14977e-07	3.50228e-05	7.27782
DYNLRB2	-4.9721	4.99076	-7.62462	2.17148e-07	3.50228e-05	7.26805
BUB1B	3.34347	4.95773	7.62405	2.17395e-07	3.50228e-05	7.26694
CDKN1A	-2.7526	5.85387	-7.61854	2.19812e-07	3.51356e-05	7.25619
CTSS	-1.99361	3.73737	-7.6025	2.27012e-07	3.60052e-05	7.22483
MS4A8	-4.22927	4.7163	-7.59686	2.29601e-07	3.61356e-05	7.2138
ALG3	1.6746	4.92754	7.59172	2.31986e-07	3.62323e-05	7.20374
DNAI2	-2.47202	3.31643	-7.58218	2.36483e-07	3.66548e-05	7.18506
TIMELESS	1.15562	2.78443	7.57796	2.38499e-07	3.66894e-05	7.1768
LIMA1	-1.20668	3.84863	-7.57059	2.42063e-07	3.67654e-05	7.16237
RAD51AP1	2.84213	3.91049	7.56952	2.42587e-07	3.67654e-05	7.16026
GSTA3	-2.36305	3.21793	-7.56167	2.46452e-07	3.70766e-05	7.14488
CD74	-1.36397	4.25635	-7.55046	2.52088e-07	3.75225e-05	7.12288
CXorf57	-1.32004	2.09278	-7.5485	2.53084e-07	3.75225e-05	7.11904
WDR66	-1.85762	3.19556	-7.51523	2.70673e-07	3.96646e-05	7.05363
CCDC173	-3.98093	4.7842	-7.51252	2.72159e-07	3.96646e-05	7.0483
MAK	-1.54273	2.53982	-7.49935	2.79505e-07	4.00377e-05	7.02237
WDR96	-1.62129	2.79217	-7.49792	2.80317e-07	4.00377e-05	7.01955
DNAH7	-1.79209	2.9964	-7.49533	2.8179e-07	4.00377e-05	7.01444
MRPS15	1.4377	4.69484	7.4813	2.89912e-07	4.07176e-05	6.98678
STIM2	-1.06839	3.56307	-7.4802	2.90556e-07	4.07176e-05	6.98462
RASSF6	-2.32753	2.93669	-7.43361	3.19366e-07	4.44506e-05	6.89253
LPCAT1	1.76	5.46607	7.4297	3.21921e-07	4.45033e-05	6.88477
PIFO	-3.46431	5.62884	-7.42083	3.27775e-07	4.50085e-05	6.86722
FAM13C	-1.29156	2.35449	-7.40169	3.40796e-07	4.61767e-05	6.82926
ATP2C2	-1.11612	3.33031	-7.37495	3.59889e-07	4.79514e-05	6.77615
C14orf105	-2.54095	2.89457	-7.37395	3.60629e-07	4.79514e-05	6.77414
CCDC11	-2.76744	3.78637	-7.37355	3.60924e-07	4.79514e-05	6.77335
CPEB1	-1.02796	2.06148	-7.34381	3.83528e-07	5.04056e-05	6.71415
SHMT2	1.63541	4.72792	7.3413	3.85498e-07	5.04056e-05	6.70915
KIF11	2.72212	3.54818	7.33908	3.87252e-07	5.04056e-05	6.70473
GAS6-AS1	-1.07077	2.61135	-7.33656	3.89251e-07	5.04056e-05	6.69971
EGR1	-3.19908	7.96012	-7.32269	4.00466e-07	5.14441e-05	6.67202
ABCA8	-1.37753	2.33246	-7.32045	4.023e-07	5.14441e-05	6.66757
CCNB1	2.60133	4.73878	7.28416	4.33377e-07	5.503e-05	6.59502
TCTEX1D1	-4.46883	3.91812	-7.27661	4.40147e-07	5.503e-05	6.5799
FAM64A	1.08018	2.94074	7.27353	4.42941e-07	5.503e-05	6.57373
PDK4	-1.48703	3.04605	-7.27267	4.43725e-07	5.503e-05	6.57201
SGOL2	1.41579	2.82218	7.27033	4.45864e-07	5.503e-05	6.56732
CIART	1.02087	2.99087	7.26673	4.49169e-07	5.503e-05	6.56011
SATB1	-2.20777	4.00394	-7.23611	4.78369e-07	5.79137e-05	6.49869
RCC2	1.21923	7.55924	7.23178	4.82656e-07	5.80891e-05	6.48999
CCNE1	1.48889	3.08395	7.22573	4.88707e-07	5.84733e-05	6.47783
RECQL4	1.85595	3.86933	7.21264	5.02082e-07	5.97244e-05	6.45149
NDC80	2.92981	5.20843	7.20499	5.10061e-07	6.02058e-05	6.43611
MAST4	-1.08122	4.30726	-7.20314	5.12014e-07	6.02058e-05	6.43238
EFCAB1	-1.95739	2.94458	-7.18074	5.36252e-07	6.23393e-05	6.38726
MELK	3.44354	5.75955	7.17655	5.40921e-07	6.25268e-05	6.3788
IMP4	1.1619	4.89644	7.17248	5.45493e-07	6.2701e-05	6.37059
DZIP1L	-2.62294	3.743	-7.12283	6.04557e-07	6.76768e-05	6.27025
C5AR1	-1.38055	2.8239	-7.12201	6.05596e-07	6.76768e-05	6.26858
SNRPB	1.90849	6.61578	7.11631	6.12798e-07	6.76768e-05	6.25704
CAPS2	-2.2521	2.56749	-7.11588	6.13338e-07	6.76768e-05	6.25618
SFRP1	-1.39501	3.00772	-7.10528	6.26995e-07	6.83953e-05	6.23468
FAM24B	1.3449	3.27853	7.10415	6.28461e-07	6.83953e-05	6.2324
TPX2	2.40278	3.12186	7.08606	6.52539e-07	7.06399e-05	6.1957
CCDC147	-1.74716	2.7122	-7.05701	6.93199e-07	7.42558e-05	6.13668
KIF14	1.95361	3.17813	7.0493	7.0443e-07	7.50658e-05	6.12098
SNTN	-5.09818	3.96982	-7.01563	7.5569e-07	7.96981e-05	6.05238
ERICH3	-2.9973	2.92696	-7.00966	7.65182e-07	8.02853e-05	6.04019
PAMR1	-2.4164	4.62788	-7.00062	7.79784e-07	8.13933e-05	6.02173
ETS2	-1.76879	4.15187	-6.99822	7.83699e-07	8.13933e-05	6.01684
RAB36	-1.56152	5.29218	-6.97664	8.19906e-07	8.46066e-05	5.97272
ARHGAP18	-3.09821	5.10442	-6.9732	8.25827e-07	8.46066e-05	5.96569
EFHB	-1.92762	2.5435	-6.97096	8.29712e-07	8.46066e-05	5.9611
TACC3	2.67659	3.51377	6.96234	8.44827e-07	8.54009e-05	5.94347
FAM149A	-2.567	4.02455	-6.96093	8.4733e-07	8.54009e-05	5.94058
ARL4C	1.56778	5.28771	6.95032	8.66395e-07	8.68943e-05	5.91884
PEA15	1.37263	4.94105	6.94489	8.76319e-07	8.74609e-05	5.90771
KIF23	1.8977	2.5132	6.94254	8.80641e-07	8.74656e-05	5.9029
VWA3B	-1.74151	2.54546	-6.9368	8.91314e-07	8.76744e-05	5.89113
HAND2-AS1	-1.0301	1.93901	-6.91901	9.25253e-07	8.98712e-05	5.85461
SLC27A2	-3.83469	3.8769	-6.9182	9.26824e-07	8.98712e-05	5.85296
GGH	3.21096	4.16859	6.90682	9.49284e-07	9.12683e-05	5.82956
NEK5	-3.82078	6.41635	-6.90396	9.55006e-07	9.12683e-05	5.82368
SIDT1	-2.06378	2.38695	-6.89963	9.63747e-07	9.12683e-05	5.81478
C11orf97	-3.95845	3.52913	-6.89904	9.64939e-07	9.12683e-05	5.81357
MCM6	1.12699	3.48805	6.8989	9.65229e-07	9.12683e-05	5.81328
C11orf88	-2.98928	3.78956	-6.89387	9.75493e-07	9.12683e-05	5.80294
DLEC1	-2.99796	4.53997	-6.89318	9.76919e-07	9.12683e-05	5.80151
BABAM1	1.6492	5.62114	6.88411	9.95747e-07	9.26045e-05	5.78285
LRRC10B	-3.70034	4.50528	-6.88176	1.00069e-06	9.26429e-05	5.77802
DNMT3A	1.0345	4.06944	6.87516	1.0147e-06	9.35171e-05	5.76442
C16orf59	1.31237	3.90178	6.86867	1.02868e-06	9.43801e-05	5.75105
FOXM1	2.01705	3.28031	6.86416	1.03851e-06	9.48362e-05	5.74175
FMO3	-1.94552	2.84082	-6.86215	1.04292e-06	9.48362e-05	5.73761
STK33	-2.64456	4.23117	-6.85599	1.05657e-06	9.56523e-05	5.7249
PAFAH1B3	1.3629	4.99692	6.84347	1.08487e-06	9.76394e-05	5.69906
FAM83D	3.43592	3.9556	6.84207	1.08806e-06	9.76394e-05	5.69619
NME5	-2.88145	6.1258	-6.83415	1.10642e-06	9.88527e-05	5.67983
PPFIA4	2.10761	3.34906	6.82826	1.12028e-06	9.96558e-05	5.66766
RGS7BP	-1.76705	2.35154	-6.8245	1.12922e-06	0.000100017	5.65989
BST2	2.56569	6.66935	6.81857	1.14347e-06	0.000100499	5.64762
EME1	1.34605	3.55296	6.81815	1.14449e-06	0.000100499	5.64675
TPPP3	-3.33984	5.82873	-6.80969	1.16515e-06	0.000101876	5.62926
PRSS8	1.72994	3.8434	6.80257	1.18284e-06	0.000102982	5.61453
LRG1	-2.80814	5.27583	-6.79798	1.19441e-06	0.000103549	5.60501
LAGE3	1.75739	4.88165	6.79184	1.21004e-06	0.000104461	5.5923
RFC4	1.97856	5.92365	6.77181	1.26251e-06	0.000107334	5.55079
MORN5	-3.18315	3.94525	-6.77039	1.26632e-06	0.000107334	5.54784
NCAPG	2.06244	2.57178	6.76994	1.26753e-06	0.000107334	5.54691
ACKR4	-2.79215	2.87089	-6.76883	1.27052e-06	0.000107334	5.5446
SERPINA3	-3.77757	5.34628	-6.76556	1.27936e-06	0.000107334	5.53782
MAP3K19	-1.97863	3.63138	-6.76532	1.28003e-06	0.000107334	5.53731
BLM	1.66654	3.84099	6.76252	1.28763e-06	0.000107531	5.53152
CDH6	1.44771	3.08137	6.75384	1.3116e-06	0.000108666	5.51348
ARHGAP44	-1.57982	3.92478	-6.75375	1.31186e-06	0.000108666	5.51329
FAM81B	-4.85078	5.47279	-6.75107	1.31933e-06	0.000108845	5.50773
C1orf192	-3.74552	4.72943	-6.73739	1.35824e-06	0.000111321	5.47931
TUBA4B	-3.44093	5.56842	-6.7367	1.36023e-06	0.000111321	5.47788
CEP55	2.93714	2.99522	6.73054	1.37817e-06	0.00011234	5.46505
C1orf194	-2.59832	3.85765	-6.70543	1.45383e-06	0.000117222	5.41277
KLF2	-1.46953	5.30013	-6.70497	1.45525e-06	0.000117222	5.41182
PRIMA1	2.04707	6.0921	6.70308	1.46113e-06	0.000117234	5.40788
RGS22	-3.00716	4.25435	-6.70102	1.46756e-06	0.00011729	5.40358
SLC39A4	2.45444	5.04073	6.69486	1.48692e-06	0.000117916	5.39076
EFHC2	-1.50675	3.22578	-6.69079	1.4999e-06	0.000118486	5.38226
RPL39L	1.84415	2.96543	6.68457	1.51992e-06	0.000119606	5.36929
DNAH5	-2.6288	4.01848	-6.67426	1.55371e-06	0.000121797	5.34777
SPC24	1.0867	3.56675	6.66636	1.58014e-06	0.00012308	5.33127
KLK8	1.03309	3.45866	6.66577	1.58211e-06	0.00012308	5.33005
MYBL2	1.9067	3.74499	6.65673	1.61298e-06	0.000124534	5.31114
RSPH1	-3.83378	7.95123	-6.65259	1.62728e-06	0.000125166	5.3025
LRRC36	-1.66273	4.37645	-6.64815	1.6428e-06	0.000125886	5.29322
BIRC3	-2.96362	4.28522	-6.64306	1.66077e-06	0.000126789	5.28257
DPYD	-1.19668	2.27151	-6.63992	1.67198e-06	0.00012717	5.27599
TMEM45B	-2.28959	4.06901	-6.6187	1.74965e-06	0.000132095	5.23155
SPAG5	1.48159	3.08023	6.60999	1.78259e-06	0.000134088	5.2133
MARCKSL1	2.27151	7.09544	6.60395	1.80582e-06	0.000135337	5.20063
C4orf22	-2.82782	2.5744	-6.60031	1.81994e-06	0.000135897	5.19301
TEKT3	-2.92929	3.03214	-6.5871	1.87224e-06	0.000138488	5.16528
ZNF204P	-2.39928	4.23024	-6.58643	1.87493e-06	0.000138488	5.16387
ODF3B	-1.00422	3.04337	-6.57289	1.93021e-06	0.000141486	5.13543
KRT8	1.42452	6.91625	6.5693	1.94518e-06	0.000141486	5.12787
OR7E37P	1.32322	6.36758	6.56846	1.94866e-06	0.000141486	5.12612
VWA3A	-1.38141	4.27698	-6.56559	1.96072e-06	0.000141486	5.12008
KLF4	-2.22025	4.94673	-6.56483	1.96393e-06	0.000141486	5.11848
CAPSL	-4.32651	6.32121	-6.54689	2.04114e-06	0.000145511	5.08073
PPP1R36	-3.00789	5.24911	-6.53966	2.07314e-06	0.000147279	5.0655
CNPY2	1.2685	4.66763	6.53746	2.08297e-06	0.000147465	5.06087
TK1	1.13501	3.50705	6.52905	2.12103e-06	0.000149128	5.04315
TEKT1	-3.50699	4.01747	-6.52383	2.14498e-06	0.000150296	5.03215
PTPRN2	-1.01166	2.40697	-6.51957	2.16476e-06	0.000151164	5.02317
EGR3	-4.65621	5.92963	-6.51273	2.19688e-06	0.000152885	5.00875
FBXO15	-3.45788	5.39799	-6.50229	2.24689e-06	0.000154786	4.98671
CDKN2A	1.52904	2.83738	6.48969	2.30883e-06	0.000158519	4.96008
LITAF	-1.53862	4.54492	-6.48802	2.31714e-06	0.000158557	4.95657
NMU	3.48105	4.46182	6.48414	2.33663e-06	0.000158829	4.94837
SLC22A4	-2.89249	3.5796	-6.4791	2.36222e-06	0.000160037	4.9377
PSRC1	2.15783	4.52113	6.46464	2.43717e-06	0.000164569	4.90711
PFKM	1.46281	5.71036	6.46217	2.45022e-06	0.000164906	4.90189
DYDC2	-3.34872	4.13934	-6.45746	2.47529e-06	0.000166047	4.89192
CCDC114	-3.26275	7.29126	-6.45113	2.50939e-06	0.000167785	4.87852
CKS2	2.67222	5.12634	6.43936	2.57413e-06	0.000170996	4.85357
TMEM232	-1.75278	2.22706	-6.43613	2.59216e-06	0.000171131	4.84674
SCIN	-1.07759	2.07549	-6.436	2.5929e-06	0.000171131	4.84646
SCO2	-2.41627	7.36555	-6.42483	2.65642e-06	0.00017476	4.82275
SAC3D1	2.35428	4.59789	6.41669	2.70365e-06	0.000177297	4.8055
CSPG5	1.09831	3.11517	6.40544	2.7704e-06	0.000179027	4.78161
CCDC3	2.41909	6.11438	6.40488	2.77378e-06	0.000179027	4.78042
ARMC3	-4.01649	5.75463	-6.39691	2.82219e-06	0.000181551	4.76347
C5orf49	-2.6615	2.8604	-6.3935	2.84311e-06	0.000181551	4.75624
TROAP	1.09632	3.14663	6.39329	2.84442e-06	0.000181551	4.75578
C1orf87	-2.29981	2.9369	-6.39191	2.85297e-06	0.000181551	4.75284
SPDL1	1.56648	4.00868	6.39051	2.86162e-06	0.000181551	4.74988
RIIAD1	-3.10632	3.89497	-6.38979	2.86613e-06	0.000181551	4.74834
PCAT6	2.07199	3.3773	6.38206	2.9146e-06	0.000184052	4.73191
HSPA4L	-1.78253	2.44004	-6.37966	2.92983e-06	0.000184444	4.7268
CCDC69	-1.35394	2.18633	-6.37671	2.94871e-06	0.000185063	4.72051
ZMAT1	-1.35511	3.44004	-6.37091	2.98609e-06	0.000186836	4.70817
DSERG1	-1.7941	4.07763	-6.36926	2.99684e-06	0.000186937	4.70465
EPB41L3	-1.95314	2.56947	-6.36033	3.05554e-06	0.00019002	4.68565
GPI	1.71566	5.6812	6.35261	3.1073e-06	0.000192652	4.6692
PDRG1	1.19944	5.25237	6.34968	3.12717e-06	0.000192769	4.66295
PCDP1	-1.54025	3.26427	-6.34847	3.13544e-06	0.000192769	4.66037
SPAG8	-1.96953	3.71681	-6.34817	3.13744e-06	0.000192769	4.65974
KLK7	2.40483	4.8944	6.34621	3.15085e-06	0.000193013	4.65556
LXN	-2.57745	5.05787	-6.32904	3.27094e-06	0.000199166	4.61892
GIMAP7	-1.29158	2.09996	-6.3277	3.2805e-06	0.000199166	4.61606
CWH43	-3.30567	3.28723	-6.31419	3.37849e-06	0.000203306	4.58723
TNNT1	3.34785	4.77974	6.30053	3.48068e-06	0.000207959	4.55803
PIH1D3	-3.00364	2.9785	-6.29946	3.48878e-06	0.000207959	4.55575
STX10	1.42954	4.24761	6.29104	3.55356e-06	0.000210742	4.53773
ANXA13	-3.71228	4.42112	-6.28113	3.63126e-06	0.000214727	4.51653
RAD54L	2.33744	3.82997	6.25452	3.84881e-06	0.00022499	4.45952
SLC44A2	1.60701	4.51859	6.24604	3.92093e-06	0.00022854	4.44133
WDR49	-2.37257	2.737	-6.24476	3.93186e-06	0.00022854	4.4386
KIF21A	-2.39873	5.11931	-6.23951	3.97734e-06	0.000230528	4.42733
KRT7	1.14479	3.27459	6.22625	4.09461e-06	0.000234666	4.39886
ENKUR	-2.83266	4.519	-6.21137	4.23039e-06	0.00024177	4.36689
HENMT1	1.93987	3.82275	6.20753	4.26613e-06	0.000243134	4.35864
SCRIB	1.61867	7.3238	6.19494	4.38562e-06	0.000248274	4.33157
FEN1	1.07445	4.23041	6.1942	4.39273e-06	0.000248274	4.32998
NEK10	-1.82963	2.98758	-6.19162	4.41769e-06	0.000248997	4.32443
ROMO1	1.21899	6.0044	6.18986	4.43487e-06	0.000249058	4.32063
ARMC2	-2.48381	3.3046	-6.18901	4.44312e-06	0.000249058	4.31881
SAPCD2	1.45673	4.84606	6.18372	4.495e-06	0.000251278	4.30743
CDCA5	1.77183	3.43452	6.16529	4.6809e-06	0.00025961	4.26771
ATP8B1	-1.30494	6.8046	-6.16522	4.68161e-06	0.00025961	4.26756
COL23A1	2.01511	3.79458	6.16517	4.68211e-06	0.00025961	4.26746
SOX12	1.17738	3.12501	6.1628	4.7066e-06	0.000260262	4.26234
AJUBA	1.45063	3.67764	6.16044	4.73106e-06	0.00026091	4.25726
AK1	-1.7339	4.31521	-6.15613	4.77608e-06	0.000262685	4.24798
ADRB2	-1.50103	2.56155	-6.14315	4.91453e-06	0.000269574	4.21997
AKAP14	-1.72847	2.04788	-6.13475	5.00626e-06	0.000273872	4.20185
DNAI1	-1.33335	3.71166	-6.13311	5.02446e-06	0.000274135	4.19829
KIF15	2.44936	3.0671	6.13012	5.05758e-06	0.000275058	4.19185
TMEM147	1.49889	5.5968	6.10561	5.33846e-06	0.000288192	4.13887
ZFP36	-2.20362	6.91241	-6.10257	5.37439e-06	0.000289045	4.1323
SPAG6	-2.46759	2.86874	-6.10189	5.38252e-06	0.000289045	4.13081
TMEM173	-1.8503	5.19266	-6.10028	5.40161e-06	0.000289311	4.12734
ENPP2	-2.3287	4.07779	-6.09863	5.42131e-06	0.000289608	4.12378
C8orf82	2.03271	4.91641	6.0972	5.4385e-06	0.00028977	4.12067
HJURP	2.0127	2.60325	6.0928	5.4915e-06	0.000291755	4.11117
THBS3	1.37153	5.52234	6.08623	5.57181e-06	0.000293813	4.09693
EIF1	-1.21543	6.12018	-6.08103	5.63615e-06	0.000296268	4.08568
MAL	3.74911	5.32464	6.07939	5.65667e-06	0.000296268	4.08212
MYCL	2.133	3.3896	6.07898	5.66181e-06	0.000296268	4.08123
KNSTRN	1.16911	3.09618	6.07335	5.73259e-06	0.000298445	4.06905
CDC20	3.2892	4.39978	6.05462	5.97514e-06	0.000310282	4.02842
TMEM41A	1.1395	4.31844	6.05053	6.02937e-06	0.000312246	4.01957
DNA2	1.16368	4.14603	6.04948	6.04348e-06	0.000312246	4.01728
CHTF18	2.10443	4.45042	6.04596	6.09063e-06	0.000313101	4.00966
MAPK10	-1.12076	2.85828	-6.04328	6.127e-06	0.000314182	4.00382
EFEMP1	-1.98691	2.9508	-6.03806	6.1982e-06	0.00031546	3.99249
LAMC1	1.38941	6.19179	6.02203	6.42227e-06	0.000324444	3.95768
ZNF516	-1.60729	3.51838	-6.02024	6.44771e-06	0.000324632	3.9538
MCM2	1.96116	5.87728	6.01954	6.45774e-06	0.000324632	3.95228
PACRG	-1.44069	2.8195	-6.01115	6.579e-06	0.000329133	3.93404
PCDH19	1.63611	4.4761	6.01023	6.59242e-06	0.000329133	3.93204
C6orf118	-1.37771	2.05763	-5.9969	6.79033e-06	0.000335967	3.90304
SHC2	-1.54659	4.39168	-5.99638	6.79816e-06	0.000335967	3.90191
COLCA2	-2.76655	4.42256	-5.98632	6.95174e-06	0.000341905	3.88001
PCAT19	-2.87934	3.96651	-5.98252	7.01066e-06	0.000343976	3.87173
OGN	-1.88445	2.63036	-5.97288	7.1625e-06	0.000348916	3.85073
CDK1	1.67862	3.15359	5.96676	7.26054e-06	0.000352016	3.8374
UBXN10	-2.11492	4.69235	-5.9604	7.36391e-06	0.0003545	3.82354
SPAG17	-3.24901	5.08734	-5.96014	7.36824e-06	0.0003545	3.82296
CD83	-2.52651	6.44963	-5.95935	7.3811e-06	0.0003545	3.82125
NDUFB9	1.82251	7.52711	5.94831	7.56459e-06	0.00036218	3.79717
MLLT3	-1.29167	3.40676	-5.94761	7.5764e-06	0.00036218	3.79564
ENC1	1.74273	4.71849	5.94446	7.62973e-06	0.000362579	3.78877
NEK1	-1.2349	3.31475	-5.94202	7.67134e-06	0.000363323	3.78343
ELL2	-1.13	2.60422	-5.93447	7.80137e-06	0.000367779	3.76695
C22orf23	-1.57825	2.3485	-5.93179	7.84813e-06	0.000369133	3.76109
PLAC8	-2.84398	3.40033	-5.92525	7.9632e-06	0.000372504	3.74682
CABLES2	1.55061	4.86024	5.92284	8.00615e-06	0.000372504	3.74155
NR4A2	-2.76354	6.31784	-5.92257	8.01083e-06	0.000372504	3.74097
ANLN	2.02811	2.48635	5.915	8.14715e-06	0.000377984	3.72443
SLC6A8	1.63809	4.45595	5.90419	8.34603e-06	0.000386334	3.70078
DEFB124	-1.12595	3.96594	-5.88395	8.73161e-06	0.000400558	3.6565
ARHGEF26-AS1	-2.2795	2.86251	-5.8796	8.81687e-06	0.000403564	3.64697
NDNF	-2.60045	4.04041	-5.87689	8.87039e-06	0.000405048	3.64103
NR4A3	-1.29322	2.71229	-5.87596	8.88888e-06	0.000405048	3.63899
KIFC2	1.88403	4.36611	5.87095	8.9889e-06	0.000407789	3.62802
CORO2B	-1.79262	3.43077	-5.86683	9.07198e-06	0.000408886	3.619
LRRK2	-1.0508	2.16153	-5.86678	9.07304e-06	0.000408886	3.61888
ARHGAP32	-1.29832	3.68693	-5.85791	9.25479e-06	0.000413434	3.59944
BIRC5 /// EPR-1	1.2457	2.58307	5.8567	9.27985e-06	0.000413651	3.59678
CC2D2A	-1.13044	2.59433	-5.85041	9.41125e-06	0.000417047	3.583
C9orf72	-1.86166	3.81703	-5.84858	9.4498e-06	0.000417047	3.57899
LOC101928817	-1.91044	2.74335	-5.8482	9.45796e-06	0.000417047	3.57814
EP300-AS1	-3.12412	3.76393	-5.83056	9.83874e-06	0.000430129	3.53944
PAX8-AS1	-1.37664	3.09354	-5.82325	1.0001e-05	0.000434439	3.52339
CCDC96	-3.09573	4.78202	-5.81593	1.01664e-05	0.000440316	3.50731
KIAA0319	-1.98032	3.05355	-5.81536	1.01794e-05	0.000440316	3.50606
C5orf34	1.62136	3.04288	5.80698	1.03724e-05	0.000447719	3.48764
IL33	-2.09009	2.49137	-5.79966	1.05441e-05	0.000453217	3.47154
TDRP	-1.5256	4.95354	-5.79491	1.0657e-05	0.000456659	3.4611
SORBS2	-1.07542	3.2262	-5.7944	1.06692e-05	0.000456659	3.45997
EPHB2	1.08238	3.21216	5.78666	1.08561e-05	0.00046274	3.44295
CDCA8	1.61079	4.10858	5.77624	1.1113e-05	0.00047125	3.42001
OSBPL2	1.42737	4.97581	5.77515	1.11403e-05	0.00047125	3.41761
PLG	-1.46786	2.84326	-5.77417	1.11646e-05	0.00047125	3.41547
RTN1	-2.15394	3.61822	-5.77392	1.11709e-05	0.00047125	3.41492
POLR2J	1.1144	4.60668	5.7729	1.11966e-05	0.000471362	3.41266
TSGA10	-1.85139	3.37234	-5.77149	1.12322e-05	0.000471889	3.40955
SLC28A3	-2.06436	4.16855	-5.76683	1.13504e-05	0.000474907	3.39928
MAMDC2	-2.0657	2.91651	-5.74847	1.18285e-05	0.000489899	3.35883
LTBP2	1.31705	4.90362	5.74501	1.19208e-05	0.000492725	3.3512
CHEK2	1.36689	3.70115	5.7405	1.20424e-05	0.000494778	3.34124
KCNMB2	-1.57267	2.60505	-5.74049	1.20427e-05	0.000494778	3.34122
PZP	-1.60714	3.21785	-5.74009	1.20535e-05	0.000494778	3.34034
EFHC1	-1.83394	6.01612	-5.73689	1.21405e-05	0.000496788	3.33329
CCL4	-1.56011	4.09833	-5.73404	1.22186e-05	0.000497994	3.327
C9orf135	-2.97729	3.78607	-5.7273	1.24053e-05	0.000503597	3.31213
CTHRC1	3.87112	4.75062	5.70675	1.29929e-05	0.000524327	3.26675
PRICKLE2	-1.84431	4.23641	-5.70291	1.31058e-05	0.000525407	3.25826
ITPA	1.12396	6.3759	5.70235	1.31223e-05	0.000525407	3.25703
SLC25A25	-1.72506	4.43181	-5.6988	1.32277e-05	0.000528593	3.24918
CYB5D1	-1.90668	5.12622	-5.69459	1.3354e-05	0.000532597	3.23987
TSPYL5	1.8135	5.35511	5.69058	1.34751e-05	0.000536383	3.23101
PTP4A1	-1.17887	3.87898	-5.68923	1.35163e-05	0.000536977	3.22802
PRAME	2.50617	3.74268	5.68302	1.37068e-05	0.000542441	3.21429
DDIAS	1.13312	3.36444	5.67842	1.38497e-05	0.000545153	3.20413
DNMBP	-1.26345	5.01589	-5.67824	1.38553e-05	0.000545153	3.20373
CTGF	-3.00823	6.04392	-5.67586	1.39301e-05	0.000547044	3.19845
PRRX1	-1.08998	2.9497	-5.67414	1.39843e-05	0.000548121	3.19464
CENPU	1.23337	2.6554	5.65157	1.47151e-05	0.000573469	3.14469
GUCY1A2	-1.44381	2.7708	-5.65071	1.47438e-05	0.000573493	3.14278
IL15RA	-1.67387	3.32947	-5.64907	1.47986e-05	0.000574535	3.13914
G0S2	-2.31455	5.23412	-5.64215	1.50317e-05	0.000581379	3.12381
RBCK1	1.04233	5.20779	5.63759	1.51874e-05	0.000585187	3.11371
RSPH4A	-2.83013	2.95413	-5.63182	1.5387e-05	0.000588444	3.10091
NCAPH	1.26154	2.85344	5.62841	1.55059e-05	0.00059163	3.09336
SLC27A6	-3.13964	4.95018	-5.62627	1.55812e-05	0.000592551	3.0886
FAM110C	-1.92799	6.24899	-5.62013	1.57994e-05	0.000599304	3.07497
DUXAP10	3.25944	3.43676	5.61962	1.58174e-05	0.000599304	3.07385
AIF1L	1.59709	4.34558	5.61184	1.60985e-05	0.000606368	3.05658
ZNF783	1.14901	5.94695	5.6107	1.614e-05	0.000606368	3.05406
MCM7	1.91403	5.23334	5.61037	1.6152e-05	0.000606368	3.05332
PRR18	-2.45103	3.39468	-5.60069	1.651e-05	0.000617541	3.03183
SQRDL	-1.91323	5.3568	-5.59902	1.65727e-05	0.000618755	3.02811
MAN2A1	-1.63423	4.86522	-5.59052	1.68946e-05	0.000626203	3.00925
FAM162A	1.0623	4.70396	5.58547	1.7089e-05	0.000629985	2.99803
SLC4A3	1.4131	3.23791	5.58326	1.71749e-05	0.000630557	2.99311
TMEM39B	1.0803	3.57592	5.58282	1.7192e-05	0.000630557	2.99214
IFNGR1	-1.53536	5.25863	-5.56866	1.77529e-05	0.000646305	2.96066
NINL	1.96263	5.00677	5.56692	1.7823e-05	0.000647707	2.95679
DZIP3	-1.64484	4.51717	-5.56241	1.80066e-05	0.000653219	2.94674
NELL2	-4.41821	6.15441	-5.55948	1.81266e-05	0.000656406	2.94023
TRIM22	-2.01722	5.16568	-5.55759	1.82042e-05	0.000658054	2.93604
TMEM231	-2.60054	6.22395	-5.55011	1.85161e-05	0.000666971	2.91938
GLDC	2.60246	4.09518	5.53923	1.89791e-05	0.000680057	2.89516
SKA3	1.11807	3.32622	5.53831	1.90189e-05	0.000680291	2.89311
SPEF2	-1.40108	3.9065	-5.53068	1.93512e-05	0.000686178	2.87613
CCDC19	-3.05251	5.08454	-5.52799	1.947e-05	0.000688009	2.87012
IL7	-2.0314	2.10904	-5.52236	1.97208e-05	0.000695667	2.85758
PCK2	1.0517	3.94971	5.51506	2.00508e-05	0.000704879	2.8413
PET100	1.3222	5.27694	5.50341	2.05888e-05	0.000720138	2.81534
TNFAIP8L1	-2.42923	5.83238	-5.50034	2.07333e-05	0.000722664	2.80848
LOC728196	-1.58398	3.54769	-5.49476	2.09982e-05	0.00072635	2.79603
MSH3	-1.0347	3.26679	-5.49461	2.10056e-05	0.00072635	2.79569
IL1B	-1.49272	4.93742	-5.49438	2.10166e-05	0.00072635	2.79518
CCDC37	-1.09637	2.43536	-5.49357	2.10551e-05	0.000726455	2.79338
CDK4	1.62717	4.53779	5.49056	2.12e-05	0.000728997	2.78666
EBP	1.01402	4.20199	5.48557	2.14421e-05	0.000732398	2.77552
WDR86-AS1	-2.20284	2.55971	-5.47936	2.17473e-05	0.000741584	2.76166
DGAT1	1.75298	4.55714	5.47244	2.20928e-05	0.000749617	2.74621
SPA17	-2.86583	5.32601	-5.47085	2.21731e-05	0.000751096	2.74266
VPS72	1.2994	6.04632	5.46927	2.22528e-05	0.000752548	2.73914
WDR63	-2.45942	2.77205	-5.45703	2.28824e-05	0.000770431	2.71178
SLC52A2	1.83411	4.23123	5.4568	2.28945e-05	0.000770431	2.71126
LZTS3	1.93462	6.43867	5.45125	2.3186e-05	0.000777681	2.69886
C11orf83	1.31399	5.20918	5.44986	2.32597e-05	0.000778876	2.69575
BAIAP3	-1.01098	4.20701	-5.44692	2.34161e-05	0.000782834	2.68918
SMIM5	-1.41355	5.37016	-5.44509	2.35141e-05	0.000784826	2.68508
FANCG	1.15903	5.13288	5.44136	2.37148e-05	0.000790235	2.67675
CDCA4	1.10275	4.28137	5.43616	2.3998e-05	0.000798372	2.66511
APH1B	-1.20053	4.44609	-5.42836	2.44289e-05	0.000808761	2.64767
CSE1L	1.6326	6.34606	5.42366	2.46922e-05	0.000816157	2.63716
MDH1B	-1.91978	4.76986	-5.42	2.48995e-05	0.000820932	2.62896
IFT88	-1.59447	6.37302	-5.4197	2.49168e-05	0.000820932	2.62828
CCDC181	-2.02648	3.42914	-5.41483	2.51953e-05	0.000826116	2.61738
DUSP14	-1.13513	4.21718	-5.41211	2.53524e-05	0.000828869	2.61129
PIM3	-1.26575	7.07245	-5.4106	2.54397e-05	0.000828869	2.60791
PAK3	-1.929	3.41829	-5.41057	2.54413e-05	0.000828869	2.60785
HLA-DRB1 /// HLA-DRB1	-2.12822	8.30271	-5.40794	2.55948e-05	0.000831222	2.60196
SLC44A3	-1.93021	3.18477	-5.40287	2.58932e-05	0.00083825	2.59059
AKR1C3	-2.9602	5.61613	-5.39764	2.62041e-05	0.000846977	2.57889
EFEMP2	1.59032	5.1119	5.38122	2.72067e-05	0.000876614	2.54208
SLITRK5	-2.05255	2.55332	-5.37731	2.74514e-05	0.000883107	2.53331
IGFBP7	-1.61918	6.66942	-5.36339	2.83394e-05	0.000905249	2.5021
TPBG	-1.15736	3.72387	-5.36305	2.83616e-05	0.000905249	2.50133
ZFAS1	1.01825	5.17969	5.363	2.83647e-05	0.000905249	2.50122
STIL	1.57625	5.01422	5.36238	2.84052e-05	0.000905249	2.49983
CPNE1	1.34181	5.22294	5.35741	2.873e-05	0.000913643	2.48868
NUDT1	1.49993	3.53629	5.3566	2.87836e-05	0.000913643	2.48685
WDR52	-2.08173	5.46856	-5.35631	2.88025e-05	0.000913643	2.48621
DRC1	-2.11117	4.30291	-5.34914	2.9279e-05	0.000926265	2.47013
C2orf50	-2.15625	3.26048	-5.3485	2.93226e-05	0.000926265	2.46867
TTLL6	-1.85275	2.62551	-5.34829	2.93363e-05	0.000926265	2.46821
MFAP2	2.52947	4.09508	5.33983	2.99103e-05	0.000941483	2.44922
C6orf165	-2.32604	4.34085	-5.33119	3.05087e-05	0.000958845	2.4298
RNASEH2A	1.64799	3.40119	5.32614	3.08639e-05	0.000967036	2.41845
RBM20	-2.56951	2.75027	-5.32375	3.10332e-05	0.000970855	2.41309
C4orf47	-2.23385	4.10107	-5.32254	3.11196e-05	0.000972073	2.41036
PMS2P1	1.10532	5.85466	5.31919	3.13593e-05	0.000976578	2.40284
CCDC176	-1.1154	4.4667	-5.31514	3.16517e-05	0.000982691	2.39375
XPR1	1.24251	5.33403	5.3122	3.1866e-05	0.000986351	2.38713
L1CAM	1.55614	2.93339	5.30999	3.20279e-05	0.000988052	2.38216
ZNF273	-1.57933	4.44522	-5.3097	3.20497e-05	0.000988052	2.3815
CENPW	1.3625	3.95271	5.30948	3.20658e-05	0.000988052	2.38101
SMIM14	-1.15948	4.10178	-5.30848	3.21391e-05	0.00098882	2.37877
LCA5	-1.51249	2.75764	-5.30181	3.26346e-05	0.000998409	2.36377
NCBP2-AS2	1.69956	4.68279	5.30127	3.26755e-05	0.000998409	2.36255
C8orf34	-1.87076	2.52292	-5.30101	3.26947e-05	0.000998409	2.36197
AMPD3	-2.12155	5.62894	-5.29896	3.28486e-05	0.00100161	2.35737
KNTC1	1.52859	3.38757	5.29077	3.34725e-05	0.00101539	2.33893
CNTN3	-4.17928	4.88079	-5.29001	3.35308e-05	0.00101539	2.33722
C2orf73	-1.04028	3.08947	-5.28978	3.35486e-05	0.00101539	2.3367
PFDN2	1.2945	5.63589	5.28782	3.36995e-05	0.0010165	2.3323
MAP3K8	-1.67572	4.70364	-5.27221	3.49297e-05	0.00104789	2.29716
NSUN5P1	1.32715	6.02078	5.25632	3.62292e-05	0.00108054	2.26136
PFKFB3	-1.42185	7.36207	-5.25043	3.67232e-05	0.00109209	2.24809
SERPINA6	-1.74283	3.22896	-5.24888	3.68538e-05	0.00109279	2.24461
RORC	-1.01625	4.81364	-5.244	3.727e-05	0.00110118	2.23361
NDC1	1.09063	4.58613	5.24367	3.72982e-05	0.00110118	2.23287
LRRC34	-2.29667	2.93426	-5.24206	3.7437e-05	0.0011021	2.22923
POLR2H	1.01872	7.92569	5.23656	3.79132e-05	0.00111152	2.21684
SYNGR3	1.73345	2.65808	5.2329	3.82338e-05	0.0011166	2.20859
FAM46A	-1.41146	4.46085	-5.23264	3.82569e-05	0.0011166	2.208
DNAH2	-1.39204	3.89549	-5.23129	3.83757e-05	0.00111847	2.20496
GCNT3	-1.49543	3.82111	-5.22797	3.86705e-05	0.00112546	2.19746
NUP62CL	-1.34402	2.41931	-5.22465	3.8967e-05	0.00113248	2.18997
IL7R	-1.74278	4.07656	-5.21809	3.95595e-05	0.00114807	2.17519
DUSP1	-1.16536	5.16067	-5.21686	3.96716e-05	0.00114969	2.17241
SYT17	1.3164	6.00065	5.21263	4.00599e-05	0.0011593	2.16287
CEP72	1.24801	2.96899	5.21089	4.02213e-05	0.00116069	2.15893
TUBG1	1.39447	3.88761	5.20906	4.03912e-05	0.00116395	2.1548
HLA-DPA1	-2.20505	5.84045	-5.20646	4.06331e-05	0.00116927	2.14895
COX6B1	1.57586	7.41654	5.20489	4.07809e-05	0.00117095	2.14539
TEX9	-1.00554	2.21671	-5.20355	4.09068e-05	0.0011722	2.14237
F3	-2.35023	5.45705	-5.18699	4.24984e-05	0.00121465	2.10497
SHCBP1	1.05465	1.56592	5.1869	4.25067e-05	0.00121465	2.10478
NRG3	-2.16265	3.75212	-5.1858	4.26147e-05	0.00121603	2.10229
C11orf70	-2.06017	3.20555	-5.18336	4.28556e-05	0.00121951	2.09677
MIS18A	1.23897	3.6053	5.17783	4.34054e-05	0.00123344	2.08428
ARMC4	-1.30199	3.05635	-5.17156	4.40372e-05	0.00124966	2.07012
SNRPF	1.0632	6.24505	5.17066	4.41292e-05	0.00125053	2.06808
SLMO1	1.55526	2.69266	5.16686	4.45175e-05	0.00125979	2.05949
PTDSS1	1.47365	6.58297	5.16328	4.48869e-05	0.00126849	2.0514
CCDC153	-2.63828	4.73045	-5.16138	4.50834e-05	0.00127228	2.04712
LRFN5	-2.02312	3.0123	-5.15489	4.57634e-05	0.00128615	2.03245
DTHD1	-2.07815	2.5766	-5.15147	4.6127e-05	0.00129459	2.0247
HMGN5	-1.0458	2.47482	-5.14761	4.65394e-05	0.00130438	2.01598
IGSF9	1.5046	3.70067	5.14468	4.68555e-05	0.00130715	2.00935
MCTP2	-1.21233	4.26677	-5.14446	4.68788e-05	0.00130715	2.00886
LINC00176	1.56114	2.75476	5.14373	4.69577e-05	0.00130715	2.00722
KIAA0101	1.38923	4.01553	5.14245	4.70967e-05	0.00130924	2.00432
CELF2	-1.0003	3.18955	-5.14178	4.71696e-05	0.00130948	2.0028
MLF2	1.34799	5.25419	5.13721	4.76703e-05	0.00132017	1.99246
SCARNA15	1.42689	5.91322	5.13709	4.76836e-05	0.00132017	1.99219
SPATS1	-1.5104	3.12393	-5.13226	4.82191e-05	0.00133139	1.98125
ADCYAP1R1	-1.22324	2.95701	-5.12711	4.87953e-05	0.00134007	1.96961
CYP1B1	-1.36683	3.74855	-5.11492	5.019e-05	0.00137468	1.94201
LPAR1	-1.02141	3.1252	-5.11146	5.05929e-05	0.00138202	1.93417
C10orf2	1.36613	5.32589	5.10335	5.155e-05	0.00140441	1.91582
MRPL9	1.23553	6.08636	5.07234	5.53845e-05	0.00148515	1.84555
C15orf65	-1.53448	2.65994	-5.06952	5.57467e-05	0.00148907	1.83916
DHCR7	1.28401	3.69119	5.06894	5.5822e-05	0.00148907	1.83784
KCNJ2	-3.05439	4.753	-5.0605	5.69235e-05	0.00151254	1.81871
CRIP1	1.89107	6.03921	5.05894	5.71295e-05	0.00151604	1.81517
SGMS2	-1.38877	3.35369	-5.05604	5.75142e-05	0.0015223	1.8086
NME1	1.6349	5.47582	5.05487	5.76711e-05	0.00152448	1.80593
VAX2	1.16092	2.55866	5.05251	5.79872e-05	0.00153086	1.80057
LRRC49	-1.74676	5.01263	-5.05019	5.82998e-05	0.00153691	1.79531
C1GALT1	-1.07247	4.14173	-5.04969	5.83666e-05	0.00153691	1.79419
CXCL3	-2.90892	4.28147	-5.03845	5.99068e-05	0.00156738	1.76868
IDH3B	1.50311	5.67214	5.03617	6.02244e-05	0.00157167	1.76351
RASD1	-2.5935	7.1624	-5.02958	6.11518e-05	0.00158565	1.74854
HLA-DPB1	-1.52904	4.00512	-5.02819	6.13482e-05	0.00158565	1.7454
GNGT1	1.37279	2.13548	5.02688	6.15349e-05	0.00158565	1.74243
SPOCK2	1.07666	4.41132	5.01907	6.26595e-05	0.00160452	1.72469
MYO10	1.44937	3.55059	5.01377	6.34351e-05	0.00161939	1.71265
GPSM2	1.0573	2.84899	5.01348	6.34775e-05	0.00161939	1.712
CPEB4	-1.2169	4.34412	-5.01234	6.36459e-05	0.00162166	1.7094
CARD6	-1.29791	4.43392	-5.01082	6.38707e-05	0.00162537	1.70595
CDCA2	1.09433	2.70605	5.00784	6.4314e-05	0.00163259	1.69918
UMODL1	-1.82163	2.49506	-5.00466	6.47891e-05	0.00164058	1.69197
LOC100996457	-1.97221	4.38563	-4.99803	6.57948e-05	0.00165932	1.67689
ROPN1L	-2.01324	3.03587	-4.99764	6.58538e-05	0.00165932	1.67601
ANKRD45	-1.52304	2.42906	-4.99692	6.59637e-05	0.00166005	1.67438
FOS	-3.12991	8.24098	-4.9957	6.61505e-05	0.0016627	1.67161
ZNF23	-1.8071	5.67521	-4.99371	6.64572e-05	0.00166836	1.66708
TMC5	-1.90891	3.54817	-4.98662	6.75596e-05	0.00169189	1.65098
CBX7	-1.39341	5.32681	-4.98598	6.76606e-05	0.00169234	1.64952
PTGER4	-1.0982	3.63497	-4.98408	6.79598e-05	0.00169775	1.6452
DSC2	1.43762	4.16772	4.97929	6.87191e-05	0.00171045	1.63432
YBX1	1.1356	5.61403	4.97734	6.90315e-05	0.00171406	1.62988
DCUN1D2	1.46154	4.93515	4.97167	6.99462e-05	0.00173352	1.61699
APOA1BP	1.3503	5.85426	4.97091	7.00695e-05	0.00173352	1.61527
VEGFA	1.10091	4.45494	4.96679	7.07437e-05	0.00173968	1.6059
IER3	-1.80757	9.39785	-4.96435	7.1146e-05	0.0017423	1.60035
DCXR	1.12382	4.24437	4.96392	7.12173e-05	0.0017423	1.59937
SFN	1.94459	6.03611	4.96374	7.12477e-05	0.0017423	1.59895
LOC101927719	-1.69814	2.26771	-4.96336	7.13103e-05	0.0017423	1.59809
CDKN3	1.02676	1.96673	4.96052	7.17824e-05	0.0017461	1.59163
RIBC1	-1.06452	3.31426	-4.96006	7.18582e-05	0.0017461	1.5906
EYA1	-1.57398	3.06539	-4.95856	7.21102e-05	0.00174807	1.58717
NAA10	1.21869	5.13262	4.94414	7.45676e-05	0.00180124	1.55437
SLC38A1	1.05503	5.05953	4.94325	7.47223e-05	0.00180136	1.55234
C1orf85	1.33114	3.18593	4.94038	7.52226e-05	0.00181065	1.54581
AMIGO2	-2.47125	6.00037	-4.93979	7.5325e-05	0.00181099	1.54448
OVGP1	-3.92068	6.74517	-4.9367	7.58679e-05	0.0018219	1.53745
MEOX1	3.39379	3.45378	4.92861	7.73086e-05	0.00185215	1.51904
KIF5C	2.40017	4.68067	4.9274	7.75263e-05	0.00185302	1.51629
PTH2R	3.19686	3.3152	4.92421	7.81046e-05	0.00186249	1.50902
HRASLS	1.58531	3.10362	4.92223	7.84649e-05	0.00186891	1.50451
PMAIP1	-2.04833	4.2663	-4.92138	7.86206e-05	0.00187044	1.50257
TMSB10	1.31503	9.68863	4.91917	7.90251e-05	0.0018757	1.49755
VSIG10L	1.23172	2.21757	4.91571	7.96645e-05	0.00188432	1.48966
FRAT2	1.10127	4.25606	4.91425	7.99364e-05	0.00188639	1.48633
KLHL13	-1.7837	3.01748	-4.9114	8.04681e-05	0.00189239	1.47984
TRIM55	-1.77512	2.57702	-4.90818	8.10733e-05	0.00189756	1.47251
LOC101927416	-1.46975	2.79679	-4.90765	8.11734e-05	0.00189756	1.4713
ITM2A	-1.55438	3.0763	-4.90582	8.15191e-05	0.00189964	1.46714
CMSS1	1.06414	4.56102	4.90103	8.24336e-05	0.00191441	1.45623
ANO8	1.01792	3.06883	4.8974	8.31322e-05	0.00192295	1.44797
LEPREL4	1.15858	4.27577	4.89706	8.31981e-05	0.00192295	1.4472
SMC4	1.42282	4.27172	4.89632	8.33415e-05	0.00192295	1.44551
GATA6	-1.28243	4.42168	-4.89628	8.33506e-05	0.00192295	1.4454
DYNLT1	-1.43526	8.17136	-4.8962	8.33653e-05	0.00192295	1.44523
BARD1	1.12538	3.86126	4.89413	8.37685e-05	0.0019279	1.44051
PSAT1	1.3808	4.10487	4.88632	8.53062e-05	0.00195669	1.42271
FAM216B	-2.99728	3.45354	-4.88524	8.55203e-05	0.0019594	1.42026
MITF	-1.04479	2.98785	-4.88319	8.59288e-05	0.00196656	1.4156
SFRP4	-2.70153	4.77855	-4.87955	8.66614e-05	0.00197449	1.40729
FHOD3	-2.28151	3.76764	-4.87612	8.73564e-05	0.00198349	1.39948
FOSB	-4.24866	6.78938	-4.8733	8.79329e-05	0.00198943	1.39304
RBM28	1.04245	6.03702	4.86702	8.92288e-05	0.00201503	1.37873
POC1A	1.05831	3.0252	4.86414	8.9828e-05	0.00202187	1.37218
WDR78	-1.82834	3.89468	-4.86342	8.99808e-05	0.00202309	1.37052
FRY	-1.23741	3.37979	-4.86004	9.06922e-05	0.00203684	1.36281
TNFAIP8L3	-1.08407	2.16659	-4.85869	9.09781e-05	0.00204102	1.35974
ACBD6	1.06294	5.14708	4.85287	9.22191e-05	0.00206358	1.34648
STOML3	-2.68132	2.71614	-4.85225	9.23529e-05	0.00206358	1.34506
C7orf57	-3.35606	3.66954	-4.85209	9.23873e-05	0.00206358	1.3447
PITPNA-AS1	1.06145	3.90869	4.84658	9.35811e-05	0.00207665	1.33214
MGAT4B	1.44292	5.29137	4.84549	9.38201e-05	0.00207969	1.32965
FAM166B	-1.07013	3.57716	-4.84211	9.45617e-05	0.00209289	1.32194
ADH6	-1.24774	2.38474	-4.84079	9.48539e-05	0.0020958	1.31893
LRRTM1	2.22384	4.13647	4.83958	9.51231e-05	0.00209948	1.31615
C1orf158	-1.45223	2.38363	-4.83692	9.57136e-05	0.00210688	1.3101
PLEKHG4	1.40634	4.54751	4.83488	9.61709e-05	0.00211282	1.30544
FANK1	-2.16846	6.8428	-4.83397	9.6375e-05	0.00211282	1.30336
CHCHD7	1.24345	5.02586	4.83339	9.65055e-05	0.00211282	1.30204
LMNB1	1.79868	4.33361	4.83272	9.66562e-05	0.00211282	1.30052
SRD5A2	-1.2273	2.58455	-4.83227	9.67567e-05	0.00211282	1.2995
HOXA3	-1.4547	3.47795	-4.82895	9.75105e-05	0.0021191	1.29191
C19orf53	1.29663	5.67631	4.82627	9.81214e-05	0.00212666	1.2858
F5	-1.90032	2.62031	-4.82316	9.88354e-05	0.0021376	1.27871
FAAH2	-1.27757	4.93693	-4.81771	0.0001001	0.00215583	1.26628
LOC145474	-1.1854	5.05881	-4.81109	0.00010166	0.00217958	1.25115
PCNA	1.85283	5.70627	4.80926	0.000102095	0.002185	1.24698
CTPS1	1.63231	4.31008	4.80371	0.000103426	0.00220657	1.2343
GBP3	-2.35883	5.31685	-4.80166	0.000103921	0.00221144	1.22964
C1orf216	1.58978	4.88258	4.80089	0.000104108	0.00221144	1.22788
UBL4A	1.47183	5.31166	4.80054	0.000104195	0.00221144	1.22707
NCBP2	1.41133	5.37182	4.79886	0.000104603	0.0022155	1.22324
HMMR	1.77567	2.96401	4.7976	0.000104911	0.00221974	1.22036
OPLAH	2.16556	3.28986	4.79282	0.00010609	0.00224236	1.20944
C4BPA	-1.82254	4.82128	-4.79095	0.000106554	0.00224752	1.20517
LHX4-AS1	1.25815	3.9764	4.78498	0.00010805	0.00227438	1.19154
RAB11FIP1	-1.04772	4.38637	-4.78402	0.000108292	0.0022764	1.18936
MRGBP	1.02449	4.24383	4.78328	0.000108479	0.0022764	1.18766
GBA3	-1.49559	2.39288	-4.78167	0.000108886	0.00228026	1.184
NOV	1.13314	2.79204	4.77793	0.000109844	0.00229346	1.17544
BDH2	-1.23305	4.87049	-4.77789	0.000109853	0.00229346	1.17536
TTC18	-2.09985	4.90498	-4.77237	0.000111279	0.00231614	1.16275
PXDN	1.52556	6.38351	4.77159	0.000111482	0.00231768	1.16096
CECR1	-1.66506	6.57555	-4.76886	0.000112195	0.00231908	1.15474
CNTRL	-1.53354	4.07589	-4.76653	0.000112807	0.00232899	1.14942
GNE	-1.38611	4.23271	-4.76604	0.000112938	0.00232935	1.14828
USP43	-1.99893	4.49391	-4.7605	0.000114407	0.00234852	1.13564
C17orf96	1.22492	3.76459	4.75859	0.000114921	0.00235348	1.13127
TIGD1	1.99071	3.69387	4.75698	0.000115354	0.00235778	1.12759
DNAAF3	-1.7826	4.92623	-4.75247	0.000116575	0.00237563	1.11729
CD97	-1.37027	5.29178	-4.7482	0.000117746	0.00239472	1.10752
IFT46	-1.50473	4.94721	-4.74215	0.000119423	0.00242541	1.0937
HMGB3	1.31394	5.53218	4.73656	0.000120995	0.0024462	1.08092
C15orf26	-1.27914	2.04998	-4.73306	0.000121989	0.00245875	1.07292
PRELID1	1.21527	4.95269	4.73237	0.000122184	0.00245875	1.07136
NAMPT	-1.87701	4.71715	-4.72896	0.000123163	0.00247536	1.06356
SOX4	1.19234	5.33932	4.72766	0.000123539	0.00247804	1.06058
AGPAT9	-2.00336	3.50296	-4.7253	0.000124221	0.00248929	1.0552
TNFAIP3	-1.86577	6.63391	-4.72116	0.000125431	0.00250863	1.04572
MRPS21	1.01185	7.73731	4.71887	0.000126105	0.00251897	1.04048
APOBEC4	-1.27044	1.93858	-4.70969	0.000128844	0.00255937	1.01949
RRAGD	-2.55791	4.53712	-4.70818	0.000129298	0.0025659	1.01605
SLC40A1	-1.82389	6.49986	-4.70607	0.000129938	0.00257262	1.01122
RBM24	-3.01196	5.03645	-4.69974	0.000131878	0.00260195	0.996746
KIAA1407	-1.64529	4.25226	-4.69894	0.000132124	0.0026043	0.994922
EFCAB2	-1.58444	4.02738	-4.69439	0.00013354	0.00262203	0.984509
HOXA5	-2.04035	4.12483	-4.6922	0.000134226	0.00262762	0.9795
GNL2	1.16498	6.81058	4.69098	0.000134609	0.00262762	0.976716
SYNE4	1.97926	4.16016	4.69063	0.00013472	0.00262762	0.97591
ODF2L	-1.16014	3.20874	-4.68923	0.000135162	0.00262959	0.972707
LRRC8D	1.04052	5.93861	4.68909	0.000135206	0.00262959	0.972388
RILPL2	-1.45593	5.01992	-4.68712	0.000135832	0.00263601	0.967879
EVA1C	-2.05403	8.39862	-4.6822	0.000137405	0.0026572	0.956625
JUNB	-1.68343	5.23605	-4.68061	0.000137917	0.00266458	0.952992
KPTN	1.02283	3.43576	4.67328	0.000140305	0.00270561	0.93622
FSD1L	-1.35582	2.76316	-4.67102	0.000141051	0.00271299	0.931039
PDHA1	1.29078	6.2678	4.67063	0.000141181	0.00271299	0.930143
RBL2	-1.10639	5.81196	-4.67053	0.000141214	0.00271299	0.929914
BTG2	-1.63224	5.15091	-4.67051	0.000141219	0.00271299	0.929882
LOC727916	-1.23587	1.95395	-4.66812	0.000142011	0.0027231	0.924414
FAM32A	1.04895	5.49241	4.66627	0.000142629	0.00272729	0.92017
AK9	-1.19128	2.80978	-4.66374	0.000143478	0.0027342	0.914377
FN1	1.75363	4.18486	4.66359	0.000143526	0.0027342	0.914051
PPP2R2B	-1.31769	3.26391	-4.65856	0.000145228	0.00275638	0.90253
SRPX	-2.26218	3.71031	-4.65735	0.000145639	0.00276162	0.899769
C11orf16	-1.24909	4.28904	-4.65695	0.000145776	0.00276164	0.898854
LAMA5	1.62971	6.42845	4.64978	0.000148248	0.00279553	0.88243
FJX1	1.16556	4.52464	4.64863	0.000148647	0.00280047	0.879803
STC2	1.2009	3.49439	4.64237	0.000150843	0.00283402	0.865479
LSM10	1.06836	2.96212	4.63949	0.000151864	0.00284807	0.858888
PUS7	1.34339	6.07672	4.63948	0.000151869	0.00284807	0.858856
C12orf55	-2.01154	2.54887	-4.6333	0.000154086	0.00288435	0.844703
C7orf63	-1.61504	5.57982	-4.62908	0.000155616	0.00290602	0.835055
BCL7C	1.09171	4.01043	4.62854	0.000155812	0.00290602	0.833825
RRM2	2.83878	4.86568	4.62367	0.000157604	0.00292876	0.822658
SMIM6	-1.30888	2.68009	-4.62026	0.000158869	0.0029452	0.814851
SRD5A1	1.25462	4.21562	4.61784	0.000159773	0.00295833	0.809307
SMG5	1.01826	5.45185	4.61704	0.000160072	0.00296119	0.80748
CDS1	-1.45904	4.579	-4.61556	0.000160628	0.0029688	0.804093
KLK5	1.22883	2.74885	4.60463	0.000164798	0.00302352	0.779068
ZBTB21	-1.32168	5.10907	-4.60206	0.000165795	0.00303685	0.773181
LYSMD2	-1.33757	3.76583	-4.6013	0.000166091	0.00303956	0.771437
SASS6	1.03568	4.34936	4.59913	0.000166939	0.00304962	0.766466
CDC25B	1.3868	4.78425	4.59791	0.000167418	0.00305312	0.763668
KCNJ16	-1.34931	3.19524	-4.59788	0.000167429	0.00305312	0.763604
PBK	2.61108	2.51145	4.59036	0.000170407	0.00309913	0.746392
CXorf30	-2.21767	3.90695	-4.58867	0.000171086	0.00310872	0.74251
PPFIBP1	1.02273	3.76226	4.58251	0.000173578	0.00314283	0.728394
PDLIM1	-1.26627	8.10258	-4.58154	0.000173971	0.00314717	0.726185
TEKT2	-2.60219	5.66932	-4.58103	0.000174179	0.00314816	0.725016
LAMTOR4	1.2376	4.92124	4.57718	0.000175761	0.00316584	0.71619
FZD7	1.57667	3.65636	4.57714	0.000175777	0.00316584	0.716105
ERP27	-3.24808	6.97119	-4.56418	0.000181204	0.0032436	0.686422
ZWILCH	1.0582	3.89312	4.56253	0.00018191	0.00325339	0.682626
STC1	-1.3737	3.77196	-4.56019	0.000182909	0.00326555	0.67728
ATP10D	-1.66032	3.51286	-4.55829	0.000183728	0.0032773	0.672923
ANXA5	-1.37278	7.73383	-4.55668	0.000184424	0.00328564	0.669231
SLIRP	1.0954	7.39049	4.55435	0.000185438	0.00329918	0.663881
NCR3LG1 /// RP1-239B22.5	-1.24018	2.76089	-4.55258	0.000186209	0.00330715	0.65983
DPP6	-1.09332	3.10833	-4.54884	0.000187849	0.00332762	0.65127
C17orf97	-1.61403	5.19093	-4.54764	0.000188382	0.00333417	0.648505
GNAS-AS1	1.50221	2.90555	4.5468	0.000188753	0.00333785	0.646585
ALK	1.47652	2.90428	4.54138	0.000191169	0.00336891	0.634176
NELFCD	1.22773	5.53301	4.54096	0.000191359	0.00336937	0.633205
CCDC135	-1.07671	2.629	-4.53847	0.000192479	0.00337745	0.627513
C1orf106	1.42084	6.60159	4.53329	0.000194835	0.00341587	0.615641
ZNF623	1.30877	4.92987	4.53225	0.000195313	0.00342132	0.613249
IRF8	-1.21769	4.8118	-4.52614	0.000198135	0.00346186	0.599251
TOMM40L	1.04511	2.48461	4.52465	0.000198832	0.00347108	0.595823
C14orf132	-1.5434	4.7333	-4.52385	0.000199205	0.0034718	0.593995
MEF2C	-1.20923	3.65655	-4.52151	0.000200304	0.00348785	0.588626
CDC7	2.14444	3.56157	4.51383	0.00020395	0.00354228	0.57103
CYP2C8	-1.23488	2.68042	-4.51344	0.000204137	0.00354253	0.570135
SOD2	-2.3716	4.8584	-4.51163	0.000205004	0.00355456	0.566001
GYS1	1.03932	4.71605	4.51095	0.000205336	0.00355693	0.564423
HLA-DMA	-1.77569	5.78483	-4.50804	0.000206742	0.00357561	0.557763
C11orf96	-3.1332	7.84285	-4.5068	0.000207344	0.00357831	0.554927
MEIG1	-1.62218	4.31624	-4.49758	0.000211888	0.00363389	0.533779
FBXO45	1.28563	4.14702	4.49605	0.000212651	0.00364392	0.530273
INTU	-2.77486	5.57089	-4.49116	0.000215108	0.00367958	0.51907
MPDZ	-1.361	5.05868	-4.49084	0.000215272	0.00367958	0.518326
MAF1	1.15968	4.68099	4.48687	0.000217289	0.00370786	0.50923
LRRC23	-1.67486	2.96073	-4.48624	0.000217609	0.00371023	0.507794
COL28A1	-1.61959	2.67824	-4.48115	0.000220231	0.00375181	0.496112
HLA-DRA	-2.04972	5.0027	-4.47786	0.000221938	0.00376904	0.488582
GALM	-1.26695	4.59058	-4.47778	0.000221979	0.00376904	0.488402
SALL4	1.4929	3.73574	4.46915	0.000226531	0.0038336	0.468605
DPH2	1.14078	4.91334	4.46835	0.000226956	0.00383762	0.466778
CHODL	1.85051	3.37198	4.46718	0.00022758	0.00384439	0.464102
LOC100507535	1.10076	4.47045	4.46679	0.000227788	0.00384439	0.46321
SLC4A11	1.28441	3.82223	4.46335	0.00022964	0.00386702	0.455316
SS18L1	1.82888	6.74596	4.46253	0.000230081	0.00386854	0.453445
CTSA	1.23921	5.74242	4.45992	0.000231501	0.00388239	0.447442
ZMYND10	-1.79751	3.63968	-4.45322	0.000235177	0.00393436	0.432082
ARSD	-1.0197	3.80481	-4.44995	0.000236989	0.00395175	0.424599
CCDC60	-1.02194	3.7024	-4.44825	0.000237938	0.00396435	0.420701
PJA2	-1.43139	4.60347	-4.44738	0.000238428	0.00396441	0.418697
TPD52L2	1.24637	5.46209	4.44707	0.000238603	0.00396441	0.417983
TCF7L1	1.69114	2.61672	4.44686	0.000238717	0.00396441	0.417515
ZC2HC1A	-1.03403	3.62687	-4.44595	0.000239232	0.00396974	0.415415
DDAH2	1.43216	5.34567	4.44421	0.00024021	0.00398274	0.411437
SLC31A2	-1.08819	3.1367	-4.44348	0.000240626	0.00398641	0.409749
CYSTM1	-1.39761	6.3934	-4.44032	0.000242419	0.00400315	0.402512
GTF2IRD1	1.11175	4.73197	4.42715	0.000250048	0.00411584	0.372307
GPATCH1	1.28903	5.04884	4.42237	0.000252874	0.00415901	0.361353
CRISPLD1	-2.65894	4.56983	-4.42118	0.000253585	0.00416066	0.35862
C9orf116	-1.31651	3.0634	-4.41542	0.000257042	0.00420054	0.345422
NUP155	1.64013	2.87019	4.41297	0.000258531	0.00421487	0.33979
MB	-1.07369	3.60664	-4.41296	0.000258537	0.00421487	0.339769
BCO2	-1.95967	3.6352	-4.41045	0.000260065	0.00423112	0.334026
SLC39A7	1.14483	4.02179	4.40915	0.000260861	0.00423588	0.331049
HSD17B10	1.30193	7.20677	4.40705	0.000262158	0.00424626	0.326216
CCP110	-1.17708	3.98501	-4.40677	0.00026233	0.00424626	0.325574
C12orf73	1.03216	4.46368	4.40577	0.000262946	0.00425287	0.323288
PRSS12	-1.31434	2.30315	-4.40125	0.000265761	0.00428485	0.312912
MRPL36	1.14126	5.86464	4.40054	0.000266201	0.00428856	0.311301
ZNF239	1.00805	4.43958	4.39943	0.000266899	0.00429643	0.308747
SYT13	1.07386	3.03849	4.39891	0.000267224	0.00429827	0.307564
MRPL34	1.55699	3.16256	4.39803	0.000267782	0.00430387	0.305529
KCNE1	-1.12579	2.22266	-4.39269	0.000271165	0.00435139	0.293299
DUSP2	-2.34127	5.52461	-4.38617	0.000275356	0.00441174	0.278352
CCS	1.37641	5.00261	4.37871	0.000280238	0.00447593	0.261232
DNAJB14	-1.37943	4.01762	-4.37195	0.000284729	0.00452999	0.245742
COL8A1	1.08353	1.94189	4.37124	0.000285206	0.00453052	0.244113
TMEM47	-1.36103	5.10378	-4.36498	0.000289445	0.00457047	0.22974
LOC646736	-1.81912	3.11297	-4.36488	0.000289508	0.00457047	0.229531
ATIC	1.12073	5.13971	4.35946	0.000293227	0.00462205	0.217098
ZNF738	1.07446	4.61962	4.35901	0.000293538	0.0046234	0.216063
TSNAXIP1	-1.5479	4.26434	-4.35857	0.000293845	0.00462466	0.215047
SOAT1	-1.65379	3.50846	-4.35445	0.000296706	0.00465895	0.205608
MGLL	-1.33803	5.64288	-4.3539	0.000297094	0.00466146	0.204335
SRGN	-1.12327	3.64198	-4.35307	0.000297676	0.00466344	0.20243
ADAM28	-1.27038	3.27677	-4.3518	0.000298566	0.00467023	0.199523
LDLRAD3	1.50564	6.23516	4.35049	0.000299485	0.00468102	0.196531
DAW1	-1.91143	2.53575	-4.34952	0.00030017	0.00468815	0.194305
BTBD1	-1.0658	7.16371	-4.34864	0.000300794	0.00469431	0.192283
FAM221A	-1.68098	4.79755	-4.34721	0.000301812	0.00470417	0.188992
ESRP1	1.19664	5.53912	4.34199	0.000305543	0.00475077	0.177026
TRAF3IP1	-1.2224	5.14504	-4.34195	0.000305573	0.00475077	0.176932
FREM2	-1.2431	1.9344	-4.33955	0.0003073	0.00477038	0.171442
COL4A1	1.31745	4.38444	4.33251	0.000312435	0.00482645	0.155305
LRMP	-1.01245	2.77999	-4.32901	0.000315022	0.00486074	0.147279
CCDC77	1.70481	2.92374	4.32799	0.000315783	0.00486515	0.144929
KRI1	1.00517	3.63672	4.32573	0.000317465	0.00488371	0.139755
LRFN1	1.40235	3.65783	4.32443	0.000318439	0.00489501	0.136773
LOC100630918	1.1829	4.34462	4.32202	0.000320256	0.00491131	0.131234
S100A4	2.52094	5.45377	4.32175	0.000320459	0.00491131	0.130616
ARF3	1.05057	4.81008	4.32019	0.000321634	0.00491458	0.127055
ADAMTS1	-1.72129	6.04276	-4.31839	0.000323006	0.00493142	0.122909
VWA5A	-1.42512	4.22158	-4.31709	0.000323997	0.00493962	0.119929
CXCL12	-1.18024	3.57766	-4.3085	0.000330618	0.00502287	0.100235
CD320	1.08081	4.26406	4.30841	0.000330685	0.00502287	0.100038
CIRBP	-1.07558	6.52943	-4.30457	0.000333689	0.0050535	0.0912347
THEM6	1.2177	2.99584	4.30359	0.00033446	0.00506143	0.0889885
FAM127A	1.00758	6.07201	4.3029	0.000335005	0.00506592	0.0874052
PLA2G4A	-2.0766	3.53258	-4.30074	0.000336712	0.00508799	0.0824561
ZNF512B	1.15809	4.26887	4.29922	0.00033792	0.00509331	0.0789715
FAM229B	-1.15326	3.09052	-4.2953	0.000341054	0.00512333	0.0699861
HHAT	-1.49044	4.66582	-4.28865	0.000346443	0.00517766	0.0547299
VCAM1	-2.68032	5.72972	-4.27962	0.000353892	0.00526197	0.0340282
SCUBE2	-1.47134	3.15048	-4.27697	0.000356109	0.00528615	0.02795
SLC2A1	1.15917	3.46564	4.27102	0.000361135	0.00534501	0.0143129
LYRM1	-1.09493	6.72446	-4.26978	0.000362187	0.00535146	0.0114828
CTC-338M12.4	1.25213	3.81591	4.26428	0.000366915	0.00540084	-0.00113321
GID8	1.03769	5.79734	4.25792	0.000372453	0.00545873	-0.0157078
LSG1	1.05367	5.32149	4.25484	0.00037517	0.00548284	-0.0227787
UNG	1.5193	3.79117	4.25283	0.000376948	0.00550097	-0.0273781
CACNA1D	-1.00662	3.18936	-4.25041	0.000379109	0.00552415	-0.0329368
RASGEF1A	1.17126	3.11524	4.24846	0.000380849	0.00553421	-0.0373922
C16orf93	-1.52672	3.35236	-4.24692	0.000382236	0.00554664	-0.0409268
SESN1	-1.21263	4.96985	-4.24691	0.000382246	0.00554664	-0.0409546
IQUB	-1.02749	2.24501	-4.24627	0.000382823	0.00554956	-0.0424217
ACTL6A	1.56063	4.66687	4.24608	0.00038299	0.00554956	-0.0428459
IP6K2	1.12976	6.21058	4.24529	0.000383707	0.00555602	-0.0446647
CCDC78	-1.34302	2.51981	-4.24108	0.000387534	0.00559559	-0.0543175
ALS2CR12	-1.4118	2.67521	-4.23965	0.000388838	0.00561045	-0.0575824
CEBPD	-1.29308	5.09178	-4.2372	0.000391091	0.00561918	-0.0632018
MUC16	2.37186	6.17222	4.23419	0.000393874	0.00564728	-0.0700991
TIMM10	1.17886	5.84536	4.23336	0.000394648	0.00565441	-0.0720075
PER2	-1.05611	3.6831	-4.23033	0.000397473	0.00568692	-0.078944
ATHL1	2.04496	5.92369	4.22744	0.000400191	0.00571152	-0.08557
MRPL15	1.48533	5.90689	4.22732	0.000400309	0.00571152	-0.0858568
SH3RF3	-1.24983	4.42682	-4.22494	0.000402553	0.00573154	-0.091292
NUCB2	-1.67781	4.95374	-4.22311	0.0004043	0.00574931	-0.0955038
TMTC2	-1.16977	3.39075	-4.22304	0.000404363	0.00574931	-0.0956547
TMEM190	-2.65425	5.21417	-4.21957	0.000407685	0.00579103	-0.10361
CTSO	-2.07797	4.81807	-4.21837	0.000408841	0.00579687	-0.106363
CEP76	1.11879	3.42863	4.21764	0.000409541	0.00579877	-0.108028
TPI1	1.16484	4.77893	4.21357	0.000413493	0.0058305	-0.117363
SLCO5A1	-1.1278	2.20021	-4.20679	0.000420153	0.00591627	-0.132899
MKI67	1.08185	3.2164	4.20584	0.000421094	0.00592339	-0.135074
RFX3	-1.4741	3.93451	-4.20569	0.000421238	0.00592339	-0.135406
TCFL5	1.02927	4.0697	4.2045	0.000422425	0.005936	-0.13814
SST	1.73829	2.5265	4.20206	0.000424861	0.00596204	-0.14373
TET1	1.05012	2.59329	4.20132	0.000425601	0.00596834	-0.145423
COPG2IT1	2.0029	3.70757	4.19579	0.000431187	0.00603013	-0.158096
EIF6	1.26538	4.70404	4.19127	0.000435803	0.00607807	-0.168447
TIPARP	-1.72221	5.64711	-4.19065	0.000436439	0.00608279	-0.169863
TSTA3	1.77045	5.71521	4.18643	0.000440801	0.00612941	-0.179529
MX2	2.06397	5.38791	4.18093	0.000446558	0.00618342	-0.192141
TMEM200A	-1.85826	4.30627	-4.18081	0.000446681	0.00618342	-0.192407
PPP1R13L	1.34747	3.91519	4.17894	0.000448658	0.00620659	-0.1967
CSRNP1	-1.87559	5.11036	-4.17833	0.000449294	0.00621119	-0.198076
LRGUK	-1.32103	3.06773	-4.17797	0.000449678	0.0062123	-0.198905
CYP3A5	-1.80181	3.50208	-4.17154	0.000456552	0.0062776	-0.213648
TOPBP1	1.21042	5.55759	4.17115	0.000456971	0.00627877	-0.214539
DHTKD1	1.22362	4.36204	4.17089	0.000457251	0.00627877	-0.215134
PUF60	1.37328	5.77838	4.1691	0.00045918	0.0062977	-0.219224
RAD21	1.35102	5.65329	4.16773	0.000460665	0.0063033	-0.222361
ZNF300P1	-1.11228	2.45038	-4.16739	0.000461038	0.0063033	-0.223147
PPIH	1.2058	5.84133	4.16678	0.000461702	0.0063033	-0.224547
POLE	1.18619	3.69861	4.16668	0.000461811	0.0063033	-0.224774
GZMA	-1.52783	2.95779	-4.16345	0.000465342	0.00633459	-0.232175
GOLGA2P5	-1.09319	4.42691	-4.16278	0.000466069	0.00633497	-0.233692
S100A2	2.86528	3.9566	4.16257	0.000466298	0.00633497	-0.23417
B4GALT5	1.05325	6.25008	4.16012	0.000469009	0.00636334	-0.239801
TTC16	-1.07152	2.39667	-4.15215	0.000477901	0.00644783	-0.258047
MYL6B	1.58416	4.85324	4.1481	0.000482477	0.00648586	-0.267303
C6orf136	1.16685	4.02175	4.1457	0.000485216	0.00651507	-0.272802
FIGN	1.55468	3.00137	4.14564	0.000485287	0.00651507	-0.272943
ATF3	-1.60375	4.73163	-4.1423	0.000489127	0.00655372	-0.280599
C8orf59	1.015	4.64181	4.14114	0.000490463	0.00656303	-0.283249
RPP40	1.35588	4.47141	4.13666	0.000495669	0.00662403	-0.293503
GTF2H4	1.40918	3.25949	4.13145	0.000501795	0.00668389	-0.305433
IGFBP2	2.45402	3.69048	4.12565	0.000508699	0.00676537	-0.318702
SLC18B1	-1.30214	5.63578	-4.12258	0.000512391	0.00679865	-0.325723
APOD	-1.39786	2.76601	-4.11124	0.000526277	0.00695352	-0.351685
EFCAB12	-1.20259	1.98054	-4.11111	0.000526442	0.00695352	-0.351989
FASTKD5	1.11601	4.72658	4.10885	0.000529251	0.00698611	-0.357154
ERICH5	-1.34791	2.91599	-4.10381	0.000535573	0.00705885	-0.368682
AR	-1.48998	5.1083	-4.10117	0.000538916	0.00708626	-0.374722
C10orf107	-1.51934	2.15624	-4.10066	0.000539564	0.00709023	-0.375889
DUSP4	-1.17954	3.37193	-4.09966	0.000540834	0.00710235	-0.378171
DOCK3	1.20354	2.20433	4.09762	0.000543441	0.00712744	-0.382838
PNPT1	1.406	5.36535	4.0967	0.000544623	0.00713796	-0.384947
CHCHD10	1.51235	4.36215	4.09362	0.000548596	0.00717206	-0.392002
NARS2	1.10207	4.4184	4.09327	0.000549048	0.00717339	-0.3928
GSAP	-1.71217	6.56663	-4.09207	0.000550606	0.00718605	-0.39555
SPATA4	-1.35513	2.77249	-4.09188	0.000550852	0.00718605	-0.395985
CETN2	-1.92542	7.80176	-4.08517	0.000559629	0.00728835	-0.411325
KIAA0556	-1.27897	5.59164	-4.0809	0.000565288	0.00735269	-0.421088
CKS1B	1.67336	6.63374	4.0751	0.000573067	0.00741616	-0.43435
IFI16	-1.20613	7.42723	-4.07365	0.000575034	0.00743221	-0.437675
SPATA17	-1.3734	3.20567	-4.07205	0.000577212	0.00744625	-0.441342
RASGRP1	-2.08273	4.46555	-4.0648	0.000587159	0.00754602	-0.457918
LOC100507557	-1.14912	2.30223	-4.06236	0.000590535	0.00757989	-0.463481
ABCA5	-1.21242	3.79587	-4.06036	0.000593331	0.00760624	-0.468064
SUSD4	1.2773	2.87236	4.05888	0.0005954	0.00762389	-0.47144
KLRG2	1.25721	3.08622	4.05734	0.000597573	0.00763669	-0.474973
TRIM28	1.21936	5.54041	4.05354	0.000602951	0.00769101	-0.483663
ERRFI1	-1.61404	7.91289	-4.04865	0.000609939	0.00775597	-0.494841
GBP2	-1.16016	4.54239	-4.04271	0.000618529	0.00783113	-0.508404
KCNK5	1.05222	4.10129	4.04208	0.000619456	0.00783778	-0.509855
SPARCL1	-2.64067	7.71933	-4.0399	0.000622636	0.00784913	-0.514821
KLHL32	-1.34693	1.70696	-4.03784	0.000625667	0.00787279	-0.51953
NSUN5	1.09182	6.25004	4.03555	0.000629054	0.00790568	-0.524766
GPR137C	1.41264	1.78383	4.0352	0.000629582	0.00790746	-0.525579
IER5L	1.05188	4.43157	4.03397	0.000631401	0.00791572	-0.528376
PPP1R14B	1.59616	5.54785	4.03326	0.000632462	0.00792417	-0.530004
CDCA7L	1.70798	6.33616	4.03087	0.000636034	0.00795918	-0.535465
MMS19	1.03485	3.87839	4.027	0.000641863	0.00799663	-0.54431
FAM195A	1.30704	4.83509	4.02697	0.000641904	0.00799663	-0.544372
ANKRD27	1.74104	5.99797	4.02631	0.000642909	0.00800116	-0.545888
TAF1D	1.02701	6.4261	4.02578	0.00064371	0.00800627	-0.547096
CNGA1	-1.19154	2.9952	-4.02061	0.000651601	0.00807986	-0.558908
STX2	-1.05059	3.61318	-4.01942	0.000653434	0.00809458	-0.56163
ARHGEF6	-1.25946	3.81146	-4.0132	0.000663069	0.00818652	-0.57582
MAD2L2	1.32355	3.04804	4.01033	0.000667573	0.00822308	-0.582381
DYX1C1	-1.58808	3.81042	-4.00956	0.000668781	0.008233	-0.584133
KLKB1	-1.63837	3.62418	-4.0068	0.000673151	0.00827685	-0.590447
TRIT1	1.19746	6.38242	4.00635	0.000673863	0.00828062	-0.591471
FLJ22184	1.39879	3.28299	4.00495	0.000676097	0.00830308	-0.594678
MCRS1	1.01558	3.31766	4.0035	0.000678407	0.00832646	-0.597984
ZNF250	1.07177	2.89082	4.00204	0.000680744	0.00834962	-0.601318
KAT2B	-1.59589	4.16253	-4.00138	0.000681798	0.00835304	-0.602816
MRPS17	1.24402	5.22845	3.99971	0.000684487	0.00838097	-0.606631
TLCD2	-1.66637	4.17357	-3.99625	0.000690092	0.0084395	-0.614534
FGF9	1.73441	4.32155	3.99389	0.000693943	0.00847646	-0.619926
MAP9	-1.12907	3.18812	-3.98709	0.00070514	0.00858337	-0.635437
LOC388780	-1.49624	4.12388	-3.98477	0.000709016	0.00861941	-0.640747
SGK1	-1.8024	7.26842	-3.98378	0.000710664	0.00863432	-0.642997
AKR1B1	1.02696	5.36523	3.97983	0.000717313	0.0086996	-0.652018
AQP9	-1.08909	3.491	-3.97657	0.000722845	0.00874078	-0.65946
EZR	-1.29467	4.80029	-3.96836	0.000736964	0.00884875	-0.678198
PREB	1.17973	4.40449	3.96492	0.000742955	0.00891337	-0.68604
LOC284513	1.15415	4.49798	3.96477	0.000743216	0.00891337	-0.686381
LRP2BP	-1.51473	2.86904	-3.96218	0.000747764	0.00895217	-0.692289
LPGAT1	-1.16317	4.84538	-3.96142	0.000749102	0.00896294	-0.69402
TIGD5	1.05527	4.80999	3.94449	0.00077958	0.00926261	-0.732636
TMPRSS4	1.09328	2.75078	3.94082	0.000786333	0.00930895	-0.740987
COL13A1	1.24227	4.36201	3.94065	0.000786665	0.00930895	-0.741395
CLCN2	1.08126	3.13885	3.93884	0.000790015	0.00933239	-0.745508
GNPDA1	1.03948	6.06716	3.93781	0.000791928	0.00934959	-0.74785
SLC46A3	-1.44546	5.11064	-3.93298	0.00080099	0.00944063	-0.758863
CDCA7	1.52386	3.52119	3.93119	0.000804386	0.0094748	-0.762959
C1orf109	1.26214	4.20544	3.92515	0.000815894	0.00959379	-0.776708
RP1	-1.10773	1.89692	-3.91851	0.000828747	0.009717	-0.791835
MAN2B1	1.08498	5.17575	3.90869	0.000848132	0.00987637	-0.814207
ARMCX1	-1.29572	6.61816	-3.904	0.000857554	0.00997473	-0.824896
ZGPAT	1.4728	4.36841	3.90098	0.000863663	0.0100169	-0.831764
KLF6	-1.22307	5.10093	-3.90028	0.000865092	0.0100169	-0.833363
GPT2	1.08926	4.75606	3.89092	0.000884364	0.010209	-0.854675
SERPINF1	-1.61189	4.2528	-3.88885	0.000888685	0.0102437	-0.859389
MRGPRF	-1.0445	3.81604	-3.88545	0.000895817	0.0102969	-0.86712
BBS4	-1.08511	5.21999	-3.88323	0.000900513	0.0103334	-0.872177
ELF1	-1.05258	5.64046	-3.87693	0.000913972	0.0104352	-0.886523
MAP7D1	1.18599	4.47352	3.8761	0.000915759	0.0104444	-0.888412
MCAM	1.36613	3.18859	3.87608	0.000915796	0.0104444	-0.888451
FAM172A	-1.11878	4.45777	-3.87347	0.000921442	0.0104854	-0.894393
NCAPD2	1.60409	3.76219	3.87236	0.000923854	0.0105011	-0.896921
NHP2	1.05768	7.63937	3.86859	0.000932074	0.0105887	-0.905485
KCTD12	-2.42341	8.21406	-3.86627	0.00093719	0.0106232	-0.910777
ADCK5	1.39618	2.9728	3.8653	0.000939318	0.0106356	-0.912971
ZMYND12	-1.81474	3.78488	-3.86288	0.000944685	0.0106845	-0.918478
PIK3R3	1.16053	3.88178	3.85709	0.000957636	0.0107952	-0.931641
NAT1	-1.6823	4.52048	-3.85321	0.000966427	0.0108703	-0.940473
LGALS1	1.04404	4.56327	3.85279	0.000967366	0.0108749	-0.941411
E2F8	1.69043	3.60338	3.84175	0.000992822	0.0111244	-0.966513
LINC01091	-1.6938	2.31339	-3.83852	0.00100038	0.0111846	-0.973846
KIF13B	-1.39111	4.86736	-3.83668	0.00100474	0.0112211	-0.978043
MGC24103	-1.75628	5.64135	-3.83643	0.00100532	0.0112214	-0.978601
CCDC113	-3.29147	7.05554	-3.83491	0.00100893	0.0112556	-0.982065
PABPC1L	1.13711	4.79914	3.83443	0.00101006	0.0112604	-0.98315
SLC4A2	1.12948	4.04271	3.83382	0.00101151	0.0112604	-0.984534
FAM189A2	-1.08077	3.59464	-3.83357	0.00101211	0.0112604	-0.985107
C1orf213	1.0098	5.00393	3.83221	0.00101536	0.0112901	-0.988198
SGPL1	1.04287	4.89274	3.83132	0.00101748	0.0113016	-0.990216
ZNF133	1.25436	5.38645	3.82957	0.00102167	0.0113421	-0.994192
WBSCR17	1.43664	4.92612	3.82914	0.00102271	0.0113474	-0.995171
CCNB1IP1	1.01731	6.46381	3.82831	0.0010247	0.0113525	-0.997053
HBD	-1.14104	2.38202	-3.82826	0.00102484	0.0113525	-0.997176
MCM3	1.32271	5.25621	3.8209	0.00104272	0.0114947	-1.01389
MASTL	1.12707	2.49101	3.8187	0.00104812	0.011548	-1.01888
RPS16P5	-1.22998	4.87149	-3.81341	0.00106124	0.0116381	-1.0309
ZNF581	1.09592	4.1713	3.81334	0.00106142	0.0116381	-1.03105
HDHD1	-1.22048	5.42677	-3.80997	0.00106986	0.0116969	-1.0387
COX5B	1.01138	6.88482	3.80833	0.00107399	0.0117014	-1.04243
VANGL2	1.17195	3.9893	3.80378	0.00108554	0.0117888	-1.05275
AUP1	1.4091	6.22189	3.80213	0.00108975	0.011822	-1.05649
CTSH	-1.30868	7.30807	-3.79983	0.00109566	0.0118672	-1.06171
SLC9A2	1.50449	2.54893	3.79675	0.0011036	0.0119343	-1.06869
RALY	1.23339	5.76415	3.79291	0.00111363	0.0120334	-1.07742
DANCR	1.2152	5.10448	3.78773	0.00112724	0.0121323	-1.08915
CCDC137	1.05381	2.98787	3.773	0.00116694	0.0124961	-1.12255
ZBTB18	-1.18236	3.96989	-3.7729	0.00116723	0.0124961	-1.12279
FDPS	1.60901	6.75473	3.76333	0.00119374	0.012704	-1.14446
SLC7A11	-1.14044	3.83714	-3.76332	0.00119379	0.012704	-1.1445
MAFF	-1.49707	6.15141	-3.76301	0.00119465	0.012704	-1.14519
SLC23A1	-1.74696	3.38932	-3.75374	0.00122093	0.0129164	-1.16619
EGR2	-2.17298	5.86416	-3.75154	0.00122726	0.0129621	-1.17117
PSMA7	1.23219	5.93979	3.75154	0.00122727	0.0129621	-1.17118
CLIC6	-1.49142	3.54102	-3.75038	0.0012306	0.0129784	-1.1738
IQCG	-1.1117	3.23842	-3.74487	0.00124663	0.0131002	-1.18628
SIK1	-1.10989	4.85191	-3.73884	0.00126441	0.0132558	-1.19994
NUDT19	1.29732	5.21054	3.73813	0.00126653	0.013268	-1.20155
C1orf122	1.13788	6.28452	3.73792	0.00126714	0.013268	-1.20201
PRORSD1P	1.75054	4.787	3.73705	0.00126974	0.013268	-1.20399
SPEF1	-1.39364	4.00209	-3.73682	0.00127043	0.0132685	-1.20451
KIAA0226L	-1.57907	4.19157	-3.7366	0.00127109	0.0132686	-1.20501
DEPDC1B	1.16434	1.7236	3.73584	0.00127336	0.0132787	-1.20673
ITM2C	1.07509	4.73358	3.73242	0.00128362	0.0133721	-1.21447
SNRPA	1.32927	4.9516	3.73173	0.00128567	0.0133799	-1.21601
CLDN1	-1.53123	5.02962	-3.7264	0.00130187	0.0134935	-1.22808
TOMM5	1.28334	5.5755	3.72343	0.00131097	0.0135604	-1.2348
SPAG4	1.19318	3.26981	3.71796	0.0013279	0.0137078	-1.24716
COA6	1.2054	4.54255	3.71529	0.00133627	0.0137733	-1.25322
TMEM45A	1.51516	2.96844	3.71457	0.0013385	0.0137825	-1.25483
CREBL2	-1.12785	4.25209	-3.71421	0.00133963	0.0137871	-1.25564
AREG	-1.15388	2.34915	-3.71345	0.00134204	0.0138042	-1.25737
STYK1	-1.06624	3.69632	-3.71203	0.00134651	0.0138301	-1.26057
ZNF295-AS1	-2.08479	3.9577	-3.70952	0.00135445	0.0138984	-1.26624
DEPDC1	1.13032	1.98182	3.7061	0.00136536	0.0140026	-1.27397
PPP1R14C	-2.36428	4.95048	-3.70403	0.00137202	0.0140568	-1.27866
DHCR24	1.20127	6.26254	3.70006	0.00138486	0.014153	-1.28764
MCC	-1.0361	3.43513	-3.69963	0.00138624	0.0141549	-1.2886
PGR	-2.03381	3.58403	-3.69825	0.00139075	0.0141919	-1.29172
ARRDC4	-1.78725	4.76939	-3.69564	0.00139928	0.0142576	-1.29761
KLHL24	1.03042	4.77332	3.69445	0.00140319	0.0142904	-1.30031
CAPS	-2.25982	5.1255	-3.69192	0.00141153	0.014361	-1.30601
NDUFS6	1.20327	9.30727	3.69041	0.00141654	0.0144048	-1.30943
TSPAN7	1.41872	2.98086	3.68718	0.0014273	0.0144567	-1.31671
DNALI1	-1.76124	4.57852	-3.68508	0.00143436	0.0144995	-1.32147
AHCY	1.04811	7.01837	3.68446	0.00143646	0.0145064	-1.32287
CXXC5	1.19482	7.46808	3.6818	0.00144544	0.0145611	-1.32887
AIM1	-1.67559	5.49094	-3.67977	0.00145231	0.0146232	-1.33344
ALDOA	1.36092	6.31881	3.6728	0.00147623	0.014784	-1.34917
MUM1L1	-1.26102	3.8095	-3.66972	0.00148693	0.0148839	-1.35613
RNF139-AS1	1.03092	2.31243	3.66944	0.00148792	0.0148865	-1.35677
FAM3B	-1.82913	4.731	-3.66299	0.00151056	0.0150614	-1.3713
UBE2E2	1.05361	6.58518	3.65953	0.00152286	0.0151546	-1.37911
CHST6	-1.41216	3.30128	-3.65851	0.00152651	0.0151835	-1.38142
LPA	-1.69353	2.14328	-3.6572	0.00153119	0.0152152	-1.38436
KPNA5	-1.05162	3.83393	-3.65499	0.00153915	0.0152721	-1.38936
TTI1	1.18034	5.12428	3.65163	0.00155131	0.0153629	-1.39692
CYC1	1.71214	6.58269	3.65014	0.00155674	0.0153798	-1.40029
ZSCAN16	1.0439	4.08908	3.64997	0.00155735	0.0153798	-1.40066
KRT6A	1.57049	2.31009	3.64871	0.00156196	0.0154013	-1.40351
BGN	1.15897	3.75505	3.64829	0.00156348	0.0154089	-1.40445
ATP10B	-1.80775	4.61229	-3.64693	0.00156846	0.0154505	-1.40751
LRP11	-2.07436	6.17997	-3.64661	0.00156964	0.0154547	-1.40823
ANAPC4	-1.72454	7.65763	-3.64228	0.00158565	0.015545	-1.41799
TUBB	1.52757	6.59979	3.64168	0.00158786	0.0155487	-1.41933
ZNF367	1.40598	2.43431	3.63756	0.00160327	0.0156278	-1.42862
ARFGAP1	1.17749	5.27889	3.63555	0.00161081	0.015679	-1.43314
XIST	-1.88927	6.88568	-3.63004	0.00163174	0.0158224	-1.44556
SPAG1	-1.88543	3.43303	-3.62716	0.00164276	0.0158767	-1.45203
POLR2K	1.15621	4.74017	3.62531	0.0016499	0.0159306	-1.4562
C8orf12	-1.2252	2.42344	-3.62402	0.00165489	0.0159637	-1.45911
ESRRG	-1.52922	4.05126	-3.61792	0.00167869	0.0161243	-1.47284
HLA-DMB	-1.27271	5.18419	-3.61357	0.00169586	0.0162364	-1.48262
DNAJC3	-1.04267	4.28845	-3.61228	0.001701	0.0162705	-1.48554
RGS2	-2.00062	5.63998	-3.60742	0.00172042	0.0163929	-1.49645
FAT1	-1.80123	6.85339	-3.60708	0.00172182	0.0163929	-1.49723
TFF3	-1.41027	4.03176	-3.60269	0.00173958	0.0165236	-1.5071
LHX1	1.91357	2.90941	3.60223	0.00174146	0.0165275	-1.50813
C11orf74	-1.50971	4.07995	-3.59726	0.0017618	0.0166882	-1.5193
LOC729680	1.23104	2.94249	3.59487	0.0017717	0.0167587	-1.52468
POP5	1.12604	4.33933	3.59124	0.00178679	0.0168547	-1.53283
KIF1A	1.0721	2.65545	3.58989	0.00179243	0.0168782	-1.53586
NCAPD3	1.00154	4.00128	3.58967	0.00179333	0.0168782	-1.53634
EFCAB4A	1.17128	2.96318	3.58946	0.00179424	0.0168782	-1.53683
KLF10	-1.75844	6.3541	-3.58881	0.00179696	0.0168805	-1.53828
TSPAN8	-2.09297	4.34099	-3.58838	0.00179876	0.0168897	-1.53925
MDK	1.22919	4.35281	3.58789	0.00180083	0.0169013	-1.54035
RIBC2	-1.81314	4.3801	-3.58608	0.00180845	0.0169521	-1.54441
DNAJB6	1.03259	3.67757	3.58602	0.00180872	0.0169521	-1.54456
GATA6-AS1	-1.25434	5.94702	-3.57951	0.00183645	0.0170945	-1.55917
GPRASP1	-1.28002	3.93664	-3.57796	0.00184311	0.017141	-1.56265
APOA1	1.71753	4.27625	3.57735	0.00184573	0.0171575	-1.56401
CLDN3	1.16395	4.48444	3.57379	0.00186117	0.0172497	-1.57202
LOC283070	1.28444	3.83873	3.57282	0.0018654	0.0172776	-1.5742
GAPDH	1.32254	7.99109	3.57071	0.0018746	0.0173392	-1.57892
FBXO8	-1.57374	3.87661	-3.56855	0.0018841	0.0174034	-1.58377
ASS1	1.2687	7.86688	3.55861	0.00192836	0.0176747	-1.60608
STON2	1.23195	3.45573	3.55414	0.00194859	0.0178156	-1.61609
FTL	1.00357	8.0556	3.55399	0.00194926	0.0178156	-1.61642
TMEM17	-1.53967	3.74176	-3.54891	0.00197253	0.0179809	-1.62781
NIF3L1	1.29999	5.72293	3.54886	0.00197273	0.0179809	-1.62791
CIB1	-1.20273	5.81348	-3.54827	0.00197546	0.0179955	-1.62924
ZCCHC24	-1.0931	5.54368	-3.54783	0.00197749	0.018006	-1.63023
RARRES3	-1.42912	4.08698	-3.54385	0.00199596	0.0181162	-1.63915
SLIT2	-1.41042	5.40563	-3.54382	0.00199608	0.0181162	-1.63921
MEN1	1.03771	3.98531	3.54111	0.00200874	0.0182149	-1.64528
PPP1CA	1.02736	5.1229	3.54026	0.00201277	0.0182379	-1.6472
TTLL7	-1.25126	3.19122	-3.53984	0.00201474	0.0182478	-1.64814
LOC286189	-1.7074	2.84556	-3.53693	0.00202844	0.0183325	-1.65464
MORN2	-1.30578	4.03305	-3.5369	0.00202858	0.0183325	-1.65471
MAOA	-1.01248	2.89581	-3.52999	0.00206157	0.018565	-1.67019
PRSS23	1.16773	3.79783	3.52943	0.00206425	0.0185728	-1.67143
CH25H	-1.09942	2.41023	-3.52576	0.00208201	0.018674	-1.67965
DYNC2H1	-1.15214	3.95322	-3.52474	0.00208699	0.018687	-1.68194
CXCL8	-2.19706	3.69504	-3.5199	0.00211067	0.0188743	-1.69277
SH3BP5	-1.04328	7.15567	-3.51692	0.0021254	0.0189728	-1.69944
BCHE	-1.14366	2.06997	-3.51656	0.0021272	0.0189738	-1.70025
MICU3	-1.86508	4.21826	-3.51569	0.00213151	0.0189942	-1.70219
ANXA1	-2.01315	6.54074	-3.50829	0.00216859	0.019229	-1.71873
SNHG17	1.20633	5.51736	3.50766	0.00217178	0.0192376	-1.72014
S100A10	-1.25458	5.59617	-3.50762	0.00217199	0.0192376	-1.72023
LINC00115	1.16976	1.97548	3.50079	0.00220681	0.0194954	-1.73548
PRKAR1A	-1.36461	5.18296	-3.49875	0.00221735	0.0195716	-1.74005
UHRF1	1.43274	4.49502	3.49454	0.00223922	0.0197136	-1.74946
IQCD	-1.74084	4.34602	-3.49357	0.00224427	0.0197496	-1.75162
MRAP2	-2.15137	4.12095	-3.49161	0.00225453	0.0197962	-1.75599
ISG15	2.55146	6.22021	3.49159	0.00225464	0.0197962	-1.75604
CLCN3	-1.05572	4.28364	-3.49145	0.00225537	0.0197962	-1.75635
TNFAIP8	-1.0569	2.94443	-3.48922	0.0022671	0.0198736	-1.76132
NR4A1	-1.18366	4.53719	-3.48699	0.00227896	0.0199434	-1.76632
MCM10	1.1182	2.2682	3.48567	0.00228598	0.0199664	-1.76927
PIGA	-1.34846	4.02028	-3.48508	0.00228908	0.0199807	-1.77057
GPR171	-1.56012	2.57602	-3.48365	0.00229672	0.0200388	-1.77376
FASTKD1	1.37744	6.65959	3.47957	0.00231866	0.0201786	-1.78287
RGCC	-1.02352	3.29621	-3.47872	0.00232324	0.0202012	-1.78476
ZMYND19	1.19199	3.78103	3.47833	0.00232535	0.0202024	-1.78563
FAM174A	-2.53513	6.48316	-3.47385	0.00234976	0.0203525	-1.79563
ZFPM2	-1.59235	3.69333	-3.47011	0.00237029	0.02049	-1.80397
CADPS2	-1.52878	4.37444	-3.46852	0.00237911	0.020556	-1.80752
HAUS7	1.01171	3.24816	3.46466	0.00240057	0.0206673	-1.81613
LAMA1	1.40294	2.54992	3.46432	0.00240244	0.0206703	-1.81687
SERPINI2	-1.71908	3.34634	-3.45895	0.00243268	0.0208944	-1.82885
HOTAIRM1	-1.27038	3.85618	-3.45878	0.0024336	0.0208944	-1.82921
MOK	-1.05147	5.24603	-3.45827	0.00243649	0.0209018	-1.83035
MGME1	1.09374	5.82624	3.45695	0.00244399	0.0209485	-1.83329
PSMD2	1.04513	8.38667	3.4538	0.00246198	0.0210762	-1.84031
KIF4A	1.10551	3.32042	3.45252	0.00246933	0.0211215	-1.84317
SNHG19	1.30391	5.24676	3.45077	0.00247941	0.0211811	-1.84707
POLD1	1.2188	4.24536	3.45038	0.00248166	0.0211915	-1.84794
REV3L	-1.12606	6.01731	-3.44579	0.00250826	0.0213562	-1.85814
SDCBP	-1.32688	8.53209	-3.44496	0.00251311	0.0213797	-1.85999
C16orf54	-1.05156	1.80614	-3.43888	0.00254892	0.0216317	-1.87354
ZBTB20	-1.142	5.49827	-3.43444	0.00257536	0.0218005	-1.88341
SPATA7	-1.11357	3.78587	-3.4288	0.00260934	0.0220062	-1.89595
ZNF667-AS1	1.02047	5.4625	3.4274	0.00261783	0.0220505	-1.89906
MKKS	1.3378	5.88868	3.42582	0.00262742	0.0221041	-1.90256
C15orf61	1.29647	5.04281	3.42225	0.00264933	0.0222643	-1.9105
EPS8	-1.7438	4.89101	-3.42169	0.00265276	0.0222777	-1.91174
MT1F	1.34252	5.60137	3.41813	0.0026748	0.0224075	-1.91965
ZBED5-AS1	-1.3556	4.04452	-3.41766	0.00267773	0.0224075	-1.9207
ATP6V0E2	1.21713	4.90487	3.41448	0.00269755	0.0225214	-1.92775
MAP4K1	1.27395	3.5048	3.41397	0.00270076	0.0225357	-1.92889
UCA1	1.84883	3.07611	3.40722	0.00274345	0.0227897	-1.94389
WNT11	1.94781	3.63137	3.40481	0.00275882	0.022887	-1.94923
SPINK5	1.73909	4.08635	3.40297	0.00277066	0.0229598	-1.95333
CCDC170	-1.24042	2.86271	-3.40116	0.00278227	0.0230374	-1.95732
PGM1	1.62768	5.84036	3.39255	0.00283847	0.023368	-1.97644
KHDRBS3	1.12577	3.22267	3.39231	0.00284	0.023368	-1.97695
IDH1	1.03349	4.70181	3.38862	0.00286442	0.0235201	-1.98514
TMEM139	1.22655	4.31077	3.38708	0.0028747	0.0235592	-1.98856
MARCKS	-1.17329	4.20237	-3.387	0.00287524	0.0235592	-1.98874
TM7SF2	1.27009	3.99253	3.38625	0.00288024	0.0235814	-1.9904
PHYH	1.10549	5.88574	3.38405	0.00289496	0.0236829	-1.99527
SCG5	1.986	3.17955	3.38325	0.00290034	0.0237174	-1.99705
SNRK-AS1	1.19772	4.08	3.37776	0.00293751	0.0238782	-2.00921
FBXL5	-1.13335	5.31527	-3.3672	0.00301026	0.0242959	-2.03258
ENO2	1.48639	3.98479	3.36584	0.00301975	0.0243375	-2.03558
PLOD1	1.12026	4.65624	3.36579	0.00302013	0.0243375	-2.03571
LEMD1	1.61206	3.65413	3.36119	0.00305245	0.024501	-2.04587
ZDHHC2	-1.20084	3.08967	-3.36063	0.00305646	0.024514	-2.04712
COMMD2	1.00571	4.71686	3.35833	0.00307273	0.0246113	-2.05219
HARS2	1.03147	5.33591	3.34454	0.00317247	0.0251195	-2.08268
BCAP31	1.19943	6.39537	3.34423	0.00317473	0.0251277	-2.08337
COL5A2	1.19447	4.13106	3.34211	0.00319031	0.025212	-2.08804
VKORC1	1.00454	4.39652	3.34051	0.00320216	0.0252763	-2.09157
PCMTD2	1.01	4.86745	3.33315	0.00325714	0.0256509	-2.10782
OSR2	-2.19546	5.21579	-3.3318	0.00326734	0.0257213	-2.1108
ZMYM1	1.41353	4.80978	3.3264	0.00330842	0.0259548	-2.12272
BNIP3	1.51359	4.59715	3.32565	0.00331414	0.0259798	-2.12437
ASL	1.08204	3.34402	3.32506	0.00331867	0.0259954	-2.12567
MPPED2	-1.63274	4.19958	-3.32198	0.00334239	0.0260913	-2.13246
EMC3-AS1	1.08935	3.12552	3.32106	0.00334954	0.0261271	-2.1345
BLACAT1	1.18713	4.18534	3.32047	0.00335408	0.0261426	-2.13579
E2F3	1.01305	6.77073	3.31489	0.00339759	0.0263913	-2.14808
C4orf3	-1.05898	5.23568	-3.31362	0.00340757	0.0264487	-2.15088
SPC25	1.0042	1.76321	3.30878	0.00344594	0.0266858	-2.16155
TXN	-1.19784	5.38525	-3.30517	0.00347481	0.0268687	-2.1695
DPY19L2P2	-1.30441	3.13229	-3.30274	0.00349432	0.026989	-2.17484
IRS1	-1.21466	4.82139	-3.29818	0.00353132	0.0272131	-2.18488
UGCG	-1.01756	6.52835	-3.29613	0.0035481	0.0273116	-2.1894
ANO9	1.06075	4.32711	3.29443	0.00356204	0.0273777	-2.19313
CDH18	1.28763	2.74888	3.29361	0.00356879	0.027409	-2.19494
FOXO6	1.51743	5.30584	3.28692	0.00362429	0.0277104	-2.20964
RFXANK	1.0889	4.72475	3.28031	0.00367998	0.0280314	-2.22416
COX6C	1.57586	7.47912	3.27668	0.00371092	0.0281936	-2.23214
GALNT7	-1.51975	5.02463	-3.27636	0.0037137	0.0282019	-2.23285
CSNK2B	1.2961	5.90693	3.27485	0.00372659	0.0282602	-2.23615
MYOM2	-1.03391	3.21188	-3.27442	0.0037303	0.0282728	-2.2371
TNNI3	1.38089	3.30069	3.27419	0.00373226	0.0282728	-2.2376
PPAPDC2	1.14568	3.16874	3.27418	0.0037324	0.0282728	-2.23763
FGF18	1.03503	3.75081	3.27313	0.00374141	0.0283306	-2.23993
CD2	-1.00044	2.48181	-3.27113	0.00375869	0.0284193	-2.24431
PTPRT	-1.07028	3.39328	-3.26899	0.00377729	0.0285073	-2.24901
PANK1	1.40703	4.75948	3.26874	0.00377945	0.0285131	-2.24956
SF3A3	1.24433	4.44948	3.26562	0.00380675	0.0286367	-2.25641
BBS12	-1.29578	2.83078	-3.26559	0.00380703	0.0286367	-2.25648
PPT1	1.25114	6.05612	3.26246	0.00383461	0.0287842	-2.26335
CCDC146	-1.68602	5.9305	-3.24883	0.00395693	0.0295147	-2.29323
COQ10A	-1.11266	5.57817	-3.24337	0.00400697	0.0298227	-2.30518
WRB	-1.92514	6.1156	-3.24174	0.00402203	0.0299021	-2.30875
JPX	-1.18477	3.33603	-3.24139	0.00402524	0.0299152	-2.30951
ANKRD36BP2	-1.10692	3.11469	-3.23986	0.00403944	0.0300098	-2.31286
CACNA2D2	1.59653	4.12019	3.23831	0.0040539	0.0300989	-2.31626
NFIL3	-1.10447	4.87524	-3.23291	0.00410451	0.0303426	-2.32806
GADD45B	-1.16833	5.03661	-3.23256	0.0041079	0.0303426	-2.32884
OLFML2A	1.21034	3.82728	3.23083	0.0041242	0.0304167	-2.33261
ZNF850	1.07681	3.05584	3.2307	0.00412544	0.0304167	-2.33289
ATP5B	1.2052	7.362	3.22816	0.00414961	0.030507	-2.33845
RCAN3	-1.19293	3.79066	-3.22686	0.00416208	0.0305657	-2.3413
FAM60A	1.04835	5.76693	3.22633	0.00416709	0.0305916	-2.34244
LOC101929622	-1.02754	1.84613	-3.22415	0.00418811	0.0307128	-2.34723
AASS	-1.0481	2.84802	-3.22242	0.0042048	0.0307911	-2.35101
CCDC6	1.02333	6.94667	3.22034	0.00422491	0.030927	-2.35554
LOC728392	-1.82299	5.38715	-3.21761	0.00425152	0.0310598	-2.36151
DMXL1	-1.03955	5.13345	-3.21097	0.00431684	0.031398	-2.376
FZD10	1.85251	4.60306	3.20324	0.00439419	0.0318023	-2.39287
IL4R	-1.10952	4.45078	-3.20203	0.00440638	0.0318567	-2.3955
SPINT2	1.36169	7.67937	3.19366	0.00449189	0.0323378	-2.41375
PPAP2C	-1.25366	3.24939	-3.18746	0.00455627	0.0326825	-2.42726
MAP1B	-1.01079	3.79095	-3.18725	0.00455842	0.0326825	-2.42771
CLHC1	-1.30306	3.96423	-3.18211	0.00461252	0.0329097	-2.43891
ANXA4	-1.45096	7.05545	-3.18039	0.00463069	0.0329773	-2.44264
SYNDIG1	1.07493	4.29346	3.17653	0.00467186	0.0332127	-2.45104
LOC286052	1.35912	4.2405	3.1729	0.00471093	0.033444	-2.45894
INA	1.16367	2.3636	3.16839	0.00475981	0.0336858	-2.46874
PAQR6	1.18568	3.53268	3.16223	0.00482749	0.0340001	-2.48213
HEATR5A	-1.57132	3.88267	-3.16184	0.00483181	0.0340188	-2.48298
HLX	-1.23179	4.34999	-3.1598	0.00485444	0.0341078	-2.48741
BBOX1	-1.49927	3.41204	-3.15843	0.0048697	0.0341915	-2.49039
AP2M1	1.41378	5.7568	3.15445	0.00491422	0.034445	-2.49901
B2M	-1.12493	7.34628	-3.15159	0.00494656	0.0345651	-2.50523
PAX2	-1.21733	3.49898	-3.14628	0.00500695	0.0348561	-2.51674
ATP7A	-1.02424	3.93439	-3.14333	0.00504084	0.0350206	-2.52313
HOOK2	1.19737	4.22366	3.14276	0.00504745	0.0350546	-2.52437
LY6E	1.43237	4.68189	3.14113	0.00506627	0.0351734	-2.5279
KIAA0232	-1.15776	6.05953	-3.12911	0.00520753	0.0359383	-2.55395
DNAJC12	-1.041	2.43908	-3.1289	0.00520996	0.0359393	-2.5544
RAPGEF4	-1.04929	2.14589	-3.12485	0.00525842	0.0361977	-2.56317
CASC1	-1.58507	4.57629	-3.12473	0.00525981	0.0361977	-2.56342
PRRT3-AS1	1.14851	2.98293	3.11437	0.00538573	0.036792	-2.58582
PPP1R14A	1.44278	2.47083	3.10904	0.00545165	0.0371927	-2.59733
MNS1	-1.85704	4.65312	-3.10508	0.0055012	0.0374932	-2.6059
AOC1	1.79382	2.55982	3.10398	0.00551501	0.0375639	-2.60827
METTL7B	1.1174	2.33719	3.10392	0.00551568	0.0375639	-2.60838
CRYBG3	-1.01731	6.08252	-3.10095	0.0055532	0.0377595	-2.6148
TSPAN1	-1.47149	4.33449	-3.10073	0.00555606	0.0377656	-2.61529
NDN	-1.57533	5.65452	-3.09994	0.00556598	0.0377836	-2.61697
NR2F1	-1.85051	5.70804	-3.09889	0.00557936	0.0378125	-2.61925
TMEM69	1.18483	7.00131	3.09431	0.00563793	0.038128	-2.62913
DNAAF2	-1.08894	2.96696	-3.09422	0.00563907	0.038128	-2.62932
MT1HL1	1.15334	5.10386	3.09264	0.0056594	0.038215	-2.63272
VWCE	1.5301	5.38845	3.09127	0.00567717	0.038297	-2.63569
NDRG1	1.61978	7.52019	3.08396	0.0057725	0.0387739	-2.65143
HSPH1	-1.19098	5.34209	-3.08047	0.00581857	0.0389427	-2.65895
TATDN1	1.27866	4.65254	3.0772	0.00586196	0.0391819	-2.66597
COL18A1	1.45257	5.99379	3.07641	0.00587261	0.0392065	-2.66769
RNF138	-1.25486	5.70892	-3.0713	0.00594125	0.0396342	-2.67867
CRYZ	-1.69741	5.80552	-3.06628	0.00600946	0.039999	-2.68946
ARF5	1.04841	5.11316	3.06492	0.00602813	0.0400961	-2.69239
BORA	1.37531	2.85027	3.06314	0.00605255	0.0402193	-2.69621
GRAMD2	-1.41047	6.36069	-3.06131	0.00607786	0.0403351	-2.70015
IL18RAP	-1.30923	3.21409	-3.05939	0.0061044	0.0404718	-2.70427
CDC123	1.09246	5.70616	3.05923	0.00610668	0.0404738	-2.70462
LAPTM4B	1.35348	5.82827	3.05869	0.00611417	0.0404972	-2.70578
CTCFL	1.45007	1.91127	3.05606	0.00615078	0.0406345	-2.71142
CYR61	-1.6923	6.62612	-3.05368	0.00618421	0.0407886	-2.71654
TBCB	1.12189	6.19941	3.05345	0.00618736	0.0407886	-2.71702
WTIP	1.07578	3.77375	3.04925	0.00624678	0.0410706	-2.72604
IGFBP3	1.4775	5.28545	3.037	0.006423	0.0419587	-2.75231
LY75	-1.84963	4.63364	-3.03584	0.0064399	0.0420021	-2.75479
LINC00893	-1.66298	3.72495	-3.03518	0.00644958	0.0420518	-2.7562
ZNF439	1.12357	3.27078	3.03327	0.00647756	0.0421479	-2.76029
RBKS	-1.20921	4.99525	-3.02534	0.0065952	0.0427565	-2.77727
PI3	1.10924	2.28203	3.02304	0.00662967	0.042925	-2.78219
ZYG11A	1.04849	2.56759	3.01465	0.00675683	0.0435279	-2.8001
BLNK	-1.17891	4.26435	-3.01284	0.00678467	0.0436249	-2.80398
FXYD6	1.21212	4.22789	3.0105	0.00682069	0.0438014	-2.80897
PTOV1	1.12215	5.02619	3.00761	0.00686544	0.0439509	-2.81514
GOLT1B	1.05684	4.99262	3.00678	0.00687846	0.0439791	-2.81692
WASF1	1.09248	4.3639	3.00314	0.00693539	0.0442188	-2.82469
CD14	-1.31155	4.41351	-2.99946	0.00699342	0.0444364	-2.83254
ATP5G3	1.19694	5.78495	2.99908	0.00699929	0.04446	-2.83333
ADCY8	-1.20663	2.66217	-2.99033	0.00713922	0.0451246	-2.85198
SLFN13	-1.01291	2.83818	-2.98377	0.0072459	0.0456438	-2.86595
ENKD1	-1.1898	5.04943	-2.9779	0.00734267	0.0460267	-2.87844
RSPO3	1.33112	2.53176	2.9662	0.00753924	0.0468261	-2.9033
VIM	-1.06346	4.84476	-2.96126	0.00762378	0.0471843	-2.91379
ZDHHC11	-1.00744	6.12948	-2.9572	0.00769393	0.0475008	-2.92241
ZIC1	1.03846	2.47249	2.95565	0.00772081	0.047638	-2.92569
SECISBP2L	-1.05228	5.97279	-2.95516	0.00772943	0.0476721	-2.92674
APEX1	1.01895	7.53432	2.95252	0.00777552	0.0478458	-2.93233
LRRC6	-1.4126	4.9647	-2.9513	0.0077969	0.0479485	-2.93491
DPY19L2	-1.66379	4.23546	-2.94709	0.00787115	0.048254	-2.94382
C8orf33	1.25854	2.98686	2.94146	0.00797177	0.0487746	-2.95576
SARAF	-1.69394	9.37919	-2.94091	0.00798153	0.0488051	-2.95691
CD59	-1.05118	5.48813	-2.93831	0.00802836	0.0490544	-2.96241
TAC1	-1.74137	2.04804	-2.931	0.00816166	0.0495659	-2.97788
ZNF404	-1.31297	3.53387	-2.92968	0.00818596	0.0496692	-2.98067
GJA1	-1.83195	6.34854	-2.92893	0.00819968	0.0496978	-2.98224
APOBEC3B	1.07486	2.53999	2.92768	0.00822286	0.0497751	-2.9849
ATP7B	1.02983	4.38152	2.92688	0.00823759	0.04982	-2.98658
ZNF106	-1.04489	3.83836	-2.92582	0.00825728	0.0498802	-2.98882
KIAA0895	-1.09498	3.19956	-2.92406	0.00829009	0.0499573	-2.99254
