# Supplementary material for: Identification of core genes for early diagnosis and the EMT modulation of ovarian serous cancer by bioinformatics perspective
Source: Aging (Albany NY). 2021 Jan 25;13(2):3112–45. doi: 10.18632/aging.202524 (PMC7880353; doi:10.18632/aging.202524)
Supplement: Supplementary Table 3 [file aging-13-202524-s004.xlsx]

## Sheet: GO-BP
Supplementary Table 3. GO Terms and KEGG functional enrichment analyses of co-DEGs.
Category	Term	Count	%	PValue	Genes	List Total	Pop Hits	Pop Total	Fold Enrichment	Bonferroni	Benjamini	FDR
GOTERM_BP_DIRECT	GO:0051301~cell division	37	13.0742	2.54856e-20	CKS1B, BORA, KNTC1, PTTG1, FAM83D, KIF2C, CDCA8, NCAPH, SAC3D1, NCAPG, CABLES2, MASTL, CDCA5, CDCA3, CDC7, KIF14, CDK1, KIF11, PSRC1, TPX2, NUF2, CENPF, KIF18B, NDC80, BIRC5, CDC20, TACC3, UBE2C, SMC4, NCAPD2, CCNB1, FAM64A, TIMELESS, RCC2, SPAG5, ZWINT, BUB1B	249	350	16792	7.12913	3.20354e-17	3.20354e-17	4.14397e-17
GOTERM_BP_DIRECT	GO:0007067~mitotic nuclear division	27	9.54064	4.32063e-15	BORA, KNTC1, ANLN, PTTG1, CEP55, FAM83D, KIF2C, SAC3D1, MASTL, CDCA5, ASPM, CDCA3, CDK1, KIF11, KIF15, TPX2, NUF2, CENPF, CDC20, BIRC5, NDC80, PBK, FAM64A, RCC2, TIMELESS, KLHL13, BUB1B	249	248	16792	7.34201	5.44265e-12	2.72138e-12	7.03881e-12
GOTERM_BP_DIRECT	GO:0006260~DNA replication	21	7.42049	1.40976e-13	RECQL4, CDC7, CDK1, DTL, KIAA0101, RMI2, TOPBP1, MCM2, MCM10, RNASEH2A, MCM3, DNA2, RFC4, MCM7, TIMELESS, POLE2, RRM2, PCNA, CHTF18, ORC6, FEN1	249	155	16792	9.13673	1.77235e-10	5.90783e-11	2.29261e-10
GOTERM_BP_DIRECT	GO:0007062~sister chromatid cohesion	13	4.59364	3.8472e-08	KIF2C, CDCA8, RCC2, ZWINT, KNTC1, NUF2, CENPF, BUB1B, NDC80, BIRC5, CDC20, CENPU, CDCA5	249	103	16792	8.51156	4.83582e-05	1.20898e-05	6.25556e-05
GOTERM_BP_DIRECT	GO:0000082~G1/S transition of mitotic cell cycle	12	4.24028	3.18681e-07	CDC7, CDK1, MCM7, POLE2, RRM2, PCNA, ORC6, MCM2, MCM3, MCM10, CDKN3, CDCA5	249	102	16792	7.93385	0.000400502	8.01132e-05	0.000518175
GOTERM_BP_DIRECT	GO:0006270~DNA replication initiation	8	2.82686	3.45914e-07	CDC7, MCM7, POLE2, ORC6, TOPBP1, MCM2, MCM3, MCM10	249	32	16792	16.8594	0.000434719	7.24664e-05	0.000562456
GOTERM_BP_DIRECT	GO:0008283~cell proliferation	21	7.42049	5.45886e-07	STIL, CKS1B, CDK1, MKI67, DLGAP5, E2F8, KIF15, TPX2, CENPF, TACC3, MCM10, SCRIB, FAM83D, KIF2C, UHRF1, MCM7, EPS8, PCNA, BUB1B, FRAT2, MELK	249	366	16792	3.86938	0.000685944	9.80208e-05	0.000887609
GOTERM_BP_DIRECT	GO:0000070~mitotic sister chromatid segregation	7	2.4735	1.3672e-06	SPAG5, ZWINT, NUSAP1, KIF18B, NDC80, ESPL1, SMC4	249	25	16792	18.8826	0.0017171	0.000214799	0.00222305
GOTERM_BP_DIRECT	GO:0007076~mitotic chromosome condensation	6	2.12014	1.796e-06	NCAPH, NCAPG, NUSAP1, CDCA5, SMC4, NCAPD2	249	15	16792	26.9751	0.00225503	0.00025081	0.00292026
GOTERM_BP_DIRECT	GO:0007018~microtubule-based movement	10	3.53357	2.98958e-06	KIF23, KIF14, KIF2C, KIF4A, KIF11, KIF15, KIF18B, RACGAP1, DYNLRB2, KIF20A	249	81	16792	8.32565	0.00375085	0.00037572	0.00486095
GOTERM_BP_DIRECT	GO:0000281~mitotic cytokinesis	7	2.4735	3.48997e-06	KIF23, KIF4A, NUSAP1, ANLN, CEP55, RACGAP1, KIF20A	249	29	16792	16.2781	0.00437729	0.00039873	0.00567455
GOTERM_BP_DIRECT	GO:0007052~mitotic spindle organization	7	2.4735	4.30883e-06	CCNB1, STIL, SYNE4, KIF11, GPSM2, TTK, NDC80	249	30	16792	15.7355	0.00540156	0.000451249	0.00700593
GOTERM_BP_DIRECT	GO:0007080~mitotic metaphase plate congression	7	2.4735	1.54719e-05	KIF14, CCNB1, KIF2C, CDCA8, PSRC1, CEP55, CDCA5	249	37	16792	12.7585	0.0192604	0.0014949	0.0251543
GOTERM_BP_DIRECT	GO:0060236~regulation of mitotic spindle organization	4	1.41343	0.000168725	PSRC1, BORA, TPX2, TACC3	249	8	16792	33.7189	0.19112	0.0150361	0.273994
GOTERM_BP_DIRECT	GO:0000086~G2/M transition of mitotic cell cycle	10	3.53357	0.000200686	CCNB1, CDK1, FOXM1, BORA, TPX2, BIRC5, TUBG1, MASTL, MELK, HMMR	249	137	16792	4.92246	0.222979	0.0166785	0.325817
GOTERM_BP_DIRECT	GO:0007059~chromosome segregation	7	2.4735	0.000497425	KIF11, HJURP, SPAG5, NUF2, CENPF, NDC80, TOP2A	249	68	16792	6.94212	0.464963	0.0383346	0.805753
GOTERM_BP_DIRECT	GO:0051310~metaphase plate congression	4	1.41343	0.000634428	FAM83D, KIF2C, CENPF, NDC80	249	12	16792	22.4793	0.549649	0.0458413	1.0266
GOTERM_BP_DIRECT	GO:0000910~cytokinesis	6	2.12014	0.00068836	KIF23, PRC1, KLHL13, BIRC5, ESPL1, KIF20A	249	48	16792	8.42972	0.579187	0.0469492	1.11342
GOTERM_BP_DIRECT	GO:0031145~anaphase-promoting complex-dependent catabolic process	7	2.4735	0.00110411	CCNB1, CDK1, PSMD2, BUB1B, CDC20, PTTG1, UBE2C	249	79	16792	5.9755	0.750585	0.0704792	1.78024
GOTERM_BP_DIRECT	GO:0000722~telomere maintenance via recombination	5	1.76678	0.00120634	DNA2, RFC4, POLE2, PCNA, FEN1	249	32	16792	10.5371	0.780693	0.0730578	1.94356
GOTERM_BP_DIRECT	GO:0043137~DNA replication, removal of RNA primer	3	1.06007	0.0012782	DNA2, RNASEH2A, FEN1	249	4	16792	50.5783	0.799658	0.0737013	2.05822
GOTERM_BP_DIRECT	GO:0007049~cell cycle	11	3.88693	0.00149197	CKS1B, E2F3, UHRF1, HJURP, FOXM1, CABLES2, CHTF18, CTCFL, CDC20, MCM2, CDKN3	249	217	16792	3.4185	0.846922	0.0817718	2.39853
GOTERM_BP_DIRECT	GO:0007051~spindle organization	4	1.41343	0.00154586	KIF11, SPAG5, TTK, ASPM	249	16	16792	16.8594	0.856963	0.0810745	2.48415
GOTERM_BP_DIRECT	GO:0019985~translesion synthesis	5	1.76678	0.00188696	RFC4, ISG15, DTL, PCNA, KIAA0101	249	36	16792	9.36635	0.906906	0.0941873	3.02442
GOTERM_BP_DIRECT	GO:0051726~regulation of cell cycle	8	2.82686	0.00245174	CCNB1, DTL, FOXM1, KIAA0101, CENPF, CABLES2, MASTL, MYBL2	249	124	16792	4.35082	0.954298	0.116112	3.91282
GOTERM_BP_DIRECT	GO:0051276~chromosome organization	4	1.41343	0.00258887	CDCA8, PTTG1, RAD54L, SMC4	249	19	16792	14.1974	0.961551	0.117789	4.12738
GOTERM_BP_DIRECT	GO:0006281~DNA repair	11	3.88693	0.00267601	RECQL4, CDK1, UHRF1, RAD51AP1, POLE2, FANCI, FOXM1, TOPBP1, PTTG1, RAD54L, FEN1	249	235	16792	3.15666	0.96555	0.117282	4.26347
GOTERM_BP_DIRECT	GO:0031536~positive regulation of exit from mitosis	3	1.06007	0.00313357	BIRC5, UBE2C, CDCA5	249	6	16792	33.7189	0.98065	0.13142	4.97517
GOTERM_BP_DIRECT	GO:0006974~cellular response to DNA damage stimulus	10	3.53357	0.00386702	DDX39A, SGK1, MCM7, TIMELESS, DTL, KIAA0101, TOPBP1, MASTL, MCM10, TOP2A	249	208	16792	3.2422	0.992329	0.154596	6.10563
GOTERM_BP_DIRECT	GO:0051436~negative regulation of ubiquitin-protein ligase activity involved in mitotic cell cycle	6	2.12014	0.0039788	CCNB1, CDK1, PSMD2, BUB1B, CDC20, UBE2C	249	71	16792	5.69896	0.993338	0.153838	6.2768
GOTERM_BP_DIRECT	GO:0060045~positive regulation of cardiac muscle cell proliferation	4	1.41343	0.00398238	CCNB1, MEF2C, CDK1, ZFPM2	249	22	16792	12.2614	0.993368	0.14939	6.28228
GOTERM_BP_DIRECT	GO:0051439~regulation of ubiquitin-protein ligase activity involved in mitotic cell cycle	4	1.41343	0.00453028	CCNB1, CDK1, CDC20, UBE2C	249	23	16792	11.7283	0.996679	0.163358	7.11704
GOTERM_BP_DIRECT	GO:0051437~positive regulation of ubiquitin-protein ligase activity involved in regulation of mitotic cell cycle transition	6	2.12014	0.00532068	CCNB1, CDK1, PSMD2, BUB1B, CDC20, UBE2C	249	76	16792	5.32403	0.998776	0.183894	8.30895
GOTERM_BP_DIRECT	GO:0051256~mitotic spindle midzone assembly	3	1.06007	0.00573623	KIF23, KIF4A, RACGAP1	249	8	16792	25.2892	0.999276	0.191587	8.92983
GOTERM_BP_DIRECT	GO:0006259~DNA metabolic process	4	1.41343	0.00643809	MKI67, NME1, TOPBP1, TK1	249	26	16792	10.375	0.999702	0.207028	9.96953
GOTERM_BP_DIRECT	GO:0006890~retrograde vesicle-mediated transport, Golgi to ER	6	2.12014	0.00731935	KIF23, KIF2C, KIF4A, KIF11, KIF15, RACGAP1	249	82	16792	4.93447	0.999902	0.22625	11.2592
GOTERM_BP_DIRECT	GO:0007019~microtubule depolymerization	3	1.06007	0.00904112	KIF14, KIF2C, KIF18B	249	10	16792	20.2313	0.999989	0.265489	13.7291
GOTERM_BP_DIRECT	GO:0006268~DNA unwinding involved in DNA replication	3	1.06007	0.00904112	MCM7, MCM2, TOP2A	249	10	16792	20.2313	0.999989	0.265489	13.7291
GOTERM_BP_DIRECT	GO:0034501~protein localization to kinetochore	3	1.06007	0.00904112	CDK1, TTK, BUB1B	249	10	16792	20.2313	0.999989	0.265489	13.7291
GOTERM_BP_DIRECT	GO:0006915~apoptotic process	17	6.00707	0.0102854	MEF2C, CDK1, SGK1, PRAME, TPX2, BIRC5, MAL, ESPL1, MCM2, EPB41L3, PEA15, BUB1B, FAS, DDIAS, MELK, PUF60, DHCR24	249	567	16792	2.02194	0.999998	0.289647	15.4737
GOTERM_BP_DIRECT	GO:0007093~mitotic cell cycle checkpoint	4	1.41343	0.011511	ZWINT, KNTC1, TTK, BUB1B	249	32	16792	8.42972	1	0.311446	17.1597
GOTERM_BP_DIRECT	GO:0019886~antigen processing and presentation of exogenous peptide antigen via MHC class II	6	2.12014	0.0117236	KIF23, KIF2C, KIF4A, KIF11, KIF15, RACGAP1	249	92	16792	4.39811	1	0.309673	17.4488
GOTERM_BP_DIRECT	GO:0006096~glycolytic process	4	1.41343	0.0135916	GPI, TPI1, DHTKD1, GAPDH	249	34	16792	7.93385	1	0.342661	19.9497
GOTERM_BP_DIRECT	GO:0090307~mitotic spindle assembly	4	1.41343	0.0158721	KIF11, TPX2, BIRC5, MYBL2	249	36	16792	7.49308	1	0.380498	22.9065
GOTERM_BP_DIRECT	GO:0007095~mitotic G2 DNA damage checkpoint	3	1.06007	0.0200975	CDK1, FANCI, TOPBP1	249	15	16792	13.4876	1	0.447601	28.1158
GOTERM_BP_DIRECT	GO:0006271~DNA strand elongation involved in DNA replication	3	1.06007	0.0200975	GINS1, RFC4, PCNA	249	15	16792	13.4876	1	0.447601	28.1158
GOTERM_BP_DIRECT	GO:0000226~microtubule cytoskeleton organization	5	1.76678	0.0208691	CDK1, BIRC5, TUBG1, TACC3, GAPDH	249	71	16792	4.74914	1	0.452559	29.0307
GOTERM_BP_DIRECT	GO:0045184~establishment of protein localization	4	1.41343	0.0210405	KIF14, RCC2, MCC, CEP55	249	40	16792	6.74378	1	0.447887	29.2324
GOTERM_BP_DIRECT	GO:0042787~protein ubiquitination involved in ubiquitin-dependent protein catabolic process	7	2.4735	0.0261906	CCNB1, CDK1, UHRF1, BUB1B, CDC20, PTTG1, UBE2C	249	153	16792	3.08539	1	0.515785	35.049
GOTERM_BP_DIRECT	GO:0032508~DNA duplex unwinding	4	1.41343	0.0270233	RECQL4, GINS1, DNA2, MCM3	249	44	16792	6.1307	1	0.519378	35.9462
GOTERM_BP_DIRECT	GO:0006461~protein complex assembly	6	2.12014	0.0288621	CCNB1, CDK1, SLC2A1, KNTC1, FAS, LAMC1	249	116	16792	3.48816	1	0.535571	37.8863
GOTERM_BP_DIRECT	GO:0071790~establishment of spindle pole body localization to nuclear envelope	2	0.706714	0.0293206	NDC1, SYNE4	249	2	16792	67.4378	1	0.533926	38.3615
GOTERM_BP_DIRECT	GO:0000915~actomyosin contractile ring assembly	2	0.706714	0.0293206	KIF23, RACGAP1	249	2	16792	67.4378	1	0.533926	38.3615
GOTERM_BP_DIRECT	GO:0035984~cellular response to trichostatin A	2	0.706714	0.0293206	MEF2C, EZH2	249	2	16792	67.4378	1	0.533926	38.3615
GOTERM_BP_DIRECT	GO:0000022~mitotic spindle elongation	2	0.706714	0.0293206	KIF23, PRC1	249	2	16792	67.4378	1	0.533926	38.3615
GOTERM_BP_DIRECT	GO:0042276~error-prone translesion synthesis	3	1.06007	0.0314917	RFC4, POLE2, PCNA	249	19	16792	10.6481	1	0.55266	40.5653
GOTERM_BP_DIRECT	GO:0007094~mitotic spindle assembly checkpoint	3	1.06007	0.034656	CENPF, TTK, BUB1B	249	20	16792	10.1157	1	0.580764	43.6453
GOTERM_BP_DIRECT	GO:0016477~cell migration	7	2.4735	0.0428372	FAM83D, CDK1, CTHRC1, RASGEF1A, DEPDC1B, LAMC1, SCRIB	249	172	16792	2.74456	1	0.652969	50.9286
GOTERM_BP_DIRECT	GO:0045652~regulation of megakaryocyte differentiation	2	0.706714	0.0436582	EIF6, MEF2C	249	3	16792	44.9585	1	0.653102	51.6085
GOTERM_BP_DIRECT	GO:1902990~mitotic telomere maintenance via semi-conservative replication	2	0.706714	0.0436582	DNA2, PCNA	249	3	16792	44.9585	1	0.653102	51.6085
GOTERM_BP_DIRECT	GO:0051987~positive regulation of attachment of spindle microtubules to kinetochore	2	0.706714	0.0436582	CCNB1, RCC2	249	3	16792	44.9585	1	0.653102	51.6085
GOTERM_BP_DIRECT	GO:0000083~regulation of transcription involved in G1/S transition of mitotic cell cycle	3	1.06007	0.0448387	CDK1, RRM2, PCNA	249	23	16792	8.79623	1	0.65626	52.5707
GOTERM_BP_DIRECT	GO:0070301~cellular response to hydrogen peroxide	4	1.41343	0.0520023	CDK1, EZH2, PCNA, KLF2	249	57	16792	4.73247	1	0.704919	58.0352
GOTERM_BP_DIRECT	GO:0001578~microtubule bundle formation	3	1.06007	0.0521617	PRC1, PSRC1, KIF20A	249	25	16792	8.09253	1	0.699553	58.1497
GOTERM_BP_DIRECT	GO:0015949~nucleobase-containing small molecule interconversion	3	1.06007	0.0521617	NME1, RRM2, CTPS1	249	25	16792	8.09253	1	0.699553	58.1497
GOTERM_BP_DIRECT	GO:0046686~response to cadmium ion	3	1.06007	0.0521617	CDK1, GPI, PCNA	249	25	16792	8.09253	1	0.699553	58.1497
GOTERM_BP_DIRECT	GO:0000732~strand displacement	3	1.06007	0.055972	DNA2, RAD51AP1, RMI2	249	26	16792	7.78128	1	0.71923	60.803
GOTERM_BP_DIRECT	GO:0061621~canonical glycolysis	3	1.06007	0.055972	GPI, TPI1, GAPDH	249	26	16792	7.78128	1	0.71923	60.803
GOTERM_BP_DIRECT	GO:0007091~metaphase/anaphase transition of mitotic cell cycle	2	0.706714	0.0577849	BUB1B, TACC3	249	4	16792	33.7189	1	0.724723	62.0091
GOTERM_BP_DIRECT	GO:0006564~L-serine biosynthetic process	2	0.706714	0.0577849	SHMT2, PSAT1	249	4	16792	33.7189	1	0.724723	62.0091
GOTERM_BP_DIRECT	GO:0040001~establishment of mitotic spindle localization	2	0.706714	0.0577849	NUSAP1, ESPL1	249	4	16792	33.7189	1	0.724723	62.0091
GOTERM_BP_DIRECT	GO:0051661~maintenance of centrosome location	2	0.706714	0.0577849	GPSM2, ASPM	249	4	16792	33.7189	1	0.724723	62.0091
GOTERM_BP_DIRECT	GO:0043504~mitochondrial DNA repair	2	0.706714	0.0577849	DNA2, MGME1	249	4	16792	33.7189	1	0.724723	62.0091
GOTERM_BP_DIRECT	GO:0061333~renal tubule morphogenesis	2	0.706714	0.0577849	MEF2C, COL4A1	249	4	16792	33.7189	1	0.724723	62.0091
GOTERM_BP_DIRECT	GO:0006977~DNA damage response, signal transduction by p53 class mediator resulting in cell cycle arrest	4	1.41343	0.0637639	CCNB1, CDK1, PCNA, SFN	249	62	16792	4.35082	1	0.754324	65.7449
GOTERM_BP_DIRECT	GO:0045931~positive regulation of mitotic cell cycle	3	1.06007	0.0638718	CCNB1, CDK1, BIRC5	249	28	16792	7.22547	1	0.749115	65.809
GOTERM_BP_DIRECT	GO:0061042~vascular wound healing	2	0.706714	0.0717037	MCAM, NDNF	249	5	16792	26.9751	1	0.78416	70.1748
GOTERM_BP_DIRECT	GO:0044770~cell cycle phase transition	2	0.706714	0.0717037	CDC7, TIMELESS	249	5	16792	26.9751	1	0.78416	70.1748
GOTERM_BP_DIRECT	GO:0000212~meiotic spindle organization	2	0.706714	0.0717037	ESPL1, TUBG1	249	5	16792	26.9751	1	0.78416	70.1748
GOTERM_BP_DIRECT	GO:0006526~arginine biosynthetic process	2	0.706714	0.0717037	ASS1, ASL	249	5	16792	26.9751	1	0.78416	70.1748
GOTERM_BP_DIRECT	GO:0051304~chromosome separation	2	0.706714	0.0717037	TTK, NCAPD2	249	5	16792	26.9751	1	0.78416	70.1748
GOTERM_BP_DIRECT	GO:0010032~meiotic chromosome condensation	2	0.706714	0.0717037	SMC4, NCAPD2	249	5	16792	26.9751	1	0.78416	70.1748
GOTERM_BP_DIRECT	GO:0002244~hematopoietic progenitor cell differentiation	4	1.41343	0.0739763	STON2, ANLN, DHTKD1, TOP2A	249	66	16792	4.08714	1	0.789482	71.3401
GOTERM_BP_DIRECT	GO:0043154~negative regulation of cysteine-type endopeptidase activity involved in apoptotic process	4	1.41343	0.0820814	GPI, BIRC5, SFN, DHCR24	249	69	16792	3.90943	1	0.818926	75.1575
GOTERM_BP_DIRECT	GO:0042493~response to drug	9	3.18021	0.0821571	CCNB1, CDK1, MCM7, ASS1, GGH, CENPF, CTPS1, RAD54L, CBX7	249	304	16792	1.99651	1	0.814328	75.1908
GOTERM_BP_DIRECT	GO:0030855~epithelial cell differentiation	4	1.41343	0.0848648	CDK1, COL4A1, PCNA, BDH2	249	70	16792	3.85359	1	0.820037	76.3545
GOTERM_BP_DIRECT	GO:0021695~cerebellar cortex development	2	0.706714	0.0854178	KIF14, EZH2	249	6	16792	22.4793	1	0.817413	76.5857
GOTERM_BP_DIRECT	GO:0032873~negative regulation of stress-activated MAPK cascade	2	0.706714	0.0854178	FOXM1, PBK	249	6	16792	22.4793	1	0.817413	76.5857
GOTERM_BP_DIRECT	GO:0045143~homologous chromosome segregation	2	0.706714	0.0854178	ESPL1, PTTG1	249	6	16792	22.4793	1	0.817413	76.5857
GOTERM_BP_DIRECT	GO:0045842~positive regulation of mitotic metaphase/anaphase transition	2	0.706714	0.0854178	DLGAP5, ESPL1	249	6	16792	22.4793	1	0.817413	76.5857
GOTERM_BP_DIRECT	GO:0031442~positive regulation of mRNA 3'-end processing	2	0.706714	0.0854178	NCBP2, CCNB1	249	6	16792	22.4793	1	0.817413	76.5857
GOTERM_BP_DIRECT	GO:0006284~base-excision repair	3	1.06007	0.0940933	RECQL4, DNA2, FEN1	249	35	16792	5.78038	1	0.843385	79.9472
GOTERM_BP_DIRECT	GO:0000731~DNA synthesis involved in DNA repair	3	1.06007	0.0940933	DNA2, RAD51AP1, RMI2	249	35	16792	5.78038	1	0.843385	79.9472
GOTERM_BP_DIRECT	GO:0016925~protein sumoylation	5	1.76678	0.0952801	NDC1, CDCA8, PCNA, BIRC5, TOP2A	249	117	16792	2.88196	1	0.842909	80.3701
GOTERM_BP_DIRECT	GO:0030334~regulation of cell migration	4	1.41343	0.0963913	LAMA2, KIF14, SGK1, RCC2	249	74	16792	3.64528	1	0.842211	80.7584
GOTERM_BP_DIRECT	GO:0042769~DNA damage response, detection of DNA damage	3	1.06007	0.0986946	RFC4, DTL, PCNA	249	36	16792	5.61981	1	0.84525	81.5406
GOTERM_BP_DIRECT	GO:0051988~regulation of attachment of spindle microtubules to kinetochore	2	0.706714	0.09893	SPAG5, RACGAP1	249	7	16792	19.2679	1	0.841863	81.6189
GOTERM_BP_DIRECT	GO:1900264~positive regulation of DNA-directed DNA polymerase activity	2	0.706714	0.09893	RFC4, CHTF18	249	7	16792	19.2679	1	0.841863	81.6189
GOTERM_BP_DIRECT	GO:0042908~xenobiotic transport	2	0.706714	0.09893	ABCA8, SLC2A1	249	7	16792	19.2679	1	0.841863	81.6189
GOTERM_BP_DIRECT	GO:0034340~response to type I interferon	2	0.706714	0.09893	SHMT2, ISG15	249	7	16792	19.2679	1	0.841863	81.6189

## Sheet: GO-MF
Category	Term	Count	%	PValue	Genes	List Total	Pop Hits	Pop Total	Fold Enrichment	Bonferroni	Benjamini	FDR
GOTERM_MF_DIRECT	GO:0005515~protein binding	175	61.8375	2.42206e-08	NCBP2, EIF6, MEF2C, STIL, PRC1, CRABP2, KNTC1, TTK, PTTG1, SLC52A2, MCM10, CBX7, PGR, ZGPAT, TMEM147, OGN, CDCA8, ISG15, SLC2A1, ORC6, TUBG1, FAS, CDCA5, CDCA3, S100A2, DDX39A, PRAME, DTL, MPDZ, STIM2, ESPL1, CCDC137, TOPBP1, DEPDC1, TACC3, NCAPD2, CCDC6, UHRF1, RFC4, TNNT1, TIMELESS, RCC2, NME1, SPAG5, TMEM139, ZWINT, INTU, KIF4A, HMGB3, ASS1, LMNB1, PNPT1, CXXC5, MYBL2, ASL, SESN1, SCRIB, TK1, …	253	8785	16881	1.32915	9.80928e-06	9.80928e-06	3.3844e-05
GOTERM_MF_DIRECT	GO:0008017~microtubule binding	15	5.30035	3.02818e-06	KIF14, KIF23, KIF4A, KIF11, PRC1, PSRC1, KIF15, NUSAP1, KIF18B, BIRC5, RACGAP1, FAM83D, RCC2, GAPDH, KIF20A	253	208	16881	4.81178	0.00122566	0.000613019	0.00423127
GOTERM_MF_DIRECT	GO:0003777~microtubule motor activity	9	3.18021	2.53151e-05	KIF23, KIF14, KIF2C, KIF4A, KIF11, KIF15, KIF18B, DYNLRB2, KIF20A	253	80	16881	7.50637	0.0102004	0.00341175	0.0353677
GOTERM_MF_DIRECT	GO:0019901~protein kinase binding	17	6.00707	0.000176205	KIF14, CKS1B, KAT2B, KIF11, PRC1, FOXM1, BORA, TPX2, NBEA, SFN, RACGAP1, TNNI3, FAM83D, CCNB1, RCC2, NME1, KIF20A	253	376	16881	3.01675	0.0688819	0.017684	0.245934
GOTERM_MF_DIRECT	GO:0005524~ATP binding	41	14.4876	0.000207694	ABCA8, KIF23, KIF4A, ASS1, ATP5B, CTPS1, TTK, ATP10D, ABCA5, TK1, KIF2C, MCM7, SBK1, ATP8B1, MASTL, TOP2A, RECQL4, CDC7, DDX39A, KIF14, CDK1, SGK1, KIF11, MKI67, KIF15, TPX2, KIF18B, MCM2, PBK, UBE2C, MCM3, RAD54L, SMC4, DNA2, RFC4, NME1, CHTF18, BUB1B, SLFN13, MELK, KIF20A	253	1495	16881	1.82987	0.0806834	0.0166842	0.289825
GOTERM_MF_DIRECT	GO:0042802~identical protein binding	24	8.48057	0.000871923	DDX39A, SHMT2, ASS1, PRC1, CLDN3, VIM, CTPS1, NDC80, BIRC5, TOPBP1, SFN, MCM10, ASL, TK1, UHRF1, NME1, HJURP, SLC2A1, PCNA, GPSM2, FAS, GAPDH, PUF60, S100A2	253	749	16881	2.138	0.297621	0.0571805	1.21149
GOTERM_MF_DIRECT	GO:0016887~ATPase activity	10	3.53357	0.00174666	KIF23, ABCA8, KIF14, DDX39A, KIF2C, DNA2, ATP5B, KIF15, ABCA5, KIF20A	253	183	16881	3.64608	0.50738	0.0961983	2.4132
GOTERM_MF_DIRECT	GO:0008574~ATP-dependent microtubule motor activity, plus-end-directed	4	1.41343	0.00191456	KIF14, KIF4A, KIF11, KIF18B	253	17	16881	15.6996	0.539821	0.0924598	2.64229
GOTERM_MF_DIRECT	GO:0003678~DNA helicase activity	4	1.41343	0.00527666	DNA2, MCM7, MCM2, MCM3	253	24	16881	11.1206	0.882663	0.211859	7.12609
GOTERM_MF_DIRECT	GO:0003677~DNA binding	39	13.7809	0.00585416	ZMAT1, POLR2H, MEF2C, E2F3, KIF4A, HMGB3, FOXM1, EZH2, ZNF367, CTCFL, RFXANK, MLF2, PGR, MCM7, ZNF512B, POLE2, FANCI, HJURP, ORC6, TOP2A, FEN1, ZBTB20, MKI67, KIF15, NUSAP1, RMI2, TOPBP1, MCM2, MCM3, RAD54L, MYCL, DNA2, RFC4, MEOX1, GTF2IRD1, PCNA, CHTF18, ZFPM2, PUF60	253	1674	16881	1.55449	0.907255	0.211632	7.87669
GOTERM_MF_DIRECT	GO:0043142~single-stranded DNA-dependent ATPase activity	3	1.06007	0.00922966	DNA2, RFC4, CHTF18	253	10	16881	20.017	0.976608	0.289223	12.1525
GOTERM_MF_DIRECT	GO:0003688~DNA replication origin binding	3	1.06007	0.0111704	ORC6, MCM2, MCM10	253	11	16881	18.1973	0.989427	0.315538	14.5266
GOTERM_MF_DIRECT	GO:0019899~enzyme binding	12	4.24028	0.0116817	PGR, RFC4, STC2, PCNA, BIRC5, CDC20, MCM2, MCM10, TOP2A, PUS7, GLDC, DHCR24	253	333	16881	2.40444	0.991425	0.306546	15.1421
GOTERM_MF_DIRECT	GO:0003682~chromatin binding	13	4.59364	0.0147815	MEF2C, CDK1, SHMT2, KAT2B, EZH2, KIAA0101, CENPF, CBX7, NCAPD2, MEOX1, PCNA, CDCA5, TOP2A	253	391	16881	2.21842	0.997597	0.350011	18.7864
GOTERM_MF_DIRECT	GO:0071837~HMG box domain binding	3	1.06007	0.0290183	MEF2C, MEOX1, PRRX1	253	18	16881	11.1206	0.999993	0.548458	33.7332
GOTERM_MF_DIRECT	GO:0042393~histone binding	6	2.12014	0.0361709	CKS1B, UHRF1, HJURP, CTCFL, MCM2, NCAPD2	253	122	16881	3.28147	1	0.606449	40.2376
GOTERM_MF_DIRECT	GO:0043015~gamma-tubulin binding	3	1.06007	0.049388	NDN, NME1, RACGAP1	253	24	16881	8.34042	1	0.700801	50.7242
GOTERM_MF_DIRECT	GO:0008022~protein C-terminus binding	7	2.4735	0.0555783	MKI67, MPDZ, VIM, CENPF, CDC20, TOPBP1, TOP2A	253	182	16881	2.56628	1	0.723793	55.0233
GOTERM_MF_DIRECT	GO:0031014~troponin T binding	2	0.706714	0.0583934	TNNT1, TNNI3	253	4	16881	33.3617	1	0.722663	56.8608
GOTERM_MF_DIRECT	GO:0035173~histone kinase activity	2	0.706714	0.0583934	CCNB1, CDK1	253	4	16881	33.3617	1	0.722663	56.8608
GOTERM_MF_DIRECT	GO:0005200~structural constituent of cytoskeleton	5	1.76678	0.0826179	EPB41L3, CCDC6, VIM, NDC80, TUBG1	253	110	16881	3.03288	1	0.825561	70.0288
GOTERM_MF_DIRECT	GO:0017108~5'-flap endonuclease activity	2	0.706714	0.0863036	DNA2, FEN1	253	6	16881	22.2411	1	0.824597	71.6682
GOTERM_MF_DIRECT	GO:0016628~oxidoreductase activity, acting on the CH-CH group of donors, NAD or NADP as acceptor	2	0.706714	0.0863036	BDH2, DHCR24	253	6	16881	22.2411	1	0.824597	71.6682
GOTERM_MF_DIRECT	GO:0019894~kinesin binding	3	1.06007	0.0958109	FAM83D, PRC1, KIF18B	253	35	16881	5.71914	1	0.843407	75.5207

## Sheet: GO-CC
Category	Term	Count	%	PValue	Genes	List Total	Pop Hits	Pop Total	Fold Enrichment	Bonferroni	Benjamini	FDR
GOTERM_CC_DIRECT	GO:0030496~midbody	17	6.00707	5.90349e-11	KIF14, KIF23, CDK1, KIF4A, PRC1, PSRC1, CENPF, BIRC5, CEP55, RACGAP1, CDCA8, RCC2, SPAG5, SLC2A1, KLHL13, ASPM, KIF20A	265	129	18224	9.06269	1.71792e-08	1.71792e-08	7.85219e-08
GOTERM_CC_DIRECT	GO:0005654~nucleoplasm	83	29.3286	6.34214e-11	MEF2C, NCBP2, KIF23, EIF6, E2F3, PRC1, EZH2, CRABP2, ATP10D, MCM10, RFXANK, CBX7, PGR, CDCA8, MCM7, ISG15, FANCI, PSMD2, ORC6, MASTL, TOP2A, CDCA5, NR2F1, DDX39A, CDC7, CDK1, SGK1, ZBTB20, DTL, TPX2, RMI2, TOPBP1, DEPDC1, MCM2, MCM3, RNASEH2A, UBE2C, NCAPD2, RFC4, TIMELESS, SPAG5, GTF2IRD1, RRM2, ESRP1, ZFPM2, MCC, POLR2H, CKS1B, KIF4A, LMNB1, FOXM1, KIAA0101, ZNF367, ANLN, CXXC5, MYBL2, SCRIB, P…	265	2784	18224	2.05025	1.84557e-08	9.22783e-09	8.43565e-08
GOTERM_CC_DIRECT	GO:0005737~cytoplasm	122	43.1095	1.84802e-09	MEF2C, EIF6, NCBP2, STIL, CTHRC1, PRC1, CRABP2, KNTC1, TTK, PTTG1, MCM10, CBX7, AIF1L, PDRG1, FAS, TUBG1, CDCA5, ASPM, DDX39A, DTL, MPDZ, RMI2, ESPL1, TOPBP1, RNASEH2A, TACC3, METTL7B, NCAPD2, CCDC6, NME1, SPAG5, GTF2IRD1, ZWINT, SPATA17, CELF2, DYNLRB2, INTU, KIF4A, HMGB3, ASS1, PNPT1, CXXC5, ASL, SESN1, SCRIB, CORO2B, SBK1, SAC3D1, DDIAS, GINS1, RECQL4, MKI67, FDPS, CDC20, SYNE4, FAM64A, PRICKL…	265	5222	18224	1.60665	5.37774e-07	1.79258e-07	2.45804e-06
GOTERM_CC_DIRECT	GO:0005634~nucleus	121	42.7562	3.89877e-08	MEF2C, EIF6, NCBP2, PRC1, CRABP2, KNTC1, PTTG1, MCM10, CBX7, GLDC, PGR, ZGPAT, CDCA8, ORC6, FAS, GNL2, CDCA5, ASPM, DDX39A, PRAME, DTL, RMI2, ESPL1, TOPBP1, DEPDC1, NCAPD2, UHRF1, RCC2, TIMELESS, NME1, SPAG5, GTF2IRD1, ZWINT, CELF2, ZNF516, HMGB3, ASS1, SESN1, PUS7, TPI1, DDIAS, GINS1, RECQL4, MKI67, GGH, NUF2, CDC20, NDC80, MCAM, RAD54L, DNA2, FAM64A, CHCHD10, PCNA, CIRBP, KLF2, RPP40, ZMAT1, KI…	265	5415	18224	1.53668	1.13454e-05	2.83635e-06	5.18573e-05
GOTERM_CC_DIRECT	GO:0000922~spindle pole	13	4.59364	6.00103e-08	CCNB1, POC1A, KIF11, PRC1, SPAG5, PSRC1, KNTC1, TPX2, CENPF, GPSM2, CDC20, TOPBP1, TACC3	265	109	18224	8.2019	1.74629e-05	3.4926e-06	7.98193e-05
GOTERM_CC_DIRECT	GO:0005819~spindle	13	4.59364	1.92193e-07	KIF23, KIF11, PRC1, KIF15, PSRC1, TPX2, NUSAP1, CENPF, TTK, CDC20, BIRC5, SAC3D1, KIF20A	265	121	18224	7.38849	5.59265e-05	9.3213e-06	0.000255634
GOTERM_CC_DIRECT	GO:0000775~chromosome, centromeric region	9	3.18021	1.56024e-06	KIF2C, CDCA8, MKI67, HJURP, NUF2, CENPF, NDC80, BIRC5, CDCA5	265	57	18224	10.8584	0.000453928	6.48595e-05	0.00207525
GOTERM_CC_DIRECT	GO:0005876~spindle microtubule	8	2.82686	2.99771e-06	CDK1, KIF4A, KIF11, PRC1, SPAG5, PSRC1, NUSAP1, BIRC5	265	44	18224	12.5036	0.000871954	0.000109036	0.00398716
GOTERM_CC_DIRECT	GO:0000777~condensed chromosome kinetochore	10	3.53357	4.69457e-06	KIF2C, HJURP, SPAG5, ZWINT, KNTC1, NUF2, BUB1B, NDC80, BIRC5, CENPU	265	87	18224	7.90458	0.00136519	0.00015178	0.00624404
GOTERM_CC_DIRECT	GO:0015630~microtubule cytoskeleton	12	4.24028	5.06721e-06	KLK6, CDC7, KIF2C, SHMT2, PRC1, TIMELESS, PSRC1, TPX2, MCM2, TACC3, GAPDH, SPATA7	265	137	18224	6.02363	0.00147348	0.000147445	0.00673966
GOTERM_CC_DIRECT	GO:0005829~cytosol	78	27.5618	7.87519e-06	MEF2C, EIF6, KIF23, NCBP2, STIL, PRC1, BORA, CRABP2, KNTC1, RASGEF1A, NBEA, PTTG1, GLDC, KIF2C, CDCA8, MCM7, ISG15, SLC2A1, PSMD2, FRAT2, FAS, TUBG1, DEPDC1B, DHTKD1, CDCA5, CDCA3, DHCR24, KIF14, CDK1, SGK1, KIF11, KIF15, TPX2, ESPL1, UBE2C, NCAPD2, TNNT1, RCC2, NME1, RRM2, ZWINT, BUB1B, POLR2H, KIF4A, ASS1, NDN, VIM, CTPS1, SFN, ASL, SESN1, HMMR, TK1, ALDH1A1, PEA15, TPI1, NCAPH, NCAPG, BDH2, TS…	265	3315	18224	1.61811	0.00228907	0.000208314	0.0104742
GOTERM_CC_DIRECT	GO:0000796~condensin complex	4	1.41343	2.94186e-05	NCAPH, NCAPG, SMC4, NCAPD2	265	5	18224	55.0158	0.00852441	0.000713158	0.0391225
GOTERM_CC_DIRECT	GO:0005813~centrosome	19	6.71378	5.29281e-05	KIF23, STIL, CDK1, NDN, DTL, KIF15, CENPF, ESPL1, TOPBP1, CDC20, CEP55, MCM3, CCNB1, POC1A, NME1, NCAPG, PCNA, MASTL, TUBG1	265	426	18224	3.0672	0.0152845	0.0011841	0.0703764
GOTERM_CC_DIRECT	GO:0005871~kinesin complex	7	2.4735	0.000113282	KIF23, KIF14, KIF2C, KIF4A, KIF11, KIF18B, KIF20A	265	53	18224	9.08281	0.0324295	0.00235202	0.150571
GOTERM_CC_DIRECT	GO:0005694~chromosome	9	3.18021	0.000144775	RECQL4, KIF4A, HMGB3, DTL, NUSAP1, CCDC137, TOPBP1, CDCA5, SMC4	265	105	18224	5.89456	0.0412573	0.00280489	0.192393
GOTERM_CC_DIRECT	GO:0000776~kinetochore	8	2.82686	0.000172506	KIF2C, KAT2B, SPAG5, ZWINT, CENPF, TTK, BUB1B, NDC80	265	81	18224	6.79208	0.0489641	0.0031328	0.229205
GOTERM_CC_DIRECT	GO:0005874~microtubule	15	5.30035	0.000187818	KIF14, KIF23, KIF4A, KIF11, KIF15, TPX2, NUSAP1, KIF18B, BIRC5, RACGAP1, KIF2C, RCC2, TUBG1, DYNLRB2, KIF20A	265	311	18224	3.31687	0.0531932	0.00321015	0.249528
GOTERM_CC_DIRECT	GO:0045171~intercellular bridge	6	2.12014	0.000420399	KIF23, KLK6, CDC7, CDCA8, CEP55, RFXANK	265	44	18224	9.3777	0.115172	0.00677483	0.557727
GOTERM_CC_DIRECT	GO:0016020~membrane	51	18.0212	0.000782593	ATP5B, LRRC8D, CYC1, TTK, KIF2C, MCM7, FANCI, SLC2A1, PSMD2, ORC6, FAS, GNL2, DHCR24, DDX39A, KIF14, CDK1, KIF11, KIF15, MCM3, NCAPD2, RCC2, NME1, MELK, STON2, KIF4A, LMNB1, MAMDC2, PNPT1, CTPS1, CEP55, MLF2, HMMR, NDC1, CORO2B, NCAPH, LPCAT1, NCAPG, SLC39A7, GAPDH, FEN1, RECQL4, LAPTM4B, PTH2R, MKI67, NUF2, NDC80, TMPRSS4, CCNB1, GPI, SLC4A11, CHTF18	265	2200	18224	1.59421	0.203735	0.0119191	1.03593
GOTERM_CC_DIRECT	GO:0051233~spindle midzone	4	1.41343	0.00245279	KIF14, CDCA8, BUB1B, RACGAP1	265	19	18224	14.4779	0.510631	0.0351011	3.21368
GOTERM_CC_DIRECT	GO:0072686~mitotic spindle	5	1.76678	0.00286127	KIF23, CDK1, SPAG5, ESPL1, RACGAP1	265	41	18224	8.38656	0.565614	0.0389279	3.7395
GOTERM_CC_DIRECT	GO:0042555~MCM complex	3	1.06007	0.00703754	MCM7, MCM2, MCM3	265	9	18224	22.9233	0.871928	0.089186	8.96598
GOTERM_CC_DIRECT	GO:0097431~mitotic spindle pole	3	1.06007	0.0087133	FAM83D, GPSM2, ASPM	265	10	18224	20.6309	0.921659	0.104815	10.9884
GOTERM_CC_DIRECT	GO:0000784~nuclear chromosome, telomeric region	7	2.4735	0.0117132	CDK1, DNA2, MCM7, PCNA, MCM2, MCM3, FEN1	265	130	18224	3.70299	0.967569	0.133125	14.5053
GOTERM_CC_DIRECT	GO:0005814~centriole	6	2.12014	0.0243605	STIL, POC1A, BIRC5, TUBG1, CEP55, TOP2A	265	113	18224	3.65149	0.999236	0.249538	27.9658
GOTERM_CC_DIRECT	GO:0035371~microtubule plus-end	3	1.06007	0.0246383	KIF2C, SPAG5, KIF18B	265	17	18224	12.1358	0.999297	0.243621	28.2381
GOTERM_CC_DIRECT	GO:0031012~extracellular matrix	10	3.53357	0.0290875	LAMA2, OGN, PXDN, COL4A1, ATP5B, VIM, EFEMP1, LAMC1, GAPDH, NDNF	265	296	18224	2.3233	0.999814	0.272505	32.4721
GOTERM_CC_DIRECT	GO:0015629~actin cytoskeleton	8	2.82686	0.0400018	CORO2B, NDC1, NCAPG, AIF1L, KNTC1, ANLN, ORC6, TOPBP1	265	218	18224	2.52366	0.999993	0.345757	41.8995
GOTERM_CC_DIRECT	GO:0097149~centralspindlin complex	2	0.706714	0.042835	KIF23, RACGAP1	265	3	18224	45.8465	0.999997	0.355515	44.1392
GOTERM_CC_DIRECT	GO:0005680~anaphase-promoting complex	3	1.06007	0.0433131	BUB1B, CDC20, UBE2C	265	23	18224	8.96998	0.999997	0.34917	44.5092
GOTERM_CC_DIRECT	GO:0005730~nucleolus	20	7.06714	0.0438238	KLK6, EIF6, STON2, FGF18, MKI67, DTL, PRRX1, NUSAP1, CCDC137, MCM10, CDCA8, FAM64A, TIMELESS, RCC2, HJURP, SAPCD2, CIRBP, GNL2, TOP2A, FEN1	265	857	18224	1.6049	0.999998	0.34339	44.9019
GOTERM_CC_DIRECT	GO:0000793~condensed chromosome	3	1.06007	0.0504046	MKI67, TOP2A, NCAPD2	265	25	18224	8.25238	1	0.375199	49.7377
GOTERM_CC_DIRECT	GO:0016363~nuclear matrix	5	1.76678	0.0525086	KIF4A, UHRF1, LMNB1, KRT8, CENPF	265	97	18224	3.54484	1	0.378507	51.1989
GOTERM_CC_DIRECT	GO:0036064~ciliary basal body	5	1.76678	0.054147	POC1A, CENPF, TUBG1, INTU, SPATA7	265	98	18224	3.50866	1	0.379018	52.3095
GOTERM_CC_DIRECT	GO:0031262~Ndc80 complex	2	0.706714	0.0567031	NUF2, NDC80	265	4	18224	34.3849	1	0.384512	53.9955
GOTERM_CC_DIRECT	GO:0000942~condensed nuclear chromosome outer kinetochore	2	0.706714	0.0567031	CCNB1, NDC80	265	4	18224	34.3849	1	0.384512	53.9955
GOTERM_CC_DIRECT	GO:0032133~chromosome passenger complex	2	0.706714	0.0703711	CDCA8, BIRC5	265	5	18224	27.5079	1	0.445584	62.1132
GOTERM_CC_DIRECT	GO:0005663~DNA replication factor C complex	2	0.706714	0.0838417	RFC4, PCNA	265	6	18224	22.9233	1	0.497769	68.7988
GOTERM_CC_DIRECT	GO:0045120~pronucleus	2	0.706714	0.0971179	EZH2, CENPF	265	7	18224	19.6485	1	0.542673	74.3049

## Sheet: KEGG
Category	Term	Count	%	PValue	Genes	List Total	Pop Hits	Pop Total	Fold Enrichment	Bonferroni	Benjamini	FDR
KEGG_PATHWAY	hsa04110:Cell cycle	15	5.30035	3.69089e-09	CDC7, CDK1, E2F3, TTK, CDC20, ESPL1, PTTG1, SFN, MCM2, MCM3, CCNB1, MCM7, PCNA, BUB1B, ORC6	105	124	6879	7.92512	6.27451e-07	6.27451e-07	4.50282e-06
KEGG_PATHWAY	hsa03030:DNA replication	9	3.18021	4.43566e-08	DNA2, RFC4, MCM7, POLE2, PCNA, MCM2, MCM3, RNASEH2A, FEN1	105	36	6879	16.3786	7.5406e-06	3.77031e-06	5.41143e-05
KEGG_PATHWAY	hsa01230:Biosynthesis of amino acids	7	2.4735	0.000719833	SHMT2, TPI1, ASS1, PSAT1, ASL, GPT2, GAPDH	105	72	6879	6.36944	0.115219	0.0399839	0.874653
KEGG_PATHWAY	hsa00240:Pyrimidine metabolism	8	2.82686	0.000791653	POLR2H, POLE2, NME1, RRM2, PNPT1, CTPS1, DPYD, TK1	105	101	6879	5.18925	0.125964	0.0330984	0.961533
KEGG_PATHWAY	hsa01130:Biosynthesis of antibiotics	11	3.88693	0.00130192	GPI, SHMT2, TPI1, ASS1, NME1, FDPS, AASS, PSAT1, ASL, GAPDH, GLDC	105	212	6879	3.39933	0.19866	0.0433274	1.57679
KEGG_PATHWAY	hsa04115:p53 signaling pathway	6	2.12014	0.00329601	CCNB1, CDK1, RRM2, FAS, SFN, SESN1	105	67	6879	5.86695	0.429502	0.0892994	3.94768
KEGG_PATHWAY	hsa01200:Carbon metabolism	7	2.4735	0.00708174	GPI, SHMT2, TPI1, PSAT1, GPT2, GAPDH, GLDC	105	113	6879	4.05841	0.701259	0.158523	8.3051
KEGG_PATHWAY	hsa05222:Small cell lung cancer	6	2.12014	0.0090442	LAMA2, CKS1B, E2F3, COL4A1, LAMC1, PIK3R3	105	85	6879	4.62454	0.786583	0.17557	10.4918
KEGG_PATHWAY	hsa05166:HTLV-I infection	10	3.53357	0.0143263	E2F3, KAT2B, POLE2, SLC2A1, PCNA, FDPS, BUB1B, CDC20, PTTG1, PIK3R3	105	254	6879	2.5793	0.913972	0.238575	16.1417
KEGG_PATHWAY	hsa01100:Metabolic pathways	28	9.89399	0.0219807	POLR2H, ASS1, ATP5B, NDUFB9, CYC1, AASS, CTPS1, ASL, GLDC, TK1, ALDH1A1, NDUFS6, TPI1, LPCAT1, POLE2, BDH2, TSTA3, GAPDH, GPT2, DHCR24, SHMT2, FDPS, GPI, DGAT1, NME1, RRM2, DPYD, PSAT1	105	1219	6879	1.50484	0.977141	0.314659	23.7499
KEGG_PATHWAY	hsa04114:Oocyte meiosis	6	2.12014	0.0260247	CCNB1, PGR, CDK1, CDC20, ESPL1, PTTG1	105	111	6879	3.54131	0.988698	0.334706	27.5086
KEGG_PATHWAY	hsa00220:Arginine biosynthesis	3	1.06007	0.0360347	ASS1, ASL, GPT2	105	20	6879	9.82714	0.998048	0.40543	36.0925
KEGG_PATHWAY	hsa05200:Pathways in cancer	11	3.88693	0.0724283	LAMA2, CKS1B, CCDC6, FGF18, E2F3, COL4A1, SLC2A1, BIRC5, FAS, LAMC1, PIK3R3	105	393	6879	1.83373	0.999997	0.625884	60.0382
KEGG_PATHWAY	hsa03410:Base excision repair	3	1.06007	0.0883259	POLE2, PCNA, FEN1	105	33	6879	5.95584	1	0.67466	67.6369
KEGG_PATHWAY	hsa00250:Alanine, aspartate and glutamate metabolism	3	1.06007	0.0976481	ASS1, ASL, GPT2	105	35	6879	5.61551	1	0.687924	71.4508
