# Supplementary material for: Identification of core genes for early diagnosis and the EMT modulation of ovarian serous cancer by bioinformatics perspective
Source: Aging (Albany NY). 2021 Jan 25;13(2):3112–45. doi: 10.18632/aging.202524 (PMC7880353; doi:10.18632/aging.202524)
Supplement: Supplementary Table 8 [file aging-13-202524-s006.xlsx]

## Sheet: GSE31568
Supplementary Table 8. The details of differential expression for miRNAs from GSE31568.
ID	adj.P.Val	P.Value	t	B	logFC	SEQUENCE	miRNA_ID	Style
hsa-miR-342-3p	0.00639	7.41e-06	-4.76744	3.544	-1.06138	ucucacacagaaaucgcacccgu	hsa-miR-342-3p	Down
hsa-miR-150	0.01347	3.121e-05	-4.39402	2.242	-1.98237	ucucccaacccuuguaccagug	hsa-miR-150	Down
hsa-miR-1248	0.01399	6.327e-05	-4.20397	1.604	-2.63369	accuucuuguauaagcacugugcuaaa	hsa-miR-1248	Down
hsa-miR-23b*	0.01399	6.483e-05	-4.19733	1.582	-2.69597	uggguuccuggcaugcugauuu	hsa-miR-23b*	Down
hsa-miR-320a	0.02093	0.00012129	-4.02453	1.019	-0.795238	aaaagcuggguugagagggcga	hsa-miR-320a	Down
hsa-miR-1224-3p	0.031	0.00021553	-3.86196	0.503	-2.4361	ccccaccuccucucuccucag	hsa-miR-1224-3p	Down
hsa-miR-133b	0.05079	0.00045867	-3.64186	-0.172	-2.46739	uuugguccccuucaaccagcua	hsa-miR-133b	Down
hsa-miR-450b-3p	0.05079	0.00047085	-3.63408	-0.195	-2.20374	uugggaucauuuugcauccaua	hsa-miR-450b-3p	Down
hsa-miR-889	0.07793	0.00095205	-3.42082	-0.82	-2.01625	uuaauaucggacaaccauugu	hsa-miR-889	Down
hsa-miR-744*	0.07793	0.00098292	-3.41096	-0.848	-2.08149	cuguugccacuaaccucaaccu	hsa-miR-744*	Down
hsa-miR-182	0.07793	0.00099335	3.40769	-0.858	0.920278	uuuggcaaugguagaacucacacu	hsa-miR-182	Up
hsa-miR-302c	0.08427	0.00126435	-3.33247	-1.071	-2.18573	uaagugcuuccauguuucagugg	hsa-miR-302c	Down
hsa-miR-297	0.08427	0.00128682	3.32693	-1.086	1.63872	auguaugugugcaugugcaug	hsa-miR-297	Up
hsa-miR-1183	0.08427	0.00137697	3.3056	-1.146	1.06991	cacuguaggugauggugagagugggca	hsa-miR-1183	Up
hsa-miR-1281	0.08427	0.00146474	-3.28605	-1.201	-2.10763	ucgccuccuccucuccc	hsa-miR-1281	Down
hsa-miR-26b*	0.0856	0.00171823	-3.2352	-1.341	-2.09646	ccuguucuccauuacuuggcuc	hsa-miR-26b*	Down
hsa-miR-559	0.0856	0.00183301	-3.21446	-1.398	-1.63705	uaaaguaaauaugcaccaaaa	hsa-miR-559	Down
hsa-miR-383	0.0856	0.00186178	3.20944	-1.412	1.72253	agaucagaaggugauuguggcu	hsa-miR-383	Up
hsa-miR-337-3p	0.0856	0.00201589	-3.18378	-1.481	-2.22285	cuccuauaugaugccuuucuuc	hsa-miR-337-3p	Down
hsa-miR-520a-3p	0.0856	0.00202611	-3.18214	-1.486	-2.00008	aaagugcuucccuuuggacugu	hsa-miR-520a-3p	Down
hsa-miR-668	0.0856	0.00225232	-3.14777	-1.579	-1.73901	ugucacucggcucggcccacuac	hsa-miR-668	Down
hsa-miR-513c	0.0856	0.00226261	3.14628	-1.583	2.09141	uucucaaggaggugucguuuau	hsa-miR-513c	Up
hsa-miR-605	0.0856	0.00228131	-3.14359	-1.59	-2.06617	uaaaucccauggugccuucuccu	hsa-miR-605	Down
hsa-miR-299-5p	0.08926	0.0025686	-3.10474	-1.694	-2.02991	ugguuuaccgucccacauacau	hsa-miR-299-5p	Down
hsa-miR-1259	0.08926	0.00258573	-3.10255	-1.7	-2.31454	auauaugaugacuuagcuuuu	hsa-miR-1259	Down
hsa-miR-618	0.10013	0.00301675	-3.05154	-1.834	-2.32866	aaacucuacuuguccuucugagu	hsa-miR-618	Down
hsa-miR-324-3p	0.10372	0.00327711	-3.02391	-1.907	-0.773162	acugccccaggugcugcugg	hsa-miR-324-3p	Down
hsa-miR-885-3p	0.10372	0.00336526	3.01502	-1.93	0.940001	aggcagcgggguguaguggaua	hsa-miR-885-3p	Up
hsa-miR-206	0.1123	0.00378331	2.97557	-2.032	2.27894	uggaauguaaggaagugugugg	hsa-miR-206	Up
hsa-miR-409-3p	0.1123	0.00390366	-2.96497	-2.059	-2.18341	gaauguugcucggugaaccccu	hsa-miR-409-3p	Down
hsa-miR-423-5p	0.13454	0.00487758	-2.88877	-2.252	-0.677526	ugaggggcagagagcgagacuuu	hsa-miR-423-5p	Down
hsa-miR-590-3p	0.13454	0.00498864	-2.881	-2.272	-1.87247	uaauuuuauguauaagcuagu	hsa-miR-590-3p	Down
hsa-miR-219-1-3p	0.13894	0.00536811	-2.85558	-2.335	-1.99417	agaguugagucuggacgucccg	hsa-miR-219-1-3p	Down
hsa-miR-181a	0.13894	0.00547397	-2.84878	-2.352	-1.09111	aacauucaacgcugucggugagu	hsa-miR-181a	Down
hsa-miR-32*	0.14495	0.00652131	2.78736	-2.503	1.84525	caauuuagugugugugauauuu	hsa-miR-32*	Up
hsa-miR-454*	0.14495	0.00656358	-2.78508	-2.509	-1.83198	acccuaucaauauugucucugc	hsa-miR-454*	Down
hsa-miR-135b	0.14495	0.00662622	-2.78172	-2.517	-1.76111	uauggcuuuucauuccuauguga	hsa-miR-135b	Down
hsa-miR-548i	0.14495	0.00664878	-2.78051	-2.52	-1.76973	aaaaguaauugcggauuuugcc	hsa-miR-548i	Down
hsa-miR-526a	0.14495	0.00674406	2.77547	-2.532	1.00128	cucuagagggaagcacuuucug	hsa-miR-526a	Up
hsa-miR-518d-5p	0.14495	0.00677683	2.77375	-2.536	0.896495	cucuagagggaagcacuuucug	hsa-miR-518d-5p	Up
hsa-miR-1265	0.14495	0.00689904	2.76741	-2.552	2.20263	caggauguggucaaguguuguu	hsa-miR-1265	Up
hsa-miR-664	0.14495	0.00705444	-2.75949	-2.571	-1.67451	uauucauuuauccccagccuaca	hsa-miR-664	Down
hsa-miR-301b	0.14586	0.00741454	2.74174	-2.614	0.716924	cagugcaaugauauugucaaagc	hsa-miR-301b	Up
hsa-miR-15a	0.14586	0.0074807	2.73856	-2.621	0.911034	uagcagcacauaaugguuugug	hsa-miR-15a	Up
hsa-miR-610	0.14586	0.00760583	2.73263	-2.635	1.54898	ugagcuaaaugugugcuggga	hsa-miR-610	Up
hsa-miR-655	0.14785	0.00788058	-2.7199	-2.666	-1.96849	auaauacaugguuaaccucuuu	hsa-miR-655	Down
hsa-miR-891a	0.15714	0.00855796	2.69016	-2.737	0.719725	ugcaacgaaccugagccacuga	hsa-miR-891a	Up
hsa-miR-545*	0.17135	0.00953068	-2.651	-2.829	-1.63244	ucaguaaauguuuauuagauga	hsa-miR-545*	Down
hsa-miR-574-5p	0.17648	0.0100203	2.63265	-2.871	1.04073	ugagugugugugugugagugugu	hsa-miR-574-5p	Up
hsa-miR-412	0.17797	0.0106873	-2.60891	-2.926	-0.938823	acuucaccugguccacuagccgu	hsa-miR-412	Down
hsa-miR-942	0.17797	0.0107188	-2.60782	-2.929	-1.91655	ucuucucuguuuuggccaugug	hsa-miR-942	Down
hsa-miR-576-3p	0.17797	0.0107234	-2.60766	-2.929	-1.62572	aagauguggaaaaauuggaauc	hsa-miR-576-3p	Down
hsa-miR-543	0.2211	0.0135783	-2.5194	-3.13	-1.40692	aaacauucgcggugcacuucuu	hsa-miR-543	Down
hsa-miR-335*	0.23283	0.0147937	-2.48682	-3.202	-1.64812	uuuuucauuauugcuccugacc	hsa-miR-335*	Down
hsa-miR-1299	0.23283	0.0148385	2.48567	-3.205	1.77475	uucuggaauucugugugaggga	hsa-miR-1299	Up
hsa-miR-152	0.2434	0.0158279	2.46094	-3.259	0.740716	ucagugcaugacagaacuugg	hsa-miR-152	Up
hsa-miR-518f	0.2434	0.0161814	2.45244	-3.278	1.34916	gaaagcgcuucucuuuagagg	hsa-miR-518f	Up
hsa-miR-22	0.2434	0.0164366	2.44641	-3.291	0.413424	aagcugccaguugaagaacugu	hsa-miR-22	Up
hsa-miR-518a-5p	0.2434	0.0167846	2.43831	-3.309	0.758038	cugcaaagggaagcccuuuc	hsa-miR-518a-5p	Up
hsa-let-7e*	0.2434	0.0169221	-2.43515	-3.316	-1.6758	cuauacggccuccuagcuuucc	hsa-let-7e*	Down
hsa-miR-1252	0.25024	0.0176879	-2.41798	-3.353	-1.79447	agaaggaaauugaauucauuua	hsa-miR-1252	Down
hsa-miR-573	0.26281	0.0188808	2.39251	-3.408	1.04511	cugaagugauguguaacugaucag	hsa-miR-573	Up
hsa-miR-520a-5p	0.26284	0.0191877	2.38618	-3.421	0.74468	cuccagagggaaguacuuucu	hsa-miR-520a-5p	Up
hsa-miR-16	0.26374	0.0195593	2.37865	-3.437	0.400982	uagcagcacguaaauauuggcg	hsa-miR-16	Up
hsa-miR-433	0.26965	0.0203096	2.36381	-3.469	1.38016	aucaugaugggcuccucggugu	hsa-miR-433	Up
hsa-miR-576-5p	0.27311	0.0209634	-2.35128	-3.495	-1.56781	auucuaauuucuccacgucuuu	hsa-miR-576-5p	Down
hsa-miR-941	0.27311	0.021203	2.34677	-3.505	0.428229	cacccggcugugugcacaugugc	hsa-miR-941	Up
hsa-miR-708*	0.27344	0.0215456	2.3404	-3.518	1.18785	caacuagacugugagcuucuag	hsa-miR-708*	Up
hsa-miR-1322	0.29184	0.0233336	2.30856	-3.585	1.35332	gaugaugcugcugaugcug	hsa-miR-1322	Up
hsa-miR-15b	0.29282	0.0241906	2.29405	-3.615	0.584684	uagcagcacaucaugguuuaca	hsa-miR-15b	Up
hsa-miR-518f*	0.29282	0.0242936	2.29234	-3.618	0.65339	cucuagagggaagcacuuucuc	hsa-miR-518f*	Up
hsa-miR-220b	0.29282	0.0246324	2.28675	-3.63	1.45471	ccaccaccgugucugacacuu	hsa-miR-220b	Up
hsa-miR-519c-5p	0.29282	0.0247694	2.28451	-3.634	0.748517	cucuagagggaagcgcuuucug	hsa-miR-519c-5p	Up
hsa-miR-522	0.29292	0.0251171	-2.27887	-3.646	-1.63025	aaaaugguucccuuuagagugu	hsa-miR-522	Down
hsa-miR-365	0.30828	0.0267917	-2.25264	-3.699	-0.952982	uaaugccccuaaaaauccuuau	hsa-miR-365	Down
hsa-miR-1261	0.31433	0.0277462	-2.23833	-3.728	-1.38872	auggauaaggcuuuggcuu	hsa-miR-1261	Down
hsa-miR-578	0.31433	0.0280452	-2.23394	-3.737	-1.51476	cuucuugugcucuaggauugu	hsa-miR-578	Down
hsa-miR-411*	0.31443	0.0289748	-2.22053	-3.764	-1.06536	uauguaacacgguccacuaacc	hsa-miR-411*	Down
hsa-miR-571	0.31443	0.0291804	2.21762	-3.77	0.971546	ugaguuggccaucugagugag	hsa-miR-571	Up
hsa-miR-1184	0.31443	0.0294014	2.21451	-3.776	0.714506	ccugcagcgacuugauggcuucc	hsa-miR-1184	Up
hsa-miR-224	0.31443	0.0295119	2.21296	-3.779	1.36738	caagucacuagugguuccguu	hsa-miR-224	Up
hsa-miR-376b	0.31501	0.0299316	2.20712	-3.791	1.47361	aucauagaggaaaauccauguu	hsa-miR-376b	Up
hsa-miR-758	0.31797	0.0313496	-2.18792	-3.829	-1.68287	uuugugaccugguccacuaacc	hsa-miR-758	Down
hsa-miR-580	0.31797	0.0315117	-2.18578	-3.834	-1.3367	uugagaaugaugaaucauuagg	hsa-miR-580	Down
hsa-miR-520c-5p	0.31797	0.0318406	2.18145	-3.842	0.754135	cucuagagggaagcacuuucug	hsa-miR-520c-5p	Up
hsa-miR-1236	0.31797	0.0323666	-2.17462	-3.856	-1.61719	ccucuuccccuugucucuccag	hsa-miR-1236	Down
hsa-miR-600	0.31797	0.0324193	-2.17394	-3.857	-1.17603	acuuacagacaagagccuugcuc	hsa-miR-600	Down
hsa-miR-1289	0.31797	0.0325911	2.17173	-3.861	0.769311	uggaguccaggaaucugcauuuu	hsa-miR-1289	Up
hsa-miR-125b-2*	0.31797	0.0329634	2.16698	-3.871	1.51063	ucacaagucaggcucuugggac	hsa-miR-125b-2*	Up
hsa-miR-320b	0.31797	0.0338419	-2.15594	-3.892	-0.583096	aaaagcuggguugagagggcaa	hsa-miR-320b	Down
hsa-miR-490-3p	0.31797	0.0339494	2.15461	-3.895	0.464283	caaccuggaggacuccaugcug	hsa-miR-490-3p	Up
hsa-miR-1205	0.31797	0.0340653	2.15318	-3.898	0.843681	ucugcaggguuugcuuugag	hsa-miR-1205	Up
hsa-miR-133a	0.31797	0.0344957	-2.1479	-3.908	-1.21949	uuugguccccuucaaccagcug	hsa-miR-133a	Down
hsa-miR-548h	0.31797	0.0346336	-2.14622	-3.911	-1.47928	aaaaguaaucgcgguuuuuguc	hsa-miR-548h	Down
hsa-miR-613	0.31884	0.0351516	-2.13995	-3.923	-1.63444	aggaauguuccuucuuugcc	hsa-miR-613	Down
hsa-miR-500	0.31884	0.0357784	-2.13248	-3.938	-1.07948	uaauccuugcuaccugggugaga	hsa-miR-500	Down
hsa-miR-548k	0.31884	0.0358371	-2.13179	-3.939	-1.43117	aaaaguacuugcggauuuugcu	hsa-miR-548k	Down
hsa-miR-298	0.32738	0.0374981	2.11255	-3.976	0.807176	agcagaagcagggagguucuccca	hsa-miR-298	Up
hsa-miR-922	0.32738	0.0375562	2.11189	-3.977	1.02147	gcagcagagaauaggacuacguc	hsa-miR-922	Up
hsa-miR-34b	0.32739	0.0379731	-2.10719	-3.986	-1.28516	caaucacuaacuccacugccau	hsa-miR-34b	Down
hsa-miR-582-5p	0.32739	0.0383153	-2.10336	-3.994	-1.51769	uuacaguuguucaaccaguuacu	hsa-miR-582-5p	Down
hsa-miR-579	0.33886	0.0400509	-2.08438	-4.03	-1.25076	uucauuugguauaaaccgcgauu	hsa-miR-579	Down
hsa-miR-542-3p	0.34177	0.0410355	2.07393	-4.05	1.04516	ugugacagauugauaacugaaa	hsa-miR-542-3p	Up
hsa-miR-342-5p	0.34177	0.0411863	-2.07234	-4.053	-0.873856	aggggugcuaucugugauuga	hsa-miR-342-5p	Down
hsa-miR-564	0.34422	0.0420669	2.0632	-4.07	0.566453	aggcacggugucagcaggc	hsa-miR-564	Up
hsa-miR-183	0.34422	0.0422797	2.06102	-4.074	0.730141	uauggcacugguagaauucacu	hsa-miR-183	Up
hsa-miR-204	0.34516	0.0427954	-2.05577	-4.084	-1.32287	uucccuuugucauccuaugccu	hsa-miR-204	Down
hsa-miR-934	0.34566	0.044078	-2.04294	-4.108	-0.706471	ugucuacuacuggagacacugg	hsa-miR-934	Down
hsa-miR-483-3p	0.34566	0.0442088	-2.04165	-4.11	-1.5586	ucacuccucuccucccgucuu	hsa-miR-483-3p	Down
hsa-miR-892b	0.34566	0.0444595	-2.03918	-4.115	-1.25489	cacuggcuccuuucuggguaga	hsa-miR-892b	Down
hsa-miR-9	0.34566	0.0448545	-2.03532	-4.122	-1.31512	ucuuugguuaucuagcuguauga	hsa-miR-9	Down
hsa-miR-26a-1*	0.34566	0.0448603	-2.03527	-4.122	-1.41513	ccuauucuugguuacuugcacg	hsa-miR-26a-1*	Down
hsa-miR-651	0.3521	0.046104	-2.02331	-4.144	-1.44268	uuuaggauaagcuugacuuuug	hsa-miR-651	Down
hsa-miR-155	0.35398	0.0473757	-2.01136	-4.166	-0.782724	uuaaugcuaaucgugauaggggu	hsa-miR-155	Down
hsa-miR-1308	0.35398	0.0477609	2.00779	-4.173	1.30781	gcaugggugguucagugg	hsa-miR-1308	Up
hsa-miR-153	0.35398	0.0480247	2.00536	-4.177	0.65336	uugcauagucacaaaagugauc	hsa-miR-153	Up
hsa-miR-363*	0.35398	0.0483384	2.00249	-4.182	0.830802	cggguggaucacgaugcaauuu	hsa-miR-363*	Up
hsa-miR-509-3-5p	0.35398	0.0484009	2.00192	-4.183	0.695175	uacugcagacguggcaaucaug	hsa-miR-509-3-5p	Up
hsa-miR-186*	0.35864	0.0496707	1.99047	-4.204	0.820852	gcccaaaggugaauuuuuuggg	hsa-miR-186*	Up
hsa-miR-519a*	0.35864	0.0500205	1.98736	-4.21	0.953254	cucuagagggaagcgcuuucug	hsa-miR-519a*	Up
hsa-miR-936	0.35864	0.0505726	1.98249	-4.219	0.788302	acaguagagggaggaaucgcag	hsa-miR-936	Up
hsa-miR-581	0.35864	0.0507003	-1.98137	-4.221	-1.36317	ucuuguguucucuagaucagu	hsa-miR-581	Down
hsa-miR-497	0.36041	0.051612	1.97344	-4.235	0.616615	cagcagcacacugugguuugu	hsa-miR-497	Up
hsa-miR-323-5p	0.36041	0.051785	1.97195	-4.238	1.27873	aggugguccguggcgcguucgc	hsa-miR-323-5p	Up
hsa-miR-19a	0.36397	0.0527193	1.96397	-4.252	0.64784	ugugcaaaucuaugcaaaacuga	hsa-miR-19a	Up
hsa-miR-128	0.36414	0.0531653	1.9602	-4.259	0.473664	ucacagugaaccggucucuuu	hsa-miR-128	Up
hsa-miR-1202	0.36532	0.0537613	1.95521	-4.268	0.748734	gugccagcugcagugggggag	hsa-miR-1202	Up
hsa-miR-720	0.37658	0.055854	-1.93804	-4.298	-0.567649	ucucgcuggggccucca	hsa-miR-720	Down
hsa-miR-635	0.38328	0.0572929	1.92655	-4.319	0.473289	acuugggcacugaaacaaugucc	hsa-miR-635	Up
hsa-miR-1279	0.39113	0.0591249	-1.91227	-4.344	-1.25388	ucauauugcuucuuucu	hsa-miR-1279	Down
hsa-miR-34b*	0.39113	0.0593717	1.91037	-4.347	0.881534	uaggcagugucauuagcugauug	hsa-miR-34b*	Up
hsa-miR-30a*	0.39156	0.0601188	-1.90467	-4.357	-1.12491	cuuucagucggauguuugcagc	hsa-miR-30a*	Down
hsa-miR-99b*	0.39156	0.0603441	1.90297	-4.36	0.901136	caagcucgugucuguggguccg	hsa-miR-99b*	Up
hsa-miR-1538	0.39208	0.0611766	1.89671	-4.371	0.880158	cggcccgggcugcugcuguuccu	hsa-miR-1538	Up
hsa-miR-363	0.39208	0.0613339	1.89554	-4.373	0.799209	aauugcacgguauccaucugua	hsa-miR-363	Up
hsa-miR-98	0.39671	0.063216	-1.88168	-4.397	-1.54007	ugagguaguaaguuguauuguu	hsa-miR-98	Down
hsa-miR-1298	0.39671	0.0632368	-1.88152	-4.397	-1.27451	uucauucggcuguccagaugua	hsa-miR-1298	Down
hsa-miR-585	0.39671	0.0635825	-1.87902	-4.402	-1.27422	ugggcguaucuguaugcua	hsa-miR-585	Down
hsa-miR-382	0.39671	0.063896	1.87675	-4.405	1.56162	gaaguuguucgugguggauucg	hsa-miR-382	Up
hsa-miR-1255a	0.40068	0.0650007	1.86885	-4.419	1.15811	aggaugagcaaagaaaguagauu	hsa-miR-1255a	Up
hsa-miR-300	0.40408	0.0666735	-1.85709	-4.439	-1.07939	uauacaagggcagacucucucu	hsa-miR-300	Down
hsa-miR-1471	0.40408	0.0669446	1.85521	-4.442	0.485926	gcccgcguguggagccaggugu	hsa-miR-1471	Up
hsa-miR-760	0.40408	0.0672391	1.85318	-4.446	1.35848	cggcucugggucugugggga	hsa-miR-760	Up
hsa-miR-494	0.40408	0.0674249	-1.8519	-4.448	-0.995832	ugaaacauacacgggaaaccuc	hsa-miR-494	Down
hsa-miR-140-3p	0.40504	0.0680551	1.84757	-4.455	0.247063	uaccacaggguagaaccacgg	hsa-miR-140-3p	Up
hsa-miR-320c	0.40857	0.069135	-1.84024	-4.468	-0.563028	aaaagcuggguugagagggu	hsa-miR-320c	Down
hsa-miR-658	0.40857	0.0699839	1.83454	-4.477	1.05302	ggcggagggaaguagguccguuggu	hsa-miR-658	Up
hsa-miR-26a-2*	0.40857	0.0702455	-1.8328	-4.48	-1.11112	ccuauucuugauuacuuguuuc	hsa-miR-26a-2*	Down
hsa-miR-10a*	0.40857	0.0705406	-1.83084	-4.484	-1.10478	caaauucguaucuaggggaaua	hsa-miR-10a*	Down
hsa-miR-770-5p	0.41065	0.0713762	1.82532	-4.493	0.717353	uccaguaccacgugucagggcca	hsa-miR-770-5p	Up
hsa-miR-302d*	0.41204	0.0724293	-1.81845	-4.504	-1.02218	acuuuaacauggaggcacuugc	hsa-miR-302d*	Down
hsa-miR-146b-3p	0.41204	0.0725723	1.81752	-4.506	0.821505	ugcccuguggacucaguucugg	hsa-miR-146b-3p	Up
hsa-miR-1295	0.41226	0.0733425	1.81255	-4.514	0.67648	uuaggccgcagaucuggguga	hsa-miR-1295	Up
hsa-miR-107	0.41226	0.0740113	1.80827	-4.521	0.665416	agcagcauuguacagggcuauca	hsa-miR-107	Up
hsa-miR-148a*	0.41226	0.0744218	-1.80566	-4.526	-1.26212	aaaguucugagacacuccgacu	hsa-miR-148a*	Down
hsa-miR-767-5p	0.41226	0.075197	1.80077	-4.534	0.539081	ugcaccaugguugucugagcaug	hsa-miR-767-5p	Up
hsa-miR-589	0.41226	0.0753578	1.79976	-4.536	0.599159	ugagaaccacgucugcucugag	hsa-miR-589	Up
hsa-miR-589*	0.41226	0.0767796	1.7909	-4.55	0.607271	ucagaacaaaugccgguucccaga	hsa-miR-589*	Up
hsa-miR-320d	0.41226	0.0768909	-1.79021	-4.551	-0.608602	aaaagcuggguugagagga	hsa-miR-320d	Down
hsa-miR-523*	0.41226	0.0769887	1.78961	-4.552	0.700531	cucuagagggaagcgcuuucug	hsa-miR-523*	Up
hsa-miR-933	0.41226	0.0770614	1.78916	-4.553	0.882946	ugugcgcagggagaccucuccc	hsa-miR-933	Up
hsa-miR-1249	0.41226	0.0773883	-1.78715	-4.556	-1.22066	acgcccuucccccccuucuuca	hsa-miR-1249	Down
hsa-miR-142-3p	0.41391	0.0781774	-1.78232	-4.564	-1.40393	uguaguguuuccuacuuuaugga	hsa-miR-142-3p	Down
hsa-miR-1301	0.41424	0.0787199	1.77903	-4.57	0.766277	uugcagcugccugggagugacuuc	hsa-miR-1301	Up
hsa-miR-548b-5p	0.4177	0.0805768	-1.76789	-4.588	-1.10593	aaaaguaauugugguuuuggcc	hsa-miR-548b-5p	Down
hsa-miR-877*	0.4177	0.0816164	-1.76175	-4.598	-1.32548	uccucuucucccuccucccag	hsa-miR-877*	Down
hsa-miR-431	0.4177	0.0823942	1.7572	-4.605	0.713698	ugucuugcaggccgucaugca	hsa-miR-431	Up
hsa-miR-501-5p	0.4177	0.0829126	-1.75418	-4.61	-1.19721	aauccuuugucccugggugaga	hsa-miR-501-5p	Down
hsa-miR-539	0.4177	0.083718	-1.74953	-4.618	-1.12937	ggagaaauuauccuuggugugu	hsa-miR-539	Down
hsa-miR-649	0.4177	0.083924	-1.74834	-4.62	-1.18344	aaaccuguguuguucaagaguc	hsa-miR-649	Down
hsa-miR-769-3p	0.4177	0.0843439	1.74594	-4.624	1.23445	cugggaucuccggggucuugguu	hsa-miR-769-3p	Up
hsa-miR-190	0.4177	0.0844587	-1.74528	-4.625	-1.10258	ugauauguuugauauauuaggu	hsa-miR-190	Down
hsa-miR-106b*	0.4177	0.0853722	1.74008	-4.633	0.401759	ccgcacuguggguacuugcugc	hsa-miR-106b*	Up
hsa-miR-1262	0.4177	0.0866904	-1.73267	-4.645	-1.11099	augggugaauuuguagaaggau	hsa-miR-1262	Down
hsa-miR-1203	0.4177	0.0872612	1.72948	-4.65	0.471125	cccggagccaggaugcagcuc	hsa-miR-1203	Up
hsa-miR-19b	0.4177	0.0882136	1.72421	-4.658	0.495065	ugugcaaauccaugcaaaacuga	hsa-miR-19b	Up
hsa-miR-211	0.4177	0.0886531	-1.72179	-4.662	-1.047	uucccuuugucauccuucgccu	hsa-miR-211	Down
hsa-miR-875-3p	0.4177	0.088877	1.72056	-4.664	1.02513	ccuggaaacacugagguugug	hsa-miR-875-3p	Up
hsa-let-7f-1*	0.4177	0.0897374	-1.71587	-4.672	-1.18906	cuauacaaucuauugccuuccc	hsa-let-7f-1*	Down
hsa-miR-147	0.4177	0.0903928	1.71231	-4.677	1.14534	guguguggaaaugcuucugc	hsa-miR-147	Up
hsa-miR-1324	0.4177	0.0905061	1.7117	-4.678	0.414088	ccagacagaauucuaugcacuuuc	hsa-miR-1324	Up
hsa-miR-1228*	0.4177	0.0905804	1.7113	-4.679	0.60938	gugggcgggggcaggugugug	hsa-miR-1228*	Up
hsa-miR-506	0.4177	0.0907146	-1.71058	-4.68	-1.10417	uaaggcacccuucugaguaga	hsa-miR-506	Down
hsa-miR-593*	0.4177	0.090763	1.71032	-4.68	0.508043	aggcaccagccaggcauugcucagc	hsa-miR-593*	Up
hsa-miR-522*	0.4177	0.0911051	1.70848	-4.683	0.593789	cucuagagggaagcgcuuucug	hsa-miR-522*	Up
hsa-miR-23b	0.4177	0.0912237	1.70784	-4.684	0.26737	aucacauugccagggauuacc	hsa-miR-23b	Up
hsa-miR-190b	0.4177	0.0912718	-1.70758	-4.685	-1.18138	ugauauguuugauauuggguu	hsa-miR-190b	Down
hsa-miR-516a-5p	0.4177	0.091401	1.70689	-4.686	0.590954	uucucgaggaaagaagcacuuuc	hsa-miR-516a-5p	Up
hsa-miR-140-5p	0.4177	0.0915442	1.70612	-4.687	1.17824	cagugguuuuacccuaugguag	hsa-miR-140-5p	Up
hsa-miR-509-5p	0.4177	0.0919625	1.70389	-4.691	0.878807	uacugcagacaguggcaauca	hsa-miR-509-5p	Up
hsa-miR-532-3p	0.41862	0.0933971	-1.6963	-4.703	-0.375712	ccucccacacccaaggcuugca	hsa-miR-532-3p	Down
hsa-miR-516b*	0.41862	0.0934414	-1.69606	-4.703	-1.20488	ugcuuccuuucagagggu	hsa-miR-516b*	Down
hsa-miR-650	0.41862	0.0941556	1.69232	-4.709	0.538776	aggaggcagcgcucucaggac	hsa-miR-650	Up
hsa-miR-1268	0.41862	0.0943503	1.6913	-4.71	0.893988	cgggcguggugguggggg	hsa-miR-1268	Up
hsa-miR-203	0.41862	0.0949043	-1.68842	-4.715	-1.13831	gugaaauguuuaggaccacuag	hsa-miR-203	Down
hsa-miR-362-5p	0.41862	0.0950743	-1.68754	-4.716	-0.561337	aauccuuggaaccuaggugugagu	hsa-miR-362-5p	Down
hsa-miR-195*	0.41871	0.0971387	1.67692	-4.733	0.978142	ccaauauuggcugugcugcucc	hsa-miR-195*	Up
hsa-miR-95	0.41871	0.0972758	1.67623	-4.734	1.11403	uucaacggguauuuauugagca	hsa-miR-95	Up
hsa-miR-485-5p	0.41871	0.0975563	1.6748	-4.736	0.93548	agaggcuggccgugaugaauuc	hsa-miR-485-5p	Up
hsa-miR-574-3p	0.41871	0.0979233	-1.67294	-4.739	-0.425966	cacgcucaugcacacacccaca	hsa-miR-574-3p	Down
hsa-miR-323-3p	0.41871	0.0980078	-1.67251	-4.74	-1.05578	cacauuacacggucgaccucu	hsa-miR-323-3p	Down
hsa-miR-29c*	0.41871	0.0985099	-1.66998	-4.743	-1.18021	ugaccgauuucuccugguguuc	hsa-miR-29c*	Down
hsa-miR-1323	0.41871	0.0994151	-1.66543	-4.751	-1.00708	ucaaaacugaggggcauuuucu	hsa-miR-1323	Down
hsa-miR-431*	0.41871	0.0995497	-1.66476	-4.752	-1.04472	caggucgucuugcagggcuucu	hsa-miR-431*	Down
hsa-miR-369-3p	0.41871	0.0997816	-1.6636	-4.753	-1.11687	aauaauacaugguugaucuuu	hsa-miR-369-3p	Down
hsa-miR-1469	0.41871	0.100619	1.65944	-4.76	0.472869	cucggcgcggggcgcgggcucc	hsa-miR-1469	Up
hsa-let-7i*	0.41871	0.100683	1.65913	-4.76	0.61093	cugcgcaagcuacugccuugcu	hsa-let-7i*	Up
hsa-miR-376a	0.41871	0.100918	1.65797	-4.762	0.429843	aucauagaggaaaauccacgu	hsa-miR-376a	Up
hsa-miR-524-3p	0.4228	0.102571	1.64985	-4.774	1.04764	gaaggcgcuucccuuuggagu	hsa-miR-524-3p	Up
hsa-miR-1908	0.4228	0.102882	1.64834	-4.777	0.681719	cggcggggacggcgauugguc	hsa-miR-1908	Up
hsa-miR-556-3p	0.42291	0.103399	-1.64583	-4.781	-1.125	auauuaccauuagcucaucuuu	hsa-miR-556-3p	Down
hsa-miR-621	0.42692	0.106084	1.63295	-4.8	0.691337	ggcuagcaacagcgcuuaccu	hsa-miR-621	Up
hsa-miR-527	0.42692	0.106153	1.63263	-4.801	0.73932	cugcaaagggaagcccuuuc	hsa-miR-527	Up
hsa-miR-106a*	0.42692	0.10619	1.63245	-4.801	0.591952	cugcaauguaagcacuucuuac	hsa-miR-106a*	Up
hsa-miR-30c-1*	0.42692	0.106508	1.63095	-4.803	1.08142	cugggagaggguuguuuacucc	hsa-miR-30c-1*	Up
hsa-miR-367*	0.42692	0.106853	-1.62932	-4.806	-0.938854	acuguugcuaauaugcaacucu	hsa-miR-367*	Down
hsa-miR-590-5p	0.42972	0.108312	1.62247	-4.816	0.402501	gagcuuauucauaaaagugcag	hsa-miR-590-5p	Up
hsa-miR-1909	0.42972	0.108693	1.6207	-4.819	0.524915	cgcaggggccgggugcucaccg	hsa-miR-1909	Up
hsa-miR-1282	0.42972	0.109049	-1.61905	-4.821	-0.974379	ucguuugccuuuuucugcuu	hsa-miR-1282	Down
hsa-miR-9*	0.43191	0.110105	-1.61416	-4.828	-0.737575	auaaagcuagauaaccgaaagu	hsa-miR-9*	Down
hsa-miR-30b*	0.43268	0.110801	1.61096	-4.833	1.30819	cugggagguggauguuuacuuc	hsa-miR-30b*	Up
hsa-miR-124	0.43442	0.111752	1.60663	-4.84	0.70196	uaaggcacgcggugaaugcc	hsa-miR-124	Up
hsa-miR-1178	0.43734	0.11301	-1.60093	-4.848	-1.23304	uugcucacuguucuucccuag	hsa-miR-1178	Down
hsa-miR-503	0.44496	0.115493	1.58983	-4.865	0.613387	uagcagcgggaacaguucugcag	hsa-miR-503	Up
hsa-let-7b	0.44742	0.11665	-1.58472	-4.872	-0.91237	ugagguaguagguugugugguu	hsa-let-7b	Down
hsa-miR-583	0.44906	0.118091	-1.57841	-4.881	-0.670457	caaagaggaaggucccauuac	hsa-miR-583	Down
hsa-miR-219-2-3p	0.44906	0.118119	-1.57829	-4.882	-1.0489	agaauuguggcuggacaucugu	hsa-miR-219-2-3p	Down
hsa-let-7c	0.4521	0.119442	-1.57256	-4.89	-0.968927	ugagguaguagguuguaugguu	hsa-let-7c	Down
hsa-miR-149*	0.45301	0.120306	1.56884	-4.895	0.655643	agggagggacgggggcugugc	hsa-miR-149*	Up
hsa-miR-424	0.45301	0.120733	1.56702	-4.898	0.596897	cagcagcaauucauguuuugaa	hsa-miR-424	Up
hsa-miR-488	0.45584	0.122448	-1.55972	-4.909	-1.03446	uugaaaggcuauuucuugguc	hsa-miR-488	Down
hsa-miR-1286	0.45584	0.122545	1.55931	-4.909	0.652149	ugcaggaccaagaugagcccu	hsa-miR-1286	Up
hsa-miR-18b*	0.45624	0.12318	1.55663	-4.913	0.470237	ugcccuaaaugccccuucuggc	hsa-miR-18b*	Up
hsa-miR-495	0.45774	0.124564	-1.55083	-4.922	-0.570751	aaacaaacauggugcacuucuu	hsa-miR-495	Down
hsa-miR-451	0.45774	0.125168	-1.54832	-4.925	-0.610057	aaaccguuaccauuacugaguu	hsa-miR-451	Down
hsa-miR-588	0.45774	0.12615	1.54425	-4.931	0.47639	uuggccacaauggguuagaac	hsa-miR-588	Up
hsa-miR-372	0.45774	0.126289	-1.54367	-4.932	-0.934619	aaagugcugcgacauuugagcgu	hsa-miR-372	Down
hsa-miR-339-5p	0.45774	0.126368	-1.54335	-4.932	-0.51779	ucccuguccuccaggagcucacg	hsa-miR-339-5p	Down
hsa-miR-875-5p	0.45774	0.127556	-1.53846	-4.939	-0.999549	uauaccucaguuuuaucaggug	hsa-miR-875-5p	Down
hsa-miR-519e*	0.45774	0.127976	1.53675	-4.942	0.606762	uucuccaaaagggagcacuuuc	hsa-miR-519e*	Up
hsa-miR-636	0.45774	0.128494	-1.53464	-4.945	-0.425467	ugugcuugcucgucccgcccgca	hsa-miR-636	Down
hsa-miR-623	0.45774	0.129185	1.53183	-4.949	0.608344	aucccuugcaggggcuguugggu	hsa-miR-623	Up
hsa-miR-500*	0.45774	0.129396	1.53097	-4.95	0.413969	augcaccugggcaaggauucug	hsa-miR-500*	Up
hsa-miR-197	0.45774	0.130473	-1.52663	-4.956	-0.506065	uucaccaccuucuccacccagc	hsa-miR-197	Down
hsa-miR-520e	0.45774	0.130524	-1.52642	-4.956	-1.07081	aaagugcuuccuuuuugaggg	hsa-miR-520e	Down
hsa-miR-26a	0.45774	0.131817	1.52124	-4.964	0.363001	uucaaguaauccaggauaggcu	hsa-miR-26a	Up
hsa-miR-194*	0.45774	0.131922	1.52082	-4.964	0.809202	ccaguggggcugcuguuaucug	hsa-miR-194*	Up
hsa-miR-425*	0.45774	0.131931	1.52079	-4.964	0.743007	aucgggaaugucguguccgccc	hsa-miR-425*	Up
hsa-miR-30a	0.45774	0.132294	-1.51934	-4.967	-0.576664	uguaaacauccucgacuggaag	hsa-miR-30a	Down
hsa-miR-17*	0.45774	0.132607	1.5181	-4.968	0.536665	acugcagugaaggcacuuguag	hsa-miR-17*	Up
hsa-miR-299-3p	0.45774	0.133133	-1.51601	-4.971	-1.13194	uaugugggaugguaaaccgcuu	hsa-miR-299-3p	Down
hsa-miR-338-3p	0.46047	0.134458	1.51079	-4.979	0.580415	uccagcaucagugauuuuguug	hsa-miR-338-3p	Up
hsa-miR-135b*	0.46124	0.13522	1.5078	-4.983	0.589074	auguagggcuaaaagccauggg	hsa-miR-135b*	Up
hsa-miR-1285	0.46246	0.136142	1.50421	-4.988	0.493539	ucugggcaacaaagugagaccu	hsa-miR-1285	Up
hsa-miR-1303	0.46246	0.136649	1.50224	-4.991	0.878844	uuuagagacggggucuugcucu	hsa-miR-1303	Up
hsa-miR-1	0.46519	0.13824	-1.49609	-4.999	-1.04621	uggaauguaaagaaguauguau	hsa-miR-1	Down
hsa-miR-33b*	0.46519	0.138533	1.49497	-5.001	0.364068	cagugccucggcagugcagccc	hsa-miR-33b*	Up
hsa-let-7a*	0.46574	0.139906	-1.48972	-5.008	-1.04655	cuauacaaucuacugucuuuc	hsa-let-7a*	Down
hsa-miR-127-5p	0.46574	0.14042	1.48777	-5.011	0.802517	cugaagcucagagggcucugau	hsa-miR-127-5p	Up
hsa-miR-30c	0.46574	0.140884	1.48601	-5.013	0.418363	uguaaacauccuacacucucagc	hsa-miR-30c	Up
hsa-miR-501-3p	0.46574	0.141376	1.48415	-5.016	0.353003	aaugcacccgggcaaggauucu	hsa-miR-501-3p	Up
hsa-miR-1251	0.46574	0.141395	1.48407	-5.016	0.328892	acucuagcugccaaaggcgcu	hsa-miR-1251	Up
hsa-miR-127-3p	0.46614	0.142057	1.48158	-5.019	0.738703	ucggauccgucugagcuuggcu	hsa-miR-127-3p	Up
hsa-miR-195	0.46884	0.14429	1.47323	-5.031	0.425413	uagcagcacagaaauauuggc	hsa-miR-195	Up
hsa-miR-491-3p	0.46884	0.145168	1.46997	-5.035	0.796365	cuuaugcaagauucccuucuac	hsa-miR-491-3p	Up
hsa-miR-520g	0.46884	0.145202	-1.46985	-5.035	-0.844118	acaaagugcuucccuuuagagugu	hsa-miR-520g	Down
hsa-miR-625*	0.46884	0.145486	-1.4688	-5.037	-0.459976	gacuauagaacuuucccccuca	hsa-miR-625*	Down
hsa-miR-920	0.46884	0.146346	1.46563	-5.041	0.903223	ggggagcuguggaagcagua	hsa-miR-920	Up
hsa-miR-1258	0.46884	0.146639	-1.46455	-5.043	-1.00737	aguuaggauuaggucguggaa	hsa-miR-1258	Down
hsa-miR-380	0.46884	0.146738	-1.46419	-5.043	-1.01412	uauguaauaugguccacaucuu	hsa-miR-380	Down
hsa-miR-423-3p	0.46884	0.147429	1.46166	-5.047	0.345728	agcucggucugaggccccucagu	hsa-miR-423-3p	Up
hsa-miR-1244	0.46884	0.148283	1.45855	-5.051	1.00263	aaguaguugguuuguaugagaugguu	hsa-miR-1244	Up
hsa-miR-148a	0.46884	0.149375	1.45458	-5.056	0.449506	ucagugcacuacagaacuuugu	hsa-miR-148a	Up
hsa-let-7c*	0.46884	0.149499	-1.45413	-5.057	-1.00226	uagaguuacacccugggaguua	hsa-let-7c*	Down
hsa-miR-612	0.46884	0.149656	1.45357	-5.058	0.52285	gcugggcagggcuucugagcuccuu	hsa-miR-612	Up
hsa-miR-29a	0.46884	0.149941	1.45254	-5.059	0.407515	uagcaccaucugaaaucgguua	hsa-miR-29a	Up
hsa-miR-1266	0.47102	0.151185	1.44806	-5.065	0.410559	ccucagggcuguagaacagggcu	hsa-miR-1266	Up
hsa-miR-519d	0.47754	0.154126	-1.4376	-5.079	-0.672193	caaagugccucccuuuagagug	hsa-miR-519d	Down
hsa-miR-21	0.47754	0.154678	1.43566	-5.082	0.700394	uagcuuaucagacugauguuga	hsa-miR-21	Up
hsa-miR-20a*	0.47754	0.154939	1.43474	-5.083	0.475121	acugcauuaugagcacuuaaag	hsa-miR-20a*	Up
hsa-miR-302d	0.47932	0.156069	-1.43077	-5.088	-0.792579	uaagugcuuccauguuugagugu	hsa-miR-302d	Down
hsa-miR-1253	0.47989	0.156814	1.42817	-5.092	0.682609	agagaagaagaucagccugca	hsa-miR-1253	Up
hsa-miR-1228	0.48018	0.157465	-1.42591	-5.095	-0.681106	ucacaccugccucgcccccc	hsa-miR-1228	Down
hsa-miR-146a	0.48803	0.161465	-1.41215	-5.113	-0.423032	ugagaacugaauuccauggguu	hsa-miR-146a	Down
hsa-miR-130b*	0.48803	0.161997	-1.41034	-5.115	-0.939568	acucuuucccuguugcacuac	hsa-miR-130b*	Down
hsa-miR-518e	0.48803	0.162629	1.40819	-5.118	0.583594	aaagcgcuucccuucagagug	hsa-miR-518e	Up
hsa-miR-1237	0.48803	0.162675	-1.40804	-5.118	-0.560953	uccuucugcuccgucccccag	hsa-miR-1237	Down
hsa-miR-1226*	0.48803	0.162865	1.4074	-5.119	0.574971	gugagggcaugcaggccuggaugggg	hsa-miR-1226*	Up
hsa-miR-221*	0.49116	0.16448	1.40195	-5.126	0.428667	accuggcauacaauguagauuu	hsa-miR-221*	Up
hsa-miR-1290	0.49651	0.167031	-1.39343	-5.138	-0.791802	uggauuuuuggaucaggga	hsa-miR-1290	Down
hsa-let-7g*	0.49651	0.167422	1.39213	-5.139	0.496133	cuguacaggccacugccuugc	hsa-let-7g*	Up
hsa-miR-549	0.49663	0.168328	-1.38914	-5.143	-0.712957	ugacaacuauggaugagcucu	hsa-miR-549	Down
hsa-miR-302e	0.49663	0.168862	-1.38738	-5.145	-1.03838	uaagugcuuccaugcuu	hsa-miR-302e	Down
hsa-miR-136	0.49663	0.169512	-1.38524	-5.148	-0.848612	acuccauuuguuuugaugaugga	hsa-miR-136	Down
hsa-miR-541*	0.49663	0.170308	-1.38263	-5.152	-0.959319	aaaggauucugcugucggucccacu	hsa-miR-541*	Down
hsa-miR-1307	0.49663	0.170392	1.38236	-5.152	0.61598	acucggcguggcgucggucgug	hsa-miR-1307	Up
hsa-miR-381	0.49663	0.171095	1.38006	-5.155	0.406021	uauacaagggcaagcucucugu	hsa-miR-381	Up
hsa-miR-654-5p	0.49663	0.171606	1.3784	-5.157	0.474131	uggugggccgcagaacaugugc	hsa-miR-654-5p	Up
hsa-miR-548d-5p	0.49663	0.172239	-1.37634	-5.16	-0.899436	aaaaguaauugugguuuuugcc	hsa-miR-548d-5p	Down
hsa-miR-489	0.49663	0.172642	1.37504	-5.161	0.492482	gugacaucacauauacggcagc	hsa-miR-489	Up
hsa-miR-595	0.49835	0.173817	1.37124	-5.166	0.99797	gaagugugccguggugugucu	hsa-miR-595	Up
hsa-miR-544	0.49874	0.174529	-1.36896	-5.169	-0.832845	auucugcauuuuuagcaaguuc	hsa-miR-544	Down
hsa-miR-555	0.50274	0.176511	-1.36262	-5.177	-0.845109	aggguaagcugaaccucugau	hsa-miR-555	Down
hsa-miR-329	0.5043	0.177646	-1.35902	-5.182	-0.578433	aacacaccugguuaaccucuuu	hsa-miR-329	Down
hsa-miR-671-5p	0.50563	0.178699	1.35569	-5.186	0.547486	aggaagcccuggaggggcuggag	hsa-miR-671-5p	Up
hsa-miR-345	0.51534	0.182727	1.34309	-5.202	0.592302	gcugacuccuaguccagggcuc	hsa-miR-345	Up
hsa-miR-545	0.51893	0.184601	1.3373	-5.209	0.526539	ucagcaaacauuuauugugugc	hsa-miR-545	Up
hsa-miR-518a-3p	0.5194	0.185372	-1.33493	-5.212	-0.612254	gaaagcgcuucccuuugcugga	hsa-miR-518a-3p	Down
hsa-miR-888*	0.51992	0.187159	1.32947	-5.219	0.703966	gacugacaccucuuugggugaa	hsa-miR-888*	Up
hsa-miR-21*	0.51992	0.187345	1.32891	-5.22	0.485218	caacaccagucgaugggcugu	hsa-miR-21*	Up
hsa-miR-1247	0.51992	0.187365	1.32885	-5.22	0.623636	acccgucccguucguccccgga	hsa-miR-1247	Up
hsa-miR-450b-5p	0.51994	0.188296	-1.32602	-5.223	-0.405095	uuuugcaauauguuccugaaua	hsa-miR-450b-5p	Down
hsa-miR-513a-5p	0.51994	0.189233	1.32318	-5.227	0.808938	uucacagggaggugucau	hsa-miR-513a-5p	Up
hsa-miR-301a	0.51994	0.189641	1.32195	-5.228	0.447301	cagugcaauaguauugucaaagc	hsa-miR-301a	Up
hsa-miR-330-5p	0.51994	0.189888	-1.32121	-5.229	-0.866826	ucucugggccugugucuuaggc	hsa-miR-330-5p	Down
hsa-miR-25*	0.51994	0.190383	1.31972	-5.231	0.584083	aggcggagacuugggcaauug	hsa-miR-25*	Up
hsa-miR-502-5p	0.52026	0.191102	-1.31756	-5.234	-0.897292	auccuugcuaucugggugcua	hsa-miR-502-5p	Down
hsa-miR-27b	0.53017	0.195356	1.30491	-5.249	0.621518	uucacaguggcuaaguucugc	hsa-miR-27b	Up
hsa-miR-7	0.53102	0.196285	-1.30218	-5.253	-1.02323	uggaagacuagugauuuuguugu	hsa-miR-7	Down
hsa-miR-1257	0.53517	0.199345	-1.29324	-5.264	-0.985803	agugaaugauggguucugacc	hsa-miR-1257	Down
hsa-miR-646	0.53517	0.20024	1.29064	-5.267	0.483936	aagcagcugccucugaggc	hsa-miR-646	Up
hsa-miR-302a	0.53517	0.200439	-1.29006	-5.267	-0.866365	uaagugcuuccauguuuugguga	hsa-miR-302a	Down
hsa-miR-331-5p	0.53517	0.2006	-1.2896	-5.268	-0.982502	cuagguauggucccagggaucc	hsa-miR-331-5p	Down
hsa-miR-568	0.53517	0.201675	1.2865	-5.272	0.544171	auguauaaauguauacacac	hsa-miR-568	Up
hsa-miR-511	0.53517	0.201836	-1.28603	-5.272	-0.893841	gugucuuuugcucugcaguca	hsa-miR-511	Down
hsa-miR-380*	0.53517	0.202635	-1.28374	-5.275	-0.606154	ugguugaccauagaacaugcgc	hsa-miR-380*	Down
hsa-miR-135a	0.53517	0.203008	-1.28267	-5.276	-0.761894	uauggcuuuuuauuccuauguga	hsa-miR-135a	Down
hsa-miR-371-3p	0.53517	0.204387	-1.27872	-5.281	-0.842165	aagugccgccaucuuuugagugu	hsa-miR-371-3p	Down
hsa-miR-490-5p	0.53517	0.204529	1.27832	-5.282	0.389735	ccauggaucuccaggugggu	hsa-miR-490-5p	Up
hsa-miR-1224-5p	0.53517	0.204641	1.278	-5.282	0.83674	gugaggacucgggaggugg	hsa-miR-1224-5p	Up
hsa-miR-1200	0.53568	0.205456	1.27568	-5.285	0.415395	cuccugagccauucugagccuc	hsa-miR-1200	Up
hsa-miR-520b	0.54102	0.208134	-1.26811	-5.294	-0.881015	aaagugcuuccuuuuagaggg	hsa-miR-520b	Down
hsa-miR-892a	0.5429	0.209487	1.26431	-5.298	0.814385	cacuguguccuuucugcguag	hsa-miR-892a	Up
hsa-miR-183*	0.54479	0.211085	1.25985	-5.304	0.519658	gugaauuaccgaagggccauaa	hsa-miR-183*	Up
hsa-miR-194	0.54479	0.211478	1.25876	-5.305	0.343473	uguaacagcaacuccaugugga	hsa-miR-194	Up
hsa-miR-148b	0.54545	0.212367	1.25629	-5.308	0.399082	ucagugcaucacagaacuuugu	hsa-miR-148b	Up
hsa-miR-1302	0.54585	0.213152	-1.25412	-5.31	-0.900047	uugggacauacuuaugcuaaa	hsa-miR-1302	Down
hsa-miR-508-3p	0.54739	0.214595	-1.25013	-5.315	-0.852876	ugauuguagccuuuuggaguaga	hsa-miR-508-3p	Down
hsa-miR-890	0.54739	0.215455	1.24777	-5.318	0.788219	uacuuggaaaggcaucaguug	hsa-miR-890	Up
hsa-miR-507	0.54739	0.215758	-1.24694	-5.319	-0.893193	uuuugcaccuuuuggagugaa	hsa-miR-507	Down
hsa-miR-1539	0.54739	0.216292	1.24548	-5.321	0.530115	uccugcgcgucccagaugccc	hsa-miR-1539	Up
hsa-miR-1269	0.55155	0.219095	1.23785	-5.329	0.664456	cuggacugagccgugcuacugg	hsa-miR-1269	Up
hsa-miR-1537	0.55155	0.219631	-1.2364	-5.331	-0.769027	aaaaccgucuaguuacaguugu	hsa-miR-1537	Down
hsa-miR-876-5p	0.55155	0.219851	-1.2358	-5.332	-0.821832	uggauuucuuugugaaucacca	hsa-miR-876-5p	Down
hsa-miR-29a*	0.55362	0.221318	-1.23185	-5.336	-0.90338	acugauuucuuuugguguucag	hsa-miR-29a*	Down
hsa-miR-888	0.55388	0.222064	-1.22984	-5.339	-0.913805	uacucaaaaagcugucaguca	hsa-miR-888	Down
hsa-miR-663	0.55902	0.226147	1.21896	-5.351	0.356849	aggcggggcgccgcgggaccgc	hsa-miR-663	Up
hsa-miR-944	0.55902	0.226304	-1.21854	-5.352	-0.881831	aaauuauuguacaucggaugag	hsa-miR-944	Down
hsa-miR-541	0.55902	0.22686	1.21707	-5.353	0.482082	uggugggcacagaaucuggacu	hsa-miR-541	Up
hsa-miR-885-5p	0.55902	0.226884	1.21701	-5.353	0.839106	uccauuacacuacccugccucu	hsa-miR-885-5p	Up
hsa-miR-376a*	0.55902	0.227367	-1.21574	-5.355	-0.928748	guagauucuccuucuaugagua	hsa-miR-376a*	Down
hsa-miR-1911*	0.56003	0.229855	1.2092	-5.362	0.391538	caccaggcauuguggucucc	hsa-miR-1911*	Up
hsa-miR-150*	0.56003	0.229887	1.20911	-5.362	0.576504	cugguacaggccugggggacag	hsa-miR-150*	Up
hsa-miR-33a	0.56003	0.229995	1.20883	-5.363	0.53098	gugcauuguaguugcauugca	hsa-miR-33a	Up
hsa-miR-519b-5p	0.56003	0.230371	1.20785	-5.364	0.383203	cucuagagggaagcgcuuucug	hsa-miR-519b-5p	Up
hsa-miR-214	0.56418	0.233063	1.20085	-5.372	0.422506	acagcaggcacagacaggcagu	hsa-miR-214	Up
hsa-miR-296-5p	0.56418	0.233386	-1.20001	-5.373	-0.450341	agggcccccccucaauccugu	hsa-miR-296-5p	Down
hsa-miR-1914	0.56544	0.234563	1.19697	-5.376	0.758424	cccugugcccggcccacuucug	hsa-miR-1914	Up
hsa-miR-551b*	0.57866	0.240719	1.18124	-5.394	0.748763	gaaaucaagcgugggugagacc	hsa-miR-551b*	Up
hsa-miR-1915*	0.58022	0.242407	-1.17698	-5.399	-0.804841	accuugccuugcugcccgggcc	hsa-miR-1915*	Down
hsa-miR-378*	0.58022	0.242924	1.17568	-5.4	0.572092	cuccugacuccagguccugugu	hsa-miR-378*	Up
hsa-miR-370	0.58022	0.243969	1.17305	-5.403	0.608036	gccugcugggguggaaccuggu	hsa-miR-370	Up
hsa-miR-96	0.58022	0.244276	1.17229	-5.404	0.322985	uuuggcacuagcacauuuuugcu	hsa-miR-96	Up
hsa-miR-373	0.58022	0.244786	1.17101	-5.405	0.825495	gaagugcuucgauuuuggggugu	hsa-miR-373	Up
hsa-miR-99a*	0.58022	0.245946	1.16811	-5.408	0.730983	caagcucgcuucuaugggucug	hsa-miR-99a*	Up
hsa-miR-182*	0.58022	0.246071	-1.1678	-5.409	-0.486767	ugguucuagacuugccaacua	hsa-miR-182*	Down
hsa-miR-147b	0.58416	0.24842	-1.16196	-5.415	-0.732367	gugugcggaaaugcuucugcua	hsa-miR-147b	Down
hsa-miR-328	0.5856	0.249713	-1.15877	-5.419	-0.834296	cuggcccucucugcccuuccgu	hsa-miR-328	Down
hsa-miR-661	0.58951	0.252062	-1.153	-5.425	-0.804602	ugccugggucucuggccugcgcgu	hsa-miR-661	Down
hsa-miR-326	0.59561	0.255358	1.14496	-5.434	0.394574	ccucugggcccuuccuccag	hsa-miR-326	Up
hsa-miR-220a	0.5961	0.2569	1.14123	-5.438	0.538769	ccacaccguaucugacacuuu	hsa-miR-220a	Up
hsa-miR-193b*	0.5961	0.256953	-1.1411	-5.438	-0.894833	cgggguuuugagggcgagauga	hsa-miR-193b*	Down
hsa-miR-1207-5p	0.59697	0.258313	1.13782	-5.441	0.479256	uggcagggaggcugggagggg	hsa-miR-1207-5p	Up
hsa-miR-452	0.59697	0.259047	-1.13605	-5.443	-0.473057	aacuguuugcagaggaaacuga	hsa-miR-452	Down
hsa-miR-557	0.59697	0.259402	1.1352	-5.444	0.717828	guuugcacgggugggccuugucu	hsa-miR-557	Up
hsa-miR-1270	0.59726	0.260914	-1.13158	-5.448	-0.814892	cuggagauauggaagagcugugu	hsa-miR-1270	Down
hsa-miR-563	0.59726	0.261343	-1.13055	-5.449	-0.77535	agguugacauacguuuccc	hsa-miR-563	Down
hsa-miR-665	0.59726	0.261603	1.12993	-5.45	0.46666	accaggaggcugaggccccu	hsa-miR-665	Up
hsa-miR-146b-5p	0.6041	0.265301	-1.12115	-5.459	-0.478371	ugagaacugaauuccauaggcu	hsa-miR-146b-5p	Down
hsa-miR-611	0.61173	0.269359	1.11162	-5.469	0.446534	gcgaggaccccucggggucugac	hsa-miR-611	Up
hsa-miR-215	0.61259	0.270449	1.10907	-5.472	0.299803	augaccuaugaauugacagac	hsa-miR-215	Up
hsa-miR-331-3p	0.61683	0.273074	-1.10297	-5.478	-0.379173	gccccugggccuauccuagaa	hsa-miR-331-3p	Down
hsa-miR-409-5p	0.61683	0.274361	-1.1	-5.481	-0.409913	agguuacccgagcaacuuugcau	hsa-miR-409-5p	Down
hsa-miR-617	0.61683	0.274464	-1.09976	-5.481	-0.775953	agacuucccauuugaagguggc	hsa-miR-617	Down
hsa-miR-411	0.61908	0.276184	-1.0958	-5.485	-0.566161	uaguagaccguauagcguacg	hsa-miR-411	Down
hsa-miR-1180	0.63062	0.282247	-1.08197	-5.5	-0.684146	uuuccggcucgcgugggugugu	hsa-miR-1180	Down
hsa-miR-556-5p	0.63062	0.282795	-1.08074	-5.501	-0.374265	gaugagcucauuguaauaugag	hsa-miR-556-5p	Down
hsa-miR-455-3p	0.63108	0.283799	1.07847	-5.503	0.340026	gcaguccaugggcauauacac	hsa-miR-455-3p	Up
hsa-miR-766	0.63108	0.284482	-1.07693	-5.505	-0.31381	acuccagccccacagccucagc	hsa-miR-766	Down
hsa-miR-943	0.63108	0.285742	-1.0741	-5.508	-0.640908	cugacuguugccguccuccag	hsa-miR-943	Down
hsa-miR-302a*	0.63108	0.286347	-1.07274	-5.509	-0.581967	acuuaaacguggauguacuugcu	hsa-miR-302a*	Down
hsa-miR-654-3p	0.63108	0.286657	-1.07205	-5.51	-0.736101	uaugucugcugaccaucaccuu	hsa-miR-654-3p	Down
hsa-miR-210	0.63278	0.288423	-1.0681	-5.514	-0.400696	cugugcgugugacagcggcuga	hsa-miR-210	Down
hsa-miR-92b*	0.63278	0.2896	1.06548	-5.516	0.337629	agggacgggacgcggugcagug	hsa-miR-92b*	Up
hsa-miR-566	0.63278	0.289628	1.06542	-5.516	0.386481	gggcgccugugaucccaac	hsa-miR-566	Up
hsa-miR-1470	0.63529	0.29151	-1.06124	-5.521	-0.281648	gcccuccgcccgugcaccccg	hsa-miR-1470	Down
hsa-miR-379*	0.63671	0.2929	1.05817	-5.524	0.526975	uauguaacaugguccacuaacu	hsa-miR-379*	Up
hsa-miR-138	0.63877	0.295087	1.05336	-5.529	0.69434	agcugguguugugaaucaggccg	hsa-miR-138	Up
hsa-miR-1296	0.63877	0.295855	1.05167	-5.53	0.535743	uuagggcccuggcuccaucucc	hsa-miR-1296	Up
hsa-miR-192	0.63877	0.296071	1.0512	-5.531	0.298328	cugaccuaugaauugacagcc	hsa-miR-192	Up
hsa-miR-602	0.64166	0.298152	1.04665	-5.535	0.306403	gacacgggcgacagcugcggccc	hsa-miR-602	Up
hsa-miR-1231	0.64334	0.301314	1.03979	-5.542	0.420083	gugucugggcggacagcugc	hsa-miR-1231	Up
hsa-miR-1179	0.64334	0.303656	1.03473	-5.547	0.661229	aagcauucuuucauugguugg	hsa-miR-1179	Up
hsa-miR-135a*	0.64334	0.304326	-1.03329	-5.548	-0.736515	uauagggauuggagccguggcg	hsa-miR-135a*	Down
hsa-miR-767-3p	0.64334	0.304805	-1.03226	-5.549	-0.580953	ucugcucauaccccaugguuucu	hsa-miR-767-3p	Down
hsa-miR-144	0.64334	0.304889	1.03208	-5.549	0.568856	uacaguauagaugauguacu	hsa-miR-144	Up
hsa-miR-214*	0.64334	0.305678	-1.03039	-5.551	-0.314972	ugccugucuacacuugcugugc	hsa-miR-214*	Down
hsa-miR-103-as	0.64334	0.306345	1.02896	-5.553	0.379092	ucauagcccuguacaaugcugcu	hsa-miR-103-as	Up
hsa-miR-1292	0.64334	0.307003	1.02755	-5.554	0.395186	ugggaacggguuccggcagacgcug	hsa-miR-1292	Up
hsa-miR-1291	0.64334	0.307966	1.0255	-5.556	0.322122	uggcccugacugaagaccagcagu	hsa-miR-1291	Up
hsa-miR-184	0.64334	0.308623	1.0241	-5.557	0.734222	uggacggagaacugauaagggu	hsa-miR-184	Up
hsa-miR-548o	0.64334	0.308797	1.02372	-5.558	0.466158	ccaaaacugcaguuacuuuugc	hsa-miR-548o	Up
hsa-miR-30e	0.64334	0.309183	-1.0229	-5.558	-0.377226	uguaaacauccuugacuggaag	hsa-miR-30e	Down
hsa-miR-1272	0.64334	0.309292	1.02267	-5.559	0.318826	gaugaugauggcagcaaauucugaaa	hsa-miR-1272	Up
hsa-miR-1238	0.64334	0.309371	-1.0225	-5.559	-0.806433	cuuccucgucugucugcccc	hsa-miR-1238	Down
hsa-miR-154	0.64458	0.310797	-1.01948	-5.562	-0.672424	uagguuauccguguugccuucg	hsa-miR-154	Down
hsa-miR-31	0.64458	0.31146	1.01807	-5.563	0.332151	aggcaagaugcuggcauagcu	hsa-miR-31	Up
hsa-miR-129-3p	0.64509	0.312453	-1.01597	-5.565	-0.279918	aagcccuuaccccaaaaagcau	hsa-miR-129-3p	Down
hsa-miR-548a-5p	0.6461	0.313694	-1.01336	-5.568	-0.78173	aaaaguaauugcgaguuuuacc	hsa-miR-548a-5p	Down
hsa-miR-302f	0.64655	0.315205	-1.01018	-5.571	-0.689302	uaauugcuuccauguuu	hsa-miR-302f	Down
hsa-miR-200a*	0.64655	0.315602	-1.00934	-5.571	-0.564774	caucuuaccggacagugcugga	hsa-miR-200a*	Down
hsa-miR-453	0.64655	0.316157	1.00818	-5.573	0.800936	agguuguccguggugaguucgca	hsa-miR-453	Up
hsa-miR-188-3p	0.64806	0.317645	1.00507	-5.575	0.260679	cucccacaugcaggguuugca	hsa-miR-188-3p	Up
hsa-miR-302b*	0.64809	0.319007	-1.00223	-5.578	-0.706165	acuuuaacauggaagugcuuuc	hsa-miR-302b*	Down
hsa-miR-519c-3p	0.64809	0.319163	-1.0019	-5.579	-0.604292	aaagugcaucuuuuuagaggau	hsa-miR-519c-3p	Down
hsa-miR-873	0.64817	0.321132	0.99781	-5.582	0.479093	gcaggaacuugugagucuccu	hsa-miR-873	Up
hsa-miR-185*	0.64817	0.32179	0.996446	-5.584	0.783927	aggggcuggcuuuccucugguc	hsa-miR-185*	Up
hsa-miR-24	0.64817	0.321931	0.996156	-5.584	0.4258	uggcucaguucagcaggaacag	hsa-miR-24	Up
hsa-miR-432	0.64817	0.322221	0.995556	-5.584	0.730025	ucuuggaguaggucauugggugg	hsa-miR-432	Up
hsa-miR-193a-3p	0.64817	0.323596	0.992714	-5.587	0.354027	aacuggccuacaaagucccagu	hsa-miR-193a-3p	Up
hsa-miR-1306	0.64817	0.32371	0.992478	-5.587	0.802236	acguuggcucugguggug	hsa-miR-1306	Up
hsa-miR-146a*	0.65069	0.325722	0.988337	-5.591	0.39209	ccucugaaauucaguucuucag	hsa-miR-146a*	Up
hsa-miR-548m	0.65464	0.329921	-0.979748	-5.599	-0.70859	caaagguauuugugguuuuug	hsa-miR-548m	Down
hsa-miR-361-5p	0.65464	0.330066	-0.979452	-5.6	-0.34932	uuaucagaaucuccagggguac	hsa-miR-361-5p	Down
hsa-miR-196b	0.65464	0.331046	-0.977459	-5.601	-0.657092	uagguaguuuccuguuguuggg	hsa-miR-196b	Down
hsa-miR-186	0.65464	0.332884	0.973731	-5.605	0.707026	caaagaauucuccuuuugggcu	hsa-miR-186	Up
hsa-miR-1246	0.65464	0.332897	-0.973705	-5.605	-0.705976	aauggauuuuuggagcagg	hsa-miR-1246	Down
hsa-miR-181b	0.65464	0.333272	0.972944	-5.606	0.488484	aacauucauugcugucggugggu	hsa-miR-181b	Up
hsa-miR-629	0.65464	0.333882	-0.971711	-5.607	-0.866513	uggguuuacguugggagaacu	hsa-miR-629	Down
hsa-miR-200b*	0.65464	0.334108	0.971255	-5.607	0.487174	caucuuacugggcagcauugga	hsa-miR-200b*	Up
hsa-miR-499-3p	0.65464	0.334526	0.970409	-5.608	0.549227	aacaucacagcaagucugugcu	hsa-miR-499-3p	Up
hsa-miR-18b	0.65469	0.335312	-0.968825	-5.609	-0.460564	uaaggugcaucuagugcaguuag	hsa-miR-18b	Down
hsa-miR-222*	0.65948	0.338964	0.961491	-5.616	0.308793	cucaguagccaguguagauccu	hsa-miR-222*	Up
hsa-miR-513a-3p	0.65948	0.340682	-0.95806	-5.619	-0.685142	uaaauuucaccuuucugagaagg	hsa-miR-513a-3p	Down
hsa-miR-1284	0.65948	0.34145	0.956528	-5.621	0.700024	ucuauacagacccuggcuuuuc	hsa-miR-1284	Up
hsa-miR-15a*	0.65948	0.34301	0.953426	-5.623	0.394498	caggccauauugugcugccuca	hsa-miR-15a*	Up
hsa-miR-1914*	0.65948	0.343799	-0.951861	-5.625	-0.235717	ggaggggucccgcacugggagg	hsa-miR-1914*	Down
hsa-miR-330-3p	0.65948	0.344143	0.951178	-5.625	0.283868	gcaaagcacacggccugcagaga	hsa-miR-330-3p	Up
hsa-miR-130a*	0.65948	0.344491	-0.950489	-5.626	-0.529767	uucacauugugcuacugucugc	hsa-miR-130a*	Down
hsa-miR-129-5p	0.65948	0.344701	-0.950074	-5.626	-0.654266	cuuuuugcggucugggcuugc	hsa-miR-129-5p	Down
hsa-miR-216a	0.65948	0.345359	0.94877	-5.628	0.328944	uaaucucagcuggcaacuguga	hsa-miR-216a	Up
hsa-let-7e	0.65948	0.3456	-0.948295	-5.628	-0.753065	ugagguaggagguuguauaguu	hsa-let-7e	Down
hsa-miR-7-2*	0.65948	0.346172	-0.947166	-5.629	-0.581973	caacaaaucccagucuaccuaa	hsa-miR-7-2*	Down
hsa-miR-520f	0.66233	0.349291	-0.941027	-5.634	-0.680787	aagugcuuccuuuuagaggguu	hsa-miR-520f	Down
hsa-miR-138-2*	0.66233	0.349957	0.93972	-5.636	0.499935	gcuauuucacgacaccaggguu	hsa-miR-138-2*	Up
hsa-miR-181c	0.66233	0.3503	-0.939048	-5.636	-0.320493	aacauucaaccugucggugagu	hsa-miR-181c	Down
hsa-miR-92b	0.66233	0.350735	-0.938196	-5.637	-0.258299	uauugcacucgucccggccucc	hsa-miR-92b	Down
hsa-miR-492	0.66454	0.352677	0.934402	-5.64	0.458403	aggaccugcgggacaagauucuu	hsa-miR-492	Up
hsa-miR-517*	0.6667	0.354595	0.930668	-5.644	0.250445	ccucuagauggaagcacugucu	hsa-miR-517*	Up
hsa-miR-371-5p	0.66819	0.356163	0.927624	-5.646	0.549466	acucaaacugugggggcacu	hsa-miR-371-5p	Up
hsa-miR-1206	0.67826	0.362314	0.915768	-5.657	0.422597	uguucauguagauguuuaagc	hsa-miR-1206	Up
hsa-miR-496	0.68193	0.365065	-0.910507	-5.661	-0.331815	ugaguauuacauggccaaucuc	hsa-miR-496	Down
hsa-miR-1250	0.68653	0.368324	0.904308	-5.667	0.700639	acggugcuggauguggccuuu	hsa-miR-1250	Up
hsa-miR-340	0.687	0.370147	0.900854	-5.67	0.336354	uuauaaagcaaugagacugauu	hsa-miR-340	Up
hsa-miR-192*	0.687	0.370804	0.899612	-5.671	0.173308	cugccaauuccauaggucacag	hsa-miR-192*	Up
hsa-miR-548j	0.687	0.371333	-0.898613	-5.671	-0.635426	aaaaguaauugcggucuuuggu	hsa-miR-548j	Down
hsa-miR-106a	0.687	0.37176	0.897809	-5.672	0.456573	aaaagugcuuacagugcagguag	hsa-miR-106a	Up
hsa-miR-18a*	0.69083	0.374635	-0.892399	-5.677	-0.392016	acugcccuaagugcuccuucugg	hsa-miR-18a*	Down
hsa-miR-572	0.69269	0.377111	-0.887761	-5.681	-0.600023	guccgcucggcgguggccca	hsa-miR-572	Down
hsa-miR-548e	0.69269	0.377535	-0.88697	-5.681	-0.456405	aaaaacugagacuacuuuugca	hsa-miR-548e	Down
hsa-miR-148b*	0.69269	0.378499	-0.885171	-5.683	-0.524354	aaguucuguuauacacucaggc	hsa-miR-148b*	Down
hsa-miR-34c-3p	0.69269	0.378935	-0.884357	-5.683	-0.351953	aaucacuaaccacacggccagg	hsa-miR-34c-3p	Down
hsa-miR-19b-2*	0.69269	0.379914	-0.882534	-5.685	-0.577971	aguuuugcagguuugcauuuca	hsa-miR-19b-2*	Down
hsa-miR-422a	0.69269	0.380457	0.881526	-5.686	0.246046	acuggacuuagggucagaaggc	hsa-miR-422a	Up
hsa-miR-27a	0.69439	0.382193	0.878302	-5.689	0.309357	uucacaguggcuaaguuccgc	hsa-miR-27a	Up
hsa-miR-20a	0.69531	0.384296	0.874411	-5.692	0.504817	uaaagugcuuauagugcagguag	hsa-miR-20a	Up
hsa-miR-802	0.69531	0.385949	0.871362	-5.694	0.455587	caguaacaaagauucauccuugu	hsa-miR-802	Up
hsa-miR-199b-3p	0.69531	0.386784	-0.869825	-5.696	-0.302329	acaguagucugcacauugguua	hsa-miR-199b-3p	Down
hsa-miR-1197	0.69531	0.388316	-0.86701	-5.698	-0.46751	uaggacacauggucuacuucu	hsa-miR-1197	Down
hsa-miR-1225-5p	0.69531	0.388623	0.866447	-5.698	0.520311	guggguacggcccagugggggg	hsa-miR-1225-5p	Up
hsa-miR-187	0.69531	0.388929	0.865885	-5.699	0.61791	ucgugucuuguguugcagccgg	hsa-miR-187	Up
hsa-let-7d*	0.69531	0.389043	0.865677	-5.699	0.480226	cuauacgaccugcugccuuucu	hsa-let-7d*	Up
hsa-miR-592	0.69531	0.389216	0.86536	-5.699	0.475525	uugugucaauaugcgaugaugu	hsa-miR-592	Up
hsa-miR-485-3p	0.69531	0.390787	-0.862485	-5.702	-0.586556	gucauacacggcucuccucucu	hsa-miR-485-3p	Down
hsa-miR-1245	0.69531	0.391132	0.861853	-5.702	0.479803	aagugaucuaaaggccuacau	hsa-miR-1245	Up
hsa-miR-647	0.69531	0.391566	0.86106	-5.703	0.241574	guggcugcacucacuuccuuc	hsa-miR-647	Up
hsa-miR-31*	0.69832	0.39474	0.85528	-5.707	0.258655	ugcuaugccaacauauugccau	hsa-miR-31*	Up
hsa-miR-455-5p	0.69832	0.394877	-0.855031	-5.708	-0.579324	uaugugccuuuggacuacaucg	hsa-miR-455-5p	Down
hsa-miR-584	0.70094	0.397467	-0.850336	-5.711	-0.655022	uuaugguuugccugggacugag	hsa-miR-584	Down
hsa-miR-518e*	0.70094	0.399585	0.84651	-5.715	0.33986	cucuagagggaagcgcuuucug	hsa-miR-518e*	Up
hsa-miR-30c-2*	0.70094	0.401319	-0.843388	-5.717	-0.65779	cugggagaaggcuguuuacucu	hsa-miR-30c-2*	Down
hsa-miR-374b*	0.70094	0.401787	-0.842546	-5.718	-0.599315	cuuagcagguuguauuaucauu	hsa-miR-374b*	Down
hsa-miR-1305	0.70094	0.401909	-0.842328	-5.718	-0.333513	uuuucaacucuaaugggagaga	hsa-miR-1305	Down
hsa-miR-99a	0.70094	0.402762	-0.840795	-5.719	-0.353377	aacccguagauccgaucuugug	hsa-miR-99a	Down
hsa-miR-1278	0.70094	0.403139	-0.840119	-5.72	-0.330206	uaguacugugcauaucaucuau	hsa-miR-1278	Down
hsa-miR-1304	0.70094	0.403812	-0.838914	-5.721	-0.348274	uuugaggcuacagugagaugug	hsa-miR-1304	Down
hsa-let-7f	0.70094	0.404386	-0.837884	-5.721	-0.427719	ugagguaguagauuguauaguu	hsa-let-7f	Down
hsa-miR-1254	0.70094	0.404482	0.837713	-5.722	0.389344	agccuggaagcuggagccugcagu	hsa-miR-1254	Up
hsa-miR-628-5p	0.70179	0.407651	0.832055	-5.726	0.302788	augcugacauauuuacuagagg	hsa-miR-628-5p	Up
hsa-miR-1826	0.70179	0.408359	0.830795	-5.727	0.2691	auugaucaucgacacuucgaacgcaau	hsa-miR-1826	Up
hsa-miR-502-3p	0.70179	0.408566	0.830426	-5.727	0.208115	aaugcaccugggcaaggauuca	hsa-miR-502-3p	Up
hsa-miR-10b*	0.70179	0.409346	-0.829038	-5.728	-0.446773	acagauucgauucuaggggaau	hsa-miR-10b*	Down
hsa-miR-521	0.70179	0.410348	-0.827259	-5.73	-0.395972	aacgcacuucccuuuagagugu	hsa-miR-521	Down
hsa-miR-567	0.70179	0.410501	-0.826988	-5.73	-0.518184	aguauguucuuccaggacagaac	hsa-miR-567	Down
hsa-miR-626	0.70179	0.411266	0.825632	-5.731	0.555126	agcugucugaaaaugucuu	hsa-miR-626	Up
hsa-miR-154*	0.70179	0.411481	0.825252	-5.731	0.529204	aaucauacacgguugaccuauu	hsa-miR-154*	Up
hsa-miR-516b	0.70591	0.414713	0.81954	-5.736	0.479234	aucuggagguaagaagcacuuu	hsa-miR-516b	Up
hsa-miR-596	0.70627	0.415741	0.817728	-5.737	0.255918	aagccugcccggcuccucggg	hsa-miR-596	Up
hsa-miR-373*	0.70889	0.418539	-0.812812	-5.741	-0.523774	acucaaaaugggggcgcuuucc	hsa-miR-373*	Down
hsa-miR-1208	0.70889	0.41964	-0.810883	-5.743	-0.294739	ucacuguucagacaggcgga	hsa-miR-1208	Down
hsa-miR-575	0.70889	0.419748	0.810695	-5.743	0.215637	gagccaguuggacaggagc	hsa-miR-575	Up
hsa-miR-340*	0.71182	0.422308	-0.806223	-5.746	-0.571938	uccgucucaguuacuuuauagc	hsa-miR-340*	Down
hsa-miR-525-5p	0.71788	0.426736	0.798523	-5.752	0.300228	cuccagagggaugcacuuucu	hsa-miR-525-5p	Up
hsa-miR-137	0.71866	0.428032	0.79628	-5.754	0.254572	uuauugcuuaagaauacgcguag	hsa-miR-137	Up
hsa-miR-515-5p	0.72189	0.431659	0.79002	-5.758	0.258186	uucuccaaaagaaagcacuuucug	hsa-miR-515-5p	Up
hsa-miR-449b	0.72189	0.432429	0.788696	-5.759	0.496039	aggcaguguauuguuagcuggc	hsa-miR-449b	Up
hsa-miR-1263	0.72189	0.432465	-0.788633	-5.759	-0.286645	augguacccuggcauacugagu	hsa-miR-1263	Down
hsa-miR-324-5p	0.72222	0.433501	0.786853	-5.761	0.199134	cgcauccccuagggcauuggugu	hsa-miR-324-5p	Up
hsa-miR-551b	0.72922	0.439845	0.776007	-5.769	0.361407	gcgacccauacuugguuucag	hsa-miR-551b	Up
hsa-miR-18a	0.72922	0.440489	0.774911	-5.77	0.32186	uaaggugcaucuagugcagauag	hsa-miR-18a	Up
hsa-miR-452*	0.72922	0.440927	0.774165	-5.77	0.297938	cucaucugcaaagaaguaagug	hsa-miR-452*	Up
hsa-miR-1468	0.72922	0.442412	-0.771643	-5.772	-0.489624	cuccguuugccuguuucgcug	hsa-miR-1468	Down
hsa-miR-429	0.72922	0.442526	-0.771449	-5.772	-0.57952	uaauacugucugguaaaaccgu	hsa-miR-429	Down
hsa-miR-124*	0.72922	0.442771	0.771034	-5.772	0.261937	cguguucacagcggaccuugau	hsa-miR-124*	Up
hsa-miR-645	0.73226	0.445465	0.766474	-5.776	0.473229	ucuaggcugguacugcuga	hsa-miR-645	Up
hsa-miR-652	0.74114	0.451729	-0.755928	-5.783	-0.174828	aauggcgccacuaggguugug	hsa-miR-652	Down
hsa-miR-205	0.74114	0.452585	-0.754495	-5.784	-0.398292	uccuucauuccaccggagucug	hsa-miR-205	Down
hsa-miR-143	0.74232	0.454928	0.750576	-5.787	0.260464	ugagaugaagcacuguagcuc	hsa-miR-143	Up
hsa-miR-202	0.74232	0.455028	-0.750409	-5.787	-0.552168	agagguauagggcaugggaa	hsa-miR-202	Down
hsa-miR-1915	0.74244	0.45596	0.748855	-5.789	0.21851	ccccagggcgacgcggcggg	hsa-miR-1915	Up
hsa-miR-92a	0.74378	0.458398	-0.744796	-5.791	-0.122516	uauugcacuugucccggccugu	hsa-miR-92a	Down
hsa-miR-1288	0.74378	0.459033	-0.74374	-5.792	-0.453573	uggacugcccugaucuggaga	hsa-miR-1288	Down
hsa-miR-1321	0.74378	0.459366	0.743187	-5.793	0.551164	cagggaggugaaugugau	hsa-miR-1321	Up
hsa-miR-514	0.74544	0.4615	-0.739648	-5.795	-0.463544	auugacacuucugugaguaga	hsa-miR-514	Down
hsa-miR-200c*	0.74544	0.462124	-0.738615	-5.796	-0.368682	cgucuuacccagcaguguuugg	hsa-miR-200c*	Down
hsa-miR-105	0.74715	0.46448	0.734722	-5.798	0.356497	ucaaaugcucagacuccuguggu	hsa-miR-105	Up
hsa-miR-7-1*	0.74715	0.464912	-0.73401	-5.799	-0.205422	caacaaaucacagucugccaua	hsa-miR-7-1*	Down
hsa-miR-886-3p	0.74799	0.466305	0.731714	-5.801	0.539556	cgcgggugcuuacugacccuu	hsa-miR-886-3p	Up
hsa-miR-142-5p	0.74809	0.467233	0.730186	-5.802	0.222163	cauaaaguagaaagcacuacu	hsa-miR-142-5p	Up
hsa-miR-664*	0.75319	0.471993	0.722381	-5.807	0.337257	acuggcuagggaaaaugauuggau	hsa-miR-664*	Up
hsa-miR-448	0.75319	0.472768	0.721114	-5.808	0.382854	uugcauauguaggaugucccau	hsa-miR-448	Up
hsa-miR-17	0.75319	0.473033	0.720681	-5.808	0.336921	caaagugcuuacagugcagguag	hsa-miR-17	Up
hsa-miR-29b-1*	0.75322	0.474091	0.718955	-5.809	0.53822	gcugguuucauauggugguuuaga	hsa-miR-29b-1*	Up
hsa-miR-375	0.75322	0.475208	-0.717133	-5.811	-0.541059	uuuguucguucggcucgcguga	hsa-miR-375	Down
hsa-miR-597	0.75322	0.476814	0.71452	-5.812	0.27127	ugugucacucgaugaccacugu	hsa-miR-597	Up
hsa-miR-132*	0.75322	0.47754	-0.713339	-5.813	-0.441312	accguggcuuucgauuguuacu	hsa-miR-132*	Down
hsa-miR-223*	0.75322	0.478836	-0.711236	-5.815	-0.416582	cguguauuugacaagcugaguu	hsa-miR-223*	Down
hsa-miR-143*	0.75322	0.481085	0.707594	-5.817	0.226171	ggugcagugcugcaucucuggu	hsa-miR-143*	Up
hsa-miR-548c-3p	0.75322	0.481159	-0.707474	-5.817	-0.463023	caaaaaucucaauuacuuuugc	hsa-miR-548c-3p	Down
hsa-miR-609	0.75322	0.481678	-0.706633	-5.818	-0.503002	aggguguuucucucaucucu	hsa-miR-609	Down
hsa-miR-587	0.75322	0.481931	-0.706224	-5.818	-0.434401	uuuccauaggugaugagucac	hsa-miR-587	Down
hsa-miR-640	0.75322	0.482094	-0.705962	-5.818	-0.294757	augauccaggaaccugccucu	hsa-miR-640	Down
hsa-miR-93*	0.75322	0.483254	-0.704088	-5.819	-0.192685	acugcugagcuagcacuucccg	hsa-miR-93*	Down
hsa-miR-607	0.75322	0.483527	-0.703648	-5.82	-0.232216	guucaaauccagaucuauaac	hsa-miR-607	Down
hsa-miR-662	0.75567	0.485973	-0.699707	-5.822	-0.396572	ucccacguuguggcccagcag	hsa-miR-662	Down
hsa-miR-641	0.75576	0.487018	0.698026	-5.823	0.318881	aaagacauaggauagagucaccuc	hsa-miR-641	Up
hsa-miR-1827	0.75576	0.488407	0.695796	-5.825	0.436967	ugaggcaguagauugaau	hsa-miR-1827	Up
hsa-miR-103	0.75576	0.489379	0.694237	-5.826	0.247742	agcagcauuguacagggcuauga	hsa-miR-103	Up
hsa-miR-1283	0.75576	0.489535	-0.693988	-5.826	-0.204899	ucuacaaaggaaagcgcuuucu	hsa-miR-1283	Down
hsa-miR-504	0.75877	0.492364	-0.689461	-5.829	-0.44748	agacccuggucugcacucuauc	hsa-miR-504	Down
hsa-miR-569	0.76307	0.496042	0.683597	-5.833	0.470134	aguuaaugaauccuggaaagu	hsa-miR-569	Up
hsa-miR-520d-5p	0.76583	0.498847	0.679142	-5.836	0.255341	cuacaaagggaagcccuuuc	hsa-miR-520d-5p	Up
hsa-miR-100	0.76583	0.499606	0.677939	-5.837	0.341882	aacccguagauccgaacuugug	hsa-miR-100	Up
hsa-miR-512-5p	0.77074	0.503973	-0.671033	-5.841	-0.244173	cacucagccuugagggcacuuuc	hsa-miR-512-5p	Down
hsa-miR-302b	0.77074	0.504598	-0.670048	-5.842	-0.458601	uaagugcuuccauguuuuaguag	hsa-miR-302b	Down
hsa-miR-616*	0.77452	0.507973	0.664738	-5.845	0.330073	acucaaaacccuucagugacuu	hsa-miR-616*	Up
hsa-miR-582-3p	0.7747	0.510011	0.661538	-5.847	0.318831	uaacugguugaacaacugaacc	hsa-miR-582-3p	Up
hsa-miR-1229	0.7747	0.510732	-0.66041	-5.848	-0.298988	cucucaccacugcccucccacag	hsa-miR-1229	Down
hsa-miR-20b	0.7747	0.511113	0.659813	-5.848	0.308491	caaagugcucauagugcagguag	hsa-miR-20b	Up
hsa-miR-181a-2*	0.7747	0.51168	-0.658925	-5.849	-0.305416	accacugaccguugacuguacc	hsa-miR-181a-2*	Down
hsa-miR-1274b	0.77506	0.513122	-0.656671	-5.85	-0.244388	ucccuguucgggcgcca	hsa-miR-1274b	Down
hsa-miR-125b-1*	0.77506	0.514466	-0.654573	-5.851	-0.492284	acggguuaggcucuugggagcu	hsa-miR-125b-1*	Down
hsa-miR-432*	0.77506	0.514609	0.65435	-5.852	0.368558	cuggauggcuccuccaugucu	hsa-miR-432*	Up
hsa-miR-33a*	0.77853	0.51918	-0.647236	-5.856	-0.164601	caauguuuccacagugcaucac	hsa-miR-33a*	Down
hsa-miR-198	0.77853	0.519234	0.647151	-5.856	0.405403	gguccagaggggagauagguuc	hsa-miR-198	Up
hsa-miR-325	0.77853	0.519647	0.64651	-5.856	0.322136	ccuaguagguguccaguaagugu	hsa-miR-325	Up
hsa-let-7g	0.77853	0.520523	-0.645151	-5.857	-0.429072	ugagguaguaguuuguacaguu	hsa-let-7g	Down
hsa-miR-105*	0.77957	0.52212	-0.642677	-5.859	-0.463872	acggauguuugagcaugugcua	hsa-miR-105*	Down
hsa-miR-553	0.78062	0.524988	0.638243	-5.861	0.436244	aaaacggugagauuuuguuuu	hsa-miR-553	Up
hsa-miR-130b	0.78062	0.525525	0.637414	-5.862	0.200645	cagugcaaugaugaaagggcau	hsa-miR-130b	Up
hsa-miR-15b*	0.78062	0.525536	0.637397	-5.862	0.303732	cgaaucauuauuugcugcucua	hsa-miR-15b*	Up
hsa-miR-122	0.78077	0.526545	0.635841	-5.863	0.483858	uggagugugacaaugguguuug	hsa-miR-122	Up
hsa-miR-125a-3p	0.78119	0.527731	0.634015	-5.864	0.445707	acaggugagguucuugggagcc	hsa-miR-125a-3p	Up
hsa-miR-643	0.79195	0.535917	0.621462	-5.872	0.41281	acuuguaugcuagcucagguag	hsa-miR-643	Up
hsa-miR-550	0.792	0.536869	0.620009	-5.872	0.19277	agugccugagggaguaagagccc	hsa-miR-550	Up
hsa-miR-614	0.79824	0.542341	-0.61168	-5.877	-0.384151	gaacgccuguucuugccaggugg	hsa-miR-614	Down
hsa-miR-93	0.79824	0.542953	0.61075	-5.878	0.217688	caaagugcuguucgugcagguag	hsa-miR-93	Up
hsa-miR-339-3p	0.8006	0.545562	0.606797	-5.88	0.170265	ugagcgccucgacgacagagccg	hsa-miR-339-3p	Up
hsa-miR-155*	0.8006	0.546411	-0.605514	-5.881	-0.277413	cuccuacauauuagcauuaaca	hsa-miR-155*	Down
hsa-miR-874	0.80151	0.549057	0.601515	-5.883	0.141935	cugcccuggcccgagggaccga	hsa-miR-874	Up
hsa-miR-130a	0.80151	0.551344	0.59807	-5.885	0.23808	cagugcaauguuaaaagggcau	hsa-miR-130a	Up
hsa-miR-622	0.80151	0.551469	0.597882	-5.885	0.273956	acagucugcugagguuggagc	hsa-miR-622	Up
hsa-miR-486-5p	0.80151	0.551671	0.597577	-5.885	0.0625592	uccuguacugagcugccccgag	hsa-miR-486-5p	Up
hsa-miR-16-1*	0.80151	0.551677	0.597568	-5.885	0.260604	ccaguauuaacugugcugcuga	hsa-miR-16-1*	Up
hsa-miR-1277	0.80248	0.553276	0.595163	-5.887	0.273359	uacguagauauauauguauuuu	hsa-miR-1277	Up
hsa-miR-562	0.80354	0.55617	-0.590818	-5.889	-0.383383	aggcugcggaauucaggac	hsa-miR-562	Down
hsa-miR-181c*	0.80354	0.556466	-0.590375	-5.89	-0.318406	aaccaucgaccguugaguggac	hsa-miR-181c*	Down
hsa-miR-367	0.80354	0.556834	0.589824	-5.89	0.141404	aauugcacuuuagcaaugguga	hsa-miR-367	Up
hsa-miR-100*	0.80354	0.55849	0.587345	-5.891	0.267489	caagcuuguaucuauagguaug	hsa-miR-100*	Up
hsa-miR-1913	0.80354	0.559569	-0.585731	-5.892	-0.202348	ucugcccccuccgcugcugcca	hsa-miR-1913	Down
hsa-let-7a	0.80354	0.562086	0.581973	-5.894	0.341959	ugagguaguagguuguauaguu	hsa-let-7a	Up
hsa-miR-374b	0.80354	0.562392	0.581518	-5.894	0.197882	auauaauacaaccugcuaagug	hsa-miR-374b	Up
hsa-miR-181a*	0.80354	0.563097	0.580466	-5.895	0.218622	accaucgaccguugauuguacc	hsa-miR-181a*	Up
hsa-miR-1909*	0.80354	0.563129	0.580419	-5.895	0.339729	ugagugccggugccugcccug	hsa-miR-1909*	Up
hsa-miR-877	0.80354	0.563313	-0.580146	-5.895	-0.280163	guagaggagauggcgcaggg	hsa-miR-877	Down
hsa-miR-601	0.80722	0.566831	0.574912	-5.898	0.42774	uggucuaggauuguuggaggag	hsa-miR-601	Up
hsa-miR-219-5p	0.80734	0.567853	-0.573396	-5.899	-0.279327	ugauuguccaaacgcaauucu	hsa-miR-219-5p	Down
hsa-miR-619	0.80815	0.569354	0.57117	-5.9	0.269195	gaccuggacauguuugugcccagu	hsa-miR-619	Up
hsa-miR-558	0.8125	0.573964	0.564351	-5.904	0.324186	ugagcugcuguaccaaaau	hsa-miR-558	Up
hsa-miR-526b	0.8125	0.574304	0.56385	-5.904	0.273446	cucuugagggaagcacuuucugu	hsa-miR-526b	Up
hsa-miR-615-5p	0.81346	0.575924	0.561461	-5.905	0.267507	ggggguccccggugcucggauc	hsa-miR-615-5p	Up
hsa-miR-520d-3p	0.8295	0.588351	-0.54324	-5.915	-0.408202	aaagugcuucucuuuggugggu	hsa-miR-520d-3p	Down
hsa-miR-548g	0.8295	0.589203	-0.541997	-5.916	-0.401127	aaaacuguaauuacuuuuguac	hsa-miR-548g	Down
hsa-miR-25	0.83249	0.592293	0.537498	-5.918	0.0921893	cauugcacuugucucggucuga	hsa-miR-25	Up
hsa-miR-551a	0.83377	0.594168	0.534773	-5.919	0.292291	gcgacccacucuugguuucca	hsa-miR-551a	Up
hsa-miR-99b	0.83434	0.597174	0.530413	-5.922	0.189581	cacccguagaaccgaccuugcg	hsa-miR-99b	Up
hsa-miR-1294	0.83434	0.597683	-0.529675	-5.922	-0.422011	ugugagguuggcauuguugucu	hsa-miR-1294	Down
hsa-miR-134	0.83434	0.597927	0.529322	-5.922	0.281951	ugugacugguugaccagagggg	hsa-miR-134	Up
hsa-miR-362-3p	0.83434	0.598443	-0.528575	-5.922	-0.169944	aacacaccuauucaaggauuca	hsa-miR-362-3p	Down
hsa-miR-1227	0.83558	0.600299	0.525891	-5.924	0.18627	cgugccacccuuuuccccag	hsa-miR-1227	Up
hsa-miR-483-5p	0.83844	0.603324	0.521523	-5.926	0.284097	aagacgggaggaaagaagggag	hsa-miR-483-5p	Up
hsa-miR-200c	0.84056	0.605826	0.51792	-5.928	0.112927	uaauacugccggguaaugaugga	hsa-miR-200c	Up
hsa-miR-378	0.84406	0.609331	-0.512882	-5.93	-0.203162	acuggacuuggagucagaagg	hsa-miR-378	Down
hsa-miR-524-5p	0.84758	0.613075	-0.507515	-5.933	-0.219646	cuacaaagggaagcacuuucuc	hsa-miR-524-5p	Down
hsa-miR-523	0.84758	0.614351	-0.505689	-5.934	-0.15499	gaacgcgcuucccuauagagggu	hsa-miR-523	Down
hsa-miR-30b	0.84758	0.614812	0.50503	-5.934	0.112189	uguaaacauccuacacucagcu	hsa-miR-30b	Up
hsa-miR-708	0.84808	0.618479	-0.499794	-5.937	-0.341917	aaggagcuuacaaucuagcuggg	hsa-miR-708	Down
hsa-miR-28-5p	0.84808	0.61863	-0.499579	-5.937	-0.128733	aaggagcucacagucuauugag	hsa-miR-28-5p	Down
hsa-miR-497*	0.84808	0.619062	0.498963	-5.937	0.109863	caaaccacacugugguguuaga	hsa-miR-497*	Up
hsa-miR-519b-3p	0.84808	0.619108	0.498897	-5.937	0.31891	aaagugcauccuuuuagagguu	hsa-miR-519b-3p	Up
hsa-miR-487a	0.84891	0.621325	-0.49574	-5.939	-0.170158	aaucauacagggacauccaguu	hsa-miR-487a	Down
hsa-miR-10b	0.84891	0.622757	0.493703	-5.939	0.20756	uacccuguagaaccgaauuugug	hsa-miR-10b	Up
hsa-miR-454	0.84891	0.623744	0.4923	-5.94	0.222324	uagugcaauauugcuuauagggu	hsa-miR-454	Up
hsa-miR-519e	0.84891	0.624243	-0.491592	-5.94	-0.335216	aagugccuccuuuuagaguguu	hsa-miR-519e	Down
hsa-miR-421	0.84891	0.624633	-0.491038	-5.941	-0.230326	aucaacagacauuaauugggcgc	hsa-miR-421	Down
hsa-miR-653	0.84937	0.626385	0.488552	-5.942	0.349783	guguugaaacaaucucuacug	hsa-miR-653	Up
hsa-miR-217	0.84937	0.62694	0.487765	-5.942	0.191516	uacugcaucaggaacugauugga	hsa-miR-217	Up
hsa-miR-216b	0.85033	0.629396	0.484288	-5.944	0.162141	aaaucucugcaggcaaauguga	hsa-miR-216b	Up
hsa-miR-526b*	0.85033	0.630246	-0.483086	-5.944	-0.335104	gaaagugcuuccuuuuagaggc	hsa-miR-526b*	Down
hsa-miR-16-2*	0.85033	0.630602	0.482582	-5.945	0.18871	ccaauauuacugugcugcuuua	hsa-miR-16-2*	Up
hsa-miR-660	0.85466	0.636775	-0.473873	-5.949	-0.152529	uacccauugcauaucggaguug	hsa-miR-660	Down
hsa-miR-199a-5p	0.85466	0.637938	-0.472235	-5.949	-0.159058	cccaguguucagacuaccuguuc	hsa-miR-199a-5p	Down
hsa-miR-34a	0.85466	0.638962	0.470795	-5.95	0.301971	uggcagugucuuagcugguugu	hsa-miR-34a	Up
hsa-miR-518c	0.85466	0.639085	-0.470624	-5.95	-0.189849	caaagcgcuucucuuuagagugu	hsa-miR-518c	Down
hsa-miR-484	0.85466	0.63939	-0.470194	-5.95	-0.0773669	ucaggcucaguccccucccgau	hsa-miR-484	Down
hsa-miR-132	0.85466	0.639935	0.469428	-5.951	0.165551	uaacagucuacagccauggucg	hsa-miR-132	Up
hsa-miR-200a	0.85466	0.64075	0.468284	-5.951	0.187823	uaacacugucugguaacgaugu	hsa-miR-200a	Up
hsa-let-7f-2*	0.86174	0.647905	-0.458261	-5.956	-0.310726	cuauacagucuacugucuuucc	hsa-let-7f-2*	Down
hsa-miR-744	0.86174	0.648335	0.45766	-5.956	0.182922	ugcggggcuagggcuaacagca	hsa-miR-744	Up
hsa-miR-486-3p	0.86174	0.649048	-0.456664	-5.956	-0.145226	cggggcagcucaguacaggau	hsa-miR-486-3p	Down
hsa-miR-34c-5p	0.86374	0.652354	-0.452052	-5.958	-0.264514	aggcaguguaguuagcugauugc	hsa-miR-34c-5p	Down
hsa-miR-554	0.86374	0.652793	0.451441	-5.959	0.145477	gcuaguccugacucagccagu	hsa-miR-554	Up
hsa-miR-424*	0.86374	0.653707	-0.450167	-5.959	-0.144869	caaaacgugaggcgcugcuau	hsa-miR-424*	Down
hsa-miR-144*	0.86374	0.655615	-0.447512	-5.96	-0.18905	ggauaucaucauauacuguaag	hsa-miR-144*	Down
hsa-miR-379	0.86374	0.657217	-0.445285	-5.961	-0.326938	ugguagacuauggaacguagg	hsa-miR-379	Down
hsa-miR-1912	0.86374	0.657465	0.444941	-5.961	0.124393	uacccagagcaugcagugugaa	hsa-miR-1912	Up
hsa-miR-23a	0.86374	0.657562	0.444805	-5.961	0.0860962	aucacauugccagggauuucc	hsa-miR-23a	Up
hsa-miR-620	0.87077	0.664816	0.434753	-5.966	0.303134	auggagauagauauagaaau	hsa-miR-620	Up
hsa-miR-577	0.87077	0.664931	-0.434593	-5.966	-0.302077	uagauaaaauauugguaccug	hsa-miR-577	Down
hsa-miR-145	0.87121	0.666278	0.432732	-5.966	0.173516	guccaguuuucccaggaaucccu	hsa-miR-145	Up
hsa-miR-525-3p	0.87122	0.667568	0.43095	-5.967	0.162729	gaaggcgcuucccuuuagagcg	hsa-miR-525-3p	Up
hsa-miR-187*	0.87122	0.668846	0.429186	-5.968	0.160373	ggcuacaacacaggacccgggc	hsa-miR-187*	Up
hsa-miR-27b*	0.87122	0.669314	-0.428541	-5.968	-0.134871	agagcuuagcugauuggugaac	hsa-miR-27b*	Down
hsa-miR-191	0.87162	0.67063	0.426727	-5.969	0.0721534	caacggaaucccaaaagcagcug	hsa-miR-191	Up
hsa-miR-218	0.87181	0.671788	0.425132	-5.97	0.254373	uugugcuugaucuaaccaugu	hsa-miR-218	Up
hsa-miR-1825	0.87206	0.67299	-0.423477	-5.97	-0.248989	uccagugcccuccucucc	hsa-miR-1825	Down
hsa-miR-193a-5p	0.87605	0.677894	0.416738	-5.973	0.19386	ugggucuuugcgggcgagauga	hsa-miR-193a-5p	Up
hsa-miR-606	0.87605	0.678104	-0.41645	-5.973	-0.25082	aaacuacugaaaaucaaagau	hsa-miR-606	Down
hsa-miR-33b	0.87688	0.680047	0.413785	-5.974	0.139537	gugcauugcuguugcauugc	hsa-miR-33b	Up
hsa-miR-548d-3p	0.87688	0.681509	-0.411783	-5.975	-0.222535	caaaaaccacaguuucuuuugc	hsa-miR-548d-3p	Down
hsa-miR-628-3p	0.87688	0.681794	0.411393	-5.975	0.10849	ucuaguaagaguggcagucga	hsa-miR-628-3p	Up
hsa-miR-532-5p	0.87713	0.683323	0.4093	-5.976	0.123881	caugccuugaguguaggaccgu	hsa-miR-532-5p	Up
hsa-miR-615-3p	0.87713	0.68402	-0.408347	-5.976	-0.284786	uccgagccugggucucccucuu	hsa-miR-615-3p	Down
hsa-miR-552	0.8772	0.685091	0.406882	-5.977	0.266699	aacaggugacugguuagacaa	hsa-miR-552	Up
hsa-miR-126*	0.87775	0.68654	-0.404903	-5.978	-0.275439	cauuauuacuuuugguacgcg	hsa-miR-126*	Down
hsa-miR-570	0.87834	0.688014	0.402892	-5.978	0.181514	cgaaaacagcaauuaccuuugc	hsa-miR-570	Up
hsa-miR-139-5p	0.87856	0.689206	0.401266	-5.979	0.124359	ucuacagugcacgugucuccag	hsa-miR-139-5p	Up
hsa-miR-208a	0.87992	0.692472	0.396816	-5.981	0.207423	auaagacgagcaaaaagcuugu	hsa-miR-208a	Up
hsa-miR-377*	0.87992	0.692918	-0.39621	-5.981	-0.282491	agagguugcccuuggugaauuc	hsa-miR-377*	Down
hsa-miR-1293	0.87992	0.693335	0.395643	-5.981	0.319156	uggguggucuggagauuugugc	hsa-miR-1293	Up
hsa-miR-101*	0.88068	0.69495	0.393447	-5.982	0.216703	caguuaucacagugcugaugcu	hsa-miR-101*	Up
hsa-miR-520c-3p	0.8821	0.697095	0.390532	-5.983	0.270986	aaagugcuuccuuuuagagggu	hsa-miR-520c-3p	Up
hsa-miR-517a	0.88306	0.69888	-0.388111	-5.984	-0.254666	aucgugcaucccuuuagagugu	hsa-miR-517a	Down
hsa-miR-29b	0.88434	0.700917	0.385349	-5.985	0.0989396	uagcaccauuugaaaucaguguu	hsa-miR-29b	Up
hsa-miR-1280	0.88469	0.702217	0.383588	-5.986	0.122739	ucccaccgcugccaccc	hsa-miR-1280	Up
hsa-miR-1287	0.88553	0.704249	0.380839	-5.987	0.165421	ugcuggaucagugguucgaguc	hsa-miR-1287	Up
hsa-miR-548p	0.88553	0.705323	-0.379386	-5.987	-0.156449	uagcaaaaacugcaguuacuuu	hsa-miR-548p	Down
hsa-miR-1207-3p	0.88553	0.707842	0.375983	-5.988	0.239344	ucagcuggcccucauuuc	hsa-miR-1207-3p	Up
hsa-miR-938	0.88553	0.708737	-0.374776	-5.989	-0.149423	ugcccuuaaaggugaacccagu	hsa-miR-938	Down
hsa-miR-1234	0.88553	0.708811	0.374676	-5.989	0.11787	ucggccugaccacccaccccac	hsa-miR-1234	Up
hsa-miR-624	0.88553	0.709422	-0.373852	-5.989	-0.238488	cacaagguauugguauuaccu	hsa-miR-624	Down
hsa-miR-632	0.88553	0.712767	-0.369343	-5.991	-0.23634	gugucugcuuccuguggga	hsa-miR-632	Down
hsa-miR-639	0.88553	0.713614	0.368203	-5.991	0.150213	aucgcugcgguugcgagcgcugu	hsa-miR-639	Up
hsa-miR-630	0.88553	0.715432	-0.365758	-5.992	-0.243803	aguauucuguaccagggaaggu	hsa-miR-630	Down
hsa-miR-548a-3p	0.88553	0.717477	-0.363009	-5.993	-0.165432	caaaacuggcaauuacuuuugc	hsa-miR-548a-3p	Down
hsa-miR-519a	0.88553	0.718431	-0.361727	-5.993	-0.216337	aaagugcauccuuuuagagugu	hsa-miR-519a	Down
hsa-miR-765	0.88553	0.719847	0.359826	-5.994	0.24717	uggaggagaaggaaggugaug	hsa-miR-765	Up
hsa-let-7i	0.88553	0.720342	-0.359162	-5.994	-0.237818	ugagguaguaguuugugcuguu	hsa-let-7i	Down
hsa-miR-410	0.88553	0.721315	-0.357857	-5.995	-0.184389	aauauaacacagauggccugu	hsa-miR-410	Down
hsa-miR-505*	0.88553	0.723092	0.355475	-5.996	0.117467	gggagccaggaaguauugaugu	hsa-miR-505*	Up
hsa-miR-1225-3p	0.88553	0.724261	0.353909	-5.996	0.0985107	ugagccccugugccgcccccag	hsa-miR-1225-3p	Up
hsa-miR-32	0.88553	0.724281	-0.353882	-5.996	-0.102556	uauugcacauuacuaaguugca	hsa-miR-32	Down
hsa-miR-151-5p	0.88553	0.72442	0.353697	-5.996	0.0948262	ucgaggagcucacagucuagu	hsa-miR-151-5p	Up
hsa-miR-145*	0.88553	0.724422	0.353693	-5.996	0.21247	ggauuccuggaaauacuguucu	hsa-miR-145*	Up
hsa-miR-487b	0.88553	0.725546	0.35219	-5.997	0.108143	aaucguacagggucauccacuu	hsa-miR-487b	Up
hsa-miR-361-3p	0.88553	0.725608	0.352107	-5.997	0.107946	ucccccaggugugauucugauuu	hsa-miR-361-3p	Up
hsa-miR-663b	0.88553	0.72659	0.350793	-5.997	0.195618	gguggcccggccgugccugagg	hsa-miR-663b	Up
hsa-miR-515-3p	0.88553	0.727171	-0.350016	-5.997	-0.247198	gagugccuucuuuuggagcguu	hsa-miR-515-3p	Down
hsa-miR-96*	0.88553	0.728146	0.348712	-5.998	0.153796	aaucaugugcagugccaauaug	hsa-miR-96*	Up
hsa-miR-548n	0.88553	0.728533	-0.348195	-5.998	-0.213876	caaaaguaauuguggauuuugu	hsa-miR-548n	Down
hsa-miR-202*	0.88933	0.732692	0.342642	-6	0.146475	uuccuaugcauauacuucuuug	hsa-miR-202*	Up
hsa-miR-106b	0.89181	0.735772	0.338538	-6.001	0.152665	uaaagugcugacagugcagau	hsa-miR-106b	Up
hsa-miR-488*	0.89299	0.73816	-0.335359	-6.002	-0.130765	cccagauaauggcacucucaa	hsa-miR-488*	Down
hsa-miR-1201	0.89299	0.740175	0.332679	-6.003	0.207864	agccugauuaaacacaugcucuga	hsa-miR-1201	Up
hsa-miR-377	0.89299	0.741126	0.331415	-6.003	0.0785326	aucacacaaaggcaacuuuugu	hsa-miR-377	Up
hsa-miR-491-5p	0.89299	0.741978	0.330283	-6.004	0.136696	aguggggaacccuuccaugagg	hsa-miR-491-5p	Up
hsa-miR-631	0.89299	0.742418	0.329699	-6.004	0.077138	agaccuggcccagaccucagc	hsa-miR-631	Up
hsa-miR-92a-2*	0.89299	0.742953	0.328988	-6.004	0.262456	ggguggggauuuguugcauuac	hsa-miR-92a-2*	Up
hsa-miR-599	0.8964	0.746829	-0.323847	-6.006	-0.20698	guugugucaguuuaucaaac	hsa-miR-599	Down
hsa-miR-220c	0.89659	0.74802	0.322269	-6.006	0.0877226	acacagggcuguugugaagacu	hsa-miR-220c	Up
hsa-miR-633	0.89763	0.750797	0.318594	-6.007	0.165106	cuaauaguaucuaccacaauaaa	hsa-miR-633	Up
hsa-miR-1233	0.89763	0.752178	0.316767	-6.008	0.110925	ugagcccuguccucccgcag	hsa-miR-1233	Up
hsa-miR-512-3p	0.89763	0.753389	-0.315166	-6.008	-0.210942	aagugcugucauagcugagguc	hsa-miR-512-3p	Down
hsa-miR-1276	0.89763	0.754709	0.313421	-6.009	0.190929	uaaagagcccuguggagaca	hsa-miR-1276	Up
hsa-miR-1274a	0.89763	0.756238	-0.311403	-6.01	-0.0880207	gucccuguucaggcgcca	hsa-miR-1274a	Down
hsa-miR-191*	0.89763	0.756466	0.311101	-6.01	0.182142	gcugcgcuuggauuucgucccc	hsa-miR-191*	Up
hsa-miR-591	0.89763	0.75762	-0.309578	-6.01	-0.117207	agaccauggguucucauugu	hsa-miR-591	Down
hsa-miR-604	0.89763	0.75865	0.30822	-6.011	0.0968994	aggcugcggaauucaggac	hsa-miR-604	Up
hsa-miR-644	0.89763	0.758821	-0.307995	-6.011	-0.25214	aguguggcuuucuuagagc	hsa-miR-644	Down
hsa-miR-101	0.89763	0.759788	0.30672	-6.011	0.124345	uacaguacugugauaacugaa	hsa-miR-101	Up
hsa-miR-518d-3p	0.89763	0.760866	0.305299	-6.011	0.112891	caaagcgcuucccuuuggagc	hsa-miR-518d-3p	Up
hsa-miR-891b	0.89763	0.761373	-0.304631	-6.012	-0.0907704	ugcaacuuaccugagucauuga	hsa-miR-891b	Down
hsa-miR-886-5p	0.89809	0.763437	0.301914	-6.012	0.0870888	cgggucggaguuagcucaagcgg	hsa-miR-886-5p	Up
hsa-miR-659	0.89809	0.764232	-0.300868	-6.013	-0.0995275	cuugguucagggagggucccca	hsa-miR-659	Down
hsa-miR-675	0.89809	0.765481	0.299224	-6.013	0.13326	uggugcggagagggcccacagug	hsa-miR-675	Up
hsa-miR-1181	0.89809	0.765928	0.298637	-6.013	0.104477	ccgucgccgccacccgagccg	hsa-miR-1181	Up
hsa-miR-196a	0.89818	0.768956	0.294657	-6.014	0.186529	uagguaguuucauguuguuggg	hsa-miR-196a	Up
hsa-miR-218-1*	0.89818	0.770388	-0.292777	-6.015	-0.127086	augguuccgucaagcaccaugg	hsa-miR-218-1*	Down
hsa-miR-19b-1*	0.89818	0.77073	0.292328	-6.015	0.131452	aguuuugcagguuugcauccagc	hsa-miR-19b-1*	Up
hsa-miR-199a-3p	0.89818	0.771662	0.291106	-6.015	0.0819032	acaguagucugcacauugguua	hsa-miR-199a-3p	Up
hsa-miR-638	0.89818	0.772141	0.290477	-6.016	0.12456	agggaucgcgggcggguggcggccu	hsa-miR-638	Up
hsa-miR-141*	0.89818	0.772251	0.290333	-6.016	0.0576877	caucuuccaguacaguguugga	hsa-miR-141*	Up
hsa-miR-369-5p	0.89898	0.77398	0.288066	-6.016	0.193202	agaucgaccguguuauauucgc	hsa-miR-369-5p	Up
hsa-miR-1910	0.90393	0.779412	0.280953	-6.018	0.161374	ccaguccugugccugccgccu	hsa-miR-1910	Up
hsa-miR-30d	0.90393	0.781106	-0.278738	-6.019	-0.0560661	uguaaacauccccgacuggaag	hsa-miR-30d	Down
hsa-miR-450a	0.90393	0.781385	0.278373	-6.019	0.1969	uuuugcgauguguuccuaauau	hsa-miR-450a	Up
hsa-miR-125b	0.90409	0.782564	-0.276833	-6.019	-0.130347	ucccugagacccuaacuuguga	hsa-miR-125b	Down
hsa-miR-193b	0.91186	0.790351	0.266672	-6.022	0.120693	aacuggcccucaaagucccgcu	hsa-miR-193b	Up
hsa-miR-634	0.91187	0.791418	-0.265283	-6.022	-0.104874	aaccagcaccccaacuuuggac	hsa-miR-634	Down
hsa-miR-212	0.91306	0.793509	0.26256	-6.023	0.0920207	uaacagucuccagucacggcc	hsa-miR-212	Up
hsa-miR-657	0.91368	0.795505	-0.259963	-6.024	-0.119574	ggcagguucucacccucucuagg	hsa-miR-657	Down
hsa-miR-608	0.91368	0.796861	0.2582	-6.024	0.201264	aggggugguguugggacagcuccgu	hsa-miR-608	Up
hsa-miR-516a-3p	0.91368	0.797224	0.257728	-6.024	0.179567	ugcuuccuuucagagggu	hsa-miR-516a-3p	Up
hsa-miR-513b	0.91461	0.799087	-0.255307	-6.025	-0.153867	uucacaaggaggugucauuuau	hsa-miR-513b	Down
hsa-miR-586	0.9156	0.801019	-0.252799	-6.025	-0.162002	uaugcauuguauuuuuaggucc	hsa-miR-586	Down
hsa-miR-517b	0.92159	0.807328	-0.244616	-6.027	-0.169287	ucgugcaucccuuuagaguguu	hsa-miR-517b	Down
hsa-miR-337-5p	0.92206	0.809559	0.241728	-6.028	0.134727	gaacggcuucauacaggaguu	hsa-miR-337-5p	Up
hsa-miR-1275	0.92206	0.809874	-0.241319	-6.028	-0.118277	gugggggagaggcuguc	hsa-miR-1275	Down
hsa-miR-24-1*	0.92321	0.812191	-0.238321	-6.029	-0.108252	ugccuacugagcugauaucagu	hsa-miR-24-1*	Down
hsa-miR-374a*	0.92321	0.813025	0.237242	-6.029	0.160891	cuuaucagauuguauuguaauu	hsa-miR-374a*	Up
hsa-miR-24-2*	0.92515	0.8158	-0.233655	-6.03	-0.0602314	ugccuacugagcugaaacacag	hsa-miR-24-2*	Down
hsa-miR-1260	0.92814	0.81952	0.228852	-6.031	0.0622123	aucccaccucugccacca	hsa-miR-1260	Up
hsa-miR-449a	0.92986	0.822644	0.224821	-6.032	0.155201	uggcaguguauuguuagcuggu	hsa-miR-449a	Up
hsa-miR-498	0.92986	0.823194	-0.224113	-6.032	-0.133229	uuucaagccagggggcguuuuuc	hsa-miR-498	Down
hsa-miR-598	0.92991	0.82522	0.221501	-6.032	0.12151	uacgucaucguugucaucguca	hsa-miR-598	Up
hsa-miR-593	0.92991	0.825503	-0.221137	-6.033	-0.172438	ugucucugcugggguuucu	hsa-miR-593	Down
hsa-miR-141	0.92991	0.826465	0.219898	-6.033	0.134984	uaacacugucugguaaagaugg	hsa-miR-141	Up
hsa-miR-1911	0.93122	0.828706	-0.217011	-6.033	-0.160118	ugaguaccgccaugucuguuggg	hsa-miR-1911	Down
hsa-miR-126	0.93215	0.830618	-0.214552	-6.034	-0.10768	ucguaccgugaguaauaaugcg	hsa-miR-126	Down
hsa-miR-27a*	0.93532	0.834897	-0.209049	-6.035	-0.129889	agggcuuagcugcuugugagca	hsa-miR-27a*	Down
hsa-miR-518c*	0.93532	0.835615	0.208128	-6.035	0.0982245	ucucuggagggaagcacuuucug	hsa-miR-518c*	Up
hsa-miR-125a-5p	0.93607	0.838085	-0.204954	-6.036	-0.0676426	ucccugagacccuuuaaccuguga	hsa-miR-125a-5p	Down
hsa-miR-10a	0.93607	0.838448	-0.204489	-6.036	-0.120399	uacccuguagauccgaauuugug	hsa-miR-10a	Down
hsa-miR-509-3p	0.93612	0.839576	0.203041	-6.036	0.15885	ugauugguacgucuguggguag	hsa-miR-509-3p	Up
hsa-miR-508-5p	0.93786	0.842227	0.19964	-6.037	0.0435646	uacuccagagggcgucacucaug	hsa-miR-508-5p	Up
hsa-miR-139-3p	0.94239	0.847384	-0.19303	-6.038	-0.0559725	ggagacgcggcccuguuggagu	hsa-miR-139-3p	Down
hsa-miR-642	0.94338	0.849374	0.190482	-6.039	0.12682	gucccucuccaaaugugucuug	hsa-miR-642	Up
hsa-miR-505	0.94354	0.850603	-0.188909	-6.039	-0.121613	cgucaacacuugcugguuuccu	hsa-miR-505	Down
hsa-miR-935	0.94439	0.852745	-0.186169	-6.039	-0.126679	ccaguuaccgcuuccgcuaccgc	hsa-miR-935	Down
hsa-miR-1297	0.94439	0.853562	0.185123	-6.04	0.104414	uucaaguaauucaggug	hsa-miR-1297	Up
hsa-miR-937	0.94544	0.856183	0.181772	-6.04	0.105209	auccgcgcucugacucucugcc	hsa-miR-937	Up
hsa-miR-92a-1*	0.94544	0.856702	-0.181109	-6.04	-0.138317	agguugggaucgguugcaaugcu	hsa-miR-92a-1*	Down
hsa-miR-208b	0.95242	0.864132	-0.171623	-6.042	-0.0761774	auaagacgaacaaaagguuugu	hsa-miR-208b	Down
hsa-miR-19a*	0.95419	0.866845	-0.168162	-6.042	-0.105925	aguuuugcauaguugcacuaca	hsa-miR-19a*	Down
hsa-miR-493	0.95559	0.869219	-0.165136	-6.043	-0.107296	ugaaggucuacugugugccagg	hsa-miR-493	Down
hsa-miR-222	0.9576	0.872159	0.161391	-6.043	0.0516861	agcuacaucuggcuacugggu	hsa-miR-222	Up
hsa-miR-627	0.958	0.874313	0.158649	-6.044	0.0378471	gugagucucuaagaaaagagga	hsa-miR-627	Up
hsa-miR-637	0.958	0.874741	-0.158103	-6.044	-0.116843	acugggggcuuucgggcucugcgu	hsa-miR-637	Down
hsa-miR-28-3p	0.95917	0.877617	-0.154444	-6.045	-0.0510423	cacuagauugugagcuccugga	hsa-miR-28-3p	Down
hsa-miR-1243	0.95917	0.878035	-0.153912	-6.045	-0.0753502	aacuggaucaauuauaggagug	hsa-miR-1243	Down
hsa-miR-181d	0.96035	0.880229	0.151122	-6.045	0.101133	aacauucauuguugucggugggu	hsa-miR-181d	Up
hsa-miR-1182	0.96146	0.883441	0.147038	-6.046	0.118414	gagggucuugggagggaugugac	hsa-miR-1182	Up
hsa-miR-221	0.96146	0.883476	0.146994	-6.046	0.0744471	agcuacauugucugcuggguuuc	hsa-miR-221	Up
hsa-let-7d	0.96199	0.885316	-0.144657	-6.046	-0.0765911	agagguaguagguugcauaguu	hsa-let-7d	Down
hsa-miR-26b	0.96199	0.888187	-0.14101	-6.046	-0.0621555	uucaaguaauucaggauaggu	hsa-miR-26b	Down
hsa-miR-188-5p	0.96199	0.888208	-0.140984	-6.046	-0.0383827	caucccuugcaugguggaggg	hsa-miR-188-5p	Down
hsa-miR-29c	0.96199	0.888722	0.140331	-6.047	0.0494942	uagcaccauuugaaaucgguua	hsa-miR-29c	Up
hsa-miR-129*	0.96199	0.890745	-0.137763	-6.047	-0.08429	aagcccuuaccccaaaaaguau	hsa-miR-129*	Down
hsa-miR-548b-3p	0.96199	0.892112	-0.136029	-6.047	-0.0672289	caagaaccucaguugcuuuugu	hsa-miR-548b-3p	Down
hsa-miR-769-5p	0.96199	0.892831	-0.135117	-6.047	-0.095903	ugagaccucuggguucugagcu	hsa-miR-769-5p	Down
hsa-miR-1255b	0.96199	0.893779	0.133914	-6.047	0.0501776	cggaugagcaaagaaagugguu	hsa-miR-1255b	Up
hsa-miR-548f	0.96199	0.896915	0.129938	-6.048	0.0843244	aaaaacuguaauuacuuuu	hsa-miR-548f	Up
hsa-miR-518b	0.96199	0.896997	0.129833	-6.048	0.0604681	caaagcgcuccccuuuagaggu	hsa-miR-518b	Up
hsa-miR-223	0.96199	0.897225	-0.129545	-6.048	-0.0414946	ugucaguuugucaaauacccca	hsa-miR-223	Down
hsa-miR-1185	0.96199	0.898338	0.128133	-6.048	0.0883237	agaggauacccuuuguauguu	hsa-miR-1185	Up
hsa-miR-335	0.96199	0.898451	0.127991	-6.048	0.0437672	ucaagagcaauaacgaaaaaugu	hsa-miR-335	Up
hsa-miR-1256	0.96208	0.899647	-0.126475	-6.048	-0.0597951	aggcauugacuucucacuagcu	hsa-miR-1256	Down
hsa-miR-924	0.96215	0.901545	0.124071	-6.049	0.0863953	agagucuugugaugucuugc	hsa-miR-924	Up
hsa-miR-550*	0.96215	0.901948	0.12356	-6.049	0.0476001	ugucuuacucccucaggcacau	hsa-miR-550*	Up
hsa-miR-30d*	0.96219	0.903102	-0.122099	-6.049	-0.0712094	cuuucagucagauguuugcugc	hsa-miR-30d*	Down
hsa-miR-149	0.96813	0.909796	0.113625	-6.05	0.0744515	ucuggcuccgugucuucacuccc	hsa-miR-149	Up
hsa-miR-499-5p	0.96951	0.912212	0.110569	-6.05	0.0741452	uuaagacuugcagugauguuu	hsa-miR-499-5p	Up
hsa-miR-338-5p	0.97053	0.9147	0.107423	-6.05	0.0646889	aacaauauccuggugcugagug	hsa-miR-338-5p	Up
hsa-miR-122*	0.97053	0.916242	-0.105474	-6.051	-0.0620071	aacgccauuaucacacuaaaua	hsa-miR-122*	Down
hsa-miR-20b*	0.97053	0.91655	0.105085	-6.051	0.0373902	acuguaguaugggcacuuccag	hsa-miR-20b*	Up
hsa-miR-624*	0.97133	0.91843	-0.102709	-6.051	-0.0718809	uaguaccaguaccuuguguuca	hsa-miR-624*	Down
hsa-miR-136*	0.97526	0.923273	-0.096591	-6.051	-0.0529898	caucaucgucucaaaugagucu	hsa-miR-136*	Down
hsa-miR-517c	0.9754	0.92542	0.09388	-6.052	0.0652805	aucgugcauccuuuuagagugu	hsa-miR-517c	Up
hsa-miR-302c*	0.9754	0.925673	0.09356	-6.052	0.0614459	uuuaacauggggguaccugcug	hsa-miR-302c*	Up
hsa-miR-1273	0.9756	0.926989	0.091899	-6.052	0.0353018	gggcgacaaagcaagacucuuucuu	hsa-miR-1273	Up
hsa-miR-616	0.97632	0.930691	0.087227	-6.052	0.0594006	agucauuggaggguuugagcag	hsa-miR-616	Up
hsa-miR-493*	0.97632	0.931694	-0.085961	-6.052	-0.0551997	uuguacaugguaggcuuucauu	hsa-miR-493*	Down
hsa-miR-218-2*	0.97632	0.931815	-0.085809	-6.052	-0.0458978	caugguucugucaagcaccgcg	hsa-miR-218-2*	Down
hsa-miR-296-3p	0.97632	0.932195	0.08533	-6.052	0.0609592	gaggguuggguggaggcucucc	hsa-miR-296-3p	Up
hsa-miR-548c-5p	0.97787	0.935941	0.080604	-6.053	0.0589526	aaaaguaauugcgguuuuugcc	hsa-miR-548c-5p	Up
hsa-miR-346	0.97787	0.935948	0.080596	-6.053	0.0334253	ugucugcccgcaugccugccucu	hsa-miR-346	Up
hsa-miR-921	0.978	0.937204	0.079012	-6.053	0.0383124	cuagugagggacagaaccaggauuc	hsa-miR-921	Up
hsa-miR-196a*	0.97883	0.941701	-0.073343	-6.053	-0.0201539	cggcaacaagaaacugccugag	hsa-miR-196a*	Down
hsa-miR-876-3p	0.97883	0.941932	0.073052	-6.053	0.0496015	uggugguuuacaaaguaauuca	hsa-miR-876-3p	Up
hsa-miR-151-3p	0.97883	0.943342	-0.071275	-6.054	-0.0240258	cuagacugaagcuccuugagg	hsa-miR-151-3p	Down
hsa-miR-199b-5p	0.97883	0.94391	0.07056	-6.054	0.0503188	cccaguguuuagacuaucuguuc	hsa-miR-199b-5p	Up
hsa-miR-30e*	0.97883	0.944639	0.069641	-6.054	0.0418081	cuuucagucggauguuuacagc	hsa-miR-30e*	Up
hsa-miR-520h	0.97883	0.945484	-0.068577	-6.054	-0.0409889	acaaagugcuucccuuuagagu	hsa-miR-520h	Down
hsa-miR-671-3p	0.97883	0.945937	0.068005	-6.054	0.0469861	uccgguucucagggcuccacc	hsa-miR-671-3p	Up
hsa-miR-23a*	0.97891	0.94715	0.066478	-6.054	0.0545984	gggguuccuggggaugggauuu	hsa-miR-23a*	Up
hsa-miR-1271	0.98218	0.951514	0.06098	-6.054	0.0209513	cuuggcaccuagcaagcacuca	hsa-miR-1271	Up
hsa-miR-561	0.98218	0.952587	-0.05963	-6.054	-0.0358754	caaaguuuaagauccuugaagu	hsa-miR-561	Down
hsa-miR-629*	0.98726	0.959395	-0.051059	-6.055	-0.0182384	guucucccaacguaagcccagc	hsa-miR-629*	Down
hsa-miR-648	0.98726	0.96071	0.049405	-6.055	0.0237465	aagugugcagggcacuggu	hsa-miR-648	Up
hsa-miR-138-1*	0.98726	0.960952	-0.0491	-6.055	-0.0203109	gcuacuucacaacaccagggcc	hsa-miR-138-1*	Down
hsa-miR-185	0.98805	0.962859	-0.0467	-6.055	-0.008005	uggagagaaaggcaguuccuga	hsa-miR-185	Down
hsa-miR-887	0.99068	0.967836	0.040439	-6.055	0.0145325	gugaacgggcgccaucccgagg	hsa-miR-887	Up
hsa-miR-603	0.99068	0.969007	-0.038966	-6.055	-0.014523	cacacacugcaauuacuuuugc	hsa-miR-603	Down
hsa-miR-548l	0.99068	0.969549	0.038284	-6.055	0.0258593	aaaaguauuugcggguuuuguc	hsa-miR-548l	Up
hsa-miR-1264	0.99068	0.971756	-0.035508	-6.055	-0.021471	caagucuuauuugagcaccuguu	hsa-miR-1264	Down
hsa-miR-625	0.99068	0.971973	0.035235	-6.055	0.0255877	agggggaaaguucuauagucc	hsa-miR-625	Up
hsa-miR-376c	0.99068	0.972316	-0.034804	-6.055	-0.0152413	aacauagaggaaauuccacgu	hsa-miR-376c	Down
hsa-miR-510	0.9944	0.977119	-0.028763	-6.056	-0.0164929	uacucaggagaguggcaaucac	hsa-miR-510	Down
hsa-miR-939	0.9953	0.979156	-0.026202	-6.056	-0.0155069	uggggagcugaggcucugggggug	hsa-miR-939	Down
hsa-miR-374a	0.99635	0.981344	0.023451	-6.056	0.0095356	uuauaauacaaccugauaagug	hsa-miR-374a	Up
hsa-miR-940	0.99992	0.987786	-0.015352	-6.056	-0.0040748	aaggcagggcccccgcucccc	hsa-miR-940	Down
hsa-miR-656	0.99992	0.988885	0.013971	-6.056	0.0104107	aauauuauacagucaaccucu	hsa-miR-656	Up
hsa-miR-22*	0.99992	0.991022	-0.011284	-6.056	-0.0062552	aguucuucaguggcaagcuuua	hsa-miR-22*	Down
hsa-miR-1226	0.99992	0.991268	0.010976	-6.056	0.0054956	ucaccagcccuguguucccuag	hsa-miR-1226	Up
hsa-miR-1204	0.99992	0.991834	-0.010265	-6.056	-0.0076589	ucguggccuggucuccauuau	hsa-miR-1204	Down
hsa-miR-384	0.99992	0.99189	0.010194	-6.056	0.006061	auuccuagaaauuguucaua	hsa-miR-384	Up
hsa-miR-425	0.99992	0.993137	-0.008626	-6.056	-0.0020313	aaugacacgaucacucccguuga	hsa-miR-425	Down
hsa-miR-542-5p	0.99992	0.996528	0.004364	-6.056	0.0012568	ucggggaucaucaugucacgaga	hsa-miR-542-5p	Up
hsa-miR-34a*	0.99992	0.996907	-0.003887	-6.056	-0.0015033	caaucagcaaguauacugcccu	hsa-miR-34a*	Down
hsa-miR-29b-2*	0.99992	0.997553	0.003076	-6.056	0.0019097	cugguuucacaugguggcuuag	hsa-miR-29b-2*	Up
hsa-let-7b*	0.99992	0.998861	0.001431	-6.056	0.0011258	cuauacaaccuacugccuuccc	hsa-let-7b*	Up
hsa-miR-200b	0.99992	0.999283	0.000901	-6.056	0.0003604	uaauacugccugguaaugauga	hsa-miR-200b	Up
hsa-miR-1267	0.99992	0.999916	-0.000106	-6.056	-6.96e-05	ccuguugaaguguaaucccca	hsa-miR-1267	Down
